# Supplementary material
Source: HighWire-hosted journal article supplement (doi:10.1101/rna.080884.125)
Supplement: Supplemental_file_1_riboseq.xlsx [file Supplemental_file_1_riboseq.xlsx]

## Sheet: legend
		GEO
	Data	GSE290861_
	sheet 1 total RNA seq reads
	sheet 2 Ribosome footprint data
	sheet 3 TE up mRNAs FC 1.5
	sheet 4 TE down mRNAs FC 1.5
	sheet 5 metaplot data of first 500 nt from start codon
	sheet 6 metaplot data of 500 nt upsream of term codon

## Sheet: counts_Ribo_RNA
name	gene	WT_1_RNA	WT_2_RNA	WT_3_RNA	def1_1_RNA	def1_2_RNA	def1_3_RNA
YAL069W	YAL069W	5	7	0	2	0	0
YAL068W-A	YAL068W-A	0	0	1	0	0	0
YAL068C	PAU8	11	11	5	9	2	7
YAL067W-A	YAL067W-A	5	14	1	3	0	2
YAL067C	SEO1	346	301	161	58	52	54
YAL066W	YAL066W	43	19	13	5	3	5
YAL064W-B	YAL064W-B	1330	1132	815	596	499	513
YAL065C	YAL065C	31	29	17	27	8	14
YAL064C-A	TDA8	44	51	22	34	26	28
YAL064W	YAL064W	41	38	19	9	6	6
YAL063C-A	YAL063C-A	108	107	62	21	9	19
YAL063C	FLO9	216	282	142	309	130	127
YAL062W	GDH3	204	249	125	300	208	164
YAL061W	BDH2	430	436	222	754	467	390
YAL060W	BDH1	3220	3132	1090	2615	1819	1522
YAL059W	ECM1	2305	2427	1564	1575	977	865
YAL059C-A	YAL059C-A	10	10	1	3	2	1
YAL058W	CNE1	1559	1324	591	593	293	357
YAL056C-A	YAL056C-A	8	21	7	7	3	6
YAL056W	GPB2	4094	4176	3103	2921	2127	2397
YAL055W	PEX22	951	502	274	725	405	259
YAL054C	ACS1	488	365	225	445	282	330
YAL053W	FLC2	5223	4601	2093	7480	4253	5811
YAL051W	OAF1	3723	2646	1437	2831	1625	1809
YAL049C	AIM2	3202	2512	1302	2222	1230	1672
YAL048C	GEM1	543	398	212	315	192	276
YAL047W-A	YAL047W-A	19	28	6	16	7	8
YAL047C	SPC72	940	819	403	661	399	448
YAL046C	BOL3	458	442	116	409	137	121
YAL044W-A	BOL1	1598	1211	467	1022	401	460
YAL045C	YAL045C	2	3	1	0	1	0
YAL044C	GCV3	2412	2181	777	3347	2039	1749
YAL043C	PTA1	4369	3968	1868	5240	2449	2592
YAL042C-A	YAL042C-A	9	19	4	3	2	2
YAL042W	ERV46	6257	8923	4356	4244	3292	2951
YAL041W	CDC24	4948	3666	1879	4383	2190	2427
YAL040C	CLN3	3432	3027	1250	3201	1350	1720
YAL039C	CYC3	1117	1749	640	3434	1759	1373
YAL038W	CDC19	243610	375032	104862	249263	121142	132717
YAL037C-B	YAL037C-B	23	45	11	9	8	3
YAL037C-A	YAL037C-A	2	5	0	0	0	1
YAL037W	YAL037W	162	187	63	132	75	90
YAL036C	RBG1	7852	7516	4570	5124	3159	4382
YAL035W	FUN12	52980	41162	36848	69430	41167	37463
YAL034C-B	YAL034C-B	0	14	2	5	3	1
YAL034W-A	MTW1	1291	985	753	1051	663	583
YAL034C	FUN19	1302	1158	452	1498	733	777
YAL033W	POP5	1641	1285	917	1014	526	741
YAL032C	PRP45	1564	1480	1013	1012	620	628
YAL031C	GIP4	2406	1871	982	1629	866	881
YAL031W-A	YAL031W-A	5	11	10	2	8	5
YAL030W	SNC1	736	603	330	620	362	340
YAL029C	MYO4	14306	10704	6666	7772	4879	6747
YAL028W	FRT2	329	293	164	307	205	144
YAL027W	SAW1	434	378	147	365	139	170
YAL026C-A	YAL026C-A	68	76	34	35	21	34
YAL026C	DRS2	8384	7266	4471	4682	2994	3588
YAL025C	MAK16	14222	8441	5890	8364	5765	6480
YAL024C	LTE1	4809	3885	2195	2998	1653	1894
YAL023C	PMT2	25639	20010	8803	14284	7001	8097
YAL022C	FUN26	2480	2336	998	2112	953	1099
YAL021C	CCR4	8995	7588	3358	6491	3091	3461
YAL020C	ATS1	636	804	299	606	430	246
YAL019W-A	YAL019W-A	10	12	8	7	1	2
YAL019W	FUN30	10024	7662	5122	8218	4869	5657
YAL018C	LDS1	11	23	4	11	3	3
YAL017W	PSK1	5045	4730	2485	3033	2086	1841
YAL016C-B	YAL016C-B	1	0	2	0	0	2
YAL016C-A	YAL016C-A	4	10	11	1	1	1
YAL016W	TPD3	7188	6544	3293	8223	5170	7010
YAL015C	NTG1	1574	1118	542	1056	616	759
YAL014C	SYN8	2308	1919	1053	1306	787	779
YAL013W	DEP1	2929	2005	1200	2914	1584	1032
YAL012W	CYS3	13332	14326	4944	17435	8511	8354
YAL011W	SWC3	2050	1595	1334	1158	695	727
YAL010C	MDM10	1114	888	352	961	477	551
YAL009W	SPO7	844	802	434	483	308	354
YAL008W	FUN14	1057	836	356	574	409	528
YAL007C	ERP2	13713	10341	6370	6356	4337	5357
YAL004W	YAL004W	48	72	31	29	25	18
YAL005C	SSA1	58561	33888	11686	69284	41951	59294
YAL003W	EFB1	60182	81954	30483	36577	20007	23176
YAL002W	VPS8	3094	2200	1272	1811	1149	1185
YAL001C	TFC3	4203	3110	1917	4188	2501	2778
YAR002W	NUP60	5512	4331	2001	3722	1942	2256
YAR002C-A	ERP1	6673	5966	4278	4220	3135	3506
YAR003W	SWD1	1955	2052	1423	1256	833	908
YAR007C	RFA1	4741	4628	1944	4539	2352	2613
YAR008W	SEN34	2612	2323	1572	2243	1231	1380
YAR014C	BUD14	10205	7359	5446	6715	4493	5471
YAR015W	ADE1	3942	2718	1684	4024	2492	3198
YAR018C	KIN3	3150	2154	1210	3080	1812	1922
YAR019C	CDC15	1612	1212	484	1646	774	751
YAR019W-A	YAR019W-A	15	14	11	15	8	6
YAR020C	PAU7	76	66	33	93	29	21
YAR023C	YAR023C	296	226	119	199	114	138
YAR027W	UIP3	1557	1287	551	1462	771	991
YAR028W	YAR028W	73	173	37	71	48	59
YAR029W	YAR029W	382	219	177	231	123	139
YAR030C	YAR030C	56	68	44	18	23	16
YAR031W	PRM9	451	340	163	113	67	62
YAR033W	MST28	324	234	137	156	65	75
YAR035W	YAT1	92	208	58	285	125	118
YAR035C-A	YAR035C-A	0	6	2	0	2	2
YAR042W	SWH1	5642	5100	2342	7123	3668	4015
YAR047C	YAR047C	0	0	0	0	0	0
YAR050W	FLO1	354	543	257	573	318	302
YAR053W	YAR053W	16	14	2	0	0	1
YAR060C	YAR060C	0	0	0	0	0	0
YAR064W	YAR064W	3	12	2	1	0	0
YAR066W	YAR066W	2	1	0	2	0	1
YAR068W	YAR068W	3	11	2	1	0	1
YAR069C	YAR069C	1	4	0	0	4	1
YAR070C	YAR070C	0	4	1	1	0	0
YAR071W	PHO11	1382	2880	2221	783	351	428
YAR073W	IMD1	63	126	77	121	88	103
YAR075W	YAR075W	2	4	4	3	3	0
YBL113C	YBL113C	1639	1611	1465	1954	1386	1215
YBL113W-A	YBL113W-A	27	20	17	18	9	15
YBL112C	YBL112C	0	0	0	0	1	0
YBL111C	YBL111C	7	10	10	3	12	10
YBL109W	YBL109W	17	28	6	28	9	3
YBL108C-A	PAU9	1	5	5	4	2	1
YBL108W	YBL108W	8	12	4	6	4	7
YBL107W-A	YBL107W-A	4	1	1	0	1	1
YBL107C	MIX23	2546	1391	873	3038	1798	1910
YBL106C	SRO77	1688	1468	1095	4248	2643	3150
YBL105C	PKC1	10927	8119	4703	17054	9077	10424
YBL104C	SEA4	4375	3485	2292	4501	3077	3909
YBL103C	RTG3	2871	1806	1002	3329	1687	1936
YBL102W	SFT2	1276	1351	487	2029	1029	1028
YBL101C	ECM21	4586	3292	1334	9748	4958	6006
YBL100W-C	YBL100W-C	23	29	16	39	45	41
YBL099W	ATP1	15061	19828	8502	24259	17653	20812
YBL100C	YBL100C	11	10	3	6	2	4
YBL098W	BNA4	1104	780	352	853	547	597
YBL097W	BRN1	3650	2141	1656	6140	3951	4444
YBL095W	MRX3	1352	1376	602	1613	1091	1177
YBL096C	YBL096C	20	35	7	56	21	18
YBL094C	YBL094C	2	3	0	4	2	10
YBL093C	ROX3	2352	2385	901	3774	1820	2184
YBL092W	RPL32	13071	22127	7269	25650	13148	11166
YBL091C-A	SCS22	310	260	124	419	221	261
YBL091C	MAP2	9095	5751	3686	13721	8046	7839
YBL090W	MRP21	1176	963	426	3867	1649	1507
YBL089W	AVT5	1311	946	565	1331	778	1022
YBL088C	TEL1	5059	4168	2577	5720	3334	4557
YBL087C	RPL23A	6343	12686	4762	8988	6376	5999
YBL086C	YBL086C	1627	1158	650	3073	1446	1169
YBL085W	BOI1	6351	4850	2489	9983	4979	5010
YBL084C	CDC27	1506	1232	583	1252	818	1002
YBL083C	YBL083C	38	26	20	42	23	42
YBL082C	ALG3	181	302	99	239	167	155
YBL081W	YBL081W	1166	1092	216	1253	656	699
YBL080C	PET112	1173	980	484	2107	1205	1303
YBL079W	NUP170	15262	11078	6158	17504	9573	12618
YBL078C	ATG8	662	368	208	3790	2462	1808
YBL077W	YBL077W	5	13	3	4	5	5
YBL076C	ILS1	38160	35198	24109	51277	34486	44895
YBL075C	SSA3	1840	1515	1177	3136	2379	2698
YBL074C	AAR2	576	440	328	636	403	452
YBL073W	YBL073W	4	10	5	2	2	3
YBL072C	RPS8A	7543	15210	3567	12911	7639	5830
YBL071C-B	YBL071C-B	3	2	0	0	0	0
YBL071C	YBL071C	15	20	7	15	10	8
YBL071W-A	KTI11	1943	1635	719	2463	1155	1124
YBL070C	YBL070C	5	10	1	0	0	3
YBL069W	AST1	452	496	223	483	271	445
YBL068W-A	YBL068W-A	0	0	0	0	0	0
YBL068W	PRS4	4098	3037	2163	3720	2433	3929
YBL067C	UBP13	6040	4829	3391	5915	4036	5675
YBL066C	SEF1	3685	3020	1381	6215	3283	3616
YBL065W	YBL065W	4	21	9	20	13	13
YBL064C	PRX1	461	451	206	2278	1626	1725
YBL063W	KIP1	2048	1705	676	3399	1606	2045
YBL061C	SKT5	7827	5836	3270	15955	9108	11640
YBL062W	YBL062W	1	12	5	2	1	0
YBL060W	YEL1	1753	1277	608	2182	1266	1644
YBL059C-A	CMC2	982	878	394	1858	985	884
YBL059W	YBL059W	296	283	75	1097	499	306
YBL058W	SHP1	10260	8784	5047	19844	12820	13551
YBL057C	PTH2	1984	2236	1159	3157	1700	1474
YBL056W	PTC3	8575	7105	5055	12139	7959	9821
YBL055C	YBL055C	1573	1484	1005	2227	1665	2543
YBL054W	TOD6	3342	2870	1180	3425	2037	4673
YBL052C	SAS3	4781	3194	2170	3724	2269	2586
YBL053W	YBL053W	0	0	1	4	1	4
YBL051C	PIN4	6281	4648	1602	12797	5093	5506
YBL050W	SEC17	4999	4402	2646	8092	5647	6562
YBL049W	MOH1	30	50	13	465	302	281
YBL048W	RRT1	0	0	0	4	9	5
YBL047C	EDE1	30067	22346	9850	65354	31083	34917
YBL046W	PSY4	3581	2481	1681	8295	5069	4272
YBL045C	COR1	10946	10532	3218	22669	11439	14276
YBL044W	YBL044W	8	10	12	8	6	2
YBL043W	ECM13	57	46	27	643	461	494
YBL042C	FUI1	5141	5876	2808	6825	5161	9205
YBL041W	PRE7	4572	4411	1316	10464	5169	5776
YBL040C	ERD2	3934	2753	1376	6702	3477	3943
YBL039W-B	YBL039W-B	144	115	57	168	88	101
YBL039C	URA7	1922	2069	1509	2608	1445	1889
YBL039C-A	YBL039C-A	0	0	0	0	0	0
YBL038W	MRPL16	2240	1802	924	3433	2142	2512
YBL037W	APL3	4835	3227	1891	6825	3850	4731
YBL036C	YBL036C	5397	4674	2760	11027	5640	5254
YBL035C	POL12	1731	1648	745	2817	1453	1876
YBL034C	STU1	3362	2777	1484	5007	2876	3015
YBL033C	RIB1	1972	2330	1028	4902	2765	2192
YBL032W	HEK2	3306	3696	1779	4128	2625	2846
YBL031W	SHE1	822	500	221	1305	491	527
YBL030C	PET9	17551	20007	8228	22837	17737	22107
YBL029C-A	YBL029C-A	281	220	89	420	250	218
YBL029W	YBL029W	275	167	52	401	231	117
YBL028C	YBL028C	1966	1866	1344	2742	1568	1796
YBL027W	RPL19B	34593	50597	20153	52584	29871	27926
YBL026W	LSM2	1560	1194	438	1722	789	1085
YBL025W	RRN10	1362	1174	598	1384	843	878
YBL024W	NCL1	12358	10056	8114	19177	11573	15118
YBL023C	MCM2	8826	5993	4387	16451	9458	10368
YBL022C	PIM1	16073	12155	7184	20993	13373	16162
YBL021C	HAP3	929	677	421	1953	909	841
YBL020W	RFT1	2420	2255	1173	2410	1503	1987
YBL019W	APN2	883	654	440	881	557	622
YBL018C	POP8	441	408	178	491	233	270
YBL017C	PEP1	18012	14059	8897	20588	12566	16427
YBL016W	FUS3	3222	2962	1247	5750	2736	2889
YBL015W	ACH1	1518	1871	842	4738	2741	2936
YBL014C	RRN6	3447	2850	1706	3635	2056	3281
YBL013W	FMT1	143	140	62	172	63	76
YBL011W	SCT1	6507	6257	3934	7372	4958	5039
YBL012C	YBL012C	17	13	16	4	3	6
YBL010C	YBL010C	1661	927	769	2675	1488	1346
YBL009W	ALK2	3046	2682	1318	3320	1808	2418
YBL008W-A	YBL008W-A	2	0	0	0	0	0
YBL008W	HIR1	3949	2820	1846	4625	2543	3213
YBL007C	SLA1	14625	15372	7103	33961	18657	19484
YBL006C	LDB7	2477	2514	1135	4439	2185	2170
YBL006W-A	YBL006W-A	44	63	32	137	50	68
YBL005W	PDR3	2567	1650	1005	2624	1431	1982
YBL004W	UTP20	25813	20410	16311	24817	15119	21913
YBL003C	HTA2	5353	7234	3260	6486	4174	5137
YBL002W	HTB2	10410	11508	3647	14974	7368	9141
YBL001C	ECM15	2033	1693	683	2665	1427	1284
YBR001C	NTH2	6121	3746	2908	11773	7460	7462
YBR002C	RER2	4297	3273	2233	5424	3545	4178
YBR003W	COQ1	4099	3089	1563	5875	3464	4661
YBR004C	GPI18	1160	803	393	1525	832	1375
YBR005W	RCR1	781	776	414	1775	1104	1283
YBR006W	UGA2	609	468	205	2053	1030	1238
YBR007C	DSF2	1772	1487	749	3401	1713	1985
YBR008C	FLR1	2181	2137	1212	4480	4162	5283
YBR009C	HHF1	38126	28462	15499	66215	38428	47700
YBR010W	HHT1	2877	5243	1102	4084	2427	2982
YBR011C	IPP1	54671	40196	21690	47270	26625	31914
YBR012C	YBR012C	0	0	0	0	0	0
YBR013C	YBR013C	2	8	2	4	4	1
YBR014C	GRX7	2346	1692	952	2906	1702	1914
YBR015C	MNN2	9253	9274	5123	11001	6607	7638
YBR016W	YBR016W	723	565	124	2050	926	373
YBR017C	KAP104	11525	8565	5191	21035	13545	16018
YBR018C	GAL7	45	32	22	41	22	20
YBR019C	GAL10	64	70	53	42	27	35
YBR020W	GAL1	146	143	83	180	153	154
YBR021W	FUR4	520	589	203	800	470	747
YBR022W	POA1	1173	778	393	1110	587	817
YBR023C	CHS3	8823	9484	5861	18589	13935	16891
YBR024W	SCO2	1245	875	454	2164	1199	1390
YBR025C	OLA1	38978	33790	21209	48051	31452	41442
YBR026C	ETR1	3502	2669	1231	5459	3595	4798
YBR027C	YBR027C	0	0	0	1	0	0
YBR028C	YPK3	3618	2745	1621	3065	1778	2442
YBR029C	CDS1	2686	2139	897	4044	2256	3400
YBR030W	RKM3	2127	1863	1585	2069	1635	2127
YBR031W	RPL4A	9995	24027	8897	12949	8641	9626
YBR032W	YBR032W	2	12	4	1	2	2
YBR033W	EDS1	128	182	64	551	364	343
YBR034C	HMT1	4556	4985	3000	4892	3509	6445
YBR035C	PDX3	2192	2554	1068	4907	3003	2423
YBR036C	CSG2	5963	5451	2789	11478	7178	7571
YBR037C	SCO1	1144	1009	364	2224	1278	1457
YBR038W	CHS2	8816	6076	3662	15245	8759	9620
YBR039W	ATP3	8264	7119	3398	16046	8813	11347
YBR040W	FIG1	20	15	10	6	3	3
YBR041W	FAT1	5052	3751	2344	7345	3807	4909
YBR042C	CST26	1561	1362	840	1494	942	1084
YBR043C	QDR3	2473	1913	1061	3111	1905	2349
YBR044C	TCM62	2233	1619	857	3073	1765	2055
YBR045C	GIP1	764	528	382	804	450	521
YBR046C	ZTA1	1534	1031	471	5646	3136	2943
YBR047W	FMP23	78	86	45	173	102	81
YBR048W	RPS11B	10159	20927	4010	15419	7959	7126
YBR049C	REB1	9533	7844	3935	11514	6173	7271
YBR050C	REG2	134	130	99	244	169	180
YBR051W	YBR051W	16	7	7	8	6	10
YBR052C	RFS1	2168	2279	779	5674	3230	2700
YBR053C	YBR053C	2001	1247	574	4692	3116	3990
YBR054W	YRO2	1828	1607	532	5187	5136	6297
YBR055C	PRP6	3554	2846	2235	3263	2244	2983
YBR056W	YBR056W	2035	1527	858	6072	4050	4972
YBR056C-B	YBR056C-B	31	26	7	25	22	17
YBR056W-A	YBR056W-A	245	224	104	2419	1285	1344
YBR057C	MUM2	846	601	471	877	574	619
YBR058C	UBP14	4481	3314	2034	8053	4819	5888
YBR058C-A	TSC3	5080	2218	1531	4285	2582	3452
YBR059C	AKL1	9773	7075	3334	24339	12293	13315
YBR060C	ORC2	3055	2100	1177	3033	1597	1662
YBR061C	TRM7	2255	1800	1217	1859	1226	1709
YBR062C	YBR062C	535	713	213	1038	527	616
YBR063C	YBR063C	1049	862	577	1282	887	1257
YBR064W	YBR064W	7	4	5	3	3	4
YBR065C	ECM2	450	255	171	627	296	438
YBR066C	NRG2	988	746	318	1558	802	649
YBR067C	TIP1	5380	3832	2390	3894	1947	2299
YBR068C	BAP2	22229	18424	9193	44396	23501	28372
YBR069C	TAT1	4528	6166	3000	7315	5199	6292
YBR070C	ALG14	778	808	437	1238	735	861
YBR071W	YBR071W	2098	1419	594	6091	3053	2754
YBR072W	HSP26	241	144	52	2981	2067	2321
YBR072C-A	YBR072C-A	28	21	5	21	9	6
YBR073W	RDH54	9460	8518	4826	17901	10351	13568
YBR074W	YBR074W	7441	5770	3546	6943	4351	5090
YBR076C-A	YBR076C-A	88	95	48	241	124	124
YBR076W	ECM8	28	30	19	56	27	45
YBR077C	SLM4	1487	1036	704	2102	1399	1544
YBR078W	ECM33	70088	63435	24293	99249	51514	64940
YBR079C	RPG1	33606	32285	22802	53853	34094	41037
YBR080C	SEC18	7041	5482	3489	17885	10954	12981
YBR081C	SPT7	8458	5566	4041	10102	6492	7024
YBR082C	UBC4	4298	3803	1095	10918	4528	2749
YBR083W	TEC1	5194	2792	1628	5044	2382	2290
YBR084W	MIS1	21036	21842	14379	16620	10468	13701
YBR084C-A	RPL19A	31472	47528	14074	42809	22414	23540
YBR085W	AAC3	527	500	279	330	225	228
YBR085C-A	YBR085C-A	1419	1463	593	4882	3505	3229
YBR086C	IST2	19110	14503	7617	21190	11993	14531
YBR087W	RFC5	2593	2270	1705	3854	2401	3268
YBR088C	POL30	5396	5739	2754	5849	3272	4359
YBR089W	YBR089W	14	24	11	7	5	5
YBR089C-A	NHP6B	910	997	395	2289	1076	1001
YBR090C	YBR090C	0	0	0	0	1	0
YBR091C	TIM12	563	426	171	883	401	408
YBR092C	PHO3	14359	10774	6925	15912	9439	12246
YBR093C	PHO5	448	957	513	786	421	474
YBR094W	PBY1	4018	2774	1672	6082	3735	4631
YBR095C	RXT2	2336	1532	1075	4554	2684	3154
YBR096W	YBR096W	1460	1020	461	2209	1375	1730
YBR097W	VPS15	2562	1801	1140	1792	1055	1385
YBR098W	MMS4	1019	940	611	1267	731	914
YBR099C	YBR099C	4	3	2	2	2	1
YBR101C	FES1	5601	4371	2662	9511	4513	4454
YBR102C	EXO84	3895	3039	1664	6617	3530	4525
YBR103W	SIF2	2852	2152	1431	4620	2899	3335
YBR103C-A	YBR103C-A	17	15	12	19	14	14
YBR104W	YMC2	3398	2939	1946	2715	1703	2902
YBR105C	VID24	775	587	294	3053	1894	2333
YBR106W	PHO88	12273	12186	5071	10655	5697	7636
YBR107C	IML3	854	609	329	1005	470	550
YBR108W	AIM3	1874	1403	574	4874	2147	1737
YBR109C	CMD1	18540	10915	5828	20644	10819	13821
YBR109W-A	YBR109W-A	3	12	0	9	6	1
YBR110W	ALG1	3373	2408	1391	4647	2541	3240
YBR111C	YSA1	31	28	4	51	26	21
YBR111W-A	SUS1	1142	799	305	1157	481	492
YBR112C	CYC8	9633	8881	3775	19445	9379	8423
YBR113W	YBR113W	14	18	1	8	2	5
YBR114W	RAD16	1951	1907	889	4774	3002	3594
YBR115C	LYS2	14082	11357	8058	17542	11690	14712
YBR116C	YBR116C	5	2	6	6	6	7
YBR117C	TKL2	98	162	60	455	465	592
YBR118W	TEF2	42100	111569	12209	53537	32912	26889
YBR119W	MUD1	625	497	344	941	566	588
YBR120C	CBP6	651	402	199	1203	637	733
YBR121C-A	YBR121C-A	8	0	0	0	0	0
YBR121C	GRS1	1698	2251	793	2866	1631	1405
YBR122C	MRPL36	3019	2067	1142	5089	2947	3168
YBR123C	TFC1	1703	1159	776	1624	1055	1395
YBR124W	YBR124W	3	5	5	5	5	7
YBR125C	PTC4	2364	1757	692	2720	1226	1539
YBR126C	TPS1	9431	9308	4354	29825	20467	21834
YBR126W-A	MEO1	53	130	16	153	90	28
YBR126W-B	YBR126W-B	111	240	45	357	259	98
YBR127C	VMA2	37377	36483	21441	60338	38355	41566
YBR128C	ATG14	138	155	63	193	111	79
YBR129C	OPY1	1070	905	628	984	713	709
YBR130C	SHE3	1917	1711	900	3582	2020	2490
YBR131W	CCZ1	1381	954	596	1221	662	969
YBR131C-A	YBR131C-A	2	5	2	0	0	0
YBR132C	AGP2	1048	1126	505	2889	1697	1652
YBR133C	HSL7	7851	6176	3419	8541	4607	5714
YBR134W	YBR134W	3	11	1	1	3	0
YBR135W	CKS1	1911	1580	569	3116	1273	1389
YBR136W	MEC1	5176	3959	2859	5405	3283	4290
YBR137W	YBR137W	1290	1058	570	1552	983	1314
YBR138C	YBR138C	931	602	346	2235	1238	1167
YBR139W	YBR139W	4625	2961	1324	9957	5896	6916
YBR140C	IRA1	13010	10553	5786	11631	8873	12104
YBR141C	BMT2	1290	1103	495	1135	781	1235
YBR141W-A	YBR141W-A	120	101	35	221	97	92
YBR142W	MAK5	6911	6103	5511	9189	6659	9000
YBR143C	SUP45	25903	18344	15824	36307	24788	33120
YBR144C	YBR144C	7	8	3	7	2	0
YBR145W	ADH5	625	515	303	505	344	390
YBR146W	MRPS9	4436	3121	1645	7743	4075	5129
YBR147W	RTC2	82	67	43	129	80	64
YBR148W	YSW1	278	259	144	193	139	143
YBR149W	ARA1	5680	3749	1634	17484	8363	10924
YBR150C	TBS1	1893	1572	1055	3031	1789	1753
YBR151W	APD1	5306	3512	2278	7883	4565	4051
YBR152W	SPP381	21	7	10	7	2	7
YBR153W	RIB7	1587	1323	796	1418	853	1167
YBR154C	RPB5	4690	4030	1635	6943	4004	3197
YBR155W	CNS1	6499	4637	4120	5798	4130	5158
YBR156C	SLI15	1841	1213	556	3307	1449	1505
YBR157C	ICS2	1026	937	504	1514	770	790
YBR158W	AMN1	8827	8806	4851	12402	6676	10258
YBR159W	IFA38	4626	3743	2149	5571	3131	3838
YBR160W	CDC28	3263	2591	1483	7254	4517	5049
YBR161W	CSH1	1012	891	443	2029	1155	1103
YBR162C	TOS1	43429	38948	20414	53824	33492	43520
YBR162W-A	YSY6	3525	2064	938	8428	3705	2339
YBR163W	EXO5	2021	1566	1163	1774	1066	1485
YBR164C	ARL1	4604	3302	2176	4945	3319	3823
YBR165W	UBS1	1004	683	279	1653	738	804
YBR166C	TYR1	4065	3420	1739	6829	4560	6072
YBR167C	POP7	336	369	184	621	404	407
YBR168W	PEX32	814	688	330	829	505	578
YBR169C	SSE2	1634	1452	617	5788	3822	4753
YBR170C	NPL4	4339	3123	1897	9908	5698	6738
YBR171W	SEC66	3502	3176	1654	4681	2935	3154
YBR172C	SMY2	5009	4002	1788	6374	3281	4211
YBR173C	UMP1	1035	655	136	3603	1580	902
YBR175W	SWD3	696	662	289	898	509	667
YBR174C	YBR174C	33	40	18	19	14	12
YBR176W	ECM31	843	693	531	994	790	928
YBR177C	EHT1	5479	3410	1826	17775	9032	10989
YBR178W	YBR178W	19	22	9	27	12	12
YBR179C	FZO1	3750	2442	1612	5742	3420	4429
YBR180W	DTR1	49	54	20	56	34	60
YBR181C	RPS6B	20075	33347	14174	24176	16455	18450
YBR182C	SMP1	288	303	118	1208	653	765
YBR182C-A	YBR182C-A	56	29	23	27	10	15
YBR183W	YPC1	383	442	223	1516	1025	970
YBR184W	YBR184W	273	242	97	244	132	149
YBR185C	MBA1	1807	1126	626	2893	1673	2515
YBR186W	PCH2	39	46	17	87	37	52
YBR187W	GDT1	2241	2819	1732	1789	1519	1649
YBR188C	NTC20	537	535	226	1030	533	446
YBR189W	RPS9B	50734	53844	27375	79772	36121	37619
YBR190W	YBR190W	1	0	0	2	0	4
YBR191W	RPL21A	1044	1376	412	831	480	777
YBR191W-A	YBR191W-A	232	275	96	310	146	267
YBR192W	RIM2	3330	3036	1462	5048	2862	3794
YBR193C	MED8	789	1044	440	1223	700	844
YBR194W	AIM4	744	443	244	1112	603	661
YBR195C	MSI1	988	1084	493	1201	708	870
YBR196C	PGI1	51845	55217	20829	124821	62161	76031
YBR196C-A	YBR196C-A	116	94	64	124	88	125
YBR196C-B	YBR196C-B	1	0	0	0	0	0
YBR197C	YBR197C	1114	1124	668	1521	980	1004
YBR198C	TAF5	4698	2738	1549	9597	4540	4559
YBR199W	KTR4	8047	6288	3680	12026	7534	8443
YBR200W	BEM1	6630	3992	2522	8954	4854	6628
YBR200W-A	YBR200W-A	4	3	0	3	0	0
YBR201W	DER1	758	665	402	1019	599	665
YBR201C-A	YBR201C-A	73	56	39	103	72	59
YBR202W	MCM7	7559	6872	4101	13962	8583	9811
YBR203W	COS111	1162	1091	575	4438	2886	3251
YBR204C	LDH1	1216	1161	479	1898	1086	1038
YBR205W	KTR3	490	415	128	414	133	227
YBR206W	YBR206W	664	680	304	731	319	408
YBR207W	FTH1	3879	3557	1929	6357	3725	4885
YBR208C	DUR1	4124	4728	2669	7560	5010	5740
YBR209W	YBR209W	34	25	13	58	33	26
YBR210W	ERV15	1187	701	323	1518	754	757
YBR211C	AME1	577	482	251	710	432	402
YBR212W	NGR1	4701	3969	1438	9063	4160	4097
YBR213W	MET8	775	798	328	602	411	429
YBR214W	SDS24	1582	1142	354	5961	2660	2955
YBR215W	HPC2	2805	1966	964	4863	2517	2354
YBR216C	YBP1	2426	1718	1329	3061	1878	2090
YBR217W	ATG12	627	548	271	729	374	430
YBR218C	PYC2	17178	17209	9732	18655	12352	14373
YBR219C	YBR219C	0	2	0	3	2	0
YBR220C	YBR220C	2696	2728	1206	2061	981	1449
YBR221C	PDB1	9323	11356	4415	8952	5270	6242
YBR221W-A	YBR221W-A	7	11	4	9	1	3
YBR222C	PCS60	2166	2360	872	6305	3394	3536
YBR223C	TDP1	731	551	269	1182	633	600
YBR223W-A	YBR223W-A	4	11	7	0	3	1
YBR224W	YBR224W	22	38	7	98	50	12
YBR225W	YBR225W	1623	1228	507	2823	1322	1488
YBR226C	YBR226C	5	15	1	1	0	2
YBR227C	MCX1	5115	3679	2301	4611	2989	3300
YBR228W	SLX1	1726	1049	839	1767	1081	1098
YBR229C	ROT2	5942	4766	2241	5702	3505	4731
YBR230C	OM14	2639	2030	644	3964	2002	2384
YBR230W-A	YBR230W-A	541	409	85	1202	704	662
YBR231C	SWC5	840	857	406	1441	912	635
YBR233W	PBP2	2483	1798	888	4029	1910	2091
YBR232C	YBR232C	18	14	6	20	23	14
YBR233W-A	DAD3	844	900	275	1771	697	498
YBR234C	ARC40	3301	4243	1808	6328	3889	4030
YBR235W	VHC1	4764	3641	1794	6435	3264	4324
YBR236C	ABD1	2510	2717	1423	4785	2960	3942
YBR237W	PRP5	3449	2421	1983	4917	3185	3651
YBR238C	YBR238C	4149	3725	1709	4181	2278	3094
YBR239C	ERT1	1211	961	477	1799	914	915
YBR240C	THI2	121	141	58	236	141	113
YBR241C	YBR241C	509	546	171	1681	823	967
YBR242W	YBR242W	1615	1571	662	1965	950	1161
YBR243C	ALG7	2352	2276	989	3512	1733	1851
YBR244W	GPX2	684	521	300	846	493	646
YBR245C	ISW1	11532	9704	6781	19682	12447	15305
YBR246W	RRT2	2468	2211	1287	3493	1851	2001
YBR247C	ENP1	5131	4801	2892	6095	4104	5255
YBR248C	HIS7	6668	5286	3416	11688	7172	8928
YBR249C	ARO4	10849	13706	5827	16338	9040	9905
YBR250W	SPO23	184	109	72	120	72	113
YBR251W	MRPS5	1968	1441	816	4840	2697	2943
YBR252W	DUT1	3108	3508	1734	2770	1458	1771
YBR253W	SRB6	395	336	187	446	269	209
YBR254C	TRS20	1809	1345	820	1877	1152	1585
YBR255W	MTC4	2282	1622	1176	3282	2084	2026
YBR255C-A	RCF3	705	412	236	908	428	543
YBR256C	RIB5	4439	3538	2045	6785	4255	5623
YBR257W	POP4	869	731	360	1027	670	949
YBR258C	SHG1	550	384	182	1251	672	461
YBR259W	YBR259W	1055	830	432	1019	577	768
YBR260C	RGD1	3838	2099	1347	5143	2640	3144
YBR261C	TAE1	3383	3193	1880	4154	2257	2301
YBR262C	YBR262C	1514	1908	805	2669	2302	2030
YBR263W	SHM1	10732	12287	5773	10642	6297	7366
YBR264C	YPT10	1532	1024	569	2568	1342	1188
YBR265W	TSC10	2133	2178	1065	2508	1520	1607
YBR267W	REI1	6917	6142	4017	5352	3400	6780
YBR266C	SLM6	5	13	9	7	3	10
YBR268W	MRPL37	1507	1176	422	4025	1871	1078
YBR269C	SDH8	653	505	251	1690	796	630
YBR270C	BIT2	576	441	218	867	478	553
YBR271W	EFM2	1816	1757	1354	1740	1425	2087
YBR272C	HSM3	2779	2206	1374	4002	2783	3209
YBR273C	UBX7	3320	2981	1589	7064	4031	4568
YBR274W	CHK1	1081	1050	644	982	719	911
YBR275C	RIF1	9044	6824	4393	9903	5651	6665
YBR276C	PPS1	6202	5139	3530	5781	4163	5094
YBR277C	YBR277C	9	10	3	3	3	4
YBR278W	DPB3	1039	650	507	1762	1060	1132
YBR279W	PAF1	6741	4235	2943	15664	8800	7621
YBR280C	SAF1	719	780	371	2091	1198	1314
YBR281C	DUG2	5833	4333	1975	8629	4958	6336
YBR282W	MRPL27	1503	1185	563	5065	2707	1715
YBR283C	SSH1	11420	12102	6714	11314	7917	10020
YBR284W	YBR284W	254	234	129	584	294	374
YBR285W	YBR285W	32	34	4	101	47	44
YBR286W	APE3	32024	26563	11237	36659	17913	23093
YBR287W	YBR287W	2987	3796	1713	4922	3282	3559
YBR288C	APM3	3220	2420	1630	4959	2969	4091
YBR289W	SNF5	3381	2280	1524	3960	2338	2318
YBR290W	BSD2	1507	883	388	4591	2357	1425
YBR291C	CTP1	1008	839	607	1263	814	1024
YBR292C	YBR292C	135	70	48	86	55	69
YBR293W	VBA2	756	701	410	924	541	783
YBR294W	SUL1	147	128	56	100	84	104
YBR295W	PCA1	1515	1515	1102	4162	3180	4104
YBR296C	PHO89	762	1335	1586	2939	1610	2271
YBR297W	MAL33	739	738	473	1934	1084	1298
YBR296C-A	YBR296C-A	4	7	3	12	8	7
YBR298C	MAL31	577	437	519	1167	803	785
YBR298C-A	YBR298C-A	9	1	2	5	0	0
YBR299W	MAL32	68	59	33	146	138	146
YBR300C	YBR300C	19	44	17	9	10	10
YBR301W	PAU24	16	16	10	33	8	22
YBR302C	COS2	268	127	103	279	168	254
YCL076W	YCL076W	12	26	9	2	3	1
YCL073C	GEX1	18	23	11	3	3	2
YCL069W	VBA3	7	17	4	0	1	4
YCL068C	YCL068C	28	29	6	11	5	6
YCL067C	HMLALPHA2	0	0	0	1	0	0
YCL066W	HMLALPHA1	0	0	0	0	0	0
YCL065W	YCL065W	1	2	0	0	2	0
YCL064C	CHA1	2853	1805	1041	6940	3700	5640
YCL063W	VAC17	2996	2239	954	1616	805	909
YCL061C	MRC1	5436	4934	2726	4043	2256	2228
YCL059C	KRR1	6870	6346	5189	4385	2730	3245
YCL058C	FYV5	8	13	0	3	2	1
YCL058W-A	ADF1	887	681	351	624	378	392
YCL057C-A	YCL057C-A	1876	1933	638	1853	891	1056
YCL057W	PRD1	9023	6631	3791	7339	4920	6295
YCL056C	PEX34	872	678	487	515	416	320
YCL055W	KAR4	1802	1242	973	1320	733	1063
YCL054W-A	RDT1	288	425	203	327	223	178
YCL054W	SPB1	18204	11801	12496	12165	8660	11605
YCL052C	PBN1	3400	2731	1500	3495	2020	1692
YCL051W	LRE1	1834	1538	755	1497	646	584
YCL050C	APA1	7487	6032	2140	5417	2315	2224
YCL049C	YCL049C	730	891	515	2334	1397	1601
YCL048W-A	YCL048W-A	7	8	0	12	8	6
YCL048W	SPS22	52	56	36	37	13	18
YCL047C	POF1	780	670	316	356	252	213
YCL045C	EMC1	11771	7536	3914	7124	3343	4480
YCL046W	YCL046W	10	10	9	5	4	0
YCL044C	MGR1	1292	818	257	1608	524	437
YCL043C	PDI1	40105	32063	15056	40075	20414	22878
YCL041C	YCL041C	4	9	4	7	2	5
YCL042W	YCL042W	25	22	2	16	12	7
YCL040W	GLK1	4001	5219	1429	20938	11764	11849
YCL039W	GID7	1275	1222	455	1380	632	552
YCL038C	ATG22	696	700	394	1233	881	1086
YCL037C	SRO9	11075	8420	3581	12336	5787	5281
YCL036W	GFD2	2331	3268	1602	755	693	1511
YCL035C	GRX1	4206	2641	1044	5520	2863	3098
YCL034W	LSB5	3647	2887	1415	3960	2086	1965
YCL033C	MXR2	268	312	115	392	168	122
YCL032W	STE50	1988	1309	904	1525	744	810
YCL031C	RRP7	6349	4542	2030	5265	2513	2885
YCL030C	HIS4	6213	4822	3181	7271	5563	5976
YCL029C	BIK1	1865	1392	791	1402	678	743
YCL028W	RNQ1	8995	6973	1923	8340	3356	3806
YCL027W	FUS1	527	409	213	101	45	68
YCL026C-B	HBN1	225	232	57	665	393	377
YCL026C-A	FRM2	49	88	39	112	63	84
YCL025C	AGP1	4561	6031	2299	3661	2295	2851
YCL023C	YCL023C	9	21	5	1	0	6
YCL024W	KCC4	3441	3506	2083	2784	1587	1629
YCL022C	YCL022C	7	18	1	1	1	0
YCL021W-A	YCL021W-A	1993	1848	1349	1001	638	723
YCL018W	LEU2	2656	2761	1742	827	515	435
YCL017C	NFS1	4378	4546	2485	3703	2428	3031
YCL016C	DCC1	840	833	421	740	383	472
YCL014W	BUD3	9335	6985	4073	7137	3783	4578
YCL012C	YCL012C	1144	799	468	762	529	593
YCL011C	GBP2	687	492	447	316	242	332
YCL010C	SGF29	733	912	399	521	340	374
YCL009C	ILV6	10509	11431	4607	6788	3078	3042
YCL008C	STP22	984	698	232	1013	377	305
YCL005W-A	VMA9	4750	4171	1785	2164	1214	1397
YCL007C	YCL007C	13	32	4	29	16	22
YCL005W	LDB16	1422	1178	612	845	407	633
YCL004W	PGS1	828	729	284	671	322	371
YCL002C	YCL002C	780	846	467	371	226	325
YCL001W	RER1	3878	2265	974	1498	918	1259
YCL001W-A	YCL001W-A	39	41	24	8	7	12
YCL001W-B	YCL001W-B	41	49	19	14	17	9
YCR001W	YCR001W	8	4	4	2	3	1
YCR002C	CDC10	3971	3230	1811	4982	3042	3395
YCR003W	MRPL32	1308	910	395	1409	680	860
YCR004C	YCP4	5088	4650	2381	3972	2805	2819
YCR005C	CIT2	2678	3209	2897	5600	2872	3282
YCR006C	YCR006C	352	236	120	375	175	224
YCR007C	YCR007C	265	250	118	262	162	166
YCR008W	SAT4	6883	5493	3298	3004	2137	2579
YCR009C	RVS161	5981	3968	2475	5369	3105	4163
YCR010C	ADY2	41	65	14	33	10	29
YCR011C	ADP1	10702	7411	4849	6738	4786	5620
YCR012W	PGK1	66553	116061	27993	85545	39171	43508
YCR013C	YCR013C	23	39	31	7	1	1
YCR014C	POL4	1557	1139	719	1015	656	742
YCR015C	CTO1	1005	859	474	888	586	696
YCR016W	YCR016W	3487	2780	1915	1917	1223	1429
YCR017C	CWH43	8712	8068	4815	6366	4121	5091
YCR018C	SRD1	562	377	219	408	219	136
YCR018C-A	YCR018C-A	13	10	5	17	6	4
YCR019W	MAK32	1195	823	473	790	425	449
YCR020C	PET18	71	74	64	42	28	33
YCR020C-A	MAK31	550	471	237	233	95	160
YCR020W-B	HTL1	333	340	144	212	108	137
YCR021C	HSP30	72	75	42	368	259	188
YCR022C	YCR022C	35	41	24	26	12	15
YCR023C	YCR023C	2921	2440	1285	971	617	671
YCR024C	SLM5	1698	1116	533	1802	873	1020
YCR024C-B	YCR024C-B	229	274	188	148	114	137
YCR024C-A	PMP1	9652	8921	2180	4803	2424	3105
YCR025C	YCR025C	91	90	56	50	17	18
YCR026C	NPP1	4437	3653	2278	3900	2411	2726
YCR027C	RHB1	1588	1245	793	1077	743	886
YCR028C	FEN2	3769	2948	2219	1965	1312	1740
YCR028C-A	RIM1	548	392	373	279	229	247
YCR030C	SYP1	6663	5041	2855	6695	3859	4267
YCR031C	RPS14A	13156	35491	6292	8702	5073	5278
YCR032W	BPH1	4439	3622	2512	2201	1542	1896
YCR033W	SNT1	8970	6956	3637	5942	3166	3279
YCR034W	YCR034W	5992	5425	1869	2972	1620	2335
YCR035C	RRP43	6267	4403	3572	3860	2731	3724
YCR036W	RBK1	2425	2088	1279	2968	2175	2426
YCR037C	PHO87	1702	1473	697	2900	1690	2167
YCR038C	BUD5	570	327	127	455	208	135
YCR038W-A	YCR038W-A	0	1	0	0	0	0
YCR039C	MATALPHA2	0	0	0	0	0	0
YCR040W	MATALPHA1	0	0	0	0	0	0
YCR041W	YCR041W	10	12	2	2	9	2
YCR042C	TAF2	8067	5941	4192	6963	4452	5144
YCR043C	YCR043C	7217	5106	4118	2435	1841	2165
YCR044C	PER1	1819	1622	743	1168	617	654
YCR045W-A	YCR045W-A	806	869	446	391	233	304
YCR045C	RRT12	39	50	15	24	20	11
YCR046C	IMG1	885	1020	351	1216	629	466
YCR047C	BUD23	5852	4729	4490	4022	3018	3140
YCR047W-A	YCR047W-A	12	23	4	5	4	2
YCR049C	YCR049C	8	12	7	3	0	4
YCR048W	ARE1	2289	3060	1486	1643	998	928
YCR050C	YCR050C	5	10	7	7	2	0
YCR051W	YCR051W	4213	6147	3935	2918	1947	1492
YCR052W	RSC6	6259	5258	2273	5593	2963	2889
YCR053W	THR4	269	284	152	235	141	170
YCR054C	CTR86	1944	1374	795	979	619	1038
YCR057C	PWP2	9114	8964	5697	6273	4139	6382
YCR059C	YIH1	1079	1583	702	806	446	456
YCR060W	TAH1	820	746	323	1044	461	399
YCR061W	YCR061W	3648	2688	811	2670	1358	1218
YCR063W	BUD31	42	51	17	20	22	8
YCR064C	YCR064C	28	59	22	22	14	10
YCR065W	HCM1	3832	3616	1938	3209	1822	2025
YCR066W	RAD18	717	559	374	439	282	268
YCR067C	SED4	6204	4167	1848	5618	2622	3286
YCR068W	ATG15	850	577	246	503	245	287
YCR069W	CPR4	3534	2566	1259	2418	1189	1079
YCR071C	IMG2	1951	1436	493	2861	1038	909
YCR072C	RSA4	2501	2949	1625	3249	2383	3255
YCR073C	SSK22	1760	1445	1077	2834	2035	2403
YCR073W-A	SOL2	1155	1614	773	1200	947	760
YCR075C	ERS1	391	461	161	190	138	106
YCR075W-A	EGO2	426	339	110	170	96	113
YCR076C	FUB1	1039	799	491	927	582	562
YCR077C	PAT1	8606	9125	3975	6760	3564	3753
YCR079W	PTC6	621	783	327	609	389	288
YCR081W	SRB8	1495	1227	597	867	455	620
YCR082W	AHC2	2856	2111	1020	1695	896	984
YCR081C-A	YCR081C-A	16	16	1	3	1	2
YCR083W	TRX3	784	475	311	539	232	302
YCR084C	TUP1	17739	13341	6632	14511	7504	7474
YCR085W	YCR085W	2	2	3	0	0	0
YCR086W	CSM1	1039	684	413	706	373	339
YCR087C-A	YCR087C-A	3786	2984	2082	2360	1306	1259
YCR087W	YCR087W	2	6	2	3	1	1
YCR088W	ABP1	7962	7434	3372	11535	6657	6496
YCR089W	FIG2	1472	1113	319	1546	563	608
YCR090C	YCR090C	1841	1315	803	826	434	576
YCR091W	KIN82	1033	644	360	1601	856	534
YCR092C	MSH3	3119	2608	1554	1591	1032	1214
YCR093W	CDC39	28227	19535	11773	15148	8851	11987
YCR094W	CDC50	3923	2746	1591	2605	1304	1760
YCR095C	OCA4	1794	1236	716	1465	836	1096
YCR095W-A	YCR095W-A	348	275	187	197	89	166
YCR096C	HMRA2	33	17	9	9	11	11
YCR097W	HMRA1	275	282	72	290	128	91
YCR097W-A	YCR097W-A	1	2	0	0	1	0
YCR098C	GIT1	1074	1271	1100	1985	1608	1853
YCR099C	YCR099C	225	240	177	228	184	224
YCR100C	YCR100C	214	250	106	296	195	189
YCR101C	YCR101C	342	267	129	480	253	271
YCR102C	YCR102C	192	202	101	154	69	113
YCR102W-A	YCR102W-A	25	22	16	6	13	14
YCR104W	PAU3	20	16	7	8	1	6
YCR105W	ADH7	86	97	40	68	26	26
YCR106W	RDS1	1874	1482	1047	1081	739	1045
YCR107W	AAD3	555	551	396	438	321	420
YCR108C	YCR108C	1	6	3	3	0	1
YDL248W	COS7	409	447	229	719	477	606
YDL247W-A	YDL247W-A	0	0	1	0	0	1
YDL247W	MPH2	5	6	0	10	5	4
YDL246C	SOR2	0	0	1	0	0	0
YDL245C	HXT15	6	8	3	1	1	2
YDL244W	THI13	32	59	14	70	48	41
YDL243C	AAD4	406	392	257	834	762	781
YDL242W	YDL242W	19	27	12	15	8	14
YDL241W	YDL241W	631	537	297	1068	492	631
YDL240C-A	YDL240C-A	7	5	1	2	0	2
YDL240W	LRG1	3656	2817	1841	2943	1721	2264
YDL239C	ADY3	564	499	272	783	434	380
YDL238C	GUD1	632	606	307	1307	654	645
YDL237W	AIM6	2744	2085	1175	2768	1724	2296
YDL236W	PHO13	5171	5052	2775	7179	5115	6519
YDL235C	YPD1	4641	2466	1169	6305	2905	4093
YDL234C	GYP7	2997	2263	1434	12994	8151	9307
YDL233W	MFG1	723	654	394	2090	1321	1510
YDL232W	OST4	1467	1338	308	1968	675	656
YDL231C	BRE4	3667	3423	2072	5053	3218	4141
YDL230W	PTP1	1381	1021	520	3531	1773	1966
YDL229W	SSB1	81596	114129	47745	85958	47479	59339
YDL228C	YDL228C	8	21	8	5	7	1
YDL227C	HO	5074	5967	3777	2066	1311	1303
YDL226C	GCS1	7893	7952	3801	12746	7552	7896
YDL225W	SHS1	6291	4584	2439	15947	8635	9748
YDL224C	WHI4	5880	4186	1620	5630	2302	3023
YDL223C	HBT1	1353	915	581	4881	3008	3226
YDL222C	FMP45	201	217	97	785	437	369
YDL220C	CDC13	1532	1110	622	2195	1143	1342
YDL221W	YDL221W	35	57	14	135	103	120
YDL219W	DTD1	1383	1178	630	1470	891	888
YDL218W	YDL218W	50	67	21	38	31	45
YDL217C	TIM22	1881	2286	955	2652	1550	2031
YDL216C	RRI1	797	514	319	1504	759	745
YDL215C	GDH2	2657	2161	1140	8384	5620	7553
YDL214C	PRR2	231	187	121	405	247	238
YDL213C	NOP6	6925	4450	3725	8441	4525	5025
YDL212W	SHR3	2788	3651	1359	2677	2111	2219
YDL211C	YDL211C	543	457	209	932	444	486
YDL210W	UGA4	108	212	87	198	110	130
YDL209C	CWC2	1815	1356	1020	2329	1505	1903
YDL208W	NHP2	7419	9505	5111	9301	5549	6734
YDL207W	GLE1	4672	3543	2441	6689	3971	4149
YDL206W	YDL206W	1157	789	408	1661	822	859
YDL205C	HEM3	4989	5002	2623	8186	4346	4609
YDL204W-A	YDL204W-A	4	13	3	28	22	2
YDL204W	RTN2	839	515	302	3009	2206	2408
YDL203C	ACK1	3678	2769	1508	4213	2214	2735
YDL202W	MRPL11	1371	1026	491	2025	1114	1611
YDL201W	TRM8	7138	4830	4378	6056	3621	4363
YDL200C	MGT1	579	460	161	740	381	288
YDL199C	YDL199C	184	178	72	487	273	241
YDL198C	GGC1	4545	3838	1564	4153	2318	2659
YDL197C	ASF2	1869	1530	1008	4454	2255	1768
YDL196W	YDL196W	21	27	14	60	35	41
YDL195W	SEC31	28875	20273	10528	45551	23161	27463
YDL194W	SNF3	833	696	456	1557	925	961
YDL193W	NUS1	1638	1380	686	1623	1005	1225
YDL192W	ARF1	16363	14352	7890	15420	9492	12776
YDL191W	RPL35A	11222	14508	3199	21482	7799	5522
YDL190C	UFD2	6755	4564	2577	14998	7498	9394
YDL189W	RBS1	4195	4003	2362	6342	3822	4343
YDL188C	PPH22	4398	3722	2260	6519	4227	4804
YDL187C	YDL187C	156	125	84	245	161	168
YDL186W	YDL186W	31	47	14	22	13	16
YDL185C-A	YDL185C-A	2	13	1	3	7	0
YDL185W	VMA1	62875	53494	34397	75504	49428	60561
YDL184C	RPL41A	749	3356	449	1188	1069	468
YDL183C	YDL183C	384	421	213	618	348	478
YDL182W	LYS20	4824	6440	3355	10431	5211	7020
YDL181W	INH1	3041	2736	953	5440	4452	4664
YDL180W	YDL180W	2496	1952	1041	3337	2017	2184
YDL179W	PCL9	2691	1511	736	4372	2058	2157
YDL178W	DLD2	3356	3263	1463	3901	2347	2731
YDL177C	YDL177C	640	481	153	686	243	301
YDL176W	YDL176W	2222	1558	1095	2114	1183	1488
YDL175C	AIR2	691	656	380	1081	683	764
YDL174C	DLD1	6117	5980	3248	9657	5903	6092
YDL173W	PAR32	3294	3317	1379	6630	3202	2748
YDL172C	YDL172C	7	14	4	19	12	5
YDL171C	GLT1	40578	42160	29082	24011	16228	19814
YDL170W	UGA3	1459	1031	560	1331	810	1106
YDL169C	UGX2	139	84	41	845	497	454
YDL168W	SFA1	7392	5504	4048	14210	9874	13116
YDL167C	NRP1	6751	5326	2405	5663	3278	5852
YDL166C	FAP7	1860	2013	1221	2440	1841	1790
YDL165W	CDC36	602	616	174	1302	462	577
YDL164C	CDC9	4625	3631	2867	8372	5263	6227
YDL163W	YDL163W	6	11	6	2	3	6
YDL162C	YDL162C	5	4	5	2	1	4
YDL161W	ENT1	8321	4397	3270	24082	13061	12178
YDL160C-A	MHF2	459	446	236	381	221	303
YDL160C	DHH1	9732	6789	3140	11891	6545	8058
YDL159W-A	YDL159W-A	0	2	0	0	0	1
YDL159W	STE7	1553	1340	760	2354	1362	1643
YDL159C-B	YDL159C-B	12	5	4	1	0	7
YDL158C	YDL158C	0	0	0	0	0	0
YDL157C	YDL157C	1431	1522	644	1177	708	811
YDL156W	CMR1	699	683	453	1005	649	673
YDL155W	CLB3	1638	1415	1051	2045	1234	1657
YDL154W	MSH5	981	872	661	1198	797	766
YDL153C	SAS10	15089	9988	10453	21947	14279	14950
YDL152W	YDL152W	1	1	3	1	0	1
YDL150W	RPC53	6191	4856	3867	8582	5603	6221
YDL151C	BUD30	5	8	6	1	2	3
YDL149W	ATG9	1087	875	450	1739	1023	995
YDL148C	NOP14	9412	7184	6200	19054	12213	13580
YDL147W	RPN5	16975	12032	8141	37213	22158	27650
YDL146W	LDB17	792	690	402	986	551	600
YDL145C	COP1	33203	27376	16556	49756	30335	37297
YDL144C	YDL144C	3456	3318	1455	6144	3411	3243
YDL143W	CCT4	12095	12145	8971	17435	12916	15728
YDL142C	CRD1	1078	806	538	1838	1062	1222
YDL141W	BPL1	4828	4047	2003	4770	2667	2917
YDL140C	RPO21	37411	31715	20782	48872	32487	40727
YDL139C	SCM3	472	317	205	940	523	448
YDL138W	RGT2	2021	1588	766	2589	1441	1550
YDL137W	ARF2	6948	6377	2742	10049	6345	6695
YDL136W	RPL35B	15269	16515	5197	20729	9650	8839
YDL135C	RDI1	4721	3297	1509	5153	3185	4334
YDL134C	PPH21	5756	4639	2694	7967	4974	5748
YDL133C-A	RPL41B	2778	4925	1538	4011	2363	2195
YDL133W	SRF1	2759	1981	1225	3747	2093	2447
YDL132W	CDC53	8711	5981	3447	14619	8101	9750
YDL131W	LYS21	6671	5872	2912	12404	7909	10754
YDL130W-A	STF1	879	477	147	3832	1981	1536
YDL130W	RPP1B	7215	14759	4214	11838	6992	5680
YDL129W	YDL129W	852	911	452	1097	660	804
YDL128W	VCX1	5861	5222	2556	8475	4871	6149
YDL127W	PCL2	917	857	341	1398	660	882
YDL126C	CDC48	56786	45818	29753	121388	84108	105580
YDL125C	HNT1	2905	3149	1353	5929	2943	3180
YDL124W	YDL124W	10271	5386	3401	26998	20655	26313
YDL123W	SNA4	707	577	291	1131	549	531
YDL122W	UBP1	13955	10295	8364	18030	12787	15356
YDL121C	YDL121C	3090	2662	2006	2395	1639	2091
YDL120W	YFH1	1916	2018	884	3716	1916	2013
YDL119C	HEM25	1089	694	261	3765	1760	2279
YDL118W	YDL118W	8	8	5	3	7	9
YDL117W	CYK3	5708	4042	2166	8659	4502	5762
YDL116W	NUP84	4413	3976	2063	9511	5935	7399
YDL115C	IWR1	2265	1486	1181	4728	3185	3160
YDL114W-A	YDL114W-A	34	37	15	27	19	22
YDL114W	YDL114W	27	23	4	22	18	19
YDL113C	ATG20	1688	1411	844	3861	2309	2048
YDL112W	TRM3	10280	8610	6011	9317	5602	7540
YDL111C	RRP42	4218	3222	1581	4627	2747	3896
YDL110C	TMA17	2486	2033	884	5589	3307	2564
YDL109C	YDL109C	828	617	340	1094	556	648
YDL108W	KIN28	1946	1233	730	2308	1198	1642
YDL107W	MSS2	1165	748	429	1793	1158	1186
YDL106C	PHO2	1857	1338	733	3784	2021	1874
YDL105W	NSE4	895	651	416	1447	950	1065
YDL104C	QRI7	479	366	204	614	360	512
YDL103C	QRI1	3705	3363	1669	8199	4602	5747
YDL102W	POL3	3677	3208	2095	6163	4215	5287
YDL101C	DUN1	1859	1693	795	3193	1665	1728
YDL100C	GET3	10758	8495	4050	13544	7159	8942
YDL099W	BUG1	3304	1718	844	8882	4813	2999
YDL098C	SNU23	841	569	315	623	354	402
YDL097C	RPN6	8225	7017	4036	16366	11112	12473
YDL096C	OPI6	11	12	6	13	2	5
YDL095W	PMT1	20893	19690	9009	22904	15303	17850
YDL094C	YDL094C	25	30	22	28	6	9
YDL093W	PMT5	2879	2373	1470	2996	1861	2158
YDL092W	SRP14	3633	1758	1352	5215	2511	3061
YDL091C	UBX3	1454	1017	423	2298	1016	1178
YDL090C	RAM1	2156	1667	965	2176	1176	1474
YDL089W	NUR1	1713	1363	582	1620	887	1031
YDL088C	ASM4	763	702	232	1001	503	723
YDL087C	LUC7	1433	1035	555	2241	1084	1256
YDL086W	YDL086W	3921	4077	1645	4972	2959	3219
YDL086C-A	YDL086C-A	92	87	64	43	40	43
YDL085C-A	YDL085C-A	442	484	173	687	467	165
YDL085W	NDE2	95	105	45	407	277	364
YDL084W	SUB2	22675	22083	11050	18540	13173	18050
YDL083C	RPS16B	17173	25449	7889	21828	9593	12179
YDL082W	RPL13A	21806	29235	11269	37258	16972	17767
YDL081C	RPP1A	4196	9666	4759	7051	5769	3382
YDL080C	THI3	2174	1628	875	3513	1742	2146
YDL079C	MRK1	130	147	45	173	150	112
YDL078C	MDH3	5301	5759	2580	8539	5172	5927
YDL077C	VAM6	2572	1940	1071	2782	1665	2247
YDL076C	RXT3	1311	1091	367	2323	1118	937
YDL075W	RPL31A	22748	30174	11062	38426	20760	15905
YDL074C	BRE1	9359	7067	4836	9431	6045	8094
YDL073W	AHK1	4772	3584	2012	4474	2854	3612
YDL072C	YET3	2193	2305	806	6619	3751	4652
YDL071C	YDL071C	3	3	0	2	1	1
YDL070W	BDF2	4881	4162	2065	10486	6087	7179
YDL069C	CBS1	398	347	200	288	189	219
YDL068W	YDL068W	20	28	11	39	13	15
YDL067C	COX9	1634	1883	495	3563	2363	1235
YDL066W	IDP1	15559	13887	6508	11642	7807	9939
YDL065C	PEX19	3307	2249	1512	6522	3980	3379
YDL064W	UBC9	2941	2120	795	3723	1615	2020
YDL063C	SYO1	3459	3299	2445	3008	2488	4837
YDL062W	YDL062W	10	11	3	4	1	4
YDL061C	RPS29B	6689	9065	3227	7700	4044	5388
YDL060W	TSR1	9843	7864	6309	13125	8835	10827
YDL059C	RAD59	481	358	173	663	395	433
YDL058W	USO1	14551	10708	8094	18571	12285	12432
YDL057W	YDL057W	505	378	222	1335	702	871
YDL056W	MBP1	3900	2536	1238	5216	2492	2663
YDL055C	PSA1	30702	35754	17996	44068	27427	36923
YDL054C	MCH1	827	697	264	1101	565	691
YDL053C	PBP4	2204	1901	770	3763	1734	1761
YDL052C	SLC1	5538	3505	2076	5812	3275	3412
YDL051W	LHP1	9560	7963	5892	11074	6628	8002
YDL050C	YDL050C	1	1	0	0	0	1
YDL049C	KNH1	158	143	75	415	163	197
YDL048C	STP4	419	455	169	2002	1060	998
YDL047W	SIT4	5514	4817	2791	8114	4338	5211
YDL046W	NPC2	4159	4135	1785	9463	5361	5901
YDL045W-A	MRP10	768	479	238	1687	788	764
YDL045C	FAD1	1301	973	496	2330	1350	1580
YDL044C	MTF2	1348	1076	814	2028	1220	1260
YDL043C	PRP11	1859	1293	690	2257	1367	1714
YDL042C	SIR2	1987	1690	681	2200	1038	1580
YDL041W	YDL041W	31	29	20	25	28	26
YDL040C	NAT1	9814	8041	4959	14268	8587	10510
YDL039C	PRM7	340	1098	238	333	123	277
YDL037C	BSC1	202	874	137	92	35	124
YDL036C	PUS9	2181	1714	1161	2114	1344	1521
YDL035C	GPR1	4205	3663	1970	5647	3558	3990
YDL034W	YDL034W	7	24	4	12	8	8
YDL033C	SLM3	1359	1081	576	2089	1006	1316
YDL032W	YDL032W	11	16	8	19	5	10
YDL031W	DBP10	10400	8291	6607	15567	9859	11999
YDL030W	PRP9	2118	1615	1044	1911	1025	1425
YDL029W	ARP2	7857	5329	3717	14027	10165	13071
YDL028C	MPS1	2582	2059	1198	3378	2034	2171
YDL027C	MRX9	2396	1136	620	3815	1994	2124
YDL026W	YDL026W	21	32	15	28	12	25
YDL025C	RTK1	1670	1283	565	4203	2269	2152
YDL025W-A	YDL025W-A	78	68	28	28	11	18
YDL024C	DIA3	165	121	41	330	201	271
YDL022C-A	YDL022C-A	6	8	2	3	7	4
YDL022W	GPD1	5256	4099	1810	11691	7797	7034
YDL023C	YDL023C	15	27	10	11	7	8
YDL021W	GPM2	201	128	51	609	447	552
YDL020C	RPN4	6510	4230	2679	11971	6858	5137
YDL019C	OSH2	11494	8338	5026	15237	8907	9056
YDL018C	ERP3	1525	1216	620	2371	1370	1449
YDL017W	CDC7	883	902	441	1943	1322	1580
YDL016C	YDL016C	1	9	1	1	0	1
YDL015C	TSC13	5881	4719	1976	6956	3987	5449
YDL014W	NOP1	56718	59002	35160	55477	36555	40525
YDL013W	SLX5	3832	2854	1788	5480	3036	3522
YDL012C	YDL012C	642	555	158	1409	628	338
YDL010W	GRX6	1615	1767	887	3514	2148	2004
YDL011C	YDL011C	6	9	0	2	1	3
YDL009C	YDL009C	6	7	4	2	0	3
YDL008W	APC11	1721	1092	465	1007	609	936
YDL007C-A	YDL007C-A	7	12	2	6	3	3
YDL007W	RPT2	14874	9479	6204	37078	23596	28231
YDL006W	PTC1	2368	1627	1323	3452	2217	2449
YDL005C	MED2	3374	2188	1101	5393	2862	3346
YDL004W	ATP16	5635	5134	2174	9223	5219	6175
YDL003W	MCD1	5316	3954	2406	11763	6577	6379
YDL002C	NHP10	3146	2408	1502	3622	2374	2345
YDL001W	RMD1	1948	1551	1063	2285	1725	1908
YDR001C	NTH1	5379	3864	1818	29070	16666	20052
YDR002W	YRB1	10218	11768	6240	15869	10120	10051
YDR003W	RCR2	464	402	192	767	429	558
YDR003W-A	YDR003W-A	354	284	212	804	501	520
YDR004W	RAD57	1973	1673	989	2333	1294	1756
YDR005C	MAF1	1497	1354	661	1672	975	1248
YDR006C	SOK1	3060	2732	1043	4844	2529	3643
YDR007W	TRP1	278	423	190	382	324	320
YDR008C	YDR008C	90	83	37	92	39	60
YDR009W	GAL3	291	251	130	1106	613	653
YDR010C	YDR010C	31	58	19	116	63	44
YDR011W	SNQ2	26181	22134	11608	33081	22269	25685
YDR012W	RPL4B	12088	24168	7185	17880	9684	10975
YDR013W	PSF1	357	392	236	597	370	443
YDR014W	RAD61	878	719	485	1106	713	935
YDR014W-A	HED1	59	54	27	168	97	76
YDR015C	YDR015C	0	3	0	0	0	0
YDR016C	DAD1	278	242	115	245	149	175
YDR017C	KCS1	5977	5079	3536	8644	5153	6122
YDR018C	YDR018C	57	53	46	232	150	160
YDR019C	GCV1	2937	1301	593	10129	5334	7052
YDR020C	DAS2	1223	1141	578	875	600	940
YDR021W	FAL1	1273	1165	671	1153	817	1382
YDR022C	YDR022C	355	321	119	391	210	196
YDR023W	SES1	24256	21048	12017	46968	22875	27519
YDR024W	FYV1	16	20	3	25	10	11
YDR025W	RPS11A	8408	22664	3654	20622	8585	7479
YDR026C	NSI1	4851	3375	2260	6443	3625	3848
YDR027C	VPS54	6050	4136	2553	7058	4184	4068
YDR028C	REG1	16343	12459	6925	28606	15254	17810
YDR029W	YDR029W	3	4	4	10	7	9
YDR030C	RAD28	1418	798	583	1898	1276	1906
YDR031W	MIX14	190	113	94	509	447	406
YDR032C	PST2	2877	2842	1087	7371	4357	4487
YDR033W	MRH1	32570	30013	12305	35293	22234	30932
YDR034C	LYS14	4135	2725	1625	4700	2532	3178
YDR034C-A	YDR034C-A	2	5	2	0	1	0
YDR034W-B	YDR034W-B	22	18	4	324	197	195
YDR035W	ARO3	9441	7325	5347	17678	11753	12601
YDR036C	EHD3	2044	1549	745	3910	1921	2456
YDR037W	KRS1	43465	35657	23571	52853	32017	43147
YDR038C	ENA5	1202	929	618	1181	735	1045
YDR039C	ENA2	15	22	16	19	33	53
YDR040C	ENA1	777	902	486	2484	1664	1644
YDR041W	RSM10	2681	2031	1283	5831	3463	4086
YDR042C	YDR042C	175	211	73	328	177	193
YDR043C	NRG1	642	365	206	2135	1005	977
YDR044W	HEM13	2192	2118	1125	3011	1499	1424
YDR045C	RPC11	2424	1826	1107	1655	994	1310
YDR046C	BAP3	8516	9706	4785	18415	12736	16592
YDR047W	HEM12	2788	3039	1737	4453	3032	3507
YDR048C	YDR048C	6	25	5	5	7	9
YDR049W	VMS1	3914	2802	1739	5542	3145	3668
YDR050C	TPI1	41258	44041	16493	62270	31458	36000
YDR051C	DET1	4401	3173	1939	7151	4483	4749
YDR052C	DBF4	5289	4345	2349	7527	4190	4235
YDR053W	YDR053W	9	18	4	18	4	31
YDR054C	CDC34	9823	6133	3738	20643	11519	12952
YDR055W	PST1	7562	5306	2321	49903	28911	37043
YDR056C	EMC10	5651	3359	2601	6392	4229	5029
YDR057W	YOS9	2643	2145	1409	4520	3043	3545
YDR058C	TGL2	151	124	65	457	360	309
YDR059C	UBC5	363	313	109	1183	513	671
YDR060W	MAK21	26419	19163	15920	35273	22564	28064
YDR061W	YDR061W	4707	2724	1756	7879	4786	5966
YDR062W	LCB2	12393	8311	6240	9773	6943	10352
YDR063W	AIM7	1279	1006	515	2051	1137	1189
YDR064W	RPS13	34888	51660	22358	35955	23816	30157
YDR065W	RRG1	728	667	357	804	480	656
YDR066C	RTR2	196	157	65	267	134	105
YDR067C	OCA6	979	774	498	1665	1061	1215
YDR068W	DOS2	4004	2329	1717	7951	4371	4163
YDR069C	DOA4	1569	1249	430	2397	1244	1391
YDR070C	FMP16	120	86	35	466	301	222
YDR071C	PAA1	3979	3423	1181	5659	2773	3399
YDR072C	IPT1	3766	3750	1256	6161	3067	4350
YDR073W	SNF11	1389	934	445	2264	983	969
YDR074W	TPS2	7601	5540	2690	26368	15210	15226
YDR075W	PPH3	3554	2358	1633	3686	2387	3666
YDR076W	RAD55	505	406	220	474	269	423
YDR077W	SED1	17798	16840	3286	153976	86237	37274
YDR078C	SHU2	178	223	117	180	102	115
YDR079W	PET100	668	556	320	1490	972	825
YDR079C-A	TFB5	1632	954	625	1680	933	1257
YDR080W	VPS41	2859	1926	1300	2693	1747	1976
YDR081C	PDC2	2739	2155	1223	4274	2188	2900
YDR082W	STN1	805	681	392	1012	609	771
YDR084C	TVP23	1410	1033	401	1716	806	1083
YDR083W	RRP8	5638	4272	3832	6684	4773	5649
YDR085C	AFR1	1721	1111	644	7061	4203	3655
YDR086C	SSS1	20756	13408	9236	19902	11676	13018
YDR087C	RRP1	5143	4072	3417	5629	3810	5555
YDR088C	SLU7	2145	1635	1068	3182	2127	1790
YDR089W	VTC5	4819	2739	1541	6057	3829	3757
YDR090C	YDR090C	1443	1242	623	1086	817	1176
YDR091C	RLI1	8285	8396	5155	10776	7064	9540
YDR092W	UBC13	315	317	172	630	431	289
YDR093W	DNF2	5126	4482	2979	5682	3594	3643
YDR094W	YDR094W	10	6	2	7	1	2
YDR095C	YDR095C	9	27	5	7	3	5
YDR096W	GIS1	2521	1887	819	4820	2382	1915
YDR097C	MSH6	6209	5727	3870	14398	8726	10007
YDR098C	GRX3	4786	3327	1358	7516	3788	3973
YDR099W	BMH2	1841	1141	384	1448	767	1097
YDR100W	TVP15	1856	1276	340	2180	1196	1525
YDR101C	ARX1	5020	6269	3441	6896	4538	6782
YDR102C	YDR102C	16	24	13	14	5	13
YDR103W	STE5	3783	2761	1734	4774	2925	3624
YDR104C	SPO71	1871	1467	896	1647	1008	1476
YDR105C	TMS1	2878	2458	1163	4037	2301	2450
YDR106W	ARP10	137	87	89	233	135	171
YDR107C	TMN2	739	522	247	899	501	636
YDR108W	TRS85	2374	1564	1105	3177	1905	2179
YDR109C	YDR109C	1757	1610	1081	3104	2294	2656
YDR110W	FOB1	2645	2353	1418	2448	1570	2208
YDR111C	ALT2	1400	2084	1192	1938	1126	1251
YDR112W	IRC2	3	13	3	11	5	10
YDR113C	PDS1	1671	1392	945	3466	1843	1692
YDR114C	YDR114C	9	7	1	5	2	0
YDR115W	MRX14	752	835	253	1440	618	783
YDR116C	MRPL1	2295	1623	866	4045	2110	2659
YDR117C	TMA64	3771	2842	1785	7472	4516	5526
YDR118W	APC4	302	342	227	510	351	430
YDR118W-A	YDR118W-A	226	135	173	179	210	222
YDR119W	VBA4	8074	6731	3849	9709	6308	7828
YDR119W-A	COX26	172	178	65	241	152	40
YDR120C	TRM1	6954	6503	4234	7256	4622	6085
YDR121W	DPB4	3485	2641	2012	4888	3026	3316
YDR122W	KIN1	5870	5112	2746	14390	8670	8457
YDR123C	INO2	1172	868	383	1833	791	979
YDR124W	YDR124W	473	282	223	586	386	365
YDR125C	ECM18	324	245	114	403	217	305
YDR126W	SWF1	474	323	154	637	285	385
YDR127W	ARO1	31183	22450	15505	41217	27963	35312
YDR128W	MTC5	6420	5431	3714	9309	5925	7530
YDR129C	SAC6	14401	12114	7042	46382	26154	30731
YDR130C	FIN1	939	668	389	1191	685	585
YDR131C	YDR131C	1006	611	375	1230	619	901
YDR132C	YDR132C	963	688	362	1589	847	1105
YDR133C	YDR133C	1859	2872	624	5480	2835	1954
YDR135C	YCF1	32840	23284	16370	40499	27754	37066
YDR136C	VPS61	15	23	6	12	9	7
YDR137W	RGP1	2561	1798	1150	3643	2167	2582
YDR138W	HPR1	4860	3416	2533	5853	3758	4448
YDR139C	RUB1	888	799	262	872	461	434
YDR140W	MTQ2	3250	1752	1100	3189	1628	2120
YDR141C	DOP1	10291	7135	4732	16835	10626	13479
YDR142C	PEX7	1151	867	442	1436	804	1035
YDR143C	SAN1	2760	1963	1076	4258	1903	1752
YDR144C	MKC7	8401	7758	4524	7555	4114	5527
YDR145W	TAF12	7103	5503	2310	11215	4976	4702
YDR146C	SWI5	6484	3931	2716	8890	5269	5042
YDR147W	EKI1	1832	1234	839	2702	1547	1880
YDR148C	KGD2	4946	4924	2870	11947	8532	8755
YDR149C	YDR149C	5	10	5	7	2	4
YDR150W	NUM1	15819	12582	7377	19102	11305	13502
YDR151C	CTH1	1690	1392	661	3504	1359	1197
YDR152W	GIR2	6399	5040	4109	13241	8726	8096
YDR153C	ENT5	4681	3718	2517	8779	5263	5978
YDR154C	YDR154C	54	51	36	7	5	17
YDR155C	CPR1	1092	1687	308	1218	542	677
YDR156W	RPA14	253	290	79	540	290	155
YDR157W	YDR157W	6	6	0	12	2	3
YDR158W	HOM2	13548	13998	6747	7903	5381	6675
YDR159W	SAC3	4985	3625	2147	4753	2750	3537
YDR160W	SSY1	2691	2172	1196	3469	2029	2453
YDR161W	ACL4	4503	4120	3463	6042	3573	4251
YDR162C	NBP2	1869	1180	606	4066	1993	1571
YDR163W	CWC15	715	349	186	1723	964	473
YDR164C	SEC1	3602	2556	1555	5321	3187	3933
YDR165W	TRM82	4473	3303	1665	4937	2388	3542
YDR166C	SEC5	3566	2523	1495	6549	3989	5083
YDR167W	TAF10	1426	1181	459	2211	1340	1268
YDR168W	CDC37	11882	6174	3953	19919	11560	15101
YDR169C	STB3	3263	1919	1108	5560	2501	2329
YDR169C-A	YDR169C-A	38	37	13	20	10	18
YDR170C	SEC7	32144	23602	14853	33379	20286	23473
YDR171W	HSP42	2180	1988	651	9673	4728	3738
YDR172W	SUP35	21314	20186	13076	61249	37271	40449
YDR173C	ARG82	791	523	412	738	603	482
YDR174W	HMO1	4512	6707	3334	6194	4211	4798
YDR175C	RSM24	4774	2868	1894	6705	4556	5888
YDR176W	NGG1	4593	3072	1914	4495	2560	2438
YDR177W	UBC1	4810	3622	2289	7636	4777	5527
YDR178W	SDH4	2124	1937	686	4430	3105	3077
YDR179C	CSN9	419	313	145	598	340	472
YDR179W-A	NVJ3	598	575	241	538	288	458
YDR180W	SCC2	3496	2811	1866	3390	2226	3325
YDR181C	SAS4	2270	1736	1132	2576	1609	1804
YDR182W	CDC1	1101	986	304	1955	1084	1028
YDR182W-A	YDR182W-A	13	7	8	18	14	19
YDR183W	PLP1	829	678	382	1142	732	801
YDR183C-A	YDR183C-A	2	0	2	3	0	0
YDR184C	ATC1	936	671	271	1058	460	848
YDR185C	UPS3	111	160	88	224	116	109
YDR186C	SND1	7923	5812	2869	14266	7365	7707
YDR188W	CCT6	14059	15972	9689	23925	16296	19703
YDR187C	YDR187C	8	21	9	5	2	2
YDR189W	SLY1	5494	3587	1676	11075	5270	6580
YDR190C	RVB1	13106	11193	7609	26624	17074	19103
YDR191W	HST4	411	487	244	548	322	339
YDR192C	NUP42	1235	1011	336	2178	966	1079
YDR193W	YDR193W	10	14	7	5	5	8
YDR194C	MSS116	10127	7896	5362	11100	7040	9846
YDR194W-A	YDR194W-A	1	1	0	2	0	0
YDR195W	REF2	2499	1961	1421	3819	2114	2783
YDR196C	CAB5	1653	1378	930	2379	1587	1677
YDR197W	CBS2	2110	1261	960	2774	1761	2138
YDR198C	RKM2	1487	1150	650	1134	774	1174
YDR200C	VPS64	2661	1856	958	5484	2777	2746
YDR199W	YDR199W	2	5	3	1	0	1
YDR201W	SPC19	1589	943	637	1764	1041	973
YDR202C	RAV2	955	867	430	1546	764	919
YDR203W	YDR203W	9	8	3	13	2	6
YDR204W	COQ4	1337	1158	469	2109	1177	1410
YDR205W	MSC2	1905	1501	764	2688	1373	1676
YDR206W	EBS1	4347	3742	1939	3419	1973	2892
YDR207C	UME6	2011	1580	679	3483	1467	1530
YDR208W	MSS4	8577	6133	3339	12657	6189	7006
YDR210W	YDR210W	1313	1235	463	1085	576	548
YDR209C	YDR209C	0	3	7	4	1	4
YDR211W	GCD6	11033	9089	7120	18222	12100	15956
YDR212W	TCP1	9129	8488	6780	11036	8955	11601
YDR213W	UPC2	2611	2106	1261	3613	1734	1875
YDR215C	YDR215C	75	111	48	125	83	98
YDR214W	AHA1	16131	11666	4208	25146	15286	17843
YDR216W	ADR1	1458	1928	799	12346	7094	8419
YDR217C	RAD9	7179	4875	3490	9300	5540	7014
YDR218C	SPR28	45	60	24	70	57	47
YDR219C	MFB1	2193	1587	893	2933	1639	1799
YDR220C	YDR220C	8	1	5	9	2	9
YDR221W	GTB1	6695	4394	2970	6830	4319	5116
YDR222W	YDR222W	1965	1210	580	1999	1192	1614
YDR223W	CRF1	177	116	86	140	118	92
YDR224C	HTB1	3830	5413	1587	5641	3025	2830
YDR225W	HTA1	11623	11150	4951	16580	8518	10401
YDR226W	ADK1	14642	15655	8158	11245	6500	7652
YDR227W	SIR4	4203	3210	1873	3710	2181	3040
YDR228C	PCF11	2493	1619	888	3831	1702	1717
YDR229W	IVY1	2398	1869	987	4278	2277	1959
YDR231C	COX20	456	642	228	1305	875	731
YDR230W	YDR230W	8	9	6	11	8	6
YDR232W	HEM1	7325	10455	4329	11334	6467	6661
YDR233C	RTN1	25990	20294	9487	47609	21112	23843
YDR234W	LYS4	6393	6384	3492	9188	5597	6350
YDR235W	PRP42	1479	1158	724	1325	844	1072
YDR236C	FMN1	989	754	403	1099	695	936
YDR237W	MRPL7	2475	1811	824	4506	2166	2894
YDR238C	SEC26	20206	17207	9411	43262	26426	34476
YDR239C	YDR239C	2361	1659	907	2819	1448	1701
YDR240C	SNU56	821	784	351	1065	520	863
YDR241W	BUD26	68	96	37	82	75	64
YDR242W	AMD2	484	422	242	1241	767	810
YDR243C	PRP28	1773	1435	1084	2070	1434	2053
YDR244W	PEX5	2675	1861	1009	5727	3042	3221
YDR245W	MNN10	7151	5949	3837	7235	4993	6286
YDR246W	TRS23	1104	611	300	2862	1212	921
YDR246W-A	YDR246W-A	11	4	3	35	16	5
YDR247W	VHS1	840	627	327	1315	789	706
YDR248C	YDR248C	1146	779	359	1016	608	523
YDR249C	YDR249C	274	289	150	334	197	282
YDR250C	YDR250C	13	20	3	18	1	4
YDR251W	PAM1	7185	5934	2670	12772	6422	6552
YDR253C	MET32	510	230	100	350	214	196
YDR252W	BTT1	451	477	228	339	250	257
YDR254W	CHL4	1215	1092	577	1581	1061	1063
YDR255C	RMD5	1308	864	488	3246	1917	1817
YDR256C	CTA1	116	138	98	173	100	110
YDR257C	RKM4	2442	2227	1766	3254	2234	2939
YDR258C	HSP78	7593	4925	2457	11557	7711	8836
YDR259C	YAP6	458	332	158	1249	701	666
YDR260C	SWM1	2712	1950	1331	6466	3922	4013
YDR261C	EXG2	3988	3139	1340	5345	3020	3616
YDR262W	YDR262W	2054	1693	1142	4109	2354	2659
YDR263C	DIN7	566	549	376	701	479	519
YDR264C	AKR1	8794	7705	4191	11210	7492	9538
YDR265W	PEX10	1047	911	565	1877	1254	1195
YDR266C	HEL2	4452	3392	1612	6037	3235	3737
YDR267C	CIA1	3565	3019	2866	4955	3617	4307
YDR268W	MSW1	1035	810	429	1314	819	1255
YDR270W	CCC2	6252	5428	3277	6402	3772	4147
YDR269C	YDR269C	8	17	5	3	2	3
YDR271C	YDR271C	22	20	7	17	6	5
YDR272W	GLO2	3915	2320	1470	8540	5183	5977
YDR273W	DON1	74	114	56	162	117	65
YDR274C	YDR274C	37	42	15	27	11	16
YDR275W	BSC2	2609	1717	1643	2439	1938	2251
YDR276C	PMP3	20667	11417	4191	25111	11426	12690
YDR277C	MTH1	878	570	504	4144	2732	2162
YDR278C	YDR278C	6	12	6	2	3	2
YDR279W	RNH202	786	761	366	970	448	592
YDR280W	RRP45	6062	5184	3985	6896	5304	7912
YDR281C	PHM6	866	1165	894	155	96	104
YDR282C	MRX10	1384	933	538	1781	1115	1133
YDR283C	GCN2	7554	5543	4455	8431	5791	7236
YDR284C	DPP1	2202	1645	718	2940	1370	1808
YDR285W	ZIP1	629	499	293	654	394	352
YDR286C	YDR286C	408	344	170	341	246	319
YDR287W	INM2	1453	1010	570	2821	1730	1758
YDR288W	NSE3	1774	1276	929	2318	1333	1516
YDR289C	RTT103	2859	1897	1197	6019	3318	3412
YDR290W	YDR290W	1	5	0	2	0	1
YDR291W	HRQ1	3420	2744	1868	4393	2701	3502
YDR292C	SRP101	12522	8689	5424	16047	9181	11654
YDR293C	SSD1	15724	10954	6191	33311	17178	17478
YDR294C	DPL1	6782	4891	2241	14854	7448	9521
YDR295C	HDA2	2097	1491	852	3384	1745	1885
YDR296W	MHR1	2047	1982	1052	5622	3524	3635
YDR297W	SUR2	3449	3603	1417	6565	3467	3870
YDR298C	ATP5	5647	5014	2940	10208	6428	8056
YDR299W	BFR2	6143	5316	2836	10873	6936	8779
YDR300C	PRO1	4161	3423	2226	6758	3350	4474
YDR301W	CFT1	6396	5376	3326	6993	4335	5332
YDR302W	GPI11	919	721	351	1442	906	1146
YDR303C	RSC3	3879	3122	1535	4434	2465	3112
YDR304C	CPR5	7919	6316	2967	11966	5250	5319
YDR305C	HNT2	899	563	338	1085	665	830
YDR306C	YDR306C	1148	746	421	1652	826	833
YDR308C	SRB7	1624	1103	905	2201	1565	1761
YDR307W	PMT7	2428	1754	840	3374	2015	2269
YDR309C	GIC2	3118	2765	1138	6328	2816	3319
YDR310C	SUM1	11269	7984	3933	13570	6700	7438
YDR311W	TFB1	3329	2379	1477	4571	2653	3114
YDR312W	SSF2	3379	2520	1808	5014	3334	4109
YDR313C	PIB1	1157	1068	624	1893	1159	1044
YDR314C	RAD34	543	372	202	629	420	421
YDR315C	IPK1	444	353	121	606	327	375
YDR316W	OMS1	3421	2195	1507	7218	4824	5022
YDR317W	HIM1	197	151	89	111	91	92
YDR318W	MCM21	802	657	371	1232	768	845
YDR319C	YDR319C	894	773	317	1356	693	787
YDR320C	SWA2	3075	2120	1169	5781	2916	3520
YDR320C-A	DAD4	189	149	26	321	160	105
YDR320W-B	YDR320W-B	68	66	24	97	70	69
YDR321W	ASP1	1583	2524	1223	1523	1007	1248
YDR322W	MRPL35	1068	859	398	2378	1515	1786
YDR322C-A	TIM11	616	863	239	1435	1428	562
YDR323C	PEP7	707	558	315	650	348	380
YDR324C	UTP4	13406	9964	7564	14566	9794	15118
YDR325W	YCG1	4914	3524	2068	8518	4421	5597
YDR326C	YSP2	7577	5396	3123	8163	4964	6779
YDR328C	SKP1	4039	4297	2467	7419	4035	3319
YDR327W	YDR327W	6	16	7	4	1	4
YDR329C	PEX3	2626	2145	1149	3501	2147	2369
YDR330W	UBX5	2941	1955	1041	4315	2385	2270
YDR331W	GPI8	2215	2053	834	2716	1487	2160
YDR332W	IRC3	1442	1144	741	1231	881	995
YDR333C	RQC1	3457	2952	1793	5085	3018	3702
YDR334W	SWR1	11724	8552	5984	16486	9932	11186
YDR335W	MSN5	8941	6811	4404	11935	7575	9828
YDR336W	MRX8	511	635	364	469	323	333
YDR337W	MRPS28	3619	2783	1619	7726	4859	5363
YDR338C	YDR338C	1335	1013	695	1531	1055	1228
YDR339C	FCF1	2149	1275	734	3401	1656	1985
YDR340W	YDR340W	12	14	3	12	12	13
YDR341C	YDR341C	24507	20228	12505	32388	18781	24593
YDR342C	HXT7	1354	1072	538	3146	3036	2578
YDR343C	HXT6	124	89	75	122	98	112
YDR344C	YDR344C	91	95	35	68	58	42
YDR345C	HXT3	17437	19473	12670	32111	28393	36156
YDR346C	SVF1	17690	15333	11440	15503	11544	14424
YDR347W	MRP1	4169	2767	1175	6201	3002	4075
YDR348C	PAL1	4955	4051	2463	7857	4830	4792
YDR349C	YPS7	5660	4397	2315	9052	4820	6686
YDR350C	ATP22	1696	1454	761	3019	1872	2253
YDR351W	SBE2	4500	3407	1908	7404	4349	5482
YDR352W	YPQ2	1329	936	470	895	434	763
YDR353W	TRR1	9212	11443	4979	17546	9908	10522
YDR354W	TRP4	3469	3399	1676	4839	2657	3215
YDR354C-A	YDR354C-A	5	6	5	6	6	2
YDR355C	YDR355C	9	9	3	4	2	1
YDR356W	SPC110	4319	3615	2170	9096	5281	5554
YDR357C	CNL1	1585	959	636	3328	1985	1979
YDR358W	GGA1	2029	1357	661	6472	3467	3833
YDR359C	EAF1	7055	4656	2417	16590	8165	8652
YDR360W	OPI7	8	16	6	4	1	4
YDR361C	BCP1	4682	3612	2663	3020	1770	2612
YDR362C	TFC6	2515	2097	1318	3108	2046	2510
YDR363W	ESC2	1694	1422	931	1824	1349	1732
YDR364C	CDC40	2188	1553	906	2326	1238	1973
YDR363W-A	SEM1	3355	1896	827	5454	3270	1961
YDR365C	ESF1	13619	10536	10696	25954	17644	19132
YDR366C	YDR366C	2	5	1	4	1	1
YDR367W	KEI1	2027	2006	906	1221	707	854
YDR368W	YPR1	4185	3032	1366	6308	3616	4713
YDR369C	XRS2	1468	1084	593	1339	804	957
YDR370C	DXO1	1050	1021	645	1116	704	1134
YDR371W	CTS2	1400	1194	541	2255	1278	1585
YDR371C-A	YDR371C-A	1	11	6	5	5	4
YDR372C	VPS74	8855	6526	4108	10712	6581	9097
YDR373W	FRQ1	1170	1135	870	1323	1138	1372
YDR374C	PHO92	9	28	9	14	12	6
YDR374W-A	WIP1	182	242	112	324	193	235
YDR375C	BCS1	2674	1832	767	3541	2076	2516
YDR376W	ARH1	2260	1736	1116	3640	2263	2824
YDR377W	ATP17	2519	2937	1155	3927	2742	3100
YDR378C	LSM6	1881	1736	915	2900	1645	1491
YDR379W	RGA2	2871	2123	1428	5325	2811	2976
YDR379C-A	SDH6	222	150	35	1066	554	427
YDR380W	ARO10	3451	3846	1549	11959	8136	11675
YDR381W	YRA1	9857	8434	4565	10816	5929	6390
YDR381C-A	YDR381C-A	161	100	65	349	230	217
YDR383C	NKP1	514	500	240	1004	714	547
YDR382W	RPP2B	12498	17691	5221	13597	9163	6295
YDR384C	ATO3	2010	2114	1586	1651	1339	1659
YDR385W	EFT2	21596	41616	14218	27213	17023	19773
YDR386W	MUS81	1087	960	558	1441	831	954
YDR387C	CIN10	759	589	361	925	583	644
YDR388W	RVS167	11384	8580	4018	23791	13858	14787
YDR389W	SAC7	6138	4133	2156	6780	3224	4373
YDR390C	UBA2	4761	3016	1851	9030	4779	6062
YDR391C	YDR391C	731	689	313	1942	1164	1274
YDR392W	SPT3	1787	1407	1067	2898	1923	1909
YDR393W	SHE9	2223	1734	933	2486	1456	1653
YDR394W	RPT3	9537	6675	3259	20347	10804	14414
YDR395W	SXM1	15490	11932	7506	20200	12807	18070
YDR397C	NCB2	1816	1817	1087	2212	1597	1823
YDR396W	YDR396W	11	14	3	14	4	8
YDR398W	UTP5	8403	8352	4932	11803	8091	12496
YDR399W	HPT1	7651	7587	4939	9957	7412	11097
YDR400W	URH1	2307	1914	729	2554	1194	1550
YDR401W	YDR401W	33	44	33	39	29	29
YDR402C	DIT2	77	65	62	69	54	68
YDR403W	DIT1	373	247	159	328	191	247
YDR404C	RPB7	2778	2932	1241	3605	2078	2617
YDR405W	MRP20	1302	1032	650	3451	1786	1427
YDR406W	PDR15	2311	1755	1040	5688	2708	3147
YDR406W-A	YDR406W-A	0	1	0	3	0	0
YDR407C	TRS120	6488	4914	2717	6918	3912	4603
YDR408C	ADE8	1741	1675	666	3279	1415	1314
YDR409W	SIZ1	1749	1282	626	2905	1324	1448
YDR410C	STE14	483	565	280	722	398	583
YDR411C	DFM1	2326	1888	671	4809	2273	2521
YDR412W	RRP17	8165	5143	4619	11401	6903	6618
YDR413C	YDR413C	2	10	2	6	0	1
YDR414C	ERD1	774	655	342	869	346	547
YDR415C	YDR415C	2395	1485	738	3478	1816	2371
YDR416W	SYF1	2555	2116	1397	3391	2560	2930
YDR418W	RPL12B	21728	34813	13168	19386	14877	18410
YDR417C	YDR417C	22	25	7	24	11	14
YDR419W	RAD30	2035	1574	1008	1874	1277	1688
YDR420W	HKR1	6663	4810	1796	12474	5234	6917
YDR421W	ARO80	2069	1592	1066	2873	1984	2417
YDR422C	SIP1	5226	3450	2070	7137	3471	4161
YDR423C	CAD1	2146	1498	840	4482	2257	1948
YDR424C	DYN2	280	268	100	681	376	179
YDR425W	SNX41	849	551	208	2078	812	810
YDR426C	YDR426C	22	13	9	5	5	5
YDR427W	RPN9	5773	3653	1979	10552	5707	9013
YDR428C	BNA7	428	463	224	215	171	271
YDR429C	TIF35	11142	11176	6934	16762	10229	10855
YDR430C	CYM1	4959	4078	1994	9995	6130	8394
YDR431W	YDR431W	5	6	3	12	4	3
YDR432W	NPL3	2734	1909	735	8916	3414	1586
YDR433W	YDR433W	9685	5895	5931	10127	8315	10854
YDR434W	GPI17	4929	3636	1800	5739	3212	4724
YDR435C	PPM1	649	680	264	1440	723	812
YDR436W	PPZ2	962	1000	517	1826	1048	830
YDR437W	GPI19	48	51	20	46	24	35
YDR438W	THI74	31	24	21	31	20	56
YDR439W	LRS4	1552	1019	496	1493	710	954
YDR440W	DOT1	3451	2570	1653	3421	2248	2532
YDR441C	APT2	4229	2849	1736	5445	3493	4531
YDR442W	YDR442W	25	37	16	13	9	15
YDR443C	SSN2	4591	3223	1632	6472	3241	3492
YDR444W	YDR444W	2925	2037	1718	3239	2333	2752
YDR445C	YDR445C	9	17	0	2	3	2
YDR446W	ECM11	29	24	14	40	25	20
YDR447C	RPS17B	7756	10915	4771	8599	5959	7264
YDR448W	ADA2	2242	1648	1094	2708	1756	1849
YDR449C	UTP6	4607	3712	2218	5313	3618	5908
YDR450W	RPS18A	26676	33136	9698	29382	14271	16845
YDR451C	YHP1	1930	1261	522	3565	1510	1718
YDR452W	PPN1	13712	8280	5149	16468	10133	11335
YDR453C	TSA2	221	173	92	369	250	212
YDR454C	GUK1	8317	8660	4506	5130	2970	4200
YDR455C	YDR455C	15	9	9	0	1	2
YDR456W	NHX1	5786	4358	2391	5382	3164	3880
YDR457W	TOM1	34695	27414	19453	38308	25092	31989
YDR458C	HEH2	4489	3493	2506	6039	3825	4371
YDR459C	PFA5	710	645	372	825	579	726
YDR460W	TFB3	2832	1851	1430	3656	2547	2697
YDR461W	MFA1	910	1223	394	790	421	305
YDR461C-A	YDR461C-A	46	37	8	123	90	30
YDR462W	MRPL28	1135	972	411	3229	1532	1384
YDR463W	STP1	5529	4069	2033	9984	5425	6199
YDR464W	SPP41	6910	5124	3412	8812	5349	5391
YDR464C-A	YDR464C-A	1	8	1	3	0	4
YDR465C	RMT2	7752	7496	6622	9193	6195	8654
YDR466W	PKH3	4875	3276	1468	6249	3050	3436
YDR467C	YDR467C	77	69	75	87	74	81
YDR468C	TLG1	4231	2466	1304	8295	4124	4772
YDR469W	SDC1	1868	1364	663	1971	991	1341
YDR470C	UGO1	1654	1275	667	2535	1501	1684
YDR471W	RPL27B	18962	19912	7501	27206	11442	11248
YDR472W	TRS31	2752	1744	845	3628	1853	3087
YDR473C	PRP3	2941	1646	1328	4989	2905	2717
YDR475C	JIP4	2726	2006	1036	5180	3030	2808
YDR476C	YDR476C	1201	1617	530	2610	1058	899
YDR477W	SNF1	5657	5032	2462	10833	5528	6148
YDR478W	SNM1	891	678	415	889	527	757
YDR479C	PEX29	1521	1185	805	3769	2342	2184
YDR480W	DIG2	682	466	259	1459	598	715
YDR481C	PHO8	7903	9319	4598	10581	4850	6440
YDR482C	CWC21	1187	651	406	2562	1425	1049
YDR483W	KRE2	9551	9953	4228	15388	6826	8822
YDR484W	VPS52	1322	923	321	1492	687	827
YDR485C	VPS72	3464	2383	1545	6035	3499	3196
YDR486C	VPS60	1226	597	276	2932	1389	1267
YDR487C	RIB3	3753	4511	2460	6600	3958	4007
YDR488C	PAC11	18	11	8	23	4	12
YDR489W	SLD5	929	805	405	1346	684	953
YDR490C	PKH1	2011	1635	934	2963	1584	1515
YDR491C	YDR491C	6	14	2	4	0	4
YDR492W	IZH1	4044	1774	1344	2337	1395	2348
YDR493W	MZM1	237	220	81	522	277	271
YDR494W	RSM28	2871	2023	791	7039	3483	3184
YDR495C	VPS3	2042	1486	927	2568	1601	1870
YDR496C	PUF6	10474	9746	7225	13904	9507	13900
YDR497C	ITR1	11811	10901	6109	28302	18090	20160
YDR498C	SEC20	2210	1633	926	3344	1739	1905
YDR499W	LCD1	1425	1080	729	2398	1342	1414
YDR500C	RPL37B	3001	5307	1259	4866	2439	2302
YDR501W	PLM2	661	591	313	1434	778	778
YDR502C	SAM2	11904	9019	4433	13126	7804	9379
YDR503C	LPP1	872	978	348	1358	954	970
YDR504C	SPG3	269	192	100	298	250	357
YDR505C	PSP1	2770	2345	790	4777	2111	2493
YDR506C	GMC1	847	648	266	1235	729	824
YDR507C	GIN4	10964	10239	6286	19812	11975	13370
YDR508C	GNP1	24281	20298	9361	44450	24409	31219
YDR509W	YDR509W	2	8	2	0	1	3
YDR510W	SMT3	15206	7814	4806	19247	8959	8069
YDR510C-A	YDR510C-A	1	2	1	1	2	1
YDR511W	SDH7	19	28	4	31	22	14
YDR513W	GRX2	473	650	203	809	468	396
YDR512C	EMI1	5039	2682	1182	12532	5814	4073
YDR514C	YDR514C	3023	2402	1666	4923	3579	4324
YDR515W	SLF1	1856	1224	515	2350	1174	1569
YDR516C	EMI2	3380	3389	1152	8634	5653	6052
YDR517W	GRH1	3612	3469	1580	6421	3438	3375
YDR518W	EUG1	3549	2331	1071	3819	1842	2564
YDR519W	FPR2	2460	2472	1126	2984	1682	2031
YDR520C	URC2	1839	1352	979	1802	1185	1586
YDR521W	YDR521W	10	11	6	13	6	13
YDR522C	SPS2	20	38	20	30	21	22
YDR523C	SPS1	86	102	80	213	104	140
YDR524C	AGE1	3672	2325	1117	4232	2233	3184
YDR524C-B	YDR524C-B	6472	10720	2258	9268	6639	4930
YDR524W-C	YDR524W-C	1	0	0	0	0	0
YDR524C-A	YDR524C-A	20	28	11	16	17	9
YDR525W	API2	1	2	2	12	6	9
YDR525W-A	SNA2	252	421	139	866	608	475
YDR527W	RBA50	3996	2788	1845	5289	3270	4065
YDR526C	YDR526C	7	18	7	9	7	3
YDR528W	HLR1	2836	2279	1177	2507	1224	1478
YDR529C	QCR7	7670	5662	2182	13577	7330	6816
YDR530C	APA2	625	491	349	1471	908	827
YDR531W	CAB1	2362	1816	743	2213	1178	1709
YDR532C	KRE28	1638	1150	805	2506	1496	1388
YDR533C	HSP31	1046	1181	1016	4616	4559	5192
YDR534C	FIT1	199	175	134	306	190	176
YDR535C	YDR535C	97	70	43	121	54	82
YDR536W	STL1	46	62	19	125	81	75
YDR538W	PAD1	1426	1656	724	1582	793	922
YDR537C	YDR537C	22	19	6	3	5	9
YDR539W	FDC1	3181	2608	1686	3722	2240	2621
YDR540C	IRC4	599	361	170	835	473	420
YDR541C	YDR541C	773	741	405	840	535	654
YDR542W	PAU10	9	13	4	7	4	5
YDR543C	YDR543C	5	10	1	1	0	2
YDR544C	YDR544C	10	17	0	5	1	0
YDR545W	YRF1-1	7	7	3	17	7	31
YDR545C-A	YDR545C-A	0	0	0	0	0	0
YIL177C	YIL177C	210	203	187	321	190	194
YIL177W-A	YIL177W-A	0	1	2	0	0	0
YIL176C	PAU14	0	0	0	0	0	0
YIL173W	VTH1	107	82	32	122	57	79
YIL172C	IMA3	0	0	0	0	0	0
YIL171W-A	YIL171W-A	0	0	0	0	0	0
YIL169C	YIL169C	98	88	34	1253	504	517
YIL166C	YIL166C	420	228	137	359	168	267
YIL165C	YIL165C	328	319	258	385	289	334
YIL164C	NIT1	229	284	164	289	158	184
YIL163C	YIL163C	24	28	24	27	11	19
YIL162W	SUC2	2785	2229	932	2122	1214	1523
YIL161W	YIL161W	1265	905	454	2516	1510	876
YIL160C	POT1	34	48	19	175	137	143
YIL159W	BNR1	2633	2094	1444	2596	1896	2504
YIL158W	AIM20	1813	1378	780	2043	1143	1363
YIL157C	COA1	1157	965	412	2822	1470	1338
YIL156W-A	YIL156W-A	13	12	4	7	4	3
YIL156W-B	YIL156W-B	405	445	123	796	507	312
YIL156W	UBP7	3279	2506	1914	6102	3906	4690
YIL155C	GUT2	1165	1515	698	4242	2676	2300
YIL154C	YIL154C	932	1321	517	3335	2261	1214
YIL153W	RRD1	1332	1394	572	2881	1439	1372
YIL152W	YIL152W	305	307	81	636	225	228
YIL151C	ESL1	3729	3066	2271	4420	2980	3556
YIL150C	MCM10	1707	1356	773	1964	1020	1446
YIL149C	MLP2	13680	9412	6543	12642	7856	8983
YIL148W	RPL40A	38704	47097	14484	47170	21054	27178
YIL147C	SLN1	10934	8313	5292	11828	6986	9279
YIL146C	ATG32	800	680	314	1157	621	755
YIL145C	PAN6	4743	3801	2409	9013	4969	6481
YIL144W	YIL144W	3022	2031	1269	6044	2971	3182
YIL143C	SSL2	4529	4245	2202	7986	5012	5433
YIL142C-A	YIL142C-A	13	11	2	13	8	14
YIL142W	CCT2	14076	12210	7013	26705	13356	16896
YIL141W	YIL141W	5	6	1	1	1	0
YIL140W	AXL2	4278	3901	1486	12939	5935	6689
YIL139C	REV7	1048	672	635	509	359	369
YIL138C	TPM2	7603	5046	3272	14155	7773	6935
YIL137C	TMA108	8137	6068	3403	20894	11355	12842
YIL136W	OM45	1918	1358	686	9527	7483	5613
YIL135C	VHS2	1944	1331	485	3805	1448	1364
YIL134C-A	YIL134C-A	53	45	16	48	26	35
YIL134W	FLX1	997	1023	523	1270	792	1047
YIL133C	RPL16A	45846	44062	23855	43126	24891	30286
YIL132C	CSM2	192	134	60	158	105	155
YIL131C	FKH1	4145	3389	1813	4779	2854	3023
YIL130W	ASG1	4818	3584	1554	5266	3149	4158
YIL129C	TAO3	11097	8819	5363	10658	6998	8248
YIL128W	MET18	6249	4830	2924	7783	4666	6719
YIL127C	RRT14	1830	1441	709	2289	1396	1164
YIL126W	STH1	19301	15775	10523	32269	19892	21940
YIL125W	KGD1	8966	8457	4435	16406	11136	13173
YIL124W	AYR1	2699	1874	844	4635	2663	3488
YIL123W	SIM1	32169	25141	10520	56075	29227	33391
YIL122W	POG1	1045	693	282	2098	937	1039
YIL121W	QDR2	629	788	334	3629	2308	2322
YIL120W	QDR1	423	349	173	290	179	181
YIL119C	RPI1	992	526	136	696	306	264
YIL118W	RHO3	6758	4471	2399	7485	3874	4417
YIL117C	PRM5	1697	1289	561	6554	3464	3944
YIL116W	HIS5	3733	1848	1077	12116	5839	6346
YIL115C	NUP159	9478	8287	4878	11160	6665	7753
YIL115W-A	YIL115W-A	0	10	2	2	0	2
YIL114C	POR2	848	784	389	711	432	405
YIL113W	SDP1	94	118	43	205	93	83
YIL112W	HOS4	5550	3888	2718	6302	4127	3998
YIL111W	COX5B	1321	1030	435	2256	1354	1003
YIL110W	HPM1	3208	2713	1840	2431	1635	2133
YIL109C	SEC24	15268	12866	7021	31304	18122	20292
YIL108W	YIL108W	4462	3424	1854	21776	11514	12022
YIL107C	PFK26	1463	1094	604	5912	3293	3431
YIL106W	MOB1	2343	1854	663	4965	2542	2159
YIL105C	SLM1	3478	2279	1085	5469	2449	2911
YIL105W-A	YIL105W-A	0	3	2	1	1	2
YIL104C	SHQ1	3059	2215	1857	3733	2947	4027
YIL103W	DPH1	1765	1814	1396	2195	1477	2042
YIL102C-A	YIL102C-A	545	465	267	923	475	652
YIL102C	YIL102C	7	15	3	4	2	3
YIL101C	XBP1	250	156	61	2393	1248	968
YIL100C-A	YIL100C-A	3	2	0	1	1	0
YIL100W	YIL100W	22	20	3	118	60	45
YIL099W	SGA1	85	116	45	654	366	408
YIL098C	FMC1	1316	721	383	3224	1583	1472
YIL097W	FYV10	498	417	198	1115	551	596
YIL096C	BMT5	940	725	429	814	486	634
YIL095W	PRK1	2277	1610	841	3423	1693	2044
YIL094C	LYS12	9454	8028	4454	11991	7072	7746
YIL093C	RSM25	3299	2191	1169	6046	3446	3221
YIL092W	YIL092W	1116	865	562	1107	740	925
YIL091C	UTP25	8528	5860	4458	11266	7681	10906
YIL090W	ICE2	4163	3333	1824	3291	2115	3031
YIL089W	YIL089W	243	206	126	169	83	120
YIL088C	AVT7	4383	3975	1522	4968	2970	3593
YIL087C	AIM19	125	83	39	240	109	77
YIL086C	YIL086C	1	2	0	3	2	1
YIL085C	KTR7	878	820	510	700	425	418
YIL084C	SDS3	868	558	336	886	710	763
YIL083C	CAB2	1502	1314	741	1686	928	1306
YIL082W	YIL082W	284	199	101	198	121	118
YIL079C	AIR1	2018	1730	772	2344	1339	1980
YIL078W	THS1	38016	36595	22601	50161	33432	44241
YIL077C	YIL077C	1434	946	631	3479	1996	1550
YIL076W	SEC28	4767	4326	2179	9944	5950	7177
YIL075C	RPN2	28511	20872	11781	62191	37605	48191
YIL074C	SER33	5723	4105	2139	6102	4102	5271
YIL073C	SPO22	363	281	141	272	173	198
YIL071C	PCI8	1202	883	501	1627	973	946
YIL072W	HOP1	83	87	50	351	174	197
YIL071W-A	YIL071W-A	4	10	7	33	20	22
YIL070C	MAM33	2847	1702	729	7343	3599	3956
YIL069C	RPS24B	27935	34476	17398	38571	21064	24893
YIL068C	SEC6	4943	3416	2125	6111	3481	4418
YIL068W-A	YIL068W-A	7	16	3	3	2	4
YIL067C	YIL067C	1603	1402	863	2291	1488	1860
YIL066W-A	YIL066W-A	5	12	3	16	3	5
YIL066C	RNR3	309	344	182	704	423	490
YIL065C	FIS1	203	169	121	524	264	286
YIL064W	EFM4	2686	2899	2510	2469	1632	1844
YIL063C	YRB2	4052	3516	1738	6914	3844	2962
YIL062C	ARC15	1066	1272	482	4369	2077	1774
YIL061C	SNP1	908	748	371	1544	694	901
YIL059C	YIL059C	401	390	199	605	253	246
YIL060W	YIL060W	9	9	3	2	5	6
YIL058W	YIL058W	14	16	9	16	14	8
YIL057C	RGI2	19	31	6	29	15	8
YIL056W	VHR1	2574	2044	830	3396	1558	1596
YIL055C	YIL055C	815	723	389	1613	906	925
YIL054W	YIL054W	22	35	14	19	15	12
YIL053W	YIL053W	48464	45164	26566	55072	33063	45089
YIL052C	RPL34B	21448	19164	9268	24455	11946	11374
YIL051C	MMF1	4767	2713	1011	5601	2776	3063
YIL050W	PCL7	1361	958	452	2742	1507	1492
YIL049W	DFG10	576	352	132	451	208	303
YIL048W	NEO1	5932	4513	2607	6617	3670	4532
YIL047C-A	YIL047C-A	51	107	65	107	93	135
YIL047C	SYG1	30	45	16	51	35	31
YIL046W-A	YIL046W-A	45	68	18	69	56	26
YIL046W	MET30	2239	2510	1405	3984	2285	2613
YIL045W	PIG2	990	583	376	1474	783	724
YIL044C	AGE2	2519	1719	562	3564	1574	1896
YIL043C	CBR1	5988	6208	3152	4334	2406	2439
YIL042C	PKP1	901	668	331	2027	927	794
YIL041W	GVP36	7512	7333	4070	14450	7680	8621
YIL040W	APQ12	1227	1116	370	1176	555	660
YIL039W	TED1	4857	4565	2724	4624	3047	3894
YIL038C	NOT3	8512	6714	3878	9952	5857	6810
YIL037C	PRM2	49	65	23	37	14	23
YIL036W	CST6	3209	2015	1163	6074	2831	2111
YIL035C	CKA1	7459	4920	3340	9981	6199	6578
YIL034C	CAP2	3088	1593	559	9010	3656	3445
YIL033C	BCY1	2478	3149	1039	7050	3888	3621
YIL032C	YIL032C	6	14	2	2	5	4
YIL031W	ULP2	1554	1299	594	1936	995	1322
YIL030W-A	YIL030W-A	0	0	0	0	0	0
YIL030C	SSM4	13367	10186	5656	10398	6366	9583
YIL029W-A	YIL029W-A	12	6	3	3	5	3
YIL029C	YIL029C	310	194	111	588	301	312
YIL028W	YIL028W	195	172	92	350	239	243
YIL027C	YIL027C	1708	1458	767	1380	1007	1422
YIL026C	IRR1	3970	3982	2392	9575	6048	7106
YIL025C	YIL025C	0	8	3	0	0	0
YIL024C	YIL024C	315	221	153	436	235	278
YIL023C	YKE4	20	13	5	98	93	47
YIL022W	TIM44	12851	11249	7128	25863	15363	17156
YIL021W	RPB3	9057	6343	4020	14839	8754	11143
YIL021C-A	YIL021C-A	6	8	3	1	0	5
YIL020C-A	YIL020C-A	2	1	2	0	1	0
YIL020C	HIS6	2688	1418	920	4692	2150	1928
YIL019W	FAF1	1040	790	592	895	620	933
YIL018W	RPL2B	23616	50798	12902	43086	22632	23213
YIL017C	VID28	1489	1359	944	3436	2212	2107
YIL016W	SNL1	1025	1167	718	1241	838	747
YIL015W	BAR1	5766	5306	2823	5158	3398	4087
YIL014C-A	YIL014C-A	124	115	37	211	123	134
YIL014W	MNT3	3792	3037	1940	3754	2337	2676
YIL013C	PDR11	894	583	268	893	512	687
YIL012W	YIL012W	23	51	38	25	8	19
YIL011W	TIR3	183	207	69	356	179	181
YIL010W	DOT5	1706	1227	472	2647	1336	1516
YIL009C-A	EST3	402	295	148	372	168	173
YIL009W	FAA3	5349	5982	3664	5045	3065	4150
YIL008W	URM1	3279	2029	1038	2970	1385	1388
YIL007C	NAS2	557	442	223	785	484	414
YIL006W	YIA6	371	336	148	720	372	374
YIL005W	EPS1	5818	4330	1940	7628	3686	4629
YIL004C	BET1	935	812	373	1592	912	881
YIL003W	CFD1	1055	954	709	752	634	874
YIL002W-A	YIL002W-A	2449	1418	554	2251	1476	590
YIL002C	INP51	5715	3849	2523	6459	4426	5159
YIL001W	YIL001W	1479	1038	721	2095	1129	1442
YIR001C	SGN1	2346	1584	748	3730	1993	2026
YIR002C	MPH1	5848	4277	3175	4600	3114	3571
YIR003W	AIM21	4331	3191	1864	12352	6859	7054
YIR004W	DJP1	5842	4059	2908	11323	7122	6978
YIR005W	IST3	105	82	35	106	60	52
YIR006C	PAN1	19491	15128	6964	35647	17733	19558
YIR007W	EGH1	1132	720	332	2820	1660	1923
YIR008C	PRI1	1413	1415	852	1704	1146	1364
YIR009W	MSL1	1004	669	370	1677	784	658
YIR010W	DSN1	3224	2260	1122	4933	2537	2182
YIR011C	STS1	2430	1895	756	5560	2883	3488
YIR012W	SQT1	6898	7021	4156	10833	6920	9034
YIR013C	GAT4	17	40	11	24	3	14
YIR014W	YIR014W	528	361	211	662	402	257
YIR015W	RPR2	200	101	52	370	166	94
YIR016W	YIR016W	529	660	311	1019	522	381
YIR017C	MET28	1418	713	340	1822	934	654
YIR017W-A	YIR017W-A	7	11	6	11	6	9
YIR018W	YAP5	1150	1057	595	1366	859	861
YIR018C-A	YIR018C-A	261	227	167	342	213	244
YIR019C	YIR019C	217	318	93	389	148	107
YIR020C	YIR020C	899	783	441	1200	716	714
YIR020W-A	YIR020W-A	9	24	2	3	4	5
YIR020C-B	YIR020C-B	11	27	8	8	7	15
YIR021W	MRS1	1057	976	488	1138	708	910
YIR021W-A	YIR021W-A	0	0	0	0	2	1
YIR022W	SEC11	2050	1902	944	3416	1588	1597
YIR023W	DAL81	3899	2767	1163	6360	2625	3127
YIR023C-A	YIR023C-A	3	11	5	3	1	3
YIR024C	YIR024C	1718	980	709	3173	1960	2122
YIR025W	MND2	1728	1102	725	2739	1490	1481
YIR026C	YVH1	2995	2535	1706	3404	1772	2535
YIR027C	DAL1	152	174	110	129	66	94
YIR028W	DAL4	74	104	45	328	204	236
YIR029W	DAL2	619	535	375	722	440	508
YIR030C	DCG1	432	358	135	140	77	117
YIR030W-A	YIR030W-A	18	21	10	5	3	8
YIR031C	DAL7	1235	1160	784	1878	1075	1351
YIR032C	DAL3	557	582	310	493	316	349
YIR033W	MGA2	6822	4302	2670	9347	5028	6113
YIR034C	LYS1	2356	1768	895	3878	2184	2501
YIR035C	YIR035C	1394	1888	945	2407	1594	1757
YIR036C	IRC24	704	995	360	1488	888	921
YIR036W-A	YIR036W-A	5	7	11	8	6	6
YIR037W	HYR1	2257	2174	1062	2620	1831	2371
YIR038C	GTT1	2027	1301	738	3016	1937	2535
YIR039C	YPS6	541	434	176	1590	871	914
YIR041W	PAU15	64	77	23	255	123	112
YIR040C	YIR040C	8	16	1	2	2	5
YIR042C	YIR042C	501	534	296	830	406	428
YEL077C	YEL077C	2546	2744	2026	3026	2086	1926
YEL077W-A	YEL077W-A	9	22	17	25	19	21
YEL076C-A	YEL076C-A	0	0	0	0	0	0
YEL076C	YEL076C	0	0	0	0	2	0
YEL075W-A	YEL075W-A	1	1	0	2	0	2
YEL075C	YEL075C	20	16	16	23	12	28
YEL074W	YEL074W	27	21	9	32	7	18
YEL073C	YEL073C	138	127	110	388	237	180
YEL072W	RMD6	524	389	173	385	298	315
YEL071W	DLD3	14099	16340	6457	24563	11620	15795
YEL070W	DSF1	11	18	13	59	60	43
YEL069C	HXT13	27	31	11	14	10	17
YEL068C	YEL068C	627	495	225	443	247	319
YEL066W	HPA3	1862	2380	850	2160	1188	1262
YEL067C	YEL067C	16	38	20	37	29	17
YEL065W	SIT1	4237	5671	3088	7338	4122	5810
YEL064C	AVT2	754	653	368	876	622	713
YEL063C	CAN1	3174	2927	995	4043	2237	3007
YEL062W	NPR2	943	728	244	1454	710	880
YEL061C	CIN8	3879	3109	1641	4231	2416	2731
YEL060C	PRB1	7197	6933	2993	59338	39375	34732
YEL059C-A	SOM1	326	250	115	977	429	360
YEL059W	HHY1	24	15	8	36	25	21
YEL058W	PCM1	4593	5919	3398	15203	10820	11898
YEL057C	SDD1	121	100	41	170	102	97
YEL056W	HAT2	2839	2016	895	3755	1944	2050
YEL055C	POL5	10729	8743	7127	14723	9754	12525
YEL054C	RPL12A	17977	31933	12682	27183	15813	17944
YEL053W-A	YEL053W-A	8	10	7	8	3	8
YEL053C	MAK10	4826	3467	2259	6083	3785	4856
YEL052W	AFG1	2758	2474	1326	3743	2288	2867
YEL051W	VMA8	16694	11443	8504	16757	10297	12423
YEL050W-A	YEL050W-A	0	5	0	0	2	0
YEL050C	RML2	6623	4786	2520	12280	7402	8940
YEL048C	TCA17	975	821	642	525	432	676
YEL049W	PAU2	20	32	7	126	79	47
YEL047C	YEL047C	2646	3028	1886	8105	5269	5542
YEL046C	GLY1	18332	23570	11918	38301	21756	28721
YEL045C	YEL045C	11	10	9	5	5	2
YEL044W	IES6	895	1133	508	2856	1342	1494
YEL043W	YEL043W	4946	3446	1469	6053	2355	2773
YEL042W	GDA1	10832	9054	6381	10319	6403	8075
YEL041W	YEF1	443	391	171	489	401	372
YEL040W	UTR2	27390	20211	12928	34227	17681	27261
YEL039C	CYC7	624	447	150	3652	1997	1332
YEL038W	UTR4	720	1005	358	788	470	504
YEL037C	RAD23	13940	12001	8445	22969	15505	16824
YEL036C	ANP1	6481	5305	2748	10397	5724	6595
YEL035C	UTR5	7	14	2	7	9	5
YEL034W	HYP2	136315	134246	60387	151522	83383	100871
YEL034C-A	YEL034C-A	19	46	20	25	22	12
YEL033W	MTC7	3	6	1	2	6	2
YEL032W	MCM3	5527	5826	3364	11316	6689	7329
YEL032C-A	YEL032C-A	15	6	5	1	1	0
YEL031W	SPF1	22991	20373	11077	24006	14378	20015
YEL030W	ECM10	1095	854	526	899	493	551
YEL030C-A	YEL030C-A	21	42	7	7	8	14
YEL029C	BUD16	2037	1360	962	1835	1120	1470
YEL028W	YEL028W	315	254	127	351	192	238
YEL027W	VMA3	14653	15378	5918	11715	7538	11979
YEL026W	SNU13	316	591	180	155	158	214
YEL025C	YEL025C	4288	3697	2272	4351	2770	3468
YEL024W	RIP1	4877	5863	2298	9377	6747	8431
YEL023C	YEL023C	981	689	491	1007	631	692
YEL022W	GEA2	12806	9507	6081	16191	9524	11574
YEL021W	URA3	7570	4619	3775	7989	5050	6206
YEL020W-A	TIM9	598	740	185	1367	756	580
YEL020C-B	YEL020C-B	4	12	5	5	2	1
YEL020C	PXP1	795	759	451	1562	956	982
YEL019C	MMS21	352	240	92	552	235	271
YEL018W	EAF5	1649	1052	570	1931	1139	1057
YEL018C-A	YEL018C-A	5	6	0	9	5	4
YEL017C-A	PMP2	9054	7643	2400	8608	5152	5758
YEL017W	GTT3	2341	1671	671	4104	1886	1907
YEL016C	NPP2	1760	1325	875	1325	950	1101
YEL015W	EDC3	8511	5900	3376	11283	6084	6809
YEL014C	YEL014C	11	6	3	10	2	7
YEL013W	VAC8	7665	5734	4538	9908	7294	9219
YEL012W	UBC8	1736	873	474	4574	2175	1940
YEL011W	GLC3	921	763	361	4774	3515	4135
YEL010W	YEL010W	4	13	0	4	2	6
YEL009C-A	YEL009C-A	37	39	25	33	19	29
YEL009C	GCN4	13685	14041	9448	20951	16078	18530
YEL008C-A	YEL008C-A	52	56	21	102	32	46
YEL008W	YEL008W	10	27	5	60	37	23
YEL007W	MIT1	4950	3597	1404	7002	3139	2812
YEL006W	YEA6	1505	1374	617	1208	702	941
YEL005C	VAB2	653	494	262	616	314	362
YEL004W	YEA4	40	30	6	31	14	10
YEL003W	GIM4	939	954	488	1370	688	549
YEL002C	WBP1	8981	6418	3194	8758	5015	7047
YEL001C	IRC22	7148	5454	2450	8958	4887	5698
YER001W	MNN1	10550	11221	7033	14246	8811	11176
YER002W	NOP16	7810	5414	4083	18523	11454	7539
YER003C	PMI40	5389	4671	2234	10716	5715	6700
YER004W	FMP52	3199	2579	885	7464	3144	2791
YER005W	YND1	3042	2510	1338	2441	1459	1997
YER006W	NUG1	11005	10390	8408	24498	15613	18768
YER006C-A	YER006C-A	1	4	2	6	2	2
YER007W	PAC2	480	355	238	209	216	244
YER007C-A	TMA20	3456	2840	1632	3678	1948	2250
YER008C	SEC3	7383	4398	2969	15170	8526	9058
YER009W	NTF2	5135	5299	2383	5432	2880	3791
YER010C	YER010C	478	427	151	606	296	322
YER011W	TIR1	419	426	268	422	239	255
YER012W	PRE1	5525	4232	1817	7740	4234	5628
YER013W	PRP22	4018	2884	1897	5216	3058	3919
YER014W	HEM14	1817	1624	764	3540	2076	2157
YER014C-A	BUD25	17	27	5	11	5	10
YER015W	FAA2	927	614	430	880	505	740
YER016W	BIM1	2996	2863	1446	4736	2912	2846
YER017C	AFG3	123	110	68	204	127	158
YER018C	SPC25	174	283	40	426	154	120
YER019C-A	SBH2	645	820	220	1102	628	351
YER019W	ISC1	1306	1941	764	2624	1441	1350
YER020W	GPA2	2389	2441	944	5733	2884	2105
YER021W	RPN3	8586	6565	3969	12725	9259	12758
YER022W	SRB4	3624	2522	1833	5668	3585	4568
YER023W	PRO3	5175	6933	3946	6200	4728	4880
YER023C-A	YER023C-A	7	7	4	2	3	0
YER024W	YAT2	705	673	379	1416	821	1179
YER025W	GCD11	28660	24161	13250	40384	22226	25089
YER026C	CHO1	3191	2029	1157	6779	4354	6380
YER027C	GAL83	4507	3413	2032	6661	3606	4074
YER028C	MIG3	771	552	350	1579	912	994
YER029C	SMB1	2360	1602	1012	4028	2473	1875
YER030W	CHZ1	6335	2915	2182	10015	5134	3565
YER031C	YPT31	6135	5434	2817	10351	5449	4981
YER032W	FIR1	3861	2525	1153	5272	2201	2318
YER033C	ZRG8	2443	1500	888	5782	3203	2747
YER034W	YER034W	25	18	5	34	29	8
YER035W	EDC2	763	636	287	3371	1567	1045
YER036C	ARB1	31572	32663	18703	35169	20955	27203
YER037W	PHM8	3876	2280	1461	11587	7095	8703
YER038C	KRE29	763	606	367	466	305	424
YER039C	HVG1	102	56	31	94	81	92
YER038W-A	FMP49	152	101	56	201	93	98
YER039C-A	YER039C-A	15	11	4	23	23	5
YER040W	GLN3	1747	1325	479	2728	1026	1113
YER041W	YEN1	1656	1085	647	1768	915	1043
YER042W	MXR1	3010	2450	890	2256	1380	1524
YER043C	SAH1	40161	52587	23229	62329	33876	41395
YER044C	ERG28	1604	1795	546	1317	715	919
YER044C-A	MEI4	6	7	4	8	7	10
YER045C	ACA1	601	491	146	3545	1471	1259
YER046W	SPO73	266	288	156	670	382	342
YER046W-A	YER046W-A	3	4	2	1	2	0
YER047C	SAP1	2359	1897	1211	3758	2261	2247
YER048C	CAJ1	13387	9899	7956	20826	14500	15312
YER048W-A	ISD11	3439	2136	1166	4977	2739	3617
YER049W	TPA1	13945	10471	7627	14427	8318	11524
YER050C	RSM18	3383	2178	815	6629	2680	3027
YER051W	JHD1	1622	990	764	1910	1108	1180
YER052C	HOM3	9751	6612	3031	10247	5766	7577
YER053C	PIC2	1299	1345	617	5313	3749	3740
YER053C-A	YER053C-A	1679	573	203	6799	3418	1470
YER054C	GIP2	328	235	118	1230	771	574
YER055C	HIS1	155	249	142	219	204	211
YER056C	FCY2	11757	14468	6299	10667	8574	14441
YER056C-A	RPL34A	6117	8033	2463	10162	4965	4208
YER057C	HMF1	248	464	108	303	206	223
YER058W	PET117	300	265	104	600	523	231
YER059W	PCL6	1824	1147	497	3053	1333	1142
YER060W	FCY21	1153	1504	827	753	551	746
[truncated: 4,614 more rows]

## Sheet: counts Ribo_RFP data
name	gene	WT_1_RPF	WT_2_RPF	WT_3_RPF	def1_1_RPF	def1_2_RPF	def1_3_RPF
YAL069W	YAL069W	0	0	0	0	0	0
YAL068W-A	YAL068W-A	0	0	0	0	0	0
YAL068C	PAU8	1	0	0	0	0	1
YAL067W-A	YAL067W-A	0	0	0	0	0	0
YAL067C	SEO1	38	49	50	6	10	17
YAL066W	YAL066W	0	0	0	2	0	5
YAL065C	YAL065C	0	0	0	0	0	0
YAL064W-B	YAL064W-B	0	0	0	0	2	1
YAL064C-A	TDA8	0	0	0	0	0	2
YAL064W	YAL064W	0	0	0	0	0	2
YAL063C-A	YAL063C-A	0	1	0	0	2	0
YAL063C	FLO9	0	7	4	2	5	18
YAL062W	GDH3	24	44	22	35	65	48
YAL061W	BDH2	25	22	19	30	60	31
YAL060W	BDH1	615	571	381	285	397	214
YAL059C-A	YAL059C-A	0	0	0	0	0	3
YAL059W	ECM1	236	559	606	83	91	86
YAL058W	CNE1	127	119	141	27	47	31
YAL056C-A	YAL056C-A	4	0	0	0	0	1
YAL056W	GPB2	95	141	148	53	83	34
YAL055W	PEX22	30	46	36	9	22	17
YAL054C	ACS1	4	7	10	23	38	21
YAL053W	FLC2	595	977	927	733	836	690
YAL051W	OAF1	170	285	291	128	131	129
YAL049C	AIM2	395	641	529	209	219	136
YAL048C	GEM1	103	87	98	47	51	39
YAL047W-A	YAL047W-A	0	1	0	1	0	2
YAL047C	SPC72	83	116	121	37	48	50
YAL046C	BOL3	83	208	166	78	81	53
YAL045C	YAL045C	0	0	0	0	0	0
YAL044W-A	BOL1	120	284	197	53	68	57
YAL044C	GCV3	861	720	559	748	771	455
YAL043C	PTA1	392	567	604	240	292	225
YAL042C-A	YAL042C-A	0	2	0	0	0	7
YAL042W	ERV46	1018	1390	1362	446	472	380
YAL041W	CDC24	262	343	332	186	206	158
YAL040C	CLN3	146	223	243	51	91	43
YAL039C	CYC3	311	603	545	531	606	495
YAL038W	CDC19	99001	149717	149256	47025	58164	41266
YAL037C-B	YAL037C-B	0	1	1	2	3	8
YAL037C-A	YAL037C-A	0	0	0	0	0	1
YAL037W	YAL037W	3	6	6	3	7	5
YAL036C	RBG1	931	1392	1694	467	550	388
YAL035W	FUN12	3841	3893	4618	3013	3470	1636
YAL034C-B	YAL034C-B	0	0	0	1	0	3
YAL034W-A	MTW1	71	126	105	28	37	19
YAL034C	FUN19	6	12	10	46	39	29
YAL033W	POP5	136	191	197	82	75	51
YAL032C	PRP45	117	277	201	41	56	39
YAL031W-A	YAL031W-A	0	0	0	3	2	2
YAL031C	GIP4	131	168	142	61	78	31
YAL030W	SNC1	161	273	229	97	127	89
YAL029C	MYO4	246	299	301	218	234	155
YAL028W	FRT2	9	40	21	10	16	19
YAL027W	SAW1	52	53	43	14	27	22
YAL026C-A	YAL026C-A	0	0	0	3	0	1
YAL026C	DRS2	336	497	525	153	227	204
YAL025C	MAK16	507	796	833	193	246	170
YAL024C	LTE1	162	255	222	84	96	76
YAL023C	PMT2	1695	2271	2340	678	811	570
YAL022C	FUN26	253	407	399	137	163	111
YAL021C	CCR4	889	1545	1408	373	471	288
YAL020C	ATS1	66	111	109	40	38	15
YAL019W-A	YAL019W-A	0	1	0	0	1	3
YAL019W	FUN30	498	797	966	315	398	276
YAL018C	LDS1	3	0	1	3	2	7
YAL017W	PSK1	307	400	344	122	151	109
YAL016C-B	YAL016C-B	0	0	1	1	0	6
YAL016C-A	YAL016C-A	0	2	0	0	0	2
YAL016W	TPD3	1555	2749	2570	1365	1633	1453
YAL015C	NTG1	79	82	83	41	55	43
YAL014C	SYN8	80	194	220	40	35	45
YAL013W	DEP1	306	662	635	129	183	142
YAL012W	CYS3	9038	14445	11543	5137	6945	5223
YAL011W	SWC3	59	107	101	24	35	78
YAL010C	MDM10	91	81	85	75	48	47
YAL009W	SPO7	55	74	61	15	18	11
YAL008W	FUN14	154	218	148	79	65	61
YAL007C	ERP2	735	840	829	274	252	140
YAL005C	SSA1	8224	11111	5136	7250	8318	6581
YAL004W	YAL004W	2	0	0	0	0	1
YAL003W	EFB1	21217	51963	41208	6527	7856	7279
YAL002W	VPS8	101	111	103	40	47	31
YAL001C	TFC3	151	197	145	134	168	71
YAR002W	NUP60	706	1280	936	345	429	281
YAR002C-A	ERP1	1044	1144	1085	453	512	249
YAR003W	SWD1	105	118	130	71	53	34
YAR007C	RFA1	778	1596	1544	582	656	449
YAR008W	SEN34	55	120	134	42	62	32
YAR014C	BUD14	450	692	722	218	245	163
YAR015W	ADE1	519	583	599	463	471	313
YAR018C	KIN3	131	183	130	107	136	56
YAR019C	CDC15	64	68	102	55	107	39
YAR019W-A	YAR019W-A	0	0	0	1	0	1
YAR020C	PAU7	0	1	3	1	3	9
YAR023C	YAR023C	0	4	0	1	2	4
YAR027W	UIP3	186	343	283	184	180	158
YAR028W	YAR028W	76	131	131	101	86	50
YAR029W	YAR029W	0	0	2	0	1	0
YAR030C	YAR030C	1	0	0	1	0	1
YAR031W	PRM9	27	36	27	1	3	3
YAR033W	MST28	12	35	13	5	4	3
YAR035W	YAT1	3	29	18	35	64	58
YAR035C-A	YAR035C-A	0	0	0	0	0	1
YAR042W	SWH1	233	363	349	271	320	240
YAR047C	YAR047C	0	0	0	0	0	1
YAR050W	FLO1	1	4	10	5	5	12
YAR053W	YAR053W	0	0	1	0	0	0
YAR060C	YAR060C	0	0	0	0	0	0
YAR064W	YAR064W	0	0	0	1	0	0
YAR066W	YAR066W	0	0	0	0	0	0
YAR068W	YAR068W	0	0	0	1	0	1
YAR069C	YAR069C	0	1	0	0	0	0
YAR070C	YAR070C	0	0	0	0	0	0
YAR071W	PHO11	74	160	312	24	31	26
YAR073W	IMD1	24	42	40	23	17	19
YAR075W	YAR075W	5	2	11	4	5	7
YBL113C	YBL113C	1	3	2	2	2	0
YBL113W-A	YBL113W-A	0	0	0	0	0	0
YBL112C	YBL112C	0	0	0	0	0	0
YBL111C	YBL111C	0	0	0	0	1	0
YBL109W	YBL109W	0	2	0	0	0	1
YBL108C-A	PAU9	0	0	0	0	0	0
YBL108W	YBL108W	0	2	0	0	0	0
YBL107W-A	YBL107W-A	0	0	0	0	0	0
YBL107C	MIX23	104	192	141	134	145	119
YBL106C	SRO77	15	45	50	20	16	39
YBL105C	PKC1	286	379	387	356	431	227
YBL104C	SEA4	99	182	217	114	185	138
YBL103C	RTG3	144	282	303	141	138	115
YBL102W	SFT2	259	438	410	324	336	211
YBL101C	ECM21	197	279	234	452	441	296
YBL100W-C	YBL100W-C	0	1	0	4	1	2
YBL100C	YBL100C	0	0	0	0	0	0
YBL099W	ATP1	5267	9607	8256	6457	8668	6215
YBL098W	BNA4	202	260	245	108	161	151
YBL097W	BRN1	121	221	239	222	309	287
YBL096C	YBL096C	0	0	2	0	0	2
YBL095W	MRX3	68	106	69	20	23	18
YBL094C	YBL094C	0	0	0	3	0	1
YBL093C	ROX3	239	359	334	235	244	174
YBL092W	RPL32	15327	39835	27793	14632	15443	12933
YBL091C-A	SCS22	39	51	43	32	35	38
YBL091C	MAP2	744	1196	1032	822	844	681
YBL090W	MRP21	254	392	320	346	376	262
YBL089W	AVT5	92	119	109	77	97	66
YBL088C	TEL1	48	44	67	35	56	84
YBL087C	RPL23A	5176	9238	8003	3846	4176	2831
YBL086C	YBL086C	57	180	141	95	124	77
YBL085W	BOI1	472	722	660	423	533	346
YBL084C	CDC27	109	100	120	74	82	61
YBL083C	YBL083C	0	0	0	0	0	1
YBL082C	ALG3	155	231	270	127	136	102
YBL081W	YBL081W	203	401	373	190	206	213
YBL080C	PET112	51	62	52	75	91	82
YBL079W	NUP170	450	871	797	539	690	509
YBL078C	ATG8	65	148	130	336	354	264
YBL077W	YBL077W	0	1	0	0	0	1
YBL076C	ILS1	3813	5119	6104	4571	5344	3318
YBL075C	SSA3	16	30	21	92	170	132
YBL074C	AAR2	23	61	62	45	51	28
YBL073W	YBL073W	0	3	0	0	1	3
YBL072C	RPS8A	4335	10086	7607	4318	4793	3691
YBL071C-B	YBL071C-B	1	0	0	0	0	1
YBL071W-A	KTI11	248	414	346	136	160	141
YBL071C	YBL071C	2	1	0	0	2	1
YBL070C	YBL070C	0	12	1	0	2	41
YBL069W	AST1	220	536	417	267	282	222
YBL068W-A	YBL068W-A	0	0	0	0	0	0
YBL068W	PRS4	576	947	1037	478	589	415
YBL067C	UBP13	232	204	226	167	204	128
YBL066C	SEF1	91	171	192	98	185	129
YBL065W	YBL065W	1	1	1	0	3	6
YBL064C	PRX1	222	309	206	828	1205	671
YBL063W	KIP1	77	95	116	125	133	102
YBL062W	YBL062W	0	0	0	0	0	2
YBL061C	SKT5	367	577	623	713	793	518
YBL060W	YEL1	96	143	137	46	66	56
YBL059C-A	CMC2	132	197	162	125	144	88
YBL059W	YBL059W	49	57	61	81	76	72
YBL058W	SHP1	1054	1966	1777	1243	1525	1294
YBL057C	PTH2	180	259	233	181	185	117
YBL056W	PTC3	582	695	776	727	832	553
YBL055C	YBL055C	131	240	261	213	215	141
YBL054W	TOD6	263	498	608	185	250	337
YBL053W	YBL053W	0	0	0	0	0	1
YBL052C	SAS3	41	64	63	32	51	34
YBL051C	PIN4	588	1272	1114	886	858	709
YBL050W	SEC17	606	911	839	801	800	523
YBL049W	MOH1	12	8	6	56	88	65
YBL048W	RRT1	0	1	1	1	3	2
YBL047C	EDE1	2512	4372	4318	3380	4500	3712
YBL046W	PSY4	101	213	217	250	254	191
YBL045C	COR1	1495	2865	2183	2534	3262	2094
YBL044W	YBL044W	0	0	0	0	0	2
YBL043W	ECM13	5	11	3	53	94	44
YBL042C	FUI1	631	1234	1053	693	877	889
YBL041W	PRE7	1049	2009	1560	1601	1814	1450
YBL040C	ERD2	480	520	455	527	544	263
YBL039W-B	YBL039W-B	20	28	35	25	27	195
YBL039C	URA7	1968	2771	4040	1782	2179	1413
YBL039C-A	YBL039C-A	0	0	0	0	0	0
YBL038W	MRPL16	277	498	353	331	397	250
YBL037W	APL3	259	333	340	306	396	248
YBL036C	YBL036C	450	668	730	478	546	375
YBL035C	POL12	338	730	660	474	560	452
YBL034C	STU1	172	307	318	275	336	271
YBL033C	RIB1	243	451	346	384	409	285
YBL032W	HEK2	632	1155	966	537	679	479
YBL031W	SHE1	44	91	53	38	46	39
YBL030C	PET9	4420	7558	6708	4700	5989	4174
YBL029C-A	YBL029C-A	73	151	79	114	113	72
YBL029W	YBL029W	52	71	59	44	57	49
YBL028C	YBL028C	320	602	479	227	251	193
YBL027W	RPL19B	10421	24238	19959	8559	9131	7492
YBL026W	LSM2	314	417	398	237	292	143
YBL025W	RRN10	65	156	148	55	48	36
YBL024W	NCL1	1266	1773	2109	1624	1766	1167
YBL023C	MCM2	436	491	463	591	661	340
YBL022C	PIM1	1151	1599	1650	1013	1284	983
YBL021C	HAP3	55	156	122	87	83	74
YBL020W	RFT1	182	153	184	110	138	108
YBL019W	APN2	47	68	44	33	53	95
YBL018C	POP8	114	348	394	165	275	505
YBL017C	PEP1	820	1085	1229	605	780	465
YBL016W	FUS3	389	602	525	439	573	342
YBL015W	ACH1	213	322	321	398	623	427
YBL014C	RRN6	55	65	83	33	44	34
YBL013W	FMT1	38	15	52	27	46	19
YBL012C	YBL012C	0	1	0	0	2	3
YBL011W	SCT1	307	358	396	261	296	212
YBL010C	YBL010C	107	209	159	144	157	86
YBL009W	ALK2	342	466	589	248	267	273
YBL008W-A	YBL008W-A	1	1	0	1	0	1
YBL008W	HIR1	163	170	182	140	161	129
YBL007C	SLA1	1624	2792	2610	2313	2973	1960
YBL006C	LDB7	151	300	263	199	198	134
YBL006W-A	YBL006W-A	0	0	0	2	0	1
YBL005W	PDR3	74	88	87	69	59	39
YBL004W	UTP20	879	976	1974	740	1030	734
YBL003C	HTA2	1960	4506	2944	1965	2223	1256
YBL002W	HTB2	2414	6410	4017	2664	3218	2362
YBL001C	ECM15	411	691	519	412	465	285
YBR001C	NTH2	207	238	187	320	376	209
YBR002C	RER2	127	162	198	132	142	88
YBR003W	COQ1	217	303	220	204	266	152
YBR004C	GPI18	135	128	134	75	79	54
YBR005W	RCR1	101	85	91	142	173	112
YBR006W	UGA2	48	66	66	144	157	139
YBR007C	DSF2	138	203	195	186	231	122
YBR008C	FLR1	19	18	18	214	361	209
YBR009C	HHF1	1867	4347	2826	2773	2826	1877
YBR010W	HHT1	2629	6281	4093	3464	3690	2831
YBR011C	IPP1	7520	10647	10302	5166	6075	3582
YBR012C	YBR012C	0	0	0	0	0	6
YBR013C	YBR013C	3	1	0	1	0	6
YBR014C	GRX7	265	400	344	270	299	166
YBR015C	MNN2	976	1266	1237	575	866	436
YBR016W	YBR016W	488	1003	779	690	664	519
YBR017C	KAP104	570	728	869	1091	1262	666
YBR018C	GAL7	2	1	1	5	4	9
YBR019C	GAL10	6	1	2	5	6	10
YBR020W	GAL1	5	0	3	3	1	7
YBR021W	FUR4	135	175	193	155	199	195
YBR022W	POA1	117	237	164	110	112	78
YBR023C	CHS3	622	706	810	992	1271	722
YBR024W	SCO2	97	100	80	131	118	61
YBR025C	OLA1	6592	9722	9699	6381	7502	4655
YBR026C	ETR1	458	705	502	593	770	622
YBR027C	YBR027C	0	2	1	0	1	0
YBR028C	YPK3	193	294	274	117	140	115
YBR029C	CDS1	522	669	693	603	725	535
YBR030W	RKM3	68	148	132	65	60	60
YBR031W	RPL4A	4457	8754	7309	2490	2926	2363
YBR032W	YBR032W	0	0	2	0	0	3
YBR033W	EDS1	3	18	12	31	48	48
YBR034C	HMT1	792	1450	1603	631	851	694
YBR035C	PDX3	756	1108	925	820	1029	582
YBR036C	CSG2	622	643	730	713	888	544
YBR037C	SCO1	149	232	144	182	221	130
YBR038W	CHS2	786	1103	1293	1222	1561	917
YBR039W	ATP3	1490	2910	2283	1956	2742	1910
YBR040W	FIG1	2	3	3	2	0	4
YBR041W	FAT1	295	449	373	234	413	255
YBR042C	CST26	143	198	183	111	120	71
YBR043C	QDR3	41	42	72	36	53	54
YBR044C	TCM62	74	80	76	75	81	37
YBR045C	GIP1	33	56	37	21	19	26
YBR046C	ZTA1	208	248	194	344	451	252
YBR047W	FMP23	17	37	42	47	42	41
YBR048W	RPS11B	7546	16490	12639	4766	5611	4101
YBR049C	REB1	1076	2004	1753	909	1014	774
YBR050C	REG2	7	12	9	5	11	11
YBR051W	YBR051W	0	0	0	2	0	3
YBR052C	RFS1	434	555	458	549	705	442
YBR053C	YBR053C	216	283	197	520	625	329
YBR054W	YRO2	429	548	293	1061	1708	1070
YBR055C	PRP6	164	208	238	99	136	110
YBR056W	YBR056W	309	358	314	723	810	483
YBR056W-A	YBR056W-A	37	72	46	281	301	302
YBR056C-B	YBR056C-B	2	1	1	2	0	0
YBR057C	MUM2	216	329	306	141	152	96
YBR058C	UBP14	456	658	656	622	731	503
YBR058C-A	TSC3	255	477	342	235	231	158
YBR059C	AKL1	450	842	808	968	1198	763
YBR060C	ORC2	138	355	304	146	137	113
YBR061C	TRM7	312	452	483	217	255	150
YBR062C	YBR062C	134	216	139	145	167	111
YBR063C	YBR063C	0	2	4	5	2	8
YBR064W	YBR064W	1	2	3	2	3	12
YBR065C	ECM2	105	150	134	106	143	73
YBR066C	NRG2	100	135	114	60	74	50
YBR067C	TIP1	1084	1489	1846	528	623	383
YBR068C	BAP2	1285	1870	1947	1874	2345	1374
YBR069C	TAT1	802	1524	1447	1010	1234	924
YBR070C	ALG14	54	127	120	101	120	67
YBR071W	YBR071W	372	794	580	790	971	612
YBR072W	HSP26	47	40	56	773	1205	737
YBR072C-A	YBR072C-A	0	0	0	0	0	0
YBR073W	RDH54	401	619	586	644	712	419
YBR074W	YBR074W	438	638	601	318	354	295
YBR076W	ECM8	1	2	0	3	4	25
YBR076C-A	YBR076C-A	0	1	0	19	15	13
YBR077C	SLM4	160	316	288	195	196	133
YBR078W	ECM33	16840	26956	26643	18286	23183	17419
YBR079C	RPG1	2918	3975	4848	3642	4557	2785
YBR080C	SEC18	885	1469	1422	1637	2049	1267
YBR081C	SPT7	218	331	363	298	366	230
YBR082C	UBC4	3010	5430	4277	2838	3306	2305
YBR083W	TEC1	644	922	1023	540	913	357
YBR084W	MIS1	1843	2569	3110	1123	1311	829
YBR084C-A	RPL19A	7810	16603	13847	6850	7173	4752
YBR085W	AAC3	51	82	66	34	26	55
YBR085C-A	YBR085C-A	469	582	385	860	1108	746
YBR086C	IST2	971	1297	1389	815	1110	796
YBR087W	RFC5	352	473	426	391	403	275
YBR088C	POL30	764	1449	1490	805	892	516
YBR089W	YBR089W	0	0	1	1	3	7
YBR089C-A	NHP6B	237	458	357	245	282	231
YBR090C	YBR090C	4	1	2	6	0	4
YBR091C	TIM12	92	209	169	119	151	120
YBR092C	PHO3	1052	1412	1632	907	1141	648
YBR093C	PHO5	702	1933	4172	1413	1402	764
YBR094W	PBY1	303	287	324	389	469	275
YBR095C	RXT2	154	202	253	219	245	177
YBR096W	YBR096W	561	599	554	728	951	458
YBR097W	VPS15	191	201	248	192	520	253
YBR098W	MMS4	66	102	112	64	57	68
YBR099C	YBR099C	0	0	0	0	0	1
YBR101C	FES1	901	1597	1501	1188	1066	639
YBR102C	EXO84	233	327	372	335	454	271
YBR103W	SIF2	188	224	253	252	318	158
YBR103C-A	YBR103C-A	0	0	0	0	0	0
YBR104W	YMC2	234	422	430	152	150	159
YBR105C	VID24	94	191	109	194	268	191
YBR106W	PHO88	3755	5344	5140	2168	2709	1677
YBR107C	IML3	15	24	24	17	12	9
YBR108W	AIM3	317	571	451	389	505	438
YBR109C	CMD1	1870	3496	3154	2078	2128	1682
YBR109W-A	YBR109W-A	0	6	2	2	3	5
YBR110W	ALG1	236	289	239	244	293	184
YBR111C	YSA1	621	966	763	515	509	376
YBR111W-A	SUS1	156	215	139	95	107	72
YBR112C	CYC8	933	1849	2097	1195	1660	1215
YBR113W	YBR113W	0	0	0	1	1	2
YBR114W	RAD16	111	158	125	163	209	184
YBR115C	LYS2	1588	2362	2328	1786	2069	1520
YBR116C	YBR116C	0	0	0	0	0	0
YBR117C	TKL2	99	683	336	137	260	2873
YBR118W	TEF2	7425	9649	8854	7710	6764	4104
YBR119W	MUD1	90	194	183	113	126	78
YBR120C	CBP6	155	251	190	267	235	147
YBR121C	GRS1	3195	4309	5009	3293	3794	2237
YBR121C-A	YBR121C-A	0	0	0	0	0	0
YBR122C	MRPL36	253	483	337	345	392	253
YBR123C	TFC1	230	375	394	214	281	210
YBR124W	YBR124W	0	0	0	3	1	2
YBR125C	PTC4	169	177	178	145	156	97
YBR126C	TPS1	1384	2282	1842	3436	3887	2865
YBR126W-A	MEO1	96	168	89	104	97	81
YBR126W-B	YBR126W-B	0	0	0	0	0	0
YBR127C	VMA2	5011	7835	7777	5178	6705	4232
YBR128C	ATG14	7	19	13	17	15	30
YBR129C	OPY1	89	143	182	88	89	36
YBR130C	SHE3	342	525	513	351	395	292
YBR131W	CCZ1	55	81	78	59	72	45
YBR131C-A	YBR131C-A	0	0	0	0	0	0
YBR132C	AGP2	101	130	105	215	257	123
YBR133C	HSL7	216	217	234	173	190	149
YBR134W	YBR134W	0	0	0	0	0	4
YBR135W	CKS1	315	449	397	317	354	225
YBR136W	MEC1	87	140	135	101	109	114
YBR137W	YBR137W	299	530	394	278	292	252
YBR138C	YBR138C	141	170	162	209	300	137
YBR139W	YBR139W	532	659	554	931	1209	645
YBR140C	IRA1	232	381	413	174	490	330
YBR141C	BMT2	93	179	144	73	102	67
YBR141W-A	YBR141W-A	3	2	1	3	3	0
YBR142W	MAK5	426	568	685	551	745	414
YBR143C	SUP45	2796	3900	4438	2597	3095	1696
YBR144C	YBR144C	1	16	3	6	14	433
YBR145W	ADH5	117	160	162	106	119	161
YBR146W	MRPS9	345	529	405	512	545	354
YBR147W	RTC2	10	14	14	14	19	25
YBR148W	YSW1	13	37	37	14	12	18
YBR149W	ARA1	785	1189	865	1702	2068	1282
YBR150C	TBS1	78	116	124	70	105	71
YBR151W	APD1	331	490	457	279	339	234
YBR152W	SPP381	52	98	89	30	40	33
YBR153W	RIB7	63	151	98	70	99	64
YBR154C	RPB5	1285	2261	2176	921	1061	746
YBR155W	CNS1	440	650	873	252	324	251
YBR156C	SLI15	115	154	161	123	127	75
YBR157C	ICS2	85	207	277	35	55	46
YBR158W	AMN1	498	973	925	522	579	438
YBR159W	IFA38	823	1085	1045	652	700	404
YBR160W	CDC28	411	613	568	765	824	505
YBR161W	CSH1	91	184	201	183	183	77
YBR162C	TOS1	4502	6243	7681	4973	6161	3881
YBR162W-A	YSY6	459	915	816	551	538	469
YBR163W	EXO5	39	53	59	19	31	54
YBR164C	ARL1	485	699	735	481	560	301
YBR165W	UBS1	88	159	161	124	136	106
YBR166C	TYR1	394	468	533	550	675	321
YBR167C	POP7	40	112	89	108	101	55
YBR168W	PEX32	30	47	30	22	23	22
YBR169C	SSE2	196	196	161	439	682	414
YBR170C	NPL4	347	507	468	701	832	469
YBR171W	SEC66	617	950	880	505	563	405
YBR172C	SMY2	617	995	973	422	488	432
YBR173C	UMP1	523	1059	874	969	972	790
YBR174C	YBR174C	0	0	0	1	0	1
YBR175W	SWD3	98	132	127	94	81	60
YBR176W	ECM31	143	180	174	133	135	90
YBR177C	EHT1	600	781	722	1403	1711	969
YBR178W	YBR178W	22	15	6	16	14	84
YBR179C	FZO1	194	256	312	302	412	250
YBR180W	DTR1	5	2	10	2	6	3
YBR181C	RPS6B	1863	3017	2735	1661	1564	1029
YBR182C	SMP1	62	40	32	167	187	122
YBR182C-A	YBR182C-A	0	0	0	0	0	1
YBR183W	YPC1	58	74	66	193	229	163
YBR184W	YBR184W	15	28	19	8	8	14
YBR185C	MBA1	133	184	189	172	208	140
YBR186W	PCH2	319	166	90	387	633	307
YBR187W	GDT1	441	795	871	357	348	297
YBR188C	NTC20	98	158	151	139	137	117
YBR189W	RPS9B	15607	30537	27167	10873	12216	8166
YBR190W	YBR190W	0	4	4	5	9	9
YBR191W	RPL21A	7915	14965	12593	5958	6622	4956
YBR191W-A	YBR191W-A	2	18	14	13	12	6
YBR192W	RIM2	204	292	218	196	242	155
YBR193C	MED8	122	192	221	98	112	87
YBR194W	AIM4	47	104	108	88	83	82
YBR195C	MSI1	131	203	189	101	113	235
YBR196C	PGI1	14594	18611	20181	25292	28599	16970
YBR196C-A	YBR196C-A	0	0	2	0	1	0
YBR196C-B	YBR196C-B	0	0	0	0	0	0
YBR197C	YBR197C	75	193	127	79	81	45
YBR198C	TAF5	614	873	1006	838	914	566
YBR199W	KTR4	363	428	472	455	517	315
YBR200W	BEM1	210	293	310	244	263	195
YBR200W-A	YBR200W-A	0	0	1	0	0	2
YBR201W	DER1	58	72	46	64	68	61
YBR201C-A	YBR201C-A	5	20	20	10	26	6
YBR202W	MCM7	441	702	822	699	905	532
YBR203W	COS111	74	102	87	203	289	175
YBR204C	LDH1	128	121	115	98	129	87
YBR205W	KTR3	606	763	805	340	369	181
YBR206W	YBR206W	1	0	0	0	1	1
YBR207W	FTH1	287	360	379	286	383	261
YBR208C	DUR1	132	220	208	350	447	227
YBR209W	YBR209W	0	0	0	0	0	46
YBR210W	ERV15	107	120	151	100	115	57
YBR211C	AME1	53	106	110	73	53	49
YBR212W	NGR1	479	1107	842	657	738	514
YBR213W	MET8	104	152	144	55	77	56
YBR214W	SDS24	289	466	312	821	950	665
YBR215W	HPC2	198	427	343	227	266	228
YBR216C	YBP1	45	78	92	53	74	61
YBR217W	ATG12	26	43	48	14	23	20
YBR218C	PYC2	1045	1312	1450	911	1409	812
YBR219C	YBR219C	0	0	0	0	0	0
YBR220C	YBR220C	128	105	156	76	68	42
YBR221C	PDB1	2222	2855	2843	1610	1872	1167
YBR221W-A	YBR221W-A	0	0	0	0	0	1
YBR222C	PCS60	386	588	511	601	722	484
YBR223C	TDP1	26	38	37	43	38	26
YBR223W-A	YBR223W-A	0	0	0	0	0	0
YBR224W	YBR224W	3	1	0	0	2	5
YBR225W	YBR225W	113	200	198	219	248	152
YBR226C	YBR226C	0	5	0	0	5	2
YBR227C	MCX1	280	382	377	170	258	1049
YBR228W	SLX1	18	33	51	12	30	51
YBR229C	ROT2	870	524	943	728	1674	317
YBR230C	OM14	332	564	315	350	399	305
YBR230W-A	YBR230W-A	69	122	82	175	227	123
YBR231C	SWC5	127	253	243	129	137	110
YBR232C	YBR232C	0	0	0	0	0	6
YBR233W	PBP2	238	455	380	251	370	220
YBR233W-A	DAD3	79	107	97	35	47	35
YBR234C	ARC40	848	1076	1166	1353	1564	960
YBR235W	VHC1	116	205	170	122	196	136
YBR236C	ABD1	255	362	350	309	415	208
YBR237W	PRP5	58	81	100	83	112	88
YBR238C	YBR238C	222	432	362	178	256	192
YBR239C	ERT1	58	99	92	58	74	55
YBR240C	THI2	5	17	3	14	12	5
YBR241C	YBR241C	68	79	67	129	182	123
YBR242W	YBR242W	291	425	513	168	208	181
YBR243C	ALG7	281	311	308	179	227	126
YBR244W	GPX2	83	145	150	111	84	80
YBR245C	ISW1	782	1273	1266	1347	1361	963
YBR246W	RRT2	160	261	260	174	173	106
YBR247C	ENP1	716	959	1182	541	683	412
YBR248C	HIS7	695	648	833	816	979	608
YBR249C	ARO4	4353	7966	7997	3915	4795	3058
YBR250W	SPO23	11	7	2	1	5	5
YBR251W	MRPS5	201	277	274	427	428	293
YBR252W	DUT1	525	1093	927	278	289	244
YBR253W	SRB6	99	98	106	47	63	34
YBR254C	TRS20	127	174	155	96	102	65
YBR255W	MTC4	67	167	160	88	93	156
YBR255C-A	RCF3	64	67	66	50	72	26
YBR256C	RIB5	203	266	262	394	343	182
YBR257W	POP4	161	194	204	136	136	82
YBR258C	SHG1	39	104	81	67	92	75
YBR259W	YBR259W	37	45	33	28	42	31
YBR260C	RGD1	204	389	321	261	282	239
YBR261C	TAE1	374	562	537	321	324	230
YBR262C	YBR262C	90	139	128	117	192	79
YBR263W	SHM1	1782	2794	2878	1328	1537	1114
YBR264C	YPT10	106	196	151	139	134	73
YBR265W	TSC10	345	466	494	282	361	181
YBR267W	REI1	472	1325	1128	201	283	385
YBR266C	SLM6	0	0	1	0	3	1
YBR268W	MRPL37	179	227	201	240	208	176
YBR269C	SDH8	148	263	192	256	255	180
YBR270C	BIT2	9	2	8	7	23	16
YBR271W	EFM2	127	202	231	118	122	85
YBR272C	HSM3	230	207	204	205	233	241
YBR273C	UBX7	381	552	568	480	492	395
YBR274W	CHK1	92	112	125	67	88	81
YBR275C	RIF1	153	320	356	190	271	210
YBR276C	PPS1	75	58	73	77	92	57
YBR277C	YBR277C	0	0	0	0	0	2
YBR278W	DPB3	73	109	94	90	126	86
YBR279W	PAF1	374	722	600	706	768	550
YBR280C	SAF1	40	74	67	146	149	99
YBR281C	DUG2	332	430	332	425	435	291
YBR282W	MRPL27	242	535	407	440	422	362
YBR283C	SSH1	1775	2187	2294	1123	1402	785
YBR284W	YBR284W	9	13	20	17	16	14
YBR285W	YBR285W	2	14	4	10	13	9
YBR286W	APE3	4711	7459	7540	3624	4721	3278
YBR287W	YBR287W	442	595	636	563	635	380
YBR288C	APM3	315	335	395	463	533	283
YBR289W	SNF5	267	488	461	237	319	238
YBR290W	BSD2	240	379	362	408	379	319
YBR291C	CTP1	116	94	97	87	106	52
YBR292C	YBR292C	0	0	0	0	0	2
YBR293W	VBA2	18	15	32	14	24	20
YBR294W	SUL1	6	16	13	11	12	31
YBR295W	PCA1	45	70	74	166	179	147
YBR296C	PHO89	64	214	425	225	200	128
YBR296C-A	YBR296C-A	0	0	0	0	0	0
YBR297W	MAL33	35	98	93	95	112	48
YBR298C	MAL31	6	4	0	4	10	8
YBR298C-A	YBR298C-A	0	0	0	0	0	1
YBR299W	MAL32	1	4	6	7	7	0
YBR300C	YBR300C	0	3	0	0	0	1
YBR301W	PAU24	0	1	0	1	3	2
YBR302C	COS2	14	16	13	24	38	30
YCL076W	YCL076W	0	2	0	1	0	0
YCL073C	GEX1	0	1	1	2	1	8
YCL069W	VBA3	1	0	4	3	0	7
YCL068C	YCL068C	0	0	1	0	1	0
YCL067C	HMLALPHA2	0	0	0	0	0	0
YCL066W	HMLALPHA1	0	0	0	0	0	0
YCL065W	YCL065W	0	0	0	0	1	0
YCL064C	CHA1	306	307	246	779	660	400
YCL063W	VAC17	258	295	296	81	105	63
YCL061C	MRC1	299	653	613	159	158	159
YCL059C	KRR1	662	1393	1552	303	378	246
YCL058C	FYV5	0	3	0	1	2	2
YCL058W-A	ADF1	122	256	180	40	44	52
YCL057C-A	YCL057C-A	500	820	703	311	352	259
YCL057W	PRD1	1005	1200	1105	565	704	501
YCL056C	PEX34	23	42	45	13	16	12
YCL055W	KAR4	194	362	295	142	214	143
YCL054W-A	RDT1	35	59	54	13	19	15
YCL054W	SPB1	971	1374	1762	637	786	598
YCL052C	PBN1	179	190	177	102	125	64
YCL051W	LRE1	114	277	246	91	90	75
YCL050C	APA1	2525	4209	3781	985	1022	650
YCL049C	YCL049C	86	92	104	181	217	124
YCL048W-A	YCL048W-A	2	5	1	4	9	7
YCL048W	SPS22	3	1	12	9	8	14
YCL047C	POF1	146	117	137	37	47	20
YCL045C	EMC1	1222	1544	1593	489	596	345
YCL046W	YCL046W	0	0	0	1	1	1
YCL044C	MGR1	263	353	385	216	217	160
YCL043C	PDI1	6748	8814	8400	3877	4780	3624
YCL041C	YCL041C	2	4	3	2	2	7
YCL042W	YCL042W	0	5	1	1	0	1
YCL040W	GLK1	1109	1515	1011	3595	4854	2730
YCL039W	GID7	122	143	162	106	119	81
YCL038C	ATG22	69	73	81	84	109	54
YCL037C	SRO9	2267	4986	4138	1367	1590	1439
YCL036W	GFD2	91	182	149	21	44	47
YCL035C	GRX1	726	1142	777	582	715	469
YCL034W	LSB5	337	557	487	266	273	218
YCL033C	MXR2	182	215	205	98	96	51
YCL032W	STE50	135	161	187	56	77	61
YCL031C	RRP7	457	732	635	245	313	204
YCL030C	HIS4	1305	1249	1133	1449	1583	1059
YCL029C	BIK1	153	268	290	72	89	74
YCL028W	RNQ1	1459	3037	2583	926	1146	969
YCL027W	FUS1	36	63	85	8	7	17
YCL026C-B	HBN1	80	146	105	178	262	229
YCL026C-A	FRM2	9	34	29	17	29	21
YCL025C	AGP1	737	1393	1200	391	489	341
YCL023C	YCL023C	0	3	0	0	0	2
YCL024W	KCC4	112	267	210	100	117	158
YCL022C	YCL022C	1	12	4	0	3	6
YCL021W-A	YCL021W-A	1	10	5	1	1	0
YCL018W	LEU2	207	387	382	50	55	67
YCL017C	NFS1	724	982	970	539	655	390
YCL016C	DCC1	92	134	102	33	50	49
YCL014W	BUD3	399	677	751	268	351	1151
YCL012C	YCL012C	62	107	71	37	47	29
YCL011C	GBP2	567	918	986	304	271	163
YCL010C	SGF29	140	212	226	57	45	58
YCL009C	ILV6	1826	2604	2639	657	855	502
YCL008C	STP22	126	135	156	56	80	39
YCL007C	YCL007C	0	0	0	0	1	0
YCL005W-A	VMA9	571	982	942	272	298	170
YCL005W	LDB16	38	50	57	13	22	19
YCL004W	PGS1	28	28	58	35	51	35
YCL002C	YCL002C	42	50	65	10	12	25
YCL001W	RER1	444	781	651	187	211	165
YCL001W-A	YCL001W-A	0	0	2	3	3	3
YCL001W-B	YCL001W-B	0	0	0	0	0	0
YCR001W	YCR001W	0	3	0	0	0	5
YCR002C	CDC10	662	846	863	691	679	436
YCR003W	MRPL32	156	270	223	90	99	71
YCR004C	YCP4	922	1252	1185	477	657	387
YCR005C	CIT2	491	1265	2051	897	1038	574
YCR006C	YCR006C	0	0	3	0	1	2
YCR007C	YCR007C	5	8	8	10	16	10
YCR008W	SAT4	280	394	424	86	123	83
YCR009C	RVS161	537	894	747	402	441	312
YCR010C	ADY2	2	6	0	1	5	5
YCR011C	ADP1	620	711	694	381	443	267
YCR012W	PGK1	75093	111188	89670	39524	43268	35135
YCR013C	YCR013C	0	2	4	1	3	22
YCR014C	POL4	6	20	18	7	16	17
YCR015C	CTO1	45	65	66	12	39	20
YCR016W	YCR016W	383	788	838	154	219	160
YCR017C	CWH43	538	652	656	276	326	215
YCR018C	SRD1	110	179	151	43	35	23
YCR018C-A	YCR018C-A	1	0	0	1	0	4
YCR019W	MAK32	72	76	113	34	56	26
YCR020C	PET18	8	14	6	1	7	3
YCR020C-A	MAK31	109	148	114	35	37	31
YCR020W-B	HTL1	112	171	162	39	48	38
YCR021C	HSP30	8	8	7	63	99	41
YCR022C	YCR022C	0	1	2	0	1	0
YCR023C	YCR023C	94	107	121	29	25	29
YCR024C	SLM5	68	100	46	66	80	40
YCR024C-B	YCR024C-B	15	0	11	3	5	2
YCR024C-A	PMP1	1201	1359	1091	483	394	265
YCR025C	YCR025C	0	0	0	0	0	1
YCR026C	NPP1	211	276	238	142	206	118
YCR027C	RHB1	90	105	115	41	55	46
YCR028C	FEN2	169	180	205	75	87	67
YCR028C-A	RIM1	924	1545	1254	385	423	229
YCR030C	SYP1	672	1031	966	532	669	469
YCR031C	RPS14A	10285	20259	15848	3797	4293	3234
YCR032W	BPH1	63	103	108	53	57	69
YCR033W	SNT1	258	445	385	106	160	122
YCR034W	YCR034W	1466	2568	2264	585	681	687
YCR035C	RRP43	457	718	597	349	425	710
YCR036W	RBK1	220	324	302	236	245	158
YCR037C	PHO87	177	406	510	372	439	380
YCR038C	BUD5	11	20	13	5	15	7
YCR038W-A	YCR038W-A	0	0	0	0	0	1
YCR039C	MATALPHA2	0	0	0	0	0	0
YCR040W	MATALPHA1	0	0	0	0	0	0
YCR041W	YCR041W	0	0	0	0	1	1
YCR042C	TAF2	262	317	395	210	214	159
YCR043C	YCR043C	324	566	462	126	103	97
YCR044C	PER1	169	173	169	64	60	37
YCR045C	RRT12	0	3	3	4	6	3
YCR045W-A	YCR045W-A	0	1	0	0	5	1
YCR046C	IMG1	230	400	306	199	205	129
YCR047C	BUD23	278	426	528	134	166	120
YCR047W-A	YCR047W-A	1	0	0	0	1	0
YCR049C	YCR049C	1	0	0	2	1	1
YCR048W	ARE1	239	366	347	76	93	80
YCR050C	YCR050C	0	0	0	0	0	1
YCR051W	YCR051W	407	766	895	153	176	137
YCR052W	RSC6	457	909	835	334	431	281
YCR053W	THR4	4499	7373	7260	2480	3159	1909
YCR054C	CTR86	163	187	213	75	77	42
YCR057C	PWP2	651	811	1025	400	490	327
YCR059C	YIH1	169	236	231	69	93	38
YCR060W	TAH1	102	183	128	55	68	63
YCR061W	YCR061W	548	537	426	237	335	227
YCR064C	YCR064C	1	2	1	0	0	0
YCR063W	BUD31	71	95	67	50	61	34
YCR065W	HCM1	294	577	559	199	226	159
YCR066W	RAD18	69	125	154	39	45	33
YCR067C	SED4	647	903	913	571	689	473
YCR068W	ATG15	58	102	79	27	36	40
YCR069W	CPR4	364	463	425	180	167	119
YCR071C	IMG2	200	263	168	106	129	96
YCR072C	RSA4	464	947	814	413	669	524
YCR073C	SSK22	44	37	63	58	78	46
YCR073W-A	SOL2	279	544	543	237	221	183
YCR075C	ERS1	48	43	55	25	14	22
YCR075W-A	EGO2	70	125	111	52	43	47
YCR076C	FUB1	66	111	109	55	87	51
YCR077C	PAT1	1386	2090	2108	632	705	528
YCR079W	PTC6	33	48	38	10	19	54
YCR081W	SRB8	118	131	169	86	97	57
YCR081C-A	YCR081C-A	0	0	0	0	0	2
YCR082W	AHC2	181	402	300	89	113	75
YCR083W	TRX3	107	237	203	80	69	86
YCR084C	TUP1	1176	1713	2147	672	1014	714
YCR085W	YCR085W	0	0	0	0	1	4
YCR086W	CSM1	125	236	138	70	83	49
YCR087W	YCR087W	0	2	3	5	2	7
YCR087C-A	YCR087C-A	292	552	713	117	134	77
YCR088W	ABP1	2616	4101	3507	2123	2557	2220
YCR089W	FIG2	13	22	25	15	14	51
YCR090C	YCR090C	235	296	338	63	70	52
YCR091W	KIN82	21	74	40	66	60	50
YCR092C	MSH3	156	179	217	46	71	77
YCR093W	CDC39	1271	1716	2030	677	916	610
YCR094W	CDC50	298	301	320	132	152	119
YCR095C	OCA4	74	118	130	65	53	50
YCR095W-A	YCR095W-A	0	0	0	0	0	0
YCR096C	HMRA2	0	0	0	0	0	0
YCR097W	HMRA1	123	209	151	66	76	38
YCR097W-A	YCR097W-A	0	0	0	0	0	2
YCR098C	GIT1	121	220	349	256	255	154
YCR099C	YCR099C	1	0	0	0	2	0
YCR100C	YCR100C	1	0	0	0	0	7
YCR101C	YCR101C	13	6	4	20	21	17
YCR102C	YCR102C	0	1	4	5	5	14
YCR102W-A	YCR102W-A	0	0	0	0	0	1
YCR104W	PAU3	0	0	1	0	1	2
YCR105W	ADH7	10	14	18	3	7	20
YCR106W	RDS1	24	44	57	12	23	30
YCR107W	AAD3	2	3	4	9	32	32
YCR108C	YCR108C	0	1	0	0	0	0
YDL248W	COS7	17	45	29	37	37	31
YDL247W-A	YDL247W-A	0	0	0	0	0	0
YDL247W	MPH2	6	1	0	0	0	7
YDL246C	SOR2	3	4	4	1	4	10
YDL245C	HXT15	0	1	1	2	1	1
YDL244W	THI13	6	2	2	6	1	1
YDL243C	AAD4	1	4	2	3	7	4
YDL242W	YDL242W	1	0	1	0	2	0
YDL241W	YDL241W	115	215	280	104	161	89
YDL240C-A	YDL240C-A	0	0	0	0	0	0
YDL240W	LRG1	134	143	128	78	73	68
YDL239C	ADY3	10	21	15	12	6	44
YDL238C	GUD1	33	26	30	34	34	21
YDL237W	AIM6	337	326	394	226	259	172
YDL236W	PHO13	664	1204	1083	896	968	649
YDL235C	YPD1	324	463	448	409	451	236
YDL234C	GYP7	122	134	148	437	617	288
YDL233W	MFG1	103	157	186	199	213	164
YDL232W	OST4	205	259	235	114	148	84
YDL231C	BRE4	18	24	18	23	20	28
YDL230W	PTP1	96	111	120	141	213	87
YDL229W	SSB1	13230	25213	26095	8476	10198	7729
YDL228C	YDL228C	0	0	0	0	0	1
YDL227C	HO	469	914	959	163	159	108
YDL226C	GCS1	973	1641	1413	944	1031	795
YDL225W	SHS1	674	928	974	1205	1435	887
YDL224C	WHI4	374	632	589	271	339	246
YDL223C	HBT1	59	71	55	212	406	343
YDL222C	FMP45	1	3	13	41	48	28
YDL221W	YDL221W	0	0	0	0	0	2
YDL220C	CDC13	84	91	126	70	77	42
YDL219W	DTD1	278	319	284	143	155	96
YDL218W	YDL218W	2	1	2	6	4	14
YDL217C	TIM22	184	255	205	152	160	137
YDL216C	RRI1	42	36	34	52	56	32
YDL215C	GDH2	207	271	295	1360	1573	940
YDL214C	PRR2	4	6	0	11	10	13
YDL213C	NOP6	440	938	957	316	426	301
YDL212W	SHR3	878	1344	1255	658	667	452
YDL211C	YDL211C	27	77	71	35	41	41
YDL210W	UGA4	7	15	8	11	4	22
YDL209C	CWC2	111	99	80	79	81	55
YDL208W	NHP2	1405	2953	2911	1062	1292	1016
YDL207W	GLE1	171	275	300	154	176	130
YDL206W	YDL206W	46	29	38	29	50	75
YDL205C	HEM3	293	399	380	238	269	193
YDL204W-A	YDL204W-A	10	10	6	11	9	6
YDL204W	RTN2	17	23	29	162	297	245
YDL203C	ACK1	256	339	362	131	148	96
YDL202W	MRPL11	300	335	340	307	384	220
YDL201W	TRM8	417	808	864	253	346	225
YDL200C	MGT1	51	83	89	61	64	32
YDL199C	YDL199C	11	21	36	41	54	25
YDL198C	GGC1	826	917	770	469	564	376
YDL197C	ASF2	49	66	48	28	40	39
YDL196W	YDL196W	3	2	5	1	5	6
YDL195W	SEC31	3091	5328	5521	3860	4780	4223
YDL194W	SNF3	20	29	26	24	57	33
YDL193W	NUS1	318	479	361	305	354	250
YDL192W	ARF1	3720	4843	5068	3469	3648	2131
YDL191W	RPL35A	1734	4525	3565	1289	1414	1109
YDL190C	UFD2	434	397	607	794	977	568
YDL189W	RBS1	285	337	445	242	251	211
YDL188C	PPH22	236	333	359	288	354	191
YDL187C	YDL187C	0	0	0	3	0	7
YDL186W	YDL186W	85	1	7	62	62	7
YDL185C-A	YDL185C-A	2	0	0	0	0	0
YDL185W	VMA1	10631	13934	15226	8786	10251	7340
YDL184C	RPL41A	1183	1913	1155	1208	973	441
YDL183C	YDL183C	25	46	47	14	38	22
YDL182W	LYS20	696	1207	1463	1019	1121	830
YDL181W	INH1	372	694	504	557	722	516
YDL180W	YDL180W	92	135	146	125	200	99
YDL179W	PCL9	233	356	352	232	334	249
YDL178W	DLD2	511	580	563	350	395	292
YDL177C	YDL177C	36	53	52	27	39	19
YDL176W	YDL176W	39	68	65	43	45	41
YDL175C	AIR2	162	273	262	169	188	142
YDL174C	DLD1	319	535	574	471	552	323
YDL173W	PAR32	411	880	807	370	419	382
YDL172C	YDL172C	2	4	4	4	7	11
YDL171C	GLT1	2260	3148	3472	1117	1389	1081
YDL170W	UGA3	59	150	107	64	67	46
YDL169C	UGX2	9	18	5	29	37	39
YDL168W	SFA1	1014	1550	1681	1474	1772	1255
YDL167C	NRP1	295	454	596	219	312	225
YDL166C	FAP7	254	406	360	324	272	199
YDL165W	CDC36	266	420	322	360	394	250
YDL164C	CDC9	271	390	442	361	451	263
YDL163W	YDL163W	0	0	0	2	0	0
YDL162C	YDL162C	1	0	0	2	0	1
YDL161W	ENT1	469	965	811	944	1079	867
YDL160C-A	MHF2	81	139	156	49	66	38
YDL160C	DHH1	1176	1822	1759	1381	1510	889
YDL159W-A	YDL159W-A	0	0	0	0	1	1
YDL159W	STE7	109	233	227	142	177	112
YDL159C-B	YDL159C-B	0	0	0	0	0	2
YDL158C	YDL158C	0	5	6	10	5	8
YDL157C	YDL157C	276	430	340	190	154	113
YDL156W	CMR1	90	163	169	102	166	85
YDL155W	CLB3	168	261	199	175	156	144
YDL154W	MSH5	5	6	6	1	7	13
YDL153C	SAS10	706	1069	1548	708	813	543
YDL152W	YDL152W	1	8	5	3	2	19
YDL151C	BUD30	0	1	0	1	1	1
YDL150W	RPC53	361	602	645	405	485	376
YDL149W	ATG9	46	86	54	69	96	88
YDL148C	NOP14	705	824	970	974	1241	683
YDL147W	RPN5	1231	2471	2036	1833	2251	1870
YDL146W	LDB17	36	51	48	53	50	28
YDL145C	COP1	1520	1631	1743	2069	2522	1293
YDL144C	YDL144C	140	219	192	141	130	74
YDL143W	CCT4	1570	2099	2352	1735	2020	1439
YDL142C	CRD1	94	91	88	67	107	39
YDL141W	BPL1	310	382	398	244	261	190
YDL140C	RPO21	1817	2372	3079	2182	2883	1914
YDL139C	SCM3	48	97	50	44	52	30
YDL138W	RGT2	46	74	43	52	31	103
YDL137W	ARF2	1314	1700	1506	1438	1622	1100
YDL136W	RPL35B	924	2115	1567	637	731	547
YDL135C	RDI1	607	1083	913	630	719	511
YDL134C	PPH21	372	611	550	386	474	336
YDL133C-A	RPL41B	1329	2403	1457	1443	1261	451
YDL133W	SRF1	72	152	132	91	89	73
YDL132W	CDC53	463	580	625	605	864	487
YDL131W	LYS21	945	1332	1258	1326	1682	1095
YDL130W-A	STF1	115	245	143	353	444	397
YDL130W	RPP1B	7082	12856	10499	5626	6030	4607
YDL129W	YDL129W	44	86	107	38	51	46
YDL128W	VCX1	730	1140	1108	791	889	714
YDL127W	PCL2	138	235	175	111	155	128
YDL126C	CDC48	5758	8033	8095	9701	11778	7038
YDL125C	HNT1	881	1691	1514	634	678	532
YDL124W	YDL124W	1234	1409	1193	2802	4016	2329
YDL123W	SNA4	60	94	135	64	77	70
YDL122W	UBP1	416	489	525	450	610	352
YDL121C	YDL121C	232	306	333	127	162	90
YDL120W	YFH1	246	451	357	347	394	223
YDL119C	HEM25	92	100	89	183	221	119
YDL118W	YDL118W	1	0	0	0	0	5
YDL117W	CYK3	272	323	375	355	400	280
YDL116W	NUP84	375	423	484	735	885	507
YDL115C	IWR1	116	178	161	241	216	151
YDL114W-A	YDL114W-A	0	0	0	0	0	0
YDL114W	YDL114W	0	0	0	3	2	7
YDL113C	ATG20	161	262	236	198	254	138
YDL112W	TRM3	533	765	1077	415	566	422
YDL111C	RRP42	325	450	573	319	402	300
YDL110C	TMA17	233	534	294	381	499	322
YDL109C	YDL109C	13	4	10	9	16	12
YDL108W	KIN28	160	228	205	119	157	239
YDL107W	MSS2	107	94	61	71	98	60
YDL106C	PHO2	190	326	311	340	373	206
YDL105W	NSE4	34	104	74	69	82	46
YDL104C	QRI7	60	57	55	73	96	25
YDL103C	QRI1	778	1337	1172	1085	1238	858
YDL102W	POL3	425	618	677	698	885	586
YDL101C	DUN1	200	353	337	283	324	196
YDL100C	GET3	2068	2386	2384	1743	1951	1248
YDL099W	BUG1	418	887	727	734	792	763
YDL098C	SNU23	48	123	91	27	45	16
YDL097C	RPN6	1412	2598	2321	2183	2522	1895
YDL096C	OPI6	0	0	0	0	0	0
YDL095W	PMT1	2119	2672	2694	1757	2150	1569
YDL094C	YDL094C	0	0	1	4	0	2
YDL093W	PMT5	188	245	259	167	165	318
YDL092W	SRP14	349	662	594	415	452	287
YDL091C	UBX3	73	106	107	106	125	78
YDL090C	RAM1	159	137	140	66	102	60
YDL089W	NUR1	82	141	117	77	82	70
YDL088C	ASM4	310	570	496	364	449	255
YDL087C	LUC7	53	106	121	62	51	59
YDL086W	YDL086W	764	905	961	664	808	579
YDL086C-A	YDL086C-A	0	0	1	3	0	0
YDL085C-A	YDL085C-A	121	169	126	54	72	33
YDL085W	NDE2	10	7	8	19	22	28
YDL084W	SUB2	4567	7912	7238	3084	3727	2798
YDL083C	RPS16B	8249	14911	12792	6072	6228	3971
YDL082W	RPL13A	8003	20932	16404	7342	7979	6999
YDL081C	RPP1A	8755	13880	11937	5513	5360	3202
YDL080C	THI3	62	49	50	59	79	70
YDL079C	MRK1	6	4	6	7	10	11
YDL078C	MDH3	876	1165	1055	823	979	570
YDL077C	VAM6	122	161	118	144	141	79
YDL076C	RXT3	116	242	188	115	142	85
YDL075W	RPL31A	10139	23624	19575	8370	9250	7180
YDL074C	BRE1	532	902	912	349	470	351
YDL073W	AHK1	343	296	460	284	1042	645
YDL072C	YET3	587	687	639	1259	1484	813
YDL071C	YDL071C	3	0	0	1	0	0
YDL070W	BDF2	389	731	617	455	518	461
YDL069C	CBS1	80	83	91	42	50	40
YDL068W	YDL068W	1	6	0	0	4	1
YDL067C	COX9	530	1142	855	588	831	522
YDL066W	IDP1	2303	3131	2973	1509	1831	1198
YDL065C	PEX19	303	553	465	407	381	336
YDL064W	UBC9	378	616	537	332	369	232
YDL063C	SYO1	412	541	635	291	370	257
YDL062W	YDL062W	1	3	0	0	1	1
YDL061C	RPS29B	4871	11677	10098	4399	5150	3266
YDL060W	TSR1	629	767	1024	758	922	469
YDL059C	RAD59	43	65	59	39	41	43
YDL058W	USO1	360	496	649	497	679	465
YDL057W	YDL057W	42	90	62	93	55	50
YDL056W	MBP1	202	340	280	219	218	174
YDL055C	PSA1	10992	17397	16262	11423	13179	7019
YDL054C	MCH1	134	146	166	144	148	97
YDL053C	PBP4	358	623	440	310	350	236
YDL052C	SLC1	389	534	425	299	357	221
YDL051W	LHP1	1199	2421	2393	857	1005	808
YDL050C	YDL050C	0	1	0	1	0	2
YDL049C	KNH1	19	20	6	18	41	23
YDL048C	STP4	44	168	122	134	198	179
YDL047W	SIT4	353	580	512	321	331	262
YDL046W	NPC2	733	1076	1003	1018	1358	935
YDL045W-A	MRP10	179	279	208	241	203	141
YDL045C	FAD1	111	120	105	147	133	70
YDL044C	MTF2	114	106	105	100	118	38
YDL043C	PRP11	141	199	231	178	175	132
YDL042C	SIR2	183	377	377	196	183	176
YDL041W	YDL041W	0	0	0	0	0	0
YDL040C	NAT1	864	1010	1105	909	1207	634
YDL039C	PRM7	9	11	2	16	21	18
YDL037C	BSC1	0	0	1	1	1	6
YDL036C	PUS9	131	150	125	82	83	65
YDL035C	GPR1	194	222	229	158	220	174
YDL034W	YDL034W	0	4	0	0	0	1
YDL033C	SLM3	52	46	73	48	34	43
YDL032W	YDL032W	0	1	2	0	0	1
YDL031W	DBP10	907	1481	2056	930	1132	811
YDL030W	PRP9	99	177	161	94	115	94
YDL029W	ARP2	886	1162	1142	1428	1811	1117
YDL028C	MPS1	161	229	208	142	173	213
YDL027C	MRX9	77	71	75	91	122	61
YDL026W	YDL026W	0	4	0	0	0	1
YDL025C	RTK1	118	204	158	258	255	177
YDL025W-A	YDL025W-A	0	0	0	0	1	3
YDL024C	DIA3	16	5	14	27	34	41
YDL022C-A	YDL022C-A	0	0	0	0	0	0
YDL023C	YDL023C	0	0	0	0	1	1
YDL022W	GPD1	1371	2192	1324	2102	2691	1688
YDL021W	GPM2	28	14	12	81	87	70
YDL020C	RPN4	465	664	695	843	1000	474
YDL019C	OSH2	562	805	754	678	758	430
YDL018C	ERP3	138	158	181	216	175	92
YDL017W	CDC7	59	102	149	138	197	143
YDL016C	YDL016C	0	1	0	0	0	0
YDL015C	TSC13	1302	1912	1730	1126	1339	803
YDL014W	NOP1	4491	9435	8849	3548	4337	3294
YDL013W	SLX5	177	283	323	236	314	487
YDL012C	YDL012C	320	500	483	308	333	231
YDL011C	YDL011C	0	0	1	0	0	2
YDL010W	GRX6	170	400	353	253	337	184
YDL009C	YDL009C	1	0	0	0	1	2
YDL008W	APC11	106	113	149	80	100	52
YDL007C-A	YDL007C-A	0	0	0	0	4	4
YDL007W	RPT2	1288	1753	1696	2877	3122	2246
YDL006W	PTC1	172	234	222	159	175	120
YDL005C	MED2	132	233	226	194	322	208
YDL004W	ATP16	1012	1903	1452	1118	1273	965
YDL003W	MCD1	377	783	655	667	826	598
YDL002C	NHP10	243	359	307	176	203	124
YDL001W	RMD1	177	232	206	148	146	111
YDR001C	NTH1	334	381	378	1956	2710	1352
YDR002W	YRB1	3378	7861	6123	3438	3985	3174
YDR003W	RCR2	97	114	104	125	192	124
YDR003W-A	YDR003W-A	2	1	0	0	1	2
YDR004W	RAD57	25	70	56	46	36	30
YDR005C	MAF1	158	265	355	150	259	161
YDR006C	SOK1	284	676	492	339	349	313
YDR007W	TRP1	16	17	18	16	7	16
YDR008C	YDR008C	3	5	9	1	1	0
YDR009W	GAL3	17	9	5	46	70	41
YDR010C	YDR010C	0	0	1	0	0	0
YDR011W	SNQ2	1301	1814	1682	1495	1775	1134
YDR012W	RPL4B	3262	6315	5652	2440	2793	2050
YDR013W	PSF1	108	126	108	148	144	68
YDR014W	RAD61	58	100	67	67	68	42
YDR014W-A	HED1	2	4	4	7	9	12
YDR015C	YDR015C	0	0	0	0	0	2
YDR016C	DAD1	69	125	62	64	68	32
YDR017C	KCS1	321	521	586	362	461	328
YDR018C	YDR018C	2	1	10	9	7	15
YDR019C	GCV1	386	279	186	1193	1233	693
YDR020C	DAS2	117	173	143	59	55	47
YDR021W	FAL1	129	211	218	76	102	85
YDR022C	YDR022C	33	60	40	28	29	16
YDR023W	SES1	5094	9145	8671	5685	6643	4440
YDR024W	FYV1	1	3	1	2	2	2
YDR025W	RPS11A	7287	19269	15290	6604	7663	6327
YDR026C	NSI1	117	274	208	120	142	91
YDR027C	VPS54	195	192	213	169	167	111
YDR028C	REG1	837	1365	1338	1071	1298	895
YDR029W	YDR029W	0	0	0	0	0	0
YDR030C	RAD28	29	17	27	47	40	38
YDR031W	MIX14	77	95	79	144	126	120
YDR032C	PST2	1377	1914	1587	2075	2508	1577
YDR033W	MRH1	7815	10475	10314	6055	8086	5224
YDR034C	LYS14	226	256	221	170	247	163
YDR034C-A	YDR034C-A	0	0	0	1	0	0
YDR034W-B	YDR034W-B	7	10	0	112	148	76
YDR035W	ARO3	1272	1700	1928	1689	2023	1364
YDR036C	EHD3	308	397	348	426	507	414
YDR037W	KRS1	6764	9877	10376	6049	7109	4503
YDR038C	ENA5	19	26	45	19	30	15
YDR039C	ENA2	0	0	0	0	0	0
YDR040C	ENA1	27	74	51	112	116	60
YDR041W	RSM10	217	374	265	379	400	250
YDR042C	YDR042C	5	15	19	5	16	7
YDR043C	NRG1	111	190	264	210	387	170
YDR044W	HEM13	335	586	552	299	274	204
YDR045C	RPC11	335	489	420	175	193	101
YDR046C	BAP3	789	1431	1502	1138	1557	1017
YDR047W	HEM12	392	536	567	512	481	371
YDR048C	YDR048C	0	0	0	0	2	1
YDR049W	VMS1	198	399	354	216	285	191
YDR050C	TPI1	26728	36773	33646	26882	29444	17739
YDR051C	DET1	202	279	281	276	266	165
YDR052C	DBF4	205	401	282	204	272	187
YDR053W	YDR053W	0	0	0	1	1	0
YDR054C	CDC34	607	828	838	989	1129	576
YDR055W	PST1	1663	2659	2467	9447	12553	9336
YDR056C	EMC10	287	379	394	369	377	187
YDR057W	YOS9	165	195	187	235	266	160
YDR058C	TGL2	28	42	11	73	70	36
YDR059C	UBC5	57	109	101	185	214	130
YDR060W	MAK21	1352	2367	2917	1656	2002	1481
YDR061W	YDR061W	167	201	154	275	323	237
YDR062W	LCB2	923	1337	1385	762	984	644
YDR063W	AIM7	221	373	233	243	282	165
YDR064W	RPS13	15518	33937	28293	11879	13009	9574
YDR065W	RRG1	40	38	43	18	21	25
YDR066C	RTR2	40	28	56	24	31	12
YDR067C	OCA6	100	90	72	93	110	52
YDR068W	DOS2	172	314	287	191	285	197
YDR069C	DOA4	126	168	140	164	171	122
YDR070C	FMP16	6	7	1	32	22	23
YDR071C	PAA1	1160	1716	1706	1197	1380	846
YDR072C	IPT1	270	465	435	403	456	369
YDR073W	SNF11	57	107	118	54	62	61
YDR074W	TPS2	678	806	699	1886	2525	1560
YDR075W	PPH3	129	171	163	92	83	88
YDR076W	RAD55	29	40	53	24	35	23
YDR077W	SED1	12660	24201	20668	80446	105319	96044
YDR078C	SHU2	9	40	43	8	10	10
YDR079W	PET100	112	111	116	124	120	78
YDR079C-A	TFB5	61	84	69	32	42	21
YDR080W	VPS41	167	244	241	169	181	146
YDR081C	PDC2	209	294	353	294	308	238
YDR082W	STN1	5	13	20	15	15	34
YDR083W	RRP8	473	750	991	437	521	392
YDR084C	TVP23	213	324	278	200	191	123
YDR085C	AFR1	54	43	38	197	247	98
YDR086C	SSS1	1075	2317	1852	869	958	709
YDR087C	RRP1	480	743	932	429	453	341
YDR088C	SLU7	104	224	228	132	179	80
YDR089W	VTC5	354	405	377	508	528	307
YDR090C	YDR090C	130	154	198	107	100	58
YDR091C	RLI1	1683	2248	2674	1785	1941	1276
YDR092W	UBC13	425	839	556	446	481	395
YDR093W	DNF2	451	840	805	400	493	942
YDR094W	YDR094W	0	0	1	0	0	2
YDR095C	YDR095C	0	0	0	0	0	2
YDR096W	GIS1	210	562	440	345	467	292
YDR097C	MSH6	276	547	721	625	745	535
YDR098C	GRX3	997	1768	1526	1054	1056	777
YDR099W	BMH2	3563	5634	4839	3127	4079	2832
YDR100W	TVP15	213	304	214	241	248	189
YDR101C	ARX1	815	1306	1845	832	1170	744
YDR102C	YDR102C	0	0	1	0	1	0
YDR103W	STE5	284	447	447	312	422	261
YDR104C	SPO71	42	51	52	41	52	62
YDR105C	TMS1	156	187	181	182	174	122
YDR106W	ARP10	5	11	6	15	12	12
YDR107C	TMN2	44	49	49	43	41	26
YDR108W	TRS85	67	113	111	76	96	44
YDR109C	YDR109C	68	88	116	117	119	76
YDR110W	FOB1	184	235	223	115	230	97
YDR111C	ALT2	86	216	217	87	115	145
YDR112W	IRC2	0	0	0	1	0	3
YDR113C	PDS1	197	440	297	252	285	193
YDR114C	YDR114C	0	0	0	0	0	2
YDR115W	MRX14	205	387	338	290	292	242
YDR116C	MRPL1	229	304	221	250	302	187
YDR117C	TMA64	311	489	520	496	560	366
YDR118W	APC4	77	85	127	133	108	69
YDR118W-A	YDR118W-A	1	0	0	0	0	1
YDR119W	VBA4	927	1517	1420	1032	1125	849
YDR119W-A	COX26	49	86	74	29	49	25
YDR120C	TRM1	611	731	968	468	460	318
YDR121W	DPB4	177	363	259	170	185	142
YDR122W	KIN1	279	570	473	647	965	614
YDR123C	INO2	85	85	69	45	61	76
YDR124W	YDR124W	0	7	7	3	0	11
YDR125C	ECM18	9	30	22	12	15	22
YDR126W	SWF1	26	24	37	28	33	22
YDR127W	ARO1	2706	3029	3512	3016	3789	2676
YDR128W	MTC5	86	116	148	104	176	159
YDR129C	SAC6	2472	3691	3579	5174	5839	3711
YDR130C	FIN1	124	169	156	97	124	87
YDR131C	YDR131C	59	66	70	38	65	41
YDR132C	YDR132C	97	105	133	118	163	70
YDR133C	YDR133C	512	821	908	850	987	805
YDR135C	YCF1	896	1102	1206	957	1355	833
YDR136C	VPS61	0	4	0	0	4	1
YDR137W	RGP1	135	225	231	240	279	149
YDR138W	HPR1	190	232	258	240	298	166
YDR139C	RUB1	120	312	220	75	85	57
YDR140W	MTQ2	121	173	139	87	90	54
YDR141C	DOP1	352	411	463	552	743	372
YDR142C	PEX7	51	85	48	59	80	37
YDR143C	SAN1	305	407	460	311	341	204
YDR144C	MKC7	696	835	926	408	525	334
YDR145W	TAF12	641	1255	1220	627	708	523
YDR146C	SWI5	554	838	908	608	748	475
YDR147W	EKI1	109	130	146	114	126	80
YDR148C	KGD2	1179	2308	1770	1837	2542	1727
YDR149C	YDR149C	0	7	0	0	0	20
YDR150W	NUM1	584	907	914	663	970	723
YDR151C	CTH1	292	392	353	432	389	168
YDR152W	GIR2	428	640	654	504	558	410
YDR153C	ENT5	518	802	793	630	817	510
YDR154C	YDR154C	20	6	2	2	12	9
YDR155C	CPR1	5337	8358	6378	2706	3021	2277
YDR156W	RPA14	411	749	671	380	439	322
YDR157W	YDR157W	11	8	2	1	2	2
YDR158W	HOM2	5080	6215	6032	2343	2675	1766
YDR159W	SAC3	171	247	278	137	128	99
YDR160W	SSY1	43	59	56	27	57	36
YDR161W	ACL4	564	925	993	414	523	353
YDR162C	NBP2	199	306	255	267	285	237
YDR163W	CWC15	99	209	161	140	151	125
YDR164C	SEC1	207	207	258	238	275	130
YDR165W	TRM82	658	781	1006	550	686	735
YDR166C	SEC5	240	294	360	404	516	306
YDR167W	TAF10	312	448	465	306	399	219
YDR168W	CDC37	1303	2355	2041	1924	2038	1681
YDR169C	STB3	218	430	358	327	373	222
YDR169C-A	YDR169C-A	1	2	1	0	0	0
YDR170C	SEC7	1882	2714	3134	1325	1804	1238
YDR171W	HSP42	188	352	163	636	597	433
YDR172W	SUP35	3668	5987	5940	6138	7377	5278
YDR173C	ARG82	69	88	70	37	55	42
YDR174W	HMO1	903	1724	1631	713	891	522
YDR175C	RSM24	279	413	346	391	507	283
YDR176W	NGG1	211	300	282	133	205	112
YDR177W	UBC1	684	1463	1273	815	1126	720
YDR178W	SDH4	252	674	493	592	722	572
YDR179C	CSN9	37	56	53	29	33	34
YDR179W-A	NVJ3	36	68	44	49	40	42
YDR180W	SCC2	215	242	300	167	235	202
YDR181C	SAS4	71	88	92	55	104	61
YDR182W	CDC1	288	437	420	393	518	220
YDR182W-A	YDR182W-A	0	0	1	0	0	1
YDR183W	PLP1	133	155	138	91	110	79
YDR183C-A	YDR183C-A	0	0	3	1	2	3
YDR184C	ATC1	181	402	309	135	177	167
YDR185C	UPS3	14	40	64	29	38	18
YDR186C	SND1	299	486	421	316	418	267
YDR187C	YDR187C	2	0	4	7	3	2
YDR188W	CCT6	1725	2803	2919	2030	2469	1826
YDR189W	SLY1	608	788	816	1013	1204	797
YDR190C	RVB1	1219	1550	1806	1516	1615	1211
YDR191W	HST4	50	79	66	50	62	57
YDR192C	NUP42	196	323	289	247	242	173
YDR193W	YDR193W	0	1	0	0	0	1
YDR194C	MSS116	743	950	932	623	773	393
YDR194W-A	YDR194W-A	0	0	0	0	0	1
YDR195W	REF2	277	733	709	344	399	328
YDR196C	CAB5	97	179	180	161	193	106
YDR197W	CBS2	60	109	93	88	99	55
YDR198C	RKM2	91	78	143	61	64	44
YDR199W	YDR199W	1	0	0	2	0	0
YDR200C	VPS64	128	167	130	151	150	111
YDR201W	SPC19	81	170	128	81	78	50
YDR202C	RAV2	106	154	258	144	419	99
YDR203W	YDR203W	4	0	0	0	2	1
YDR204W	COQ4	99	154	130	158	166	112
YDR205W	MSC2	120	167	221	131	139	122
YDR206W	EBS1	200	305	325	110	119	125
YDR207C	UME6	182	374	392	151	164	165
YDR208W	MSS4	415	941	826	474	622	491
YDR209C	YDR209C	0	0	0	0	1	3
YDR210W	YDR210W	693	1100	1005	575	481	382
YDR211W	GCD6	755	863	1044	937	1153	655
YDR212W	TCP1	1790	2802	2825	1898	2401	1618
YDR213W	UPC2	122	271	285	121	162	161
YDR214W	AHA1	2138	3091	1958	2430	2791	2116
YDR215C	YDR215C	0	0	2	2	0	2
YDR216W	ADR1	306	158	134	1640	1757	762
YDR217C	RAD9	293	490	512	321	407	274
YDR218C	SPR28	6	6	13	12	23	19
YDR219C	MFB1	154	266	218	190	237	130
YDR220C	YDR220C	0	0	0	0	2	2
YDR221W	GTB1	255	307	299	206	252	182
YDR222W	YDR222W	261	297	183	205	227	183
YDR223W	CRF1	1	1	1	2	3	8
YDR224C	HTB1	3063	7761	5289	2952	3375	2374
YDR225W	HTA1	2305	5875	3610	2729	2949	1934
YDR226W	ADK1	4876	9329	7654	2398	2749	2280
YDR227W	SIR4	225	406	478	125	181	145
YDR228C	PCF11	171	284	336	212	256	164
YDR229W	IVY1	178	270	237	204	288	192
YDR230W	YDR230W	0	0	0	0	0	3
YDR231C	COX20	66	177	128	168	216	90
YDR232W	HEM1	1084	1738	1962	843	1111	776
YDR233C	RTN1	2761	4180	4370	2811	3432	2147
YDR234W	LYS4	731	1003	1177	862	1015	705
YDR235W	PRP42	376	434	425	422	1526	349
YDR236C	FMN1	81	121	124	100	66	52
YDR237W	MRPL7	258	303	275	300	345	237
YDR238C	SEC26	2331	2587	3114	4322	5326	2850
YDR239C	YDR239C	215	355	309	157	170	140
YDR240C	SNU56	79	144	113	91	101	47
YDR241W	BUD26	1	0	1	2	0	0
YDR242W	AMD2	17	19	17	57	59	50
YDR243C	PRP28	96	138	180	108	137	79
YDR244W	PEX5	258	441	432	440	480	316
YDR245W	MNN10	538	707	696	383	430	229
YDR246W	TRS23	117	128	145	110	180	106
YDR246W-A	YDR246W-A	0	2	7	3	0	4
YDR247W	VHS1	44	41	76	59	95	29
YDR248C	YDR248C	94	122	94	50	59	46
YDR249C	YDR249C	24	41	22	25	25	20
YDR250C	YDR250C	0	1	0	1	2	5
YDR251W	PAM1	365	546	515	467	580	405
YDR252W	BTT1	39	145	94	46	66	54
YDR253C	MET32	39	28	24	8	13	9
YDR254W	CHL4	60	54	52	57	64	46
YDR255C	RMD5	47	48	58	101	102	53
YDR256C	CTA1	5	9	0	9	6	11
YDR257C	RKM4	217	288	319	250	300	134
YDR258C	HSP78	821	907	535	1268	1308	802
YDR259C	YAP6	20	75	28	82	73	65
YDR260C	SWM1	107	115	115	153	159	88
YDR261C	EXG2	354	532	440	328	372	269
YDR262W	YDR262W	137	303	295	361	431	341
YDR263C	DIN7	10	12	9	12	16	15
YDR264C	AKR1	758	1029	1066	711	888	545
YDR265W	PEX10	36	51	34	36	52	26
YDR266C	HEL2	515	936	819	620	650	452
YDR267C	CIA1	196	280	271	193	250	212
YDR268W	MSW1	92	133	107	135	150	102
YDR269C	YDR269C	0	0	1	0	0	0
YDR270W	CCC2	177	304	275	266	309	165
YDR271C	YDR271C	1	0	0	2	4	2
YDR272W	GLO2	420	670	699	685	885	594
YDR273W	DON1	9	8	6	1	7	4
YDR274C	YDR274C	0	0	0	0	0	0
YDR275W	BSC2	34	26	42	41	36	56
YDR276C	PMP3	2208	4272	3241	2311	2549	1952
YDR277C	MTH1	60	107	142	261	341	173
YDR278C	YDR278C	815	438	316	434	600	435
YDR279W	RNH202	120	285	223	119	140	116
YDR280W	RRP45	279	553	526	362	407	263
YDR281C	PHM6	48	153	228	7	7	5
YDR282C	MRX10	56	76	49	38	71	68
YDR283C	GCN2	478	190	345	1365	2015	204
YDR284C	DPP1	270	298	357	293	341	192
YDR285W	ZIP1	27	29	34	13	13	25
YDR286C	YDR286C	50	58	38	41	40	25
YDR287W	INM2	122	101	115	168	180	107
YDR288W	NSE3	93	227	204	108	121	1301
YDR289C	RTT103	175	265	219	249	287	185
YDR290W	YDR290W	0	0	0	1	0	2
YDR291W	HRQ1	93	131	111	120	130	74
YDR292C	SRP101	549	755	794	505	688	355
YDR293C	SSD1	509	812	778	1125	1320	877
YDR294C	DPL1	453	539	549	647	805	489
YDR295C	HDA2	167	165	220	204	255	139
YDR296W	MHR1	232	344	326	443	530	283
YDR297W	SUR2	504	743	850	643	794	541
YDR298C	ATP5	1031	1737	1390	1118	1518	912
YDR299W	BFR2	591	1318	1361	828	1028	869
YDR300C	PRO1	447	588	662	460	583	312
YDR301W	CFT1	234	259	341	223	237	146
YDR302W	GPI11	170	254	232	155	177	148
YDR303C	RSC3	382	546	661	396	483	284
YDR304C	CPR5	1122	1385	1324	715	809	483
YDR305C	HNT2	100	144	101	100	106	76
YDR306C	YDR306C	76	108	98	90	104	70
YDR307W	PMT7	223	260	256	261	293	225
YDR308C	SRB7	166	213	211	203	206	100
YDR309C	GIC2	483	988	898	700	823	583
YDR310C	SUM1	454	804	796	366	429	346
YDR311W	TFB1	268	461	472	264	281	259
YDR312W	SSF2	209	317	277	210	249	175
YDR313C	PIB1	41	86	82	67	64	30
YDR314C	RAD34	21	33	30	35	29	24
YDR315C	IPK1	22	13	19	23	36	19
YDR316W	OMS1	117	143	107	221	243	148
YDR317W	HIM1	22	21	24	16	23	21
YDR318W	MCM21	74	356	443	61	220	4514
YDR319C	YDR319C	102	107	119	90	109	54
YDR320C	SWA2	365	616	668	446	571	431
YDR320C-A	DAD4	79	203	113	94	109	102
YDR320W-B	YDR320W-B	1	0	0	0	0	2
YDR321W	ASP1	1293	2076	2238	738	740	546
YDR322W	MRPL35	263	386	369	607	654	431
YDR322C-A	TIM11	322	677	646	485	492	347
YDR323C	PEP7	44	75	48	29	29	31
YDR324C	UTP4	916	1106	1479	826	953	535
YDR325W	YCG1	156	198	215	196	228	157
YDR326C	YSP2	301	570	616	459	548	362
YDR327W	YDR327W	1	0	0	0	0	1
YDR328C	SKP1	831	1716	1346	871	1086	674
YDR329C	PEX3	139	216	187	129	153	95
YDR330W	UBX5	232	422	321	221	296	225
YDR331W	GPI8	383	399	454	296	343	209
YDR332W	IRC3	38	42	54	22	34	45
YDR333C	RQC1	263	462	489	357	367	226
YDR334W	SWR1	116	184	180	136	197	154
YDR335W	MSN5	521	577	625	565	652	484
YDR336W	MRX8	34	54	44	6	21	15
YDR337W	MRPS28	284	439	422	425	480	323
YDR338C	YDR338C	87	94	94	79	107	65
YDR339C	FCF1	287	711	661	415	432	315
YDR340W	YDR340W	4	2	1	0	1	6
YDR341C	YDR341C	2840	4077	5014	3011	3570	2075
YDR342C	HXT7	30	31	20	72	96	43
YDR343C	HXT6	5	5	10	4	16	4
YDR344C	YDR344C	0	0	0	0	0	0
YDR345C	HXT3	2418	4071	3949	3957	4780	3264
YDR346C	SVF1	1197	1468	1624	753	934	549
YDR347W	MRP1	235	277	282	309	369	258
YDR348C	PAL1	480	985	872	548	610	473
YDR349C	YPS7	234	323	381	266	321	219
YDR350C	ATP22	67	71	60	39	60	49
YDR351W	SBE2	377	475	432	335	443	318
YDR352W	YPQ2	244	273	295	172	170	200
YDR353W	TRR1	2790	4673	4381	2813	3646	2727
YDR354W	TRP4	468	645	650	505	578	402
YDR354C-A	YDR354C-A	0	1	0	0	0	2
YDR355C	YDR355C	0	0	0	0	0	3
YDR356W	SPC110	271	724	718	398	606	599
YDR357C	CNL1	37	86	82	95	111	67
YDR358W	GGA1	238	293	302	550	571	366
YDR359C	EAF1	157	205	212	241	233	203
YDR360W	OPI7	0	0	0	0	0	3
YDR361C	BCP1	500	885	1022	205	249	197
YDR362C	TFC6	89	162	175	96	126	104
YDR363W	ESC2	98	161	152	73	77	105
YDR363W-A	SEM1	460	765	557	506	499	448
YDR364C	CDC40	88	175	175	96	131	113
YDR365C	ESF1	859	1686	2185	1244	1421	1017
YDR366C	YDR366C	0	0	0	0	0	1
YDR367W	KEI1	231	378	342	132	152	70
YDR368W	YPR1	1044	1429	1309	1168	1417	902
YDR369C	XRS2	103	172	158	64	69	68
YDR370C	DXO1	60	101	110	44	65	35
YDR371W	CTS2	96	118	131	150	193	77
YDR371C-A	YDR371C-A	0	0	0	0	0	1
YDR372C	VPS74	469	683	731	518	546	362
YDR373W	FRQ1	232	421	355	253	279	178
YDR374C	PHO92	2	10	3	0	2	10
YDR374W-A	WIP1	49	59	65	34	49	34
YDR375C	BCS1	155	191	146	124	151	114
YDR376W	ARH1	192	206	166	217	252	157
YDR377W	ATP17	754	1649	994	969	1119	700
YDR378C	LSM6	171	333	296	193	187	124
YDR379W	RGA2	154	358	303	195	261	182
YDR379C-A	SDH6	17	30	11	76	62	42
YDR380W	ARO10	551	837	711	1339	2009	1247
YDR381W	YRA1	2396	4601	3408	1621	1759	1519
YDR381C-A	YDR381C-A	32	56	46	48	58	44
YDR382W	RPP2B	9480	19387	16563	6567	7434	5312
YDR383C	NKP1	28	49	30	42	49	32
YDR384C	ATO3	426	797	789	292	289	216
YDR385W	EFT2	2338	2767	3105	1576	1913	1002
YDR386W	MUS81	37	86	58	43	56	45
YDR387C	CIN10	45	50	40	25	30	22
YDR388W	RVS167	1144	1589	1469	1797	2203	1592
YDR389W	SAC7	238	271	296	193	244	138
YDR390C	UBA2	230	260	234	368	423	215
YDR391C	YDR391C	75	151	111	266	295	177
YDR392W	SPT3	92	132	121	152	141	95
YDR393W	SHE9	72	94	72	41	66	46
YDR394W	RPT3	1028	1639	1534	2014	2400	1650
YDR395W	SXM1	1215	1385	1921	1401	1862	1224
YDR396W	YDR396W	0	0	2	5	6	12
YDR397C	NCB2	272	457	388	262	263	182
YDR398W	UTP5	716	1213	1470	766	1037	866
YDR399W	HPT1	944	1618	1912	845	1211	954
YDR400W	URH1	419	467	402	369	380	622
YDR401W	YDR401W	0	1	0	2	9	0
YDR402C	DIT2	2	3	1	3	3	14
YDR403W	DIT1	9	15	8	9	19	5
YDR404C	RPB7	306	489	470	296	309	176
YDR405W	MRP20	192	445	347	314	371	276
YDR406W	PDR15	44	38	40	199	152	128
YDR406W-A	YDR406W-A	0	0	0	1	1	0
YDR407C	TRS120	203	222	252	209	226	158
YDR408C	ADE8	310	435	405	307	325	190
YDR409W	SIZ1	124	171	175	119	145	106
YDR410C	STE14	120	175	204	102	150	52
YDR411C	DFM1	252	335	313	417	463	259
YDR412W	RRP17	402	675	784	327	351	234
YDR413C	YDR413C	1	0	3	1	3	5
YDR414C	ERD1	68	112	124	50	58	36
YDR415C	YDR415C	205	234	213	166	213	117
YDR416W	SYF1	147	161	172	141	199	117
YDR417C	YDR417C	0	3	1	0	1	2
YDR418W	RPL12B	10283	25012	20492	8466	9802	8606
YDR419W	RAD30	84	108	91	98	68	30
YDR420W	HKR1	165	271	310	193	234	240
YDR421W	ARO80	99	98	72	82	99	62
YDR422C	SIP1	234	355	393	245	266	181
YDR423C	CAD1	114	207	192	185	218	128
YDR424C	DYN2	157	370	299	188	205	143
YDR425W	SNX41	102	182	128	184	227	132
YDR426C	YDR426C	0	5	0	1	2	4
YDR427W	RPN9	1067	1452	1506	1479	1553	1131
YDR428C	BNA7	203	253	273	93	106	57
YDR429C	TIF35	2204	4120	4135	1997	2140	1466
YDR430C	CYM1	354	444	390	691	835	511
YDR431W	YDR431W	1	0	0	0	1	4
YDR432W	NPL3	3174	7412	6612	3757	4688	4686
YDR433W	YDR433W	0	1	0	2	0	0
YDR434W	GPI17	367	577	501	385	459	316
YDR435C	PPM1	81	135	124	110	161	74
YDR436W	PPZ2	91	167	146	117	174	92
YDR437W	GPI19	26	39	37	25	35	24
YDR438W	THI74	1	1	0	0	1	10
YDR439W	LRS4	67	95	89	47	55	40
YDR440W	DOT1	156	205	183	99	89	90
YDR441C	APT2	200	334	364	274	343	166
YDR442W	YDR442W	2	2	0	0	1	6
YDR443C	SSN2	119	194	161	133	153	171
YDR444W	YDR444W	73	99	98	72	70	55
YDR445C	YDR445C	42	100	82	22	79	20
YDR446W	ECM11	0	10	5	1	8	7
YDR447C	RPS17B	4869	10394	8570	4433	4692	3261
YDR448W	ADA2	114	224	188	107	166	190
YDR449C	UTP6	355	486	554	279	396	250
YDR450W	RPS18A	8743	17648	14462	6645	7440	5730
YDR451C	YHP1	353	554	526	441	528	356
YDR452W	PPN1	332	362	343	273	350	213
YDR453C	TSA2	16	9	15	20	40	28
YDR454C	GUK1	1540	2678	2072	613	699	403
YDR455C	YDR455C	0	0	0	0	0	1
YDR456W	NHX1	216	314	352	211	254	166
YDR457W	TOM1	456	700	737	704	920	619
YDR458C	HEH2	265	356	343	234	269	169
YDR459C	PFA5	30	23	19	23	9	23
YDR460W	TFB3	229	521	376	254	271	221
YDR461W	MFA1	264	668	457	131	118	122
YDR461C-A	YDR461C-A	61	106	55	93	75	53
YDR462W	MRPL28	253	434	374	390	416	276
YDR463W	STP1	447	967	858	748	862	724
YDR464W	SPP41	249	427	435	221	285	229
YDR464C-A	YDR464C-A	0	0	0	0	0	1
YDR465C	RMT2	357	574	874	355	326	231
YDR466W	PKH3	130	202	194	146	194	105
YDR467C	YDR467C	0	0	0	1	2	6
YDR468C	TLG1	197	408	308	269	317	238
YDR469W	SDC1	123	279	210	89	76	87
YDR470C	UGO1	143	230	159	162	185	104
YDR471W	RPL27B	4421	12184	9937	4001	4557	3886
YDR472W	TRS31	153	266	246	201	230	216
YDR473C	PRP3	82	172	177	136	173	90
YDR475C	JIP4	101	144	103	165	212	159
YDR476C	YDR476C	218	347	319	248	289	143
YDR477W	SNF1	523	676	657	768	891	462
YDR478W	SNM1	73	99	86	44	42	62
YDR479C	PEX29	79	102	85	118	158	71
YDR480W	DIG2	85	296	182	127	154	151
YDR481C	PHO8	730	1062	1453	673	761	473
YDR482C	CWC21	46	134	60	56	91	57
YDR483W	KRE2	1351	1717	2020	1205	1410	840
YDR484W	VPS52	128	139	176	123	146	294
YDR485C	VPS72	146	344	294	217	278	139
YDR486C	VPS60	194	372	314	353	429	273
YDR487C	RIB3	904	1194	1165	834	1007	628
YDR488C	PAC11	33	119	70	60	89	75
YDR489W	SLD5	102	189	152	97	123	102
YDR490C	PKH1	124	187	200	139	143	109
YDR491C	YDR491C	1	0	0	0	1	2
YDR492W	IZH1	328	396	561	146	256	180
YDR493W	MZM1	158	202	190	182	206	183
YDR494W	RSM28	233	344	305	402	491	278
YDR495C	VPS3	138	169	165	100	126	120
YDR496C	PUF6	1292	1863	2685	1195	1529	1015
YDR497C	ITR1	877	1004	1031	1474	1631	1023
YDR498C	SEC20	121	176	209	132	144	79
YDR499W	LCD1	62	120	93	65	73	61
YDR500C	RPL37B	3934	8923	6883	3066	3254	2553
YDR501W	PLM2	78	172	125	114	152	96
YDR502C	SAM2	3599	3875	3322	2894	3260	1889
YDR503C	LPP1	110	138	129	124	130	75
YDR504C	SPG3	1	2	3	0	2	0
YDR505C	PSP1	465	922	690	563	725	480
YDR506C	GMC1	42	52	42	50	51	23
YDR507C	GIN4	912	1729	1557	1295	1464	1064
YDR508C	GNP1	1914	3063	3041	3175	3540	2267
YDR509W	YDR509W	0	2	0	1	1	3
YDR510W	SMT3	1356	2750	2126	1076	1115	872
YDR510C-A	YDR510C-A	0	0	0	0	0	0
YDR511W	SDH7	104	226	128	217	230	142
YDR512C	EMI1	118	207	189	158	167	95
YDR513W	GRX2	445	859	626	440	549	353
YDR514C	YDR514C	149	226	240	135	183	135
YDR515W	SLF1	153	263	173	154	159	157
YDR516C	EMI2	574	825	606	1270	1307	793
YDR517W	GRH1	398	552	519	395	549	354
YDR518W	EUG1	496	680	627	358	438	307
YDR519W	FPR2	504	659	642	426	433	311
YDR520C	URC2	77	76	109	60	67	40
YDR521W	YDR521W	1	2	0	0	2	4
YDR522C	SPS2	16	124	116	20	30	103
YDR523C	SPS1	7	3	4	10	15	20
YDR524C	AGE1	102	123	151	80	143	84
YDR524W-C	YDR524W-C	0	0	0	0	0	1
YDR524C-B	YDR524C-B	10302	22077	17035	11711	13413	10202
YDR524C-A	YDR524C-A	0	0	0	2	0	1
YDR525W	API2	0	0	0	1	0	0
YDR525W-A	SNA2	208	392	390	519	603	421
YDR526C	YDR526C	1	0	1	2	0	1
YDR527W	RBA50	274	550	511	246	324	263
YDR528W	HLR1	113	211	141	67	95	51
YDR529C	QCR7	698	1489	1062	868	1111	656
YDR530C	APA2	93	178	173	150	181	108
YDR531W	CAB1	325	345	344	232	255	148
YDR532C	KRE28	70	95	112	94	91	62
YDR533C	HSP31	250	349	405	912	1311	774
YDR534C	FIT1	3	7	14	20	25	13
YDR535C	YDR535C	0	0	5	0	0	1
YDR536W	STL1	4	3	0	3	9	8
YDR537C	YDR537C	0	1	0	6	1	2
YDR538W	PAD1	149	211	225	74	66	52
YDR539W	FDC1	396	466	490	359	360	268
YDR540C	IRC4	30	45	50	32	25	5
YDR541C	YDR541C	33	28	29	20	38	21
YDR542W	PAU10	2	0	1	1	3	0
YDR543C	YDR543C	0	0	0	0	0	0
YDR544C	YDR544C	0	0	0	0	0	0
YDR545W	YRF1-1	0	0	0	0	1	0
YDR545C-A	YDR545C-A	0	0	0	0	0	0
YIL177C	YIL177C	0	0	0	0	0	0
YIL177W-A	YIL177W-A	0	0	0	0	0	0
YIL176C	PAU14	0	0	0	0	0	0
YIL173W	VTH1	0	3	0	0	0	2
YIL172C	IMA3	0	0	0	0	0	0
YIL171W-A	YIL171W-A	0	0	0	0	0	0
YIL169C	YIL169C	9	19	12	137	180	134
YIL166C	YIL166C	6	3	10	3	0	11
YIL165C	YIL165C	0	0	0	0	1	1
YIL164C	NIT1	7	7	4	6	9	6
YIL163C	YIL163C	1	0	7	3	2	2
YIL162W	SUC2	241	357	281	200	178	126
YIL161W	YIL161W	80	127	108	78	88	62
YIL160C	POT1	2	6	1	24	25	25
YIL159W	BNR1	89	132	158	83	101	111
YIL158W	AIM20	118	164	162	83	87	61
YIL157C	COA1	213	349	257	393	358	205
YIL156W-A	YIL156W-A	0	1	0	1	1	0
YIL156W-B	YIL156W-B	199	369	261	208	218	220
YIL156W	UBP7	87	121	122	128	188	132
YIL155C	GUT2	124	193	188	326	452	233
YIL154C	YIL154C	215	355	358	428	468	311
YIL153W	RRD1	155	197	182	168	184	128
YIL152W	YIL152W	27	55	22	33	21	20
YIL151C	ESL1	157	153	149	127	178	378
YIL150C	MCM10	78	169	155	44	62	56
YIL149C	MLP2	212	365	483	224	330	232
YIL148W	RPL40A	8245	19822	14983	7098	7802	6508
YIL147C	SLN1	157	237	221	114	164	113
YIL146C	ATG32	25	52	38	46	59	37
YIL145C	PAN6	323	363	413	397	463	278
YIL144W	YIL144W	173	244	306	208	289	162
YIL143C	SSL2	267	503	468	451	536	331
YIL142C-A	YIL142C-A	0	0	0	0	0	3
YIL142W	CCT2	2081	3477	3612	2670	3148	2471
YIL141W	YIL141W	6	12	6	8	8	7
YIL140W	AXL2	609	1076	1058	1281	1674	1285
YIL139C	REV7	34	31	39	1	12	23
YIL138C	TPM2	565	956	797	540	562	355
YIL137C	TMA108	561	809	885	1149	1428	921
YIL136W	OM45	110	195	109	407	714	481
YIL135C	VHS2	321	532	518	408	532	333
YIL134C-A	YIL134C-A	0	0	0	0	0	0
YIL134W	FLX1	40	50	37	22	25	22
YIL133C	RPL16A	7388	12535	11807	5473	5858	3742
YIL132C	CSM2	15	38	28	24	7	19
YIL131C	FKH1	259	327	310	209	249	136
YIL130W	ASG1	260	541	544	281	431	389
YIL129C	TAO3	330	385	507	263	346	222
YIL128W	MET18	441	657	682	445	561	448
YIL127C	RRT14	216	534	648	220	247	199
YIL126W	STH1	687	1105	1159	993	1350	1116
YIL125W	KGD1	966	1208	1236	1411	2215	1315
YIL124W	AYR1	720	971	829	967	1104	758
YIL123W	SIM1	5503	8762	8552	6997	8798	7370
YIL122W	POG1	26	88	101	50	94	80
YIL121W	QDR2	46	65	99	144	205	137
YIL120W	QDR1	10	14	12	5	9	14
YIL119C	RPI1	139	172	180	47	60	31
YIL118W	RHO3	549	767	667	323	467	288
YIL117C	PRM5	307	451	384	1008	1146	824
YIL116W	HIS5	345	351	326	841	837	592
YIL115W-A	YIL115W-A	0	0	3	1	4	9
YIL115C	NUP159	1104	1757	1965	933	1105	801
YIL114C	POR2	97	135	148	80	82	64
YIL113W	SDP1	4	17	4	23	21	10
YIL112W	HOS4	293	558	555	263	265	235
YIL111W	COX5B	106	179	101	116	164	78
YIL110W	HPM1	254	442	398	202	209	126
YIL109C	SEC24	2374	3671	3894	3090	3574	2379
YIL108W	YIL108W	283	409	402	1148	1479	917
YIL107C	PFK26	100	172	135	353	426	270
YIL106W	MOB1	324	571	617	413	528	381
YIL105C	SLM1	214	382	387	323	382	211
YIL105W-A	YIL105W-A	0	1	0	0	0	1
YIL104C	SHQ1	228	362	318	228	279	235
YIL103W	DPH1	259	388	368	199	261	194
YIL102C-A	YIL102C-A	17	36	30	26	16	10
YIL102C	YIL102C	0	0	0	0	0	2
YIL101C	XBP1	21	23	24	112	219	102
YIL100C-A	YIL100C-A	0	1	0	3	3	1
YIL100W	YIL100W	0	0	0	0	2	1
YIL099W	SGA1	2	1	9	9	23	8
YIL098C	FMC1	107	182	156	179	186	106
YIL097W	FYV10	54	63	71	92	90	54
YIL096C	BMT5	101	192	185	63	78	65
YIL095W	PRK1	166	278	300	220	252	201
YIL094C	LYS12	952	1078	991	778	843	499
YIL093C	RSM25	251	325	245	313	369	215
YIL092W	YIL092W	27	44	64	23	38	32
YIL091C	UTP25	476	694	739	495	634	422
YIL090W	ICE2	188	222	298	143	167	156
YIL089W	YIL089W	10	41	38	18	13	10
YIL088C	AVT7	316	363	390	279	333	225
YIL087C	AIM19	61	112	59	74	48	62
YIL086C	YIL086C	0	1	0	1	0	2
YIL085C	KTR7	142	212	291	63	70	47
YIL084C	SDS3	148	210	137	111	129	82
YIL083C	CAB2	271	406	383	217	269	165
YIL082W	YIL082W	0	4	4	0	1	0
YIL079C	AIR1	194	357	301	112	126	118
YIL078W	THS1	6353	11975	12015	6335	7456	5597
YIL077C	YIL077C	37	69	79	85	90	61
YIL076W	SEC28	712	960	896	1227	1337	749
YIL075C	RPN2	1842	1993	2228	3173	3883	2241
YIL074C	SER33	1197	1397	1216	1037	1206	733
YIL073C	SPO22	21	55	46	20	31	258
YIL072W	HOP1	6	11	4	25	14	28
YIL071W-A	YIL071W-A	0	2	1	1	6	2
YIL071C	PCI8	6	22	11	29	30	13
YIL070C	MAM33	664	713	565	1131	1210	663
YIL069C	RPS24B	3045	5996	5132	2745	2915	2331
YIL068W-A	YIL068W-A	0	0	0	0	0	6
YIL068C	SEC6	248	304	287	238	328	178
YIL067C	YIL067C	105	117	137	98	120	68
YIL066W-A	YIL066W-A	0	0	0	1	1	5
YIL066C	RNR3	4	19	18	45	42	37
YIL065C	FIS1	159	251	256	303	369	191
YIL064W	EFM4	194	283	379	117	113	101
YIL063C	YRB2	433	842	741	420	428	336
YIL062C	ARC15	961	1451	1042	1451	1631	1117
YIL061C	SNP1	77	112	117	74	97	60
YIL060W	YIL060W	0	0	0	0	0	0
YIL059C	YIL059C	5	8	7	2	17	3
YIL058W	YIL058W	1	1	2	0	0	1
YIL057C	RGI2	2	1	6	3	1	12
YIL056W	VHR1	167	331	279	178	247	184
YIL055C	YIL055C	41	74	47	71	62	36
YIL054W	YIL054W	0	0	0	2	0	4
YIL053W	YIL053W	8434	12642	11827	7497	8189	6579
YIL052C	RPL34B	5448	11440	9599	3540	3971	2640
YIL051C	MMF1	2079	3266	2470	1821	2024	1374
YIL050W	PCL7	143	281	206	226	231	203
YIL049W	DFG10	35	72	69	38	25	31
YIL048W	NEO1	328	414	464	370	452	261
YIL047C-A	YIL047C-A	0	0	0	0	0	0
YIL047C	SYG1	199	202	281	278	351	245
YIL046W-A	YIL046W-A	0	0	0	0	1	2
YIL046W	MET30	115	266	268	124	198	145
YIL045W	PIG2	47	68	76	66	88	51
YIL044C	AGE2	296	509	457	331	325	315
YIL043C	CBR1	1031	1378	1772	590	601	390
YIL042C	PKP1	47	77	55	74	84	324
YIL041W	GVP36	1296	1928	1984	1658	2223	1575
YIL040W	APQ12	141	292	215	97	102	83
YIL039W	TED1	660	662	723	404	469	300
YIL038C	NOT3	548	936	813	489	631	410
YIL037C	PRM2	18	9	24	21	13	24
YIL036W	CST6	376	766	766	445	565	476
YIL035C	CKA1	288	412	419	349	425	258
YIL034C	CAP2	468	604	520	823	1010	548
YIL033C	BCY1	783	1541	1430	1686	2168	1554
YIL032C	YIL032C	0	0	1	0	0	2
YIL031W	ULP2	58	100	83	73	85	70
YIL030W-A	YIL030W-A	0	0	0	0	0	0
YIL030C	SSM4	798	1051	1206	459	604	467
YIL029W-A	YIL029W-A	0	0	2	0	0	1
YIL029C	YIL029C	0	0	1	2	1	2
YIL028W	YIL028W	0	2	6	1	0	2
YIL027C	YIL027C	204	295	365	183	188	139
YIL026C	IRR1	291	364	443	431	690	395
YIL025C	YIL025C	0	0	0	2	2	8
YIL024C	YIL024C	1	5	4	16	23	15
YIL023C	YKE4	125	186	150	148	199	124
YIL022W	TIM44	566	773	756	761	846	609
YIL021W	RPB3	622	719	755	774	841	526
YIL021C-A	YIL021C-A	0	0	0	0	0	0
YIL020C-A	YIL020C-A	0	0	0	1	2	1
YIL020C	HIS6	232	296	360	234	254	127
YIL019W	FAF1	239	493	612	174	215	202
YIL018W	RPL2B	14709	27940	23937	11753	13580	10098
YIL017C	VID28	51	59	48	123	120	78
YIL016W	SNL1	175	264	229	121	117	72
YIL015W	BAR1	1428	2009	2326	1059	1356	876
YIL014C-A	YIL014C-A	9	11	3	7	14	5
YIL014W	MNT3	163	174	181	84	112	84
YIL013C	PDR11	24	24	36	31	29	40
YIL012W	YIL012W	0	1	0	1	0	1
YIL011W	TIR3	47	98	83	67	82	56
YIL010W	DOT5	296	389	339	292	340	242
YIL009C-A	EST3	59	115	83	41	52	34
YIL009W	FAA3	316	562	571	230	261	215
YIL008W	URM1	254	570	567	196	195	129
YIL007C	NAS2	109	175	134	130	126	94
YIL006W	YIA6	20	27	31	16	30	26
YIL005W	EPS1	327	461	561	350	466	266
YIL004C	BET1	156	310	268	164	145	128
YIL003W	CFD1	100	108	155	59	77	54
YIL002W-A	YIL002W-A	199	271	224	97	108	66
YIL002C	INP51	93	96	108	92	131	63
YIL001W	YIL001W	83	88	100	112	131	71
YIR001C	SGN1	241	436	343	203	216	215
YIR002C	MPH1	146	105	82	61	83	69
YIR003W	AIM21	585	1113	962	962	1140	1130
YIR004W	DJP1	394	866	753	582	567	384
YIR005W	IST3	64	92	64	33	55	31
YIR006C	PAN1	2725	4967	4847	3016	3594	2972
YIR007W	EGH1	79	129	80	168	208	197
YIR008C	PRI1	201	347	346	233	223	136
YIR009W	MSL1	97	143	115	70	81	73
YIR010W	DSN1	141	255	221	104	147	97
YIR011C	STS1	207	394	337	406	419	274
YIR012W	SQT1	1035	1790	1918	1124	1368	1088
YIR013C	GAT4	0	3	3	1	0	2
YIR014W	YIR014W	22	18	35	27	29	26
YIR015W	RPR2	34	92	118	32	42	34
YIR016W	YIR016W	4	8	4	8	14	8
YIR017C	MET28	114	87	133	82	123	46
YIR017W-A	YIR017W-A	6	0	2	2	2	2
YIR018W	YAP5	75	145	115	66	66	37
YIR018C-A	YIR018C-A	0	1	0	0	0	1
YIR019C	YIR019C	18	90	104	9	6	12
YIR020C	YIR020C	0	3	0	0	0	4
YIR020W-A	YIR020W-A	0	0	0	0	0	1
YIR020C-B	YIR020C-B	3	2	1	1	1	6
YIR021W	MRS1	90	175	174	89	111	77
YIR021W-A	YIR021W-A	0	0	1	0	0	0
YIR022W	SEC11	332	431	364	251	294	183
YIR023W	DAL81	207	283	248	125	141	120
YIR023C-A	YIR023C-A	1	0	1	0	1	5
YIR024C	YIR024C	73	104	64	101	107	58
YIR025W	MND2	58	116	77	69	86	48
YIR026C	YVH1	270	346	502	231	243	178
YIR027C	DAL1	3	9	10	8	4	7
YIR028W	DAL4	16	20	5	24	32	26
YIR029W	DAL2	11	14	7	19	12	17
YIR030C	DCG1	64	80	90	28	26	14
YIR030W-A	YIR030W-A	84	0	3	374	187	9
YIR031C	DAL7	14	27	11	17	32	32
YIR032C	DAL3	42	94	43	30	25	26
YIR033W	MGA2	412	504	679	429	472	340
YIR034C	LYS1	492	606	645	596	680	441
YIR035C	YIR035C	248	508	500	262	331	215
YIR036C	IRC24	219	248	171	274	326	172
YIR036W-A	YIR036W-A	0	0	0	0	0	1
YIR037W	HYR1	956	1468	1357	867	962	661
YIR038C	GTT1	226	154	217	261	281	192
YIR039C	YPS6	17	30	28	68	84	42
YIR040C	YIR040C	0	0	0	0	0	0
YIR041W	PAU15	0	0	0	1	0	2
YIR042C	YIR042C	12	32	25	23	15	11
YEL077C	YEL077C	2	8	1	2	4	1
YEL077W-A	YEL077W-A	0	0	0	0	0	0
YEL076C-A	YEL076C-A	0	0	0	0	0	0
YEL076C	YEL076C	0	0	0	0	0	0
YEL075W-A	YEL075W-A	0	0	0	0	0	0
YEL075C	YEL075C	0	0	0	0	0	0
YEL074W	YEL074W	0	0	0	2	0	2
YEL073C	YEL073C	0	2	6	4	14	5
YEL072W	RMD6	25	9	13	10	18	10
YEL071W	DLD3	3088	6790	5141	3700	3918	2862
YEL070W	DSF1	1	5	4	5	5	47
YEL069C	HXT13	0	0	2	0	0	7
YEL068C	YEL068C	40	61	53	21	19	8
YEL067C	YEL067C	0	1	3	0	0	0
YEL066W	HPA3	203	424	363	171	186	153
YEL065W	SIT1	560	1030	1223	694	780	546
YEL064C	AVT2	64	90	80	59	68	56
YEL063C	CAN1	45	70	60	35	40	37
YEL062W	NPR2	81	100	117	92	113	63
YEL061C	CIN8	141	213	166	145	150	97
YEL060C	PRB1	1319	2024	1697	8082	10212	6731
YEL059C-A	SOM1	43	86	83	58	74	59
YEL059W	HHY1	0	0	0	1	0	2
YEL058W	PCM1	861	1203	1337	2008	2174	1552
YEL057C	SDD1	1	0	4	3	4	7
YEL056W	HAT2	195	280	285	213	290	184
YEL055C	POL5	959	897	1379	924	1072	538
YEL054C	RPL12A	6931	16026	13168	5459	6631	4452
YEL053W-A	YEL053W-A	0	1	3	2	1	3
YEL053C	MAK10	134	171	178	137	168	109
YEL052W	AFG1	189	247	285	211	229	169
YEL051W	VMA8	1438	2206	2092	1083	1249	754
YEL050W-A	YEL050W-A	1	0	0	0	1	0
YEL050C	RML2	395	558	400	539	625	456
YEL049W	PAU2	0	0	0	1	4	1
YEL048C	TCA17	66	95	108	21	36	28
YEL047C	YEL047C	681	1000	1096	1545	1787	1085
YEL046C	GLY1	3669	6918	6613	5263	6437	4425
YEL045C	YEL045C	1	3	2	5	0	5
YEL044W	IES6	250	528	469	367	356	291
YEL043W	YEL043W	194	334	352	114	168	127
YEL042W	GDA1	1102	1582	1740	786	1035	689
YEL041W	YEF1	49	81	51	37	65	52
YEL040W	UTR2	2629	4221	4900	2565	2681	2098
YEL039C	CYC7	50	112	70	250	238	172
YEL038W	UTR4	251	330	358	200	232	162
YEL037C	RAD23	1727	3256	2924	1785	2175	1671
YEL036C	ANP1	287	420	454	352	456	316
YEL035C	UTR5	0	0	0	0	0	1
YEL034C-A	YEL034C-A	1	0	0	0	0	2
YEL034W	HYP2	30152	58436	49820	23519	26364	18440
YEL033W	MTC7	17	15	12	16	29	17
YEL032W	MCM3	356	578	732	596	760	538
YEL032C-A	YEL032C-A	0	0	0	1	0	0
YEL031W	SPF1	2386	3269	3590	1891	2389	1807
YEL030C-A	YEL030C-A	0	0	0	0	0	0
YEL030W	ECM10	53	61	47	46	81	74
YEL029C	BUD16	94	131	129	76	77	87
YEL028W	YEL028W	0	4	3	3	6	1
YEL027W	VMA3	6136	8653	8531	4621	4858	3210
YEL026W	SNU13	2548	7569	6747	1996	2436	2345
YEL025C	YEL025C	54	75	74	36	50	47
YEL024W	RIP1	943	1776	1312	1557	1968	1250
YEL023C	YEL023C	4	3	4	4	7	9
YEL022W	GEA2	478	669	715	541	793	591
YEL021W	URA3	481	807	784	404	461	330
YEL020C-B	YEL020C-B	0	2	0	0	0	4
YEL020W-A	TIM9	803	1410	1096	1099	1039	789
YEL020C	PXP1	35	27	28	48	93	48
YEL019C	MMS21	32	71	81	35	46	44
YEL018C-A	YEL018C-A	0	0	0	0	1	5
YEL018W	EAF5	88	218	235	99	91	80
YEL017C-A	PMP2	1405	1935	1734	1036	1074	686
YEL017W	GTT3	270	493	410	304	351	351
YEL016C	NPP2	34	40	30	14	23	17
YEL015W	EDC3	593	875	863	454	597	422
YEL014C	YEL014C	0	1	0	1	0	1
YEL013W	VAC8	989	1570	1297	1065	1741	2671
YEL012W	UBC8	88	154	124	180	204	141
YEL011W	GLC3	75	133	99	563	758	506
YEL010W	YEL010W	1	1	0	0	0	3
YEL009C-A	YEL009C-A	1	4	9	1	1	9
YEL009C	GCN4	361	473	455	334	481	332
YEL008W	YEL008W	0	0	1	2	0	2
YEL008C-A	YEL008C-A	0	0	0	0	0	3
YEL007W	MIT1	528	1012	1073	550	710	450
YEL006W	YEA6	90	130	113	40	64	36
YEL005C	VAB2	28	26	40	21	16	26
YEL004W	YEA4	68	72	73	36	29	43
YEL003W	GIM4	222	365	332	144	180	99
YEL002C	WBP1	1278	1697	1709	1017	1123	618
YEL001C	IRC22	784	929	872	675	763	391
YER001W	MNN1	887	1510	1858	876	1164	838
YER002W	NOP16	575	1394	1400	768	897	779
YER003C	PMI40	1941	2708	2770	2699	3351	2131
YER004W	FMP52	376	596	505	512	574	451
YER005W	YND1	145	118	180	87	101	92
YER006W	NUG1	1283	2027	2569	2144	2516	1537
YER006C-A	YER006C-A	0	3	0	0	2	2
YER007W	PAC2	53	64	49	27	26	23
YER007C-A	TMA20	834	1415	1287	611	624	485
YER008C	SEC3	617	322	521	1962	2731	389
YER009W	NTF2	2815	5812	4860	2238	2583	1778
YER010C	YER010C	112	123	135	108	97	63
YER011W	TIR1	62	162	131	59	80	395
YER012W	PRE1	694	1031	899	762	1025	680
YER013W	PRP22	218	292	330	192	253	212
YER014W	HEM14	152	156	185	177	195	220
YER014C-A	BUD25	0	1	0	1	0	0
YER015W	FAA2	40	60	105	86	77	91
YER016W	BIM1	219	222	274	240	229	140
YER017C	AFG3	332	459	392	353	510	302
YER018C	SPC25	95	115	107	149	157	96
YER019W	ISC1	254	289	333	275	327	159
YER019C-A	SBH2	590	1202	1001	533	529	434
YER020W	GPA2	183	365	354	250	256	177
YER021W	RPN3	916	1221	1134	1193	1440	920
YER022W	SRB4	268	422	468	390	405	338
YER023W	PRO3	1821	2143	2083	1234	1468	1129
YER023C-A	YER023C-A	2	5	4	5	2	8
YER024W	YAT2	13	27	23	71	111	73
YER025W	GCD11	4073	6699	7479	3831	4377	3519
YER026C	CHO1	830	1175	1031	1768	1885	1186
YER027C	GAL83	676	1176	1004	650	673	515
YER028C	MIG3	62	71	85	65	83	46
YER029C	SMB1	170	292	257	220	229	110
YER030W	CHZ1	394	719	529	330	359	311
YER031C	YPT31	645	785	881	591	649	403
YER032W	FIR1	240	494	417	190	270	241
YER033C	ZRG8	86	114	90	117	152	120
YER034W	YER034W	88	222	236	168	167	176
YER035W	EDC2	138	416	322	430	528	349
YER036C	ARB1	3008	3548	4339	2300	2623	1373
YER037W	PHM8	563	596	539	1243	1252	781
YER038C	KRE29	36	60	34	16	13	21
YER038W-A	FMP49	5	2	1	3	2	1
YER039C	HVG1	1	5	0	2	4	2
YER039C-A	YER039C-A	6	21	12	6	11	3
YER040W	GLN3	179	341	301	130	141	104
YER041W	YEN1	46	26	28	20	17	32
YER042W	MXR1	779	971	719	316	401	290
YER043C	SAH1	10052	14754	17576	9060	10616	5682
YER044C	ERG28	684	891	709	380	396	238
YER044C-A	MEI4	3	1	3	6	4	14
YER045C	ACA1	78	123	112	197	252	173
YER046W	SPO73	18	50	29	47	50	32
YER046W-A	YER046W-A	0	0	0	0	0	0
YER047C	SAP1	129	159	177	157	171	118
YER048C	CAJ1	734	1348	1285	978	1092	770
YER048W-A	ISD11	273	515	433	361	399	235
YER049W	TPA1	1277	1849	2285	892	1155	771
YER050C	RSM18	324	557	349	446	407	297
YER051W	JHD1	26	76	63	24	45	32
YER052C	HOM3	1729	1638	1607	1290	1516	896
YER053C	PIC2	105	175	107	327	432	252
YER053C-A	YER053C-A	158	175	169	577	553	354
YER054C	GIP2	19	24	19	36	54	49
YER055C	HIS1	1694	1894	2216	1835	2281	1264
YER056C	FCY2	2136	3504	3016	1475	1793	1481
YER056C-A	RPL34A	4004	8899	6898	3344	3727	2578
YER057C	HMF1	947	1863	1521	711	847	650
YER058W	PET117	40	47	26	45	57	28
YER059W	PCL6	153	318	246	204	243	173
YER060W	FCY21	167	121	142	62	71	59
[truncated: 4,614 more rows]

## Sheet: TE up
This list comprises the 155 genes whose Tes were upregulated in the def1 KO condition by 1.5 fold and p<0.005
	Upregulated (TE FC > 1.5, p<0.005)
	name	gene
	YBR008C	FLR1
	YBL075C	SSA3
	YMR096W	SNZ1
	YAL034C	FUN19
	YJR152W	DAL5
	YDR406W	PDR15
	YER024W	YAT2
	YDL215C	GDH2
	YGR127W	YGR127W
	YGR032W	GSC2
	YPR184W	GDB1
	YHR033W	YHR033W
	YAL029C	MYO4
	YDL204W	RTN2
	YPR027C	YPR027C
	YEL030W	ECM10
	YJL153C	INO1
	YOL113W	SKM1
	YDR457W	TOM1
	YOR120W	GCY1
	YOL011W	PLB3
	YBR097W	VPS15
	YBR208C	DUR1
	YKL176C	LST4
	YJL129C	TRK1
	YOR381W	FRE3
	YDR270W	CCC2
	YCR032W	BPH1
	YNL106C	INP52
	YOR249C	APC5
	YKL086W	SRX1
	YGR157W	CHO2
	YJR149W	YJR149W
	YDR242W	AMD2
	YGR201C	YGR201C
	YOR010C	TIR2
	YCL004W	PGS1
	YJR138W	IML1
	YML002W	YML002W
	YGL094C	PAN2
	YLR024C	UBR2
	YHR119W	SET1
	YOL081W	IRA2
	YOL055C	THI20
	YOR112W	CEX1
	YKL124W	SSH4
	YNL262W	POL2
	YER155C	BEM2
	YNR057C	BIO4
	YNL242W	ATG2
	YMR232W	FUS2
	YEL020C	PXP1
	YOR147W	MDM32
	YMR169C	ALD3
	YAL062W	GDH3
	YLR273C	PIG1
	YER186C	YER186C
	YJL112W	MDV1
	YDR009W	GAL3
	YEL033W	MTC7
	YLR305C	STT4
	YGR271W	SLH1
	YGR088W	CTT1
	YER103W	SSA4
	YML059C	NTE1
	YNR059W	MNT4
	Q0050	AI1
	YPR127W	YPR127W
	YPL082C	MOT1
	YDL223C	HBT1
	YCR021C	HSP30
	YKL010C	UFD4
	YLR456W	YLR456W
	YHR071W	PCL5
	YGL150C	INO80
	YNR062C	YNR062C
	YOR003W	YSP3
	YKR067W	GPT2
	YML128C	MSC1
	YKR054C	DYN1
	YER015W	FAA2
	YIR029W	DAL2
	YDR104C	SPO71
	YLR144C	ACF2
	YFL031W	HAC1
	YJL207C	LAA1
	YMR087W	YMR087W
	YCR014C	POL4
	YKL129C	MYO3
	YBR302C	COS2
	YPR055W	SEC8
	YOR022C	DDL1
	YBR276C	PPS1
	YER065C	ICL1
	YGL096W	TOS8
	YCR007C	YCR007C
	YEL011W	GLC3
	YOR305W	RRG7
	YJL005W	CYR1
	YOR328W	PDR10
	YLR422W	DCK1
	YGL124C	MON1
	YMR252C	YMR252C
	YDR235W	PRP42
	YGR043C	NQM1
	YDR453C	TSA2
	YHL032C	GUT1
	YOL140W	ARG8
	YGR112W	SHY1
	YHL030W	ECM29
	YLR152C	YLR152C
	YDL058W	USO1
	YPR021C	AGC1
	YNL172W	APC1
	YMR280C	CAT8
	YOR093C	CMR2
	YOR370C	MRS6
	YIL071C	PCI8
	YMR306W	FKS3
	YNL009W	IDP3
	YDR218C	SPR28
	YIR031C	DAL7
	YKR009C	FOX2
	YNL273W	TOF1
	YGL140C	YGL140C
	YNL279W	PRM1
	YCR035C	RRP43
	YGR287C	IMA1
	YPL164C	MLH3
	YJR039W	YJR039W
	YNL250W	RAD50
	YML054C	CYB2
	YOR011W	AUS1
	YKR061W	KTR2
	YPL109C	YPL109C
	YIL037C	PRM2
	Q0045	COX1
	YHR186C	KOG1
	YOR291W	YPK9
	YLR446W	YLR446W
	YLR106C	MDN1
	YNL144C	YNL144C
	YJR132W	NMD5
	YGR099W	TEL2
	YMR207C	HFA1
	YNL169C	PSD1
	YJR161C	COS5
	YLL063C	AYT1
	YPL020C	ULP1
	YPR117W	YPR117W
	YBR295W	PCA1
	YCR075W-A	EGO2
	YOL087C	DUF1
	YLL015W	BPT1
	YHR210C	YHR210C

## Sheet: TE down
This list comprises the genes whose TEs were downregulated in the def1 condition by 1.5fold and p<0.005
	Downregulated TE FC>1.5 p<0.005
	name	gene
	YJL052W	TDH1
	YOR355W	GDS1
	YDL203C	ACK1
	YBL095W	MRX3
	YDL125C	HNT1
	YKL163W	PIR3
	YNL286W	CUS2
	YLR452C	SST2
	YKL186C	MTR2
	YLR429W	CRN1
	YBL060W	YEL1
	YML097C	VPS9
	YKL025C	PAN3
	YIL023C	YKE4
	YFR046C	CNN1
	YJR147W	HMS2
	YLR325C	RPL38
	YBR004C	GPI18
	YIR023W	DAL81
	YIL138C	TPM2
	YOR377W	ATF1
	YHR057C	CPR2
	YGL044C	RNA15
	YCR003W	MRPL32
	YGL049C	TIF4632
	YBR154C	RPB5
	YGR179C	OKP1
	YGL215W	CLG1
	YMR273C	ZDS1
	YOR103C	OST2
	YGL023C	PIB2

## Sheet: WT_def1_cds_start_pos
Position	WT	def1
1	0.884894	1.57409
2	0.380197	0.441808
3	0.347032	0.344555
4	0.535126	0.583013
5	1.0139	1.23387
6	0.551698	0.596919
7	0.530125	0.532233
8	0.419573	0.583356
9	0.511086	0.613062
10	0.621562	0.758523
11	0.592663	0.745237
12	0.670591	0.777016
13	0.756347	0.789692
14	0.848323	0.856879
15	0.879879	0.965269
16	0.969382	1.05791
17	1.08256	1.13882
18	1.17396	1.09077
19	1.24139	1.18563
20	1.30619	1.22882
21	1.43613	1.27786
22	1.36543	1.26205
23	1.41348	1.38707
24	1.49107	1.3904
25	1.59234	1.50311
26	1.52281	1.33458
27	1.53476	1.41983
28	1.50711	1.4084
29	1.5437	1.51072
30	1.63876	1.53927
31	1.67268	1.48177
32	1.75527	1.56149
33	1.65516	1.55062
34	1.77424	1.50045
35	1.8603	1.57955
36	1.77456	1.63293
37	1.73723	1.55501
38	1.89592	1.65591
39	1.76356	1.60198
40	1.72	1.4775
41	1.81536	1.53703
42	1.73473	1.46301
43	1.67703	1.44942
44	1.68081	1.48999
45	1.6097	1.48504
46	1.63378	1.46593
47	1.68559	1.5169
48	1.64289	1.45869
49	1.64939	1.44929
50	1.64218	1.40814
51	1.58839	1.38452
52	1.46805	1.35472
53	1.56894	1.49862
54	1.52238	1.32386
55	1.55776	1.37771
56	1.43449	1.40441
57	1.54048	1.48118
58	1.59176	1.47734
59	1.52762	1.4203
60	1.60993	1.42908
61	1.5919	1.4118
62	1.63808	1.36531
63	1.55533	1.43043
64	1.43641	1.3605
65	1.44311	1.35719
66	1.54982	1.43942
67	1.5176	1.41953
68	1.55511	1.41821
69	1.51018	1.32807
70	1.50008	1.36815
71	1.56099	1.36541
72	1.46905	1.38564
73	1.43753	1.31902
74	1.40786	1.316
75	1.52367	1.37446
76	1.48318	1.41833
77	1.49825	1.4115
78	1.48001	1.41991
79	1.34946	1.21486
80	1.46133	1.26633
81	1.48242	1.27143
82	1.45385	1.29067
83	1.40075	1.25822
84	1.37629	1.35061
85	1.36378	1.37306
86	1.37569	1.3889
87	1.35835	1.22663
88	1.34045	1.30166
89	1.49775	1.30906
90	1.36635	1.24447
91	1.31768	1.22463
92	1.39089	1.28934
93	1.35942	1.29419
94	1.42656	1.26171
95	1.3348	1.12176
96	1.23669	1.21343
97	1.34418	1.26746
98	1.28816	1.25444
99	1.23806	1.31548
100	1.29248	1.18331
101	1.29125	1.21748
102	1.21748	1.18
103	1.28898	1.24871
104	1.36787	1.2079
105	1.26728	1.20879
106	1.33834	1.19636
107	1.18061	1.29016
108	1.30345	1.30425
109	1.31662	1.19707
110	1.26779	1.25736
111	1.21778	1.16914
112	1.3759	1.17649
113	1.33214	1.2003
114	1.27383	1.22352
115	1.25744	1.22076
116	1.22015	1.14136
117	1.15611	1.20267
118	1.28659	1.18036
119	1.1679	1.13523
120	1.19635	1.11333
121	1.21403	1.16155
122	1.0901	1.06004
123	1.27509	1.16069
124	1.17319	1.10766
125	1.14789	1.12186
126	1.27598	1.15917
127	1.11239	1.09106
128	1.19759	1.08633
129	1.08852	1.09759
130	1.09719	1.0211
131	1.06052	1.09599
132	1.15308	1.20167
133	1.11904	1.0308
134	1.13598	1.12667
135	1.18693	1.17249
136	1.12801	1.09647
137	1.09505	1.14237
138	1.1534	1.07562
139	1.13426	1.10439
140	1.11677	1.03858
141	1.10779	1.12496
142	1.0595	1.17215
143	1.14609	1.08877
144	1.02639	1.11297
145	1.06389	1.05622
146	1.07586	1.10673
147	1.11732	1.04894
148	1.12629	1.04782
149	1.13402	1.08221
150	1.08759	1.06751
151	1.12863	1.08059
152	1.15812	1.08399
153	1.07106	1.09663
154	1.08609	1.04437
155	1.05992	1.03743
156	1.0202	1.0359
157	1.00291	1.09652
158	1.16468	0.980362
159	1.17211	0.976576
160	1.15985	1.11827
161	1.05733	1.01724
162	1.07066	1.02177
163	1.09148	1.01469
164	0.994717	1.05088
165	1.04592	1.04865
166	1.11411	1.03911
167	1.08596	0.920155
168	1.07407	1.06081
169	1.00064	1.02225
170	1.01368	1.04925
171	0.935278	1.04965
172	1.02862	1.05574
173	0.999365	0.993043
174	0.995475	1.01106
175	1.05363	1.078
176	1.07637	1.10027
177	1.06209	0.997532
178	0.900293	1.00856
179	1.0005	0.999455
180	1.00282	1.03327
181	0.968077	0.935581
182	0.989737	0.990851
183	0.988596	1.01563
184	1.05931	0.979519
185	0.978206	0.98644
186	0.995263	0.937163
187	1.02914	0.923406
188	0.989537	0.96226
189	0.984925	0.98385
190	0.912416	0.967013
191	0.958855	0.944394
192	0.989102	0.999279
193	1.01289	0.956049
194	0.913776	0.973037
195	0.955808	1.06224
196	0.976151	0.959878
197	0.926225	0.942141
198	0.932249	0.914205
199	1.04213	0.986204
200	0.998278	0.89817
201	0.962433	1.01937
202	0.891146	0.923399
203	1.00825	0.994138
204	1.04634	1.04622
205	0.944272	0.996095
206	1.01002	0.980916
207	0.961526	0.972486
208	0.985583	1.02798
209	0.983441	1.10446
210	0.909209	0.913905
211	1.04291	0.944361
212	1.03934	1.00665
213	0.934828	0.960033
214	1.01265	0.984516
215	0.955433	1.0065
216	0.974083	0.924669
217	0.949103	0.925067
218	0.848695	0.892709
219	1.00977	0.99773
220	0.988699	0.939608
221	0.979949	0.986439
222	0.962722	0.985806
223	0.902885	1.009
224	0.882728	0.997819
225	0.934095	0.906737
226	0.941871	0.973293
227	0.899004	0.914412
228	1.02797	1.01424
229	0.978561	1.03529
230	0.993564	1.00257
231	0.990736	0.967241
232	0.974155	0.928431
233	0.935854	0.940766
234	1.00043	1.014
235	0.946011	0.964789
236	1.01561	0.881008
237	0.859778	0.884742
238	0.848785	0.944299
239	0.909542	0.997999
240	0.984268	0.930458
241	1.00709	1.00274
242	0.904796	0.883435
243	0.940613	0.981351
244	0.899288	0.973124
245	1.00757	0.962436
246	0.96417	0.956994
247	0.985465	0.981347
248	0.930362	0.979052
249	0.956713	0.889452
250	0.903976	0.855452
251	0.959282	1.06133
252	0.90754	0.883705
253	0.915982	0.939573
254	0.95577	0.966264
255	0.881107	1.01615
256	0.992428	0.916766
257	0.873143	0.958174
258	0.838616	0.908298
259	0.926004	0.931006
260	0.860469	0.898863
261	1.00822	0.867949
262	0.943426	0.915283
263	0.995044	0.89292
264	0.873113	0.931163
265	0.93097	0.89763
266	0.916169	0.981635
267	0.916507	0.932907
268	0.889757	0.977608
269	1.0018	0.874365
270	0.956135	0.983451
271	0.90766	0.857504
272	0.921307	0.955596
273	0.89657	0.899272
274	0.92419	0.987199
275	0.887279	0.999921
276	0.918194	0.954058
277	0.878293	0.861182
278	0.853523	0.91138
279	0.813236	0.833114
280	0.966408	0.924307
281	0.862273	0.8916
282	0.942231	0.954184
283	0.79811	0.880637
284	0.96846	0.892293
285	0.850829	0.975204
286	0.840738	0.887418
287	0.901145	0.836667
288	0.84661	1.03093
289	0.796943	0.953312
290	0.860652	0.908986
291	0.934266	0.921559
292	0.909656	0.955666
293	0.829191	0.916016
294	0.885117	0.918973
295	0.865176	0.911813
296	0.95937	0.95634
297	0.839367	0.940485
298	0.897638	0.956838
299	0.864804	0.977236
300	0.890818	0.878234
301	0.841202	0.855632
302	0.858686	0.942425
303	0.854514	0.991756
304	0.950244	0.946366
305	0.882229	0.956342
306	0.793169	0.870323
307	0.876307	0.866364
308	0.94158	0.955482
309	0.935329	0.912337
310	0.866416	0.79276
311	0.887886	0.905235
312	0.894959	0.933557
313	0.772645	0.878243
314	0.894297	0.941367
315	0.895829	0.837599
316	0.802017	0.857717
317	0.964163	0.904051
318	1.01999	0.8754
319	0.792378	0.864245
320	0.859678	0.877458
321	0.853379	0.906581
322	0.973018	0.948907
323	0.847533	0.879743
324	0.868617	0.927301
325	0.849527	0.953069
326	0.890592	0.919261
327	0.861571	0.858898
328	0.827056	0.88348
329	0.853904	0.875955
330	0.797361	0.874743
331	0.85006	0.931297
332	0.906849	0.910833
333	0.885582	0.889729
334	0.857861	0.925548
335	0.909976	0.982757
336	0.847127	0.868369
337	0.950145	0.998885
338	0.842369	0.931816
339	0.858788	0.981974
340	0.813612	0.924323
341	0.791038	0.898458
342	0.83106	0.873634
343	0.904749	1.05301
344	0.840309	0.930795
345	0.768192	0.940902
346	0.88637	0.952918
347	0.882012	0.887092
348	0.909409	0.898912
349	0.827021	0.907539
350	0.791343	0.882686
351	0.948901	0.881885
352	0.899498	1.00647
353	0.839533	1.03922
354	0.845785	0.877331
355	0.824161	0.934357
356	0.920525	0.913573
357	0.896319	0.962332
358	0.877442	0.880821
359	0.815612	0.881007
360	0.87509	0.831686
361	0.844586	0.885207
362	0.857688	0.786265
363	0.886578	0.882985
364	0.865136	0.788656
365	0.925737	0.863945
366	0.857108	0.805979
367	0.895134	0.952623
368	0.818449	0.900958
369	0.809622	0.921613
370	0.864663	0.871857
371	0.866139	0.870964
372	0.814195	0.877347
373	0.808964	0.95427
374	0.850089	0.849883
375	0.813547	0.892005
376	0.841159	0.916448
377	0.797912	0.852296
378	0.888961	0.848834
379	0.851663	0.88281
380	0.875302	1.00806
381	0.77174	0.906538
382	0.878756	0.859743
383	0.849835	0.907952
384	0.860356	0.871108
385	0.931294	0.887427
386	0.835068	0.850333
387	0.796226	0.777592
388	0.868268	0.89847
389	0.871724	0.910884
390	0.790702	0.847455
391	0.861799	0.866521
392	0.838939	0.857141
393	0.876138	0.910057
394	0.837166	0.86703
395	0.900622	0.967061
396	0.832351	0.936378
397	0.869411	0.83626
398	0.775511	0.960405
399	0.924626	0.907971
400	0.883561	1.01578
401	1.01726	0.926777
402	0.877966	0.909357
403	0.889573	0.855754
404	0.901979	0.747789
405	0.910266	0.90071
406	0.966664	0.828787
407	0.866986	0.943907
408	0.850538	0.865497
409	0.721616	0.880862
410	0.833465	0.806146
411	0.872333	0.848607
412	0.777111	0.862351
413	0.822222	0.822224
414	0.773939	0.920728
415	0.758918	0.86364
416	0.833545	0.884203
417	0.866576	0.845367
418	0.939963	0.836254
419	0.784011	0.907671
420	0.96257	0.895371
421	0.84439	0.897405
422	0.816798	0.886008
423	0.865521	0.951547
424	0.891363	0.869442
425	0.851245	0.831145
426	0.908746	0.795519
427	0.841943	0.820596
428	0.763068	0.892188
429	0.789504	0.794644
430	0.765436	0.894645
431	0.831748	0.908786
432	0.730251	0.858573
433	0.855662	0.900451
434	0.826406	0.838547
435	0.768064	0.908851
436	0.796048	0.931443
437	0.837316	0.896064
438	0.838613	0.796109
439	0.746963	0.960863
440	0.847043	0.967312
441	0.782462	0.837654
442	0.70209	0.911908
443	0.803789	0.861831
444	0.85534	0.838455
445	0.892149	0.839016
446	0.857318	0.899354
447	0.819297	0.921616
448	0.795447	0.876067
449	0.79924	0.833858
450	0.752863	0.945769
451	0.762812	0.904575
452	0.786243	0.914563
453	0.827579	0.895092
454	0.820774	0.990572
455	0.781583	0.86123
456	1.09506	1.06079
457	0.864498	0.869972
458	0.684262	0.802835
459	0.815516	0.946382
460	0.840912	0.853538
461	0.806703	0.815748
462	0.7652	0.883059
463	0.821608	0.846812
464	0.84268	0.893595
465	0.915707	0.867139
466	0.86128	0.820805
467	0.803658	0.816454
468	0.814557	0.83827
469	0.922563	0.895306
470	0.855233	0.858947
471	0.910705	0.985867
472	0.785899	0.880349
473	0.832434	0.851951
474	0.751167	0.897864
475	0.866775	0.827879
476	0.922341	0.917555
477	0.761588	0.785748
478	0.970016	0.828059
479	0.830095	0.786938
480	0.725845	0.891123
481	0.851192	0.869004
482	0.910067	0.914966
483	0.846245	0.740891
484	0.843698	0.811106
485	0.802882	0.813056
486	0.818728	0.990265
487	0.817439	0.986109
488	0.898658	0.787851
489	0.912956	1.00661
490	0.767563	0.893277
491	0.755057	0.800687
492	0.91413	0.857885
493	0.92559	0.987881
494	0.756905	0.834125
495	0.81901	0.980111
496	0.836777	0.943993
497	0.925952	0.952827
498	0.785765	0.734704
499	0.929248	0.914145
500	0.801668	0.902982
501	0.754147	1.03669

## Sheet: WT_def1_cds_stop_pos
Position	WT	def1
1	1.16539	1.10064
2	1.10417	1.05231
3	1.20479	1.14502
4	1.08652	1.0369
5	1.17363	1.06884
6	1.21656	1.01569
7	0.94412	0.929007
8	1.26327	1.23916
9	1.15539	1.11499
10	1.18196	1.09695
11	1.01448	0.918925
12	1.20356	1.17232
13	1.07133	1.09533
14	1.1917	1.14387
15	1.11978	1.18271
16	1.15591	1.01254
17	1.1576	1.04687
18	1.0441	1.02384
19	1.30605	1.18333
20	0.996908	1.09333
21	1.05555	1.01133
22	1.19841	0.980885
23	1.02902	1.02718
24	1.23615	1.19965
25	1.12208	1.06978
26	1.12489	1.04731
27	1.18475	1.08147
28	1.32985	1.20708
29	0.873012	1.00141
30	1.11726	1.04327
31	1.11703	1.11714
32	1.15129	1.08669
33	1.18013	0.971403
34	1.14578	0.950067
35	1.20579	1.23038
36	1.22554	1.20194
37	1.03085	1.02648
38	1.17717	1.15007
39	0.975931	1.09543
40	1.16214	1.02305
41	1.10477	1.01371
42	1.12227	0.980093
43	1.01089	0.967778
44	1.04839	1.00177
45	1.05013	0.990243
46	1.1955	1.20039
47	1.08044	1.24627
48	1.13263	1.07536
49	1.11231	1.18856
50	0.967183	0.955698
51	1.10858	1.07384
52	1.22352	0.987214
53	1.19807	1.28355
54	1.07456	1.09218
55	1.07188	1.1044
56	1.17898	1.06127
57	1.08627	1.12732
58	1.21833	1.17781
59	1.11239	1.03698
60	1.04734	0.927512
61	1.06153	1.06406
62	1.04772	1.03597
63	1.01929	1.13937
64	1.18535	1.09904
65	1.11383	0.971107
66	1.06983	1.08265
67	1.17115	1.08148
68	1.08849	1.14338
69	1.15073	1.23805
70	1.0894	1.22507
71	1.0048	1.14368
72	1.19123	1.09866
73	1.1323	0.982671
74	1.04342	1.10819
75	0.984867	1.03682
76	1.18461	0.975959
77	1.22906	1.10465
78	1.01557	1.03479
79	0.979019	1.11425
80	1.13838	1.08819
81	1.00328	1.04182
82	1.09612	1.09892
83	1.04093	1.06219
84	0.930073	1.06291
85	1.11447	1.05316
86	0.984164	0.989156
87	1.08081	1.08561
88	0.975441	1.07097
89	1.1693	1.17419
90	0.992081	0.991488
91	1.095	1.11552
92	1.08326	1.01819
93	1.05279	1.00123
94	1.19843	1.08602
95	1.07557	1.16861
96	1.08044	1.16033
97	1.0202	1.11333
98	1.12745	1.10353
99	1.08641	1.11355
100	1.19461	1.09078
101	1.00245	1.09741
102	1.13289	1.01788
103	1.11235	1.12787
104	1.13115	1.0842
105	0.991162	1.04896
106	1.06403	0.992332
107	1.01079	1.02527
108	1.0496	1.03248
109	1.02157	0.987357
110	1.00937	1.01588
111	1.03107	1.05723
112	1.0511	1.00588
113	1.02006	1.03021
114	1.04518	1.0703
115	1.04128	1.05302
116	1.10895	1.01242
117	0.928804	0.893246
118	1.06707	0.945883
119	1.00674	0.988908
120	1.0044	1.07307
121	1.0253	0.980984
122	1.06216	1.0062
123	1.0166	1.01869
124	1.00562	0.983883
125	0.923774	1.04668
126	0.978441	0.860507
127	1.13045	1.05798
128	1.08074	1.02899
129	1.06094	1.13724
130	1.06041	0.966513
131	1.12678	1.00058
132	0.955045	1.10356
133	1.03464	0.977827
134	1.03269	0.964501
135	1.14662	0.977887
136	0.97642	1.16077
137	1.06083	1.04229
138	1.02026	1.02376
139	1.07003	1.01154
140	1.00994	0.974399
141	1.00574	1.03691
142	1.04993	0.999457
143	1.06173	1.05559
144	0.978986	1.08992
145	0.943613	0.943142
146	1.13126	1.09831
147	1.02447	1.06496
148	1.09236	0.983493
149	0.95355	1.11021
150	1.08289	1.04441
151	1.04808	0.966541
152	1.10873	1.08702
153	1.02081	1.06867
154	1.06984	1.07318
155	1.07833	0.917964
156	0.915285	0.986175
157	1.04915	0.987814
158	1.06451	1.09941
159	1.07705	1.00807
160	1.02277	1.16578
161	1.01925	0.956678
162	1.1031	1.04861
163	1.03793	1.01547
164	1.02461	1.00074
165	1.10702	0.996292
166	0.996121	1.04683
167	1.03566	0.960954
168	1.06542	0.97714
169	1.08433	1.00925
170	1.15506	1.08651
171	1.03662	1.03237
172	0.947697	0.976263
173	0.991019	0.931732
174	1.08572	1.1041
175	0.986818	1.08432
176	0.934423	1.04218
177	1.04891	1.03462
178	1.08435	1.01377
179	1.07086	0.94961
180	0.947362	1.11607
181	0.907815	0.950084
182	1.02728	1.03118
183	1.04177	1.08693
184	0.980147	1.03644
185	1.00551	1.04995
186	0.960061	0.999839
187	0.884629	0.987098
188	0.981973	0.89148
189	0.969245	0.979191
190	0.973293	0.987708
191	0.910227	0.879166
192	1.00764	1.06658
193	1.01904	0.986258
194	1.02874	0.957766
195	0.998681	1.01478
196	1.07246	1.08208
197	1.08707	1.0257
198	1.00853	1.07574
199	1.08335	1.04161
200	1.01965	1.00449
201	1.00614	0.955083
202	1.038	1.01015
203	1.07312	0.988067
204	0.891911	1.00282
205	1.01111	0.995896
206	1.02334	1.07009
207	0.975196	1.03003
208	0.982022	1.06357
209	1.03942	0.983287
210	1.02683	1.05816
211	0.983291	0.975252
212	1.0158	1.03342
213	0.956576	1.00785
214	0.970882	1.00141
215	0.965854	0.99275
216	0.981698	0.972418
217	0.916669	0.970542
218	0.95733	0.966251
219	0.997992	0.995617
220	0.934125	0.900198
221	0.941965	0.903891
222	0.945302	0.908657
223	1.00238	1.04291
224	0.953595	0.934665
225	1.07382	0.930711
226	0.979467	0.924215
227	0.985826	0.953937
228	0.930168	0.927018
229	1.02102	0.960506
230	1.00019	0.893458
231	0.885284	0.95029
232	0.949002	0.951878
233	0.90656	0.920027
234	0.959115	0.972896
235	0.980544	0.907274
236	0.977035	0.965392
237	0.931257	0.917642
238	1.02781	1.06548
239	1.0033	0.912556
240	1.03005	0.950339
241	1.03909	0.916149
242	1.04303	0.971796
243	0.996376	0.988968
244	0.977988	1.09511
245	0.965238	1.02148
246	1.01982	1.01355
247	0.992617	1.03739
248	0.975764	0.926732
249	0.987276	0.992284
250	0.935753	0.963833
251	0.927643	0.94656
252	0.889593	0.971633
253	0.977072	0.926134
254	0.986522	0.927524
255	0.915693	0.930055
256	0.841731	0.907578
257	1.04455	0.9588
258	0.953332	0.892673
259	0.897858	0.945035
260	0.904014	0.86733
261	0.914536	0.938511
262	0.893861	0.964848
263	0.989388	0.991708
264	0.921969	0.957562
265	0.883703	0.976068
266	1.03272	0.98515
267	0.962641	1.01092
268	0.939601	1.0322
269	0.881959	0.936493
270	0.906533	0.936278
271	0.894833	0.935619
272	0.856613	0.920911
273	0.888945	0.969182
274	0.924474	0.898327
275	0.924443	0.997513
276	0.942254	0.949919
277	0.913013	0.919943
278	0.933682	0.928331
279	0.967298	1.00874
280	1.06448	1.05634
281	1.03804	0.952208
282	1.03687	1.09304
283	0.915873	0.963812
284	0.938934	1.00587
285	1.04706	0.944938
286	0.896578	0.882856
287	0.927707	0.948926
288	0.881831	0.938036
289	0.935992	0.937755
290	0.965312	0.920149
291	0.883604	0.844213
292	0.932148	0.85873
293	0.935435	0.940922
294	0.935794	0.947022
295	0.84429	0.953914
296	0.856964	0.868942
297	0.997563	1.00826
298	0.89704	0.96514
299	0.915416	0.891153
300	0.81391	0.939043
301	0.909044	0.993669
302	0.909184	0.956681
303	0.936005	0.907257
304	0.95066	0.979436
305	0.929374	0.953404
306	0.914228	0.904764
307	0.893349	0.946545
308	0.890141	0.969971
309	0.859054	0.942675
310	0.942605	1.01968
311	0.913872	0.979739
312	0.986785	0.895298
313	0.899909	0.908428
314	0.874798	0.901576
315	0.798704	0.930233
316	0.887299	0.959811
317	0.926708	0.949947
318	0.912259	0.95161
319	0.926211	0.943652
320	0.870471	0.994008
321	0.899224	0.945825
322	0.976836	0.942208
323	0.946649	0.936736
324	0.899285	0.95406
325	0.91165	0.934867
326	0.887644	0.912582
327	0.955687	0.940436
328	0.911949	0.853477
329	0.881126	0.986322
330	0.909936	1.07144
331	0.860616	0.892364
332	0.931816	0.897606
333	0.873874	0.971397
334	0.847537	0.890454
335	0.902324	0.889801
336	0.930969	0.954778
337	0.875349	0.938084
338	0.852887	0.864801
339	0.912167	0.991392
340	0.85864	0.844512
341	0.881763	0.990674
342	0.838281	1.00263
343	0.875157	0.940392
344	0.903836	0.908345
345	0.890599	0.962854
346	0.818714	0.876303
347	0.894112	0.924675
348	0.847486	0.846062
349	0.864612	0.951138
350	0.935532	0.831781
351	0.795854	0.874138
352	0.867048	0.888454
353	0.901063	0.935752
354	0.874018	0.982775
355	0.880782	0.910626
356	0.832584	0.890347
357	0.852444	0.897666
358	0.843572	0.895246
359	0.90685	0.889862
360	0.832683	0.917715
361	0.885127	0.914636
362	0.873181	0.874755
363	0.847094	0.951668
364	0.875347	0.93441
365	0.89538	0.895259
366	0.84742	0.943725
367	0.815276	0.863966
368	0.886347	0.96048
369	0.89473	0.906836
370	0.911955	0.924237
371	0.84261	0.875133
372	0.815085	0.896071
373	0.784801	0.905257
374	0.84193	0.873776
375	0.750766	0.782988
376	0.854643	0.894241
377	0.895072	0.932496
378	0.807426	0.926645
379	0.880835	0.953082
380	0.845012	0.8691
381	0.856812	0.993727
382	0.826166	0.88381
383	0.805774	0.855676
384	0.879208	0.964662
385	0.928262	0.920678
386	0.853444	0.92819
387	0.82744	0.998147
388	0.840654	0.83542
389	0.80478	0.890161
390	0.875264	0.913778
391	0.889146	0.887108
392	0.801499	0.875347
393	0.990809	1.01799
394	0.926919	1.05232
395	0.886521	0.938423
396	0.856058	0.964951
397	0.79634	0.841024
398	0.838719	0.863583
399	0.786525	0.903352
400	0.877423	0.926235
401	0.80366	0.887576
402	0.797042	0.866474
403	0.799753	0.907038
404	0.811655	0.867525
405	0.832528	0.874487
406	0.834624	0.850444
407	0.814914	0.910826
408	0.814766	0.928147
409	0.789376	0.829601
410	0.811652	0.831376
411	0.824051	0.869649
412	0.859158	0.89974
413	0.871451	0.876169
414	0.867557	0.933256
415	0.797677	0.830051
416	0.807637	0.903978
417	0.801516	0.845304
418	0.841667	0.914297
419	0.874114	0.937767
420	0.837256	0.901404
421	0.900248	0.87358
422	0.763047	0.860736
423	0.846364	0.924719
424	0.839768	0.897457
425	0.857824	0.882783
426	0.795587	0.817611
427	0.76185	0.860586
428	0.826046	0.918806
429	0.822768	0.864008
430	0.827553	0.863283
431	0.82185	0.813688
432	0.821308	0.889044
433	0.796047	0.795945
434	0.8453	0.832461
435	0.803969	0.865031
436	0.840499	0.871529
437	0.796717	0.80867
438	0.851018	0.874718
439	0.818046	0.854687
440	0.807439	0.904129
441	0.807424	0.845044
442	0.828461	0.898683
443	0.772689	0.848787
444	0.810598	0.809704
445	0.804014	0.804928
446	0.816267	0.879945
447	0.803194	0.814132
448	0.800094	0.891396
449	0.829891	0.871386
450	0.827124	0.828739
451	0.758071	0.837856
452	0.747532	0.874445
453	0.779473	0.806163
454	0.775174	0.831583
455	0.767492	0.840776
456	0.799356	0.893422
457	0.800446	0.819714
458	0.766205	0.856747
459	0.787414	0.767572
460	0.799051	0.78622
461	0.765432	0.814374
462	0.775443	0.786652
463	0.850987	0.793059
464	0.759725	0.75362
465	0.804729	0.845103
466	0.785931	0.859805
467	0.741661	0.843849
468	0.726855	0.808466
469	0.726937	0.799194
470	0.696462	0.769422
471	0.76994	0.791226
472	0.765362	0.789993
473	0.763856	0.864437
474	0.744756	0.77914
475	0.785634	0.829404
476	0.772393	0.82162
477	0.802774	0.863181
478	0.747467	0.829774
479	0.760104	0.812088
480	0.735919	0.828848
481	0.719138	0.812368
482	0.771904	0.814148
483	0.797358	0.770015
484	0.725667	0.777882
485	0.770271	0.841662
486	0.750804	0.765565
487	0.768054	0.822092
488	0.733598	0.816119
489	0.836242	0.832997
490	0.882498	0.892217
491	0.69847	0.791003
492	0.677021	0.80284
493	0.723169	0.775169
494	0.731849	0.783302
495	0.69627	0.720004
496	0.906637	0.936508
497	0.500284	0.521995
498	0.538006	0.553596
499	0.64423	0.657118
500	2.2013	1.91853
501	0.0632588	0.061331
