# Supplementary material
Source: HighWire-hosted journal article supplement (doi:10.1101/rna.080884.125)
Supplement: Supplemental_File_2_BioID.xlsx [file Supplemental_File_2_BioID.xlsx]

## Sheet: All proteins
Checked	Protein FDR Confidence: Combined	Master	Accession	Gene Symbol	Gene ID	Description	Sum PEP Score	# Decoy Protein: Combined	Coverage [%]	# Peptides	# PSMs	# Protein Unique Peptides	# Unique Peptides	MW [kDa]	Score Sequest HT: Sequest HT	Coverage [%] (by Search Engine): Sequest HT	# PSMs (by Search Engine): Sequest HT	# Peptides (by Search Engine): Sequest HT	# Protein Annotation Groups	# Razor Peptides	Abundance Ratio: (DEF1_380-TID) / (Free_TID)	Abundance Ratio: (DEF1_500-TID) / (Free_TID)	Abundance Ratio: (DEF1_530TID) / (Free_TID)	Abundance Ratio: (DEF1_FL-TID) / (Free_TID)	Abundance Ratio (log2): (DEF1_380-TID) / (Free_TID)	Abundance Ratio (log2): (DEF1_500-TID) / (Free_TID)	Abundance Ratio (log2): (DEF1_530TID) / (Free_TID)	Abundance Ratio (log2): (DEF1_FL-TID) / (Free_TID)	Abundance Ratio P-Value: (DEF1_380-TID) / (Free_TID)	Abundance Ratio P-Value: (DEF1_500-TID) / (Free_TID)	Abundance Ratio P-Value: (DEF1_530TID) / (Free_TID)	Abundance Ratio P-Value: (DEF1_FL-TID) / (Free_TID)	Abundance Ratio Adj. P-Value: (DEF1_380-TID) / (Free_TID)	Abundance Ratio Adj. P-Value: (DEF1_500-TID) / (Free_TID)	Abundance Ratio Adj. P-Value: (DEF1_530TID) / (Free_TID)	Abundance Ratio Adj. P-Value: (DEF1_FL-TID) / (Free_TID)	Abundances (Grouped): DEF1_380-TID	Abundances (Grouped): DEF1_500-TID	Abundances (Grouped): DEF1_530TID	Abundances (Grouped): DEF1_FL-TID	Abundances (Grouped): Free_TID	Abundances (Grouped) CV [%]: DEF1_380-TID	Abundances (Grouped) CV [%]: DEF1_500-TID	Abundances (Grouped) CV [%]: DEF1_530TID	Abundances (Grouped) CV [%]: DEF1_FL-TID	Abundances (Grouped) CV [%]: Free_TID	Abundances (Scaled): F1: 131C, Sample, DEF1_380-TID	Abundances (Scaled): F1: 132N, Sample, DEF1_380-TID	Abundances (Scaled): F1: 130C, Sample, DEF1_500-TID
FALSE	High	IsMasterProtein	P38153	APM3	D6VQT3; P38153; sce:YBR288C	AP-3 complex subunit mu [OS=Saccharomyces cerevisiae S288C]	56.401	0	26	13	15	13	13	54.8	39.22	26	15	13	54	0	3.822	1.623	4.425	1.607	1.93	0.7	2.15	0.68	0.0046674	0.35909	0.00253364	0.134185	0.0662079	1	0.0657702	0.477184	165.7	70.4	191.9	69.7	43.4	14.09	6.17	5.2	42.59	5.62	180.9	148.1	72.6
FALSE	High	IsMasterProtein	Q06336	GGA1	D6VSY7; Q06336; sce:YDR358W	ADP-ribosylation factor-binding protein GGA1 [OS=Saccharomyces cerevisiae S288C]	29.988	0	17	9	10	8	8	62.3	28.44	17	10	9	80	1	2.404	1.075	1.841	1.016	1.27	0.1	0.88	0.02	0.0581877	0.999489	0.227234	0.877849	0.277418	1	0.692552	1	172.5	77.1	132.1	72.9	71.8	9.61	1.12	1.39	37.2	8.51	194.2	169.5	81.8
FALSE	High	IsMasterProtein	P06634	DED1	D6W2R0; P06634; sce:YOR204W	ATP-dependent RNA helicase DED1 [OS=Saccharomyces cerevisiae S288C]	238.146	0	58	28	52	23	27	65.5	174.82	58	52	28	137	1	2.584	0.974	2.214	2.007	1.37	-0.04	1.15	1.01	0.00763794	0.999982	0.0198483	0.0101238	0.0874374	1	0.188477	0.107375	156.2	58.9	133.9	121.4	60.5	5.57	7	0.24	33.48	2.75	140.9	152.5	58
FALSE	High	IsMasterProtein	P04076	ARG4	D3DKW3; P04076; sce:YHR018C	Argininosuccinate lyase [OS=Saccharomyces cerevisiae S288C]	6.167	0	4	1	2	1	1	52	9.04	4	2	1	42	0	1.19	1.284	1.418	1.398	0.25	0.36	0.5	0.48	0.958996	0.851408	0.632542	0.666871	1	1	1	1	94.8	102.3	113	111.3	79.7	22.25	9.01	1.1	4.45	46.19	86.8	119.2	116.9
FALSE	High	IsMasterProtein	Q08491	SKI7	D6W2D9; O00032; Q08491; sce:YOR076C	Superkiller protein 7 [OS=Saccharomyces cerevisiae S288C]	17.535	0	8	4	5	4	4	84.7	13.69	8	5	4	116	0	2.111	1.089	1.456	1.053	1.08	0.12	0.54	0.07	0.383777	0.999841	0.885663	0.807005	0.831971	1	1	1	160.4	82.7	110.6	80	76	4.95	8.51	13.25	67.36	31.23	150.3	140.1	79.5
FALSE	High	IsMasterProtein	P53836	CAF120	D6W0R6; P53836; sce:YNL278W	CCR4-NOT transcriptional complex subunit CAF120 [OS=Saccharomyces cerevisiae S288C]	20.565	0	6	6	6	6	6	118.2	11.02	6	6	6	45	0	0.631	0.334	0.639	1.944	-0.66	-1.58	-0.65	0.96	0.577055	0.0378	0.598854	0.183552	1	0.276397	1	0.587469	71.5	37.8	72.4	220.3	113.3	39.34	5.45	16.28	20.88	18.59	84.9	48	32.5
FALSE	High	IsMasterProtein	P32499	NUP2	D6VYX5; P32499; Q06130; sce:YLR335W	Nucleoporin NUP2 [OS=Saccharomyces cerevisiae S288C]	66.732	0	25	18	22	18	18	77.8	47.97	25	22	18	122	0	0.528	0.634	0.578	0.49	-0.92	-0.66	-0.79	-1.03	0.0025031	0.0166769	0.00614922	0.000571702	0.052292	0.185676	0.11215	0.0177537	86.1	103.3	94.3	79.9	163	15.58	2	1.42	4.95	5.58	97.9	78.5	106.7
FALSE	High	IsMasterProtein	P16387	PDA1	D3DM87; P16387; sce:YER178W	Pyruvate dehydrogenase E1 component subunit alpha, mitochondrial [OS=Saccharomyces cerevisiae S288C]	2.067	10	2	1	1	1	1	46.3	2.49	2	1	1	123	0	1.306	2.728	1.35	1.429	0.39	1.45	0.43	0.51	0.959262	0.151549	0.936368	0.882395	1	0.630355	1	1	90.3	188.7	93.3	98.8	69.1	45.41	0.61	16.81	32.46	28.09	133.5	68.6	200.7
FALSE	High	IsMasterProtein	Q04067	TIF35	D6VT58; Q04067; sce:YDR429C	Eukaryotic translation initiation factor 3 subunit G [OS=Saccharomyces cerevisiae S288C]	14.008	0	13	3	5	3	3	30.5	16.45	13	5	3	86	0	0.815	0.672	0.649	2.945	-0.29	-0.57	-0.62	1.56	0.997298	0.951292	0.932804	0.698932	1	1	1	1	64	52.8	51	231.3	78.5	0.41	14.61	11.22	61.36	6.93	65	64.7	59.3
FALSE	High	IsMasterProtein	P43621	RET2	D6VTT4; P43621; sce:YFR051C	Coatomer subunit delta [OS=Saccharomyces cerevisiae S288C]	40.396	0	18	8	10	8	8	60.6	30.4	18	10	8	53	0	4.274	0.949	2.954	1.282	2.1	-0.08	1.56	0.36	0.000174662	0.998749	0.00113681	0.367052	0.0125429	1	0.0455965	0.855463	226	50.2	156.2	67.8	52.9	16.11	0.11	8.54	7.35	26.02	257.2	204.6	50.9
FALSE	High	IsMasterProtein	P53076	VID30	D6VVA7; P53076; sce:YGL227W	Vacuolar import and degradation protein 30 [OS=Saccharomyces cerevisiae S288C]	2.299	5	1	1	1	1	1	108.1	2.7	1	1	1	63	0
FALSE	High	IsMasterProtein	Q12305	RDL1	D6W2Y3; Q12305; sce:YOR285W	Thiosulfate:glutathione sulfurtransferase [OS=Saccharomyces cerevisiae S288C]	11.572	0	19	2	2	2	2	15.4	9.08	19	2	2	7	0	2.057	1.095	2.964	1.902	1.04	0.13	1.57	0.93	0.0245957	0.988193	0.00317548	0.0410581	0.169872	1	0.0723333	0.218406	120.8	64.3	174.2	111.8	58.8	4.76	8.8	11.7	27.65	16.71	134.6	125.8	73.7
FALSE	High	IsMasterProtein	P53929		D6W172; P53929; sce:YNL108C	Uncharacterized protein YNL108C [OS=Saccharomyces cerevisiae S288C]	6.976	0	9	2	3	2	2	30.7	10.18	9	3	2	14	0	1.194	0.698	1.008	0.817	0.26	-0.52	0.01	-0.29	0.758298	0.185695	1	0.537414	1	0.708233	1	1	125	73	105.5	85.5	104.7	26.54	2.96	14.99	5.47	8.23	104.2	152.3	72.1
FALSE	High	IsMasterProtein	Q01389	BCK1	D6VW89; P32894; Q01389; sce:YJL095W	Serine/threonine-protein kinase BCK1/SLK1/SSP31 [OS=Saccharomyces cerevisiae S288C]	7.915	0	2	3	3	3	3	164.1	2.26	2	3	3	87	0	1.031	0.567	0.969	0.634	0.04	-0.82	-0.05	-0.66	0.999995	0.376886	0.999994	0.566754	1	1	1	1	130.3	71.6	122.4	80.1	126.3	30.49	22.98	21.16	23.43	35.72	172.4	111.2	64.6
FALSE	High	IsMasterProtein	P42941	SER2	D6VUZ1; P42941; sce:YGR208W	Phosphoserine phosphatase [OS=Saccharomyces cerevisiae S288C]	61.018	0	35	10	13	10	10	34.2	41.75	35	13	10	43	0	1.731	0.477	1.412	0.856	0.79	-1.07	0.5	-0.22	0.00918392	0.00159877	0.0874425	0.744426	0.0959302	0.0805374	0.385928	1	158.4	43.7	129.2	78.3	91.5	1.05	1.6	3.21	14.4	13.99	158.7	161	44.6
FALSE	High	IsMasterProtein	P40339	RFC4	D6W1X4; P40339; sce:YOL094C	Replication factor C subunit 4 [OS=Saccharomyces cerevisiae S288C]	2.273	5	4	2	2	0	1	36.1	0	4	2	2	114	0
FALSE	High	IsMasterProtein	P39954	SAH1	D3DLU3; P39954; sce:YER043C	Adenosylhomocysteinase [OS=Saccharomyces cerevisiae S288C]	11.512	0	7	3	3	3	3	49.1	8.28	7	3	3	93	0	1.758	1.816	1.812	1.524	0.81	0.86	0.86	0.61	0.346036	0.29999	0.302424	0.199382	0.769044	0.948729	0.839128	0.609906	112	115.7	115.5	97.1	63.7	3.66	6.5	6.46	48.74	11.45	107.3	101.9	103.1
FALSE	High	IsMasterProtein	P21147	OLE1	D6VU86; E9P911; P21147; sce:YGL055W	Acyl-CoA desaturase 1 [OS=Saccharomyces cerevisiae S288C]	9.363	0	7	2	2	2	2	58.4	5.91	7	2	2	83	0	0.227	0.424	0.275	0.295	-2.14	-1.24	-1.86	-1.76	0.00350023	0.0489417	0.00722611	0.00954656	0.0552424	0.31743	0.116542	0.107375	49.8	93.1	60.4	64.8	219.9	14.24	11.11	18.1	18.2	23.84	48.1	58.9	107.7
FALSE	High	IsMasterProtein	P10080	SBP1	D3DKT4; P10080; sce:YHL034C	Single-stranded nucleic acid-binding protein [OS=Saccharomyces cerevisiae S288C]	6.737	0	8	1	1	1	1	33	5.32	8	1	1	73	0	0.884	0.705	1.025	1.134	-0.18	-0.5	0.04	0.18	0.997626	0.829492	0.999999	0.997251	1	1	1	1	86.5	68.9	100.2	110.8	97.8	2.37	15.71	5.51	45.28	31.3	82.5	85.3	59.8
FALSE	High	IsMasterProtein	Q07800	PSR1	D6VXZ2; Q07800; sce:YLL010C	Phosphatase PSR1 [OS=Saccharomyces cerevisiae S288C]	3.255	3	3	1	1	1	1	47.9	2.48	3	1	1	103	0	0.664	0.802	0.771	0.877	-0.59	-0.32	-0.38	-0.19	0.704389	0.96272	0.929547	0.999987	1	1	1	1	75.3	91	87.4	99.6	113.5	11.55	11.15	17.79	43.21	38.67	66.3	78.1	94.1
FALSE	High	IsMasterProtein	P10591	SSA1	D6VPL2; P10591; sce:YAL005C	Heat shock protein SSA1 [OS=Saccharomyces cerevisiae S288C]	211.145	0	61	31	49	5	5	69.6	170.29	61	49	31	216	22	1.428	1.404	1.6	1.239	0.51	0.49	0.68	0.31	0.945224	0.954844	0.853996	0.686112	1	1	1	1	107	105.1	119.8	92.8	74.9	10.75	15.28	6.11	81.87	5.3	85.9	100	81.7
FALSE	High	IsMasterProtein	P53863	JJJ1	D6W0W4; P53863; sce:YNL227C	J protein JJJ1 [OS=Saccharomyces cerevisiae S288C]	4.333	1	2	1	2	1	1	68.7	4.01	2	2	1	70	0
FALSE	Medium	IsMasterProtein	Q03153	ATP25	D6VZS1; Q03153; sce:YMR098C	ATPase synthesis protein 25, mitochondrial [OS=Saccharomyces cerevisiae S288C]	1.352	52	2	1	1	1	1	70.4	0	2	1	1	75	0
FALSE	High	IsMasterProtein	Q12386	ARP8	D6W2J7; Q12386; sce:YOR141C	Actin-like protein ARP8 [OS=Saccharomyces cerevisiae S288C]	4.852	1	2	1	1	1	1	100.1	4.65	2	1	1	93	0	0.62	0.703	0.757	0.532	-0.69	-0.51	-0.4	-0.91	0.0983179	0.261756	0.453297	0.0311048	0.363239	0.87608	1	0.178697	83.7	94.8	102.2	71.8	134.9	6.65	14.21	0.63	25.73	16.9	86.1	94.6	113.1
FALSE	High	IsMasterProtein	P40150	SSB2	D6W0Y1; P40150; sce:YNL209W	Ribosome-associated molecular chaperone SSB2 [OS=Saccharomyces cerevisiae S288C]	347.875	0	65	39	93	2	2	66.6	384.46	65	93	39	125	0	0.747	0.535	0.679	1.463	-0.42	-0.9	-0.56	0.55	0.868563	0.285522	0.696889	0.930562	1	0.92332	1	1	84.5	60.5	76.7	165.4	113.1	18.91	13.45	2.76	38.11	22.92	72.6	95	65.4
FALSE	High	IsMasterProtein	Q12118	SGT2	D6W273; Q12118; sce:YOR007C	Small glutamine-rich tetratricopeptide repeat-containing protein 2 [OS=Saccharomyces cerevisiae S288C]	64.852	0	56	12	13	12	12	37.2	47.7	56	13	12	80	0	1.376	0.523	1.093	0.65	0.46	-0.93	0.13	-0.62	0.453211	0.0423783	0.992136	0.517263	0.90392	0.291319	1	1	151.8	57.7	120.6	71.7	110.3	3.54	2.68	2.76	32.65	2.84	146.1	153.6	58
FALSE	High	None	P34221	PTC3	D6VPU4; P34221; Q92330; sce:YBL056W	Protein phosphatase 2C homolog 3 [OS=Saccharomyces cerevisiae S288C]	8.535	0	4	2	2	0	2	51.3	5.5	4	2	2	63	0	1.673	0.374	1.688	0.927	0.74	-1.42	0.76	-0.11	0.0559651	0.00244553	0.0521056	0.989536	0.275061	0.082482	0.305456	1	159.3	35.6	160.7	88.2	95.2	1.6	21.72	18.74	4.64	10.49	170	173.9	32.9
FALSE	High	IsMasterProtein	P12612	TCP1	D6VSJ6; P12612; sce:YDR212W	T-complex protein 1 subunit alpha [OS=Saccharomyces cerevisiae S288C]	14.594	0	10	3	3	3	3	60.4	9.98	10	3	3	46	0	0.493	0.551	0.502	0.613	-1.02	-0.86	-0.99	-0.71	0.178716	0.298583	0.194861	0.604008	0.514649	0.946887	0.62892	1	71.6	80	73	89.1	145.3	19.18	7.97	10.64	44.72	6.89	60.5	79.5	82
FALSE	High	IsMasterProtein	P02406	RPL28	D6VU43; P02406; sce:YGL103W	60S ribosomal protein L28 [OS=Saccharomyces cerevisiae S288C]	7.27	0	23	3	4	3	3	16.7	7.83	23	4	3	54	0	0.599	1.647	1.02	1.058	-0.74	0.72	0.03	0.08	0.985381	0.986989	1	0.965992	1	1	1	1	52.1	143.3	88.7	92	87	12.36	3.27	5.88	83.41	19.65	57.8	48.5	149.1
FALSE	High	None	Q99337	TY1B-NL2	Q99337; S6G3B3; sce:YNL054W-B	Transposon Ty1-NL2 Gag-Pol polyprotein [OS=Saccharomyces cerevisiae S288C]	79.781	0	12	16	21	0	2	198.1	66.2	12	21	16	97	0	0.823	0.794	0.464	3.415	-0.28	-0.33	-1.11	1.77	0.999906	0.999786	0.949347	0.999119	1	1	1	1	61	58.8	34.4	253.1	74.1	15.42	4.46	39.15	79.75	7.12	71.9	57.8	60.3
FALSE	High	IsMasterProtein	P39939	RPS26B	A2TBN5; D3DM37; P39939; Q6B2E8; sce:YER131W	40S ribosomal protein S26-B [OS=Saccharomyces cerevisiae S288C]	17.657	0	27	3	4	1	1	13.4	12.58	27	4	3	83	0	0.414	0.672	0.362	0.618	-1.27	-0.57	-1.46	-0.69	0.0805361	0.626815	0.0451159	0.46427	0.340206	1	0.276497	0.996671	64.9	105.2	56.7	96.8	156.6	34.47	20.52	40.57	13.66	1.78	89.2	54.2	130.5
FALSE	High	IsMasterProtein	P30605	ITR1	D6VTB9; P30605; sce:YDR497C	Myo-inositol transporter 1 [OS=Saccharomyces cerevisiae S288C]	5.715	0	3	2	2	2	2	63.5	3.98	3	2	2	52	0
FALSE	High	IsMasterProtein	P38075	PDX3	D6VQ35; P38075; sce:YBR035C	Pyridoxamine 5'-phosphate oxidase [OS=Saccharomyces cerevisiae S288C]	43.884	0	46	10	12	10	10	26.9	39.26	46	12	10	79	0	2.287	0.862	2.388	1.3	1.19	-0.21	1.26	0.38	0.406788	0.998734	0.362007	0.806596	0.856085	1	0.956199	1	157.8	59.5	164.9	89.7	69	1.71	5.5	1.33	77.74	12.39	146.3	142.8	52.4
FALSE	High	IsMasterProtein	P36076	CAB3	D6VXK0; P36076; sce:YKL088W	Coenzyme A biosynthesis protein 3 [OS=Saccharomyces cerevisiae S288C]	40.196	0	23	11	13	11	11	65.2	29.85	23	13	11	76	0	1.021	0.923	0.858	0.831	0.03	-0.11	-0.22	-0.27	1	0.999999	0.99998	0.977636	1	1	1	1	108.7	98.4	91.4	88.5	106.5	1.51	29.86	0.89	151.11	9.69	52.3	51.2	58.1
FALSE	High	IsMasterProtein	P53184	PNC1	D6VUA2; P53184; sce:YGL037C	Nicotinamidase [OS=Saccharomyces cerevisiae S288C]	8.014	0	15	2	2	2	2	25	6.16	15	2	2	117	0	0.725	0.315	0.517	0.48	-0.46	-1.67	-0.95	-1.06	0.759965	0.0218066	0.196037	0.139385	1	0.20522	0.62918	0.486789	108.3	47	77.2	71.8	149.5	5.95	3.37	0.47	10.74	22.54	110.2	119.9	51.1
FALSE	High	IsMasterProtein	P31384	CCR4	D6VPJ7; P31384; sce:YAL021C	CCR4-Not complex 3'-5'-exoribonuclease subunit Ccr4 [OS=Saccharomyces cerevisiae S288C]	196.863	0	32	27	49	27	27	94.6	162.05	32	49	27	218	0	1.702	0.967	2.803	7.623	0.77	-0.05	1.49	2.93	0.919752	1	0.497067	0.165278	1	1	1	0.547276	62.4	35.4	102.7	279.4	36.6	2.55	1.39	13.22	66.62	5.21	66.1	63.8	36.5
FALSE	High	IsMasterProtein	P38934	BFR1	D6W2Q7; P38934; sce:YOR198C	Nuclear segregation protein BFR1 [OS=Saccharomyces cerevisiae S288C]	107.872	0	43	23	30	23	23	54.6	94.05	43	30	23	87	0	4.384	0.879	2.741	1.306	2.13	-0.19	1.45	0.39	3.3078e-05	0.852255	0.000404459	0.26245	0.00542951	1	0.0331945	0.716283	227.2	45.6	142.1	67.7	51.8	3.89	1.79	7.9	11.1	23.31	226.7	239.6	47.3
FALSE	High	IsMasterProtein	P0CX38	RPS6B	D6VQH5; P02365; P05751; P0CX38; Q02894; sce:YBR181C; sce:YPL090C	40S ribosomal protein S6-B [OS=Saccharomyces cerevisiae S288C]	66.497	0	49	12	75	12	12	27	229.29	49	75	12	74	0	0.405	1.315	0.592	1.145	-1.3	0.39	-0.76	0.2	0.115934	0.923823	0.521101	0.99911	0.394197	1	1	1	45	146.2	65.9	127.3	111.2	0.12	34.85	10.28	40.13	3.7	45.7	45.7	190.7
FALSE	High	IsMasterProtein	Q05022	RRP5	D6W054; Q05022; sce:YMR229C	rRNA biogenesis protein RRP5 [OS=Saccharomyces cerevisiae S288C]	35.14	0	7	10	10	10	10	193	26.42	7	10	10	96	0	0.643	1.174	0.97	0.574	-0.64	0.23	-0.04	-0.8	0.0835468	0.814884	0.999857	0.0283499	0.346554	1	1	0.167907	77.5	141.5	116.9	69.2	120.5	2.39	8.27	27.94	8.09	3.27	77.1	79.7	151.8
FALSE	High	IsMasterProtein	P38708		D3DKW5; P38708; sce:YHR020W	Putative proline--tRNA ligase YHR020W [OS=Saccharomyces cerevisiae S288C]	69.781	0	24	13	22	13	13	77.3	69.99	24	22	13	86	0	0.986	0.901	1.044	0.916	-0.02	-0.15	0.06	-0.13	1	0.999229	0.99999	0.725887	1	1	1	1	100.8	92	106.7	93.6	102.2	2.93	9.51	2.38	46.76	7.85	107.9	103.6	103.3
FALSE	High	IsMasterProtein	P11154	PYC1	D6VU79; P11154; sce:YGL062W	Pyruvate carboxylase 1 [OS=Saccharomyces cerevisiae S288C]	820.154	0	64	80	665	35	35	130	1842.85	64	665	80	57	0	0.465	1.634	0.79	0.483	-1.11	0.71	-0.34	-1.05	0.0119422	0.0984069	0.64878	0.0231695	0.108052	0.483728	1	0.152842	49.2	173.1	83.7	51.2	106	20.74	12.52	4.69	21.03	0.5	43.3	58.2	161.5
FALSE	High	IsMasterProtein	P10622	RPP1B	D6VRM0; P10622; sce:YDL130W	60S acidic ribosomal protein P1-beta [OS=Saccharomyces cerevisiae S288C]	4.005	3	15	1	1	1	1	10.7	2.23	15	1	1	94	0
FALSE	High	IsMasterProtein	P16451	PDX1	D6VUX5; E9P906; P16451; sce:YGR193C	Pyruvate dehydrogenase complex protein X component, mitochondrial [OS=Saccharomyces cerevisiae S288C]	14.792	0	10	2	2	2	2	45.3	10.43	10	2	2	99	0	0.657	0.818	0.609	0.983	-0.61	-0.29	-0.72	-0.02	0.930725	0.997035	0.874363	0.999995	1	1	1	1	76.3	94.9	70.6	114.1	116.1	25.08	9.95	2.27	74.83	27.32	57.9	82.8	92.5
FALSE	High	IsMasterProtein	P32617	IES6	D3DLK5; P32617; Q6Q5Q5; sce:YEL044W	Chromatin-remodeling complex subunit IES6 [OS=Saccharomyces cerevisiae S288C]	6.367	0	13	3	3	3	3	18.5	6.6	13	3	3	68	0	3.622	1.508	1.83	1.484	1.86	0.59	0.87	0.57	0.709544	0.996344	0.979563	0.676467	1	1	1	1	202.4	84.3	102.3	82.9	55.9	16.15	1.56	14.4	146.16	19.37	119.6	95.1	43.9
FALSE	High	IsMasterProtein	P05743	RPL26A	D6VYY3; P05743; sce:YLR344W	60S ribosomal protein L26-A [OS=Saccharomyces cerevisiae S288C]	8.049	0	27	4	4	0	4	14.2	3.79	27	4	4	57	0	0.584	2.204	0.739	1.148	-0.77	1.14	-0.44	0.2	0.89055	0.660019	0.988844	0.964959	1	1	1	1	52.1	196.6	65.9	102.4	89.2	18.03	30.38	2.16	92.47	5.64	50.7	39.2	209.1
FALSE	High	IsMasterProtein	P27466	CMK1	D6VTP5; P27466; sce:YFR014C	Calcium/calmodulin-dependent protein kinase I [OS=Saccharomyces cerevisiae S288C]	7.243	0	5	2	2	1	1	50.3	6.51	5	2	2	65	0
FALSE	Medium	IsMasterProtein	P38013	AHP1	D6VYA9; P38013; sce:YLR109W	Peroxiredoxin AHP1 [OS=Saccharomyces cerevisiae S288C]	1.299	57	9	1	1	1	1	19.1	0	9	1	1	46	0
FALSE	High	IsMasterProtein	Q12034	SLF1	D6VTD6; E9P8Z6; Q12034; sce:YDR515W	Protein SLF1 [OS=Saccharomyces cerevisiae S288C]	25.774	0	12	5	9	4	5	50.9	23.27	12	9	5	71	0	1.911	0.927	2.089	2.742	0.93	-0.11	1.06	1.46	0.105831	0.998588	0.0619911	0.00619276	0.378815	1	0.332852	0.0829701	120.7	58.5	132	173.3	63.2	8.35	22.44	8.14	34.12	5.25	117	104	62.8
FALSE	High	None	P32492	MYO4	D6VPI9; P32492; sce:YAL029C	Myosin-4 [OS=Saccharomyces cerevisiae S288C]	4.899	1	1	1	1	0	1	169.2	3.26	1	1	1	103	0	0.7	1.129	0.87	0.93	-0.51	0.18	-0.2	-0.1	0.570878	0.988686	0.979423	0.998979	1	1	1	1	72	116.2	89.5	95.8	102.9	7.56	18.61	1.05	22.61	39.78	81.4	73.1	142.1
FALSE	High	IsMasterProtein	P38328	ARC40	D6VQN0; P38328; sce:YBR234C	Actin-related protein 2/3 complex subunit 1 [OS=Saccharomyces cerevisiae S288C]	50.958	0	32	10	12	10	10	42.4	36.83	32	12	10	72	0	2.206	0.67	1.896	0.856	1.14	-0.58	0.92	-0.23	0.00773468	0.174663	0.0240602	0.466155	0.0874374	0.679705	0.214304	0.996671	180.2	54.7	154.8	69.9	81.7	17	15.13	11.74	17.07	12.18	210.2	165.1	62.9
FALSE	High	IsMasterProtein	P23287	CNA1	D6VZ68; P23287; sce:YLR433C	Serine/threonine-protein phosphatase 2B catalytic subunit A1 [OS=Saccharomyces cerevisiae S288C]	3.51	3	2	1	1	1	1	63	3.03	2	1	1	101	0	0.953	0.777	1.012	1.001	-0.07	-0.36	0.02	0	1	0.999756	1	0.94836	1	1	1	1	96	78.2	102	100.8	100.7	4.65	0.21	17.77	150.52	17.54	45.6	42.7	36
FALSE	High	IsMasterProtein	P06168	ILV5	D6VYZ3; P06168; sce:YLR355C	Ketol-acid reductoisomerase, mitochondrial [OS=Saccharomyces cerevisiae S288C]	101.173	0	46	17	26	17	17	44.3	81.95	46	26	17	68	0	0.8	0.567	0.572	0.693	-0.32	-0.82	-0.81	-0.53	0.916825	0.25822	0.271284	0.716659	1	0.871872	0.791129	1	85.9	60.8	61.4	74.4	107.4	20.01	13.08	13.38	25.91	12.84	73.6	97.9	54.8
FALSE	High	None	P0C2I8	TY1A-LR4	D6VYQ3; P0C2I8; sce:YLR256W-A	Transposon Ty1-LR4 Gag polyprotein [OS=Saccharomyces cerevisiae S288C]	69.098	0	38	13	18	0	3	49	56.12	38	18	13	21	0	1.487	1.163	1.427	3.794	0.57	0.22	0.51	1.92	0.118019	0.835584	0.175461	7.20385e-05	0.394197	1	0.591669	0.00752475	86.1	67.3	82.6	219.6	57.9	10.46	6.39	2.92	15.73	14.99	83.4	71.9	63.4
FALSE	High	IsMasterProtein	Q05515	SVF1	D6VSX6; Q05515; sce:YDR346C	Survival factor 1 [OS=Saccharomyces cerevisiae S288C]	4.481	1	3	1	1	1	1	54.3	3.98	3	1	1	13	0	0.427	0.488	0.526	0.47	-1.23	-1.03	-0.93	-1.09	0.214804	0.344728	0.44146	0.398237	0.58073	1	1	0.898967	68.6	78.4	84.5	75.5	160.6	18.34	3.24	28.95	57.06	15.6	58.2	75.6	74
FALSE	High	IsMasterProtein	P38749	YAP3	D3DKQ4; P38749; sce:YHL009C	AP-1-like transcription factor YAP3 [OS=Saccharomyces cerevisiae S288C]	45.363	0	31	9	14	9	9	37.9	40.34	31	14	9	99	0	0.91	0.536	0.931	0.966	-0.14	-0.9	-0.1	-0.05	0.999993	0.951621	0.999998	0.889104	1	1	1	1	107.1	63.1	109.5	113.6	117.6	8.63	1.76	7.47	133.78	2.42	61.9	54.8	34.7
FALSE	High	IsMasterProtein	P32468	CDC12	D3DL57; P32468; sce:YHR107C	Cell division control protein 12 [OS=Saccharomyces cerevisiae S288C]	8.957	0	6	2	2	2	2	46.6	5.28	6	2	2	156	0	0.647	1.033	0.744	0.88	-0.63	0.05	-0.43	-0.18	0.979403	1	0.996294	0.994329	1	1	1	1	74.1	118.2	85.2	100.8	114.5	21.31	37.92	1.31	114.29	16.03	64.4	47.6	116.2
FALSE	High	IsMasterProtein	P47129	ACF4	D6VWQ2; P47129; sce:YJR083C	Assembly-complementing factor 4 [OS=Saccharomyces cerevisiae S288C]	10.25	0	10	3	3	3	3	35.5	8.23	10	3	3	0	0	1.639	0.839	1.202	1.033	0.71	-0.25	0.27	0.05	0.708796	0.993938	0.992516	0.963802	1	1	1	1	146.2	74.8	107.3	92.2	89.2	17.77	1.72	8.52	49.83	8.68	172	133.6	78.5
FALSE	High	IsMasterProtein	P53741	BRE5	D6W1M6; P53741; sce:YNR051C	UBP3-associated protein BRE5 [OS=Saccharomyces cerevisiae S288C]	49.232	0	24	9	11	9	9	57.6	32.46	24	11	9	101	0	0.887	0.702	0.786	1.793	-0.17	-0.51	-0.35	0.84	0.987666	0.529778	0.82028	0.136326	1	1	1	0.481964	81.5	64.5	72.2	164.7	91.9	11.51	5.46	19.19	28.01	2.25	71.7	84.4	59.2
FALSE	Medium	IsMasterProtein	Q08581	SLK19	D6W2Q4; Q08581; sce:YOR195W	Kinetochore protein SLK19 [OS=Saccharomyces cerevisiae S288C]	1.674	33	2	1	1	1	1	95.3	0	2	1	1	77	0
FALSE	High	IsMasterProtein	P41697	BUD6	D6VYW2; P41697; sce:YLR319C	Bud site selection protein 6 [OS=Saccharomyces cerevisiae S288C]	15.445	0	9	7	7	7	7	88.8	15.96	9	7	7	132	0	1.189	0.543	0.949	1.179	0.25	-0.88	-0.07	0.24	0.869998	0.0465483	0.999246	0.7572	1	0.305357	1	1	117.9	53.8	94.1	116.8	99.1	0.95	7.37	4.03	27.23	12.96	113.8	115.3	49.6
FALSE	High	IsMasterProtein	P46784	RPS10B	D6W055; P46784; sce:YMR230W	40S ribosomal protein S10-B [OS=Saccharomyces cerevisiae S288C]	17.259	0	57	5	5	0	5	12.7	17.06	57	5	5	127	0	0.379	1.149	0.484	1.037	-1.4	0.2	-1.05	0.05	0.417688	0.999592	0.671644	0.998563	0.857007	1	1	1	46.4	140.6	59.2	126.9	122.3	7.6	24.84	5.75	85.22	17.26	42.2	37.9	144.6
FALSE	High	IsMasterProtein	Q12163	NBP2	D6VSE2; Q12163; sce:YDR162C	NAP1-binding protein 2 [OS=Saccharomyces cerevisiae S288C]	16.368	0	25	3	3	3	3	26.6	11.48	25	3	3	26	0	0.885	0.551	0.905	0.695	-0.18	-0.86	-0.14	-0.52	0.934257	0.0245611	0.969767	0.301352	1	0.221763	1	0.769429	108.4	67.6	110.8	85.2	122.5	12.56	9.35	1.63	21.53	12.41	98.3	117.4	62.7
FALSE	High	IsMasterProtein	P25382	RSA4	D6VR74; P25382; Q8NKJ4; sce:YCR072C	Ribosome assembly protein 4 [OS=Saccharomyces cerevisiae S288C]	2.596	5	1	1	1	1	1	57	1.8	1	1	1	37	0
FALSE	High	IsMasterProtein	P12611	WHI2	D6W2A9; P12611; Q08413; sce:YOR043W	Growth regulation protein [OS=Saccharomyces cerevisiae S288C]	4.685	1	3	1	1	1	1	55.3	3.51	3	1	1	136	0	0.207	0.09	0.218	0.397	-2.27	-3.47	-2.2	-1.33	0.000932142	8.54623e-05	0.00113134	0.0152738	0.0315009	0.0253671	0.0455965	0.119264	50.1	21.9	52.9	96.3	242.4	9.29	4.94	14.92	23.37	23.98	57.4	50.3	22.7
FALSE	Medium	IsMasterProtein	P47176	BAT2	D6VWW6; P47176; Q07124; sce:YJR148W	Branched-chain-amino-acid aminotransferase, cytosolic [OS=Saccharomyces cerevisiae S288C]	1.953	16	5	1	1	1	1	41.6	2.85	5	1	1	73	0	0.31	0.324	0.292	0.452	-1.69	-1.63	-1.78	-1.15	0.0785938	0.0907281	0.0642605	0.281089	0.338218	0.454829	0.340255	0.744174	50.8	53	47.8	74	163.7	34.79	8.78	22.22	40.12	38	41.5	68.5	59.2
FALSE	High	IsMasterProtein	P32567	PAH1	D6VZY7; P32567; sce:YMR165C	Phosphatidic acid phosphohydrolase 1 [OS=Saccharomyces cerevisiae S288C]	50.269	0	17	13	17	13	13	95	40.83	17	17	13	101	0	1.781	0.647	1.115	0.618	0.83	-0.63	0.16	-0.69	0.489392	0.725092	0.998952	0.198476	0.932523	1	1	0.609757	177.3	64.4	111	61.5	99.5	7.73	5.65	11.19	45.97	5.37	197.4	177	65.2
FALSE	High	IsMasterProtein	P38810	SFB3	D3DL48; P38810; sce:YHR098C	SED5-binding protein 3 [OS=Saccharomyces cerevisiae S288C]	189.073	0	43	32	47	32	32	103.9	152.29	43	47	32	82	0	2.79	0.587	2.905	1.709	1.48	-0.77	1.54	0.77	2.74113e-05	0.00186537	2.12421e-05	0.000738743	0.00542951	0.0805374	0.0122036	0.0192913	172	36.2	179.1	105.4	61.7	5.68	11.88	5.72	9.66	4.79	163.2	176.8	38.9
FALSE	High	IsMasterProtein	Q03558	OYE2	D3DLC8; E9P8V8; Q03558; sce:YHR179W	NADPH dehydrogenase 2 [OS=Saccharomyces cerevisiae S288C]	4.417	1	4	1	1	1	1	45	3.58	4	1	1	24	0	0.598	0.581	0.637	1.049	-0.74	-0.78	-0.65	0.07	0.600834	0.55174	0.705213	0.974547	1	1	1	1	74.4	72.2	79.1	130.4	124.3	29.06	3.53	5.73	56.68	1.67	54.2	82.2	66.4
FALSE	High	None	Q03964	TY1A-DR2	D6VSF2; Q03964; sce:YDR170W-A	Transposon Ty1-DR2 Gag polyprotein [OS=Saccharomyces cerevisiae S288C]	17.352	0	6	3	5	0	1	49.4	9.86	6	5	3	20	0	1.493	1.283	1.428	4.998	0.58	0.36	0.51	2.32	0.580332	0.888847	0.678415	0.00129442	1	1	1	0.0291626	74.8	64.3	71.6	250.4	50.1	6.75	5.15	8.01	26.43	41.34	69.1	62.8	58.7
FALSE	High	IsMasterProtein	P21954	IDP1	D6VRT1; P21954; sce:YDL066W	Isocitrate dehydrogenase [NADP], mitochondrial [OS=Saccharomyces cerevisiae S288C]	17.575	0	9	3	4	3	3	48.2	13.43	9	4	3	96	0
FALSE	High	IsMasterProtein	P39985	POL5	D3DLJ5; P39985; Q9Y737; sce:YEL055C	rDNA transcriptional regulator POL5 [OS=Saccharomyces cerevisiae S288C]	5.692	0	2	1	1	1	1	115.8	3.43	2	1	1	125	0
FALSE	High	IsMasterProtein	P25039	MEF1	D6VY70; P25039; Q6B1Y6; Q99360; sce:YLR069C	Elongation factor G, mitochondrial [OS=Saccharomyces cerevisiae S288C]	18.847	0	8	5	5	5	5	84.5	13.79	8	5	5	89	0	1.441	0.78	0.895	0.842	0.53	-0.36	-0.16	-0.25	0.124653	0.379258	0.918508	0.689786	0.406999	1	1	1	144.4	78.2	89.7	84.4	100.2	10.55	5.14	1.16	12.29	16.88	144.7	168	81.4
FALSE	High	IsMasterProtein	P10964	RPA190	D6W336; P10964; Q99330; sce:YOR341W	DNA-directed RNA polymerase I subunit RPA190 [OS=Saccharomyces cerevisiae S288C]	61.836	0	9	14	20	13	14	186.3	58.96	9	20	14	97	0	0.76	0.948	0.871	0.881	-0.4	-0.08	-0.2	-0.18	0.334187	0.997116	0.861023	0.873476	0.752553	1	1	1	85	106	97.4	98.5	111.9	4.4	18.21	7.25	15.29	9.67	87.3	82.1	120.2
FALSE	High	IsMasterProtein	P36124	SET3	D6VX94; P36124; sce:YKR029C	SET domain-containing protein 3 [OS=Saccharomyces cerevisiae S288C]	5.614	0	2	1	1	1	1	85.4	4.17	2	1	1	119	0
FALSE	High	None	Q12260	TY2A-B	D6VPQ5; Q12260; sce:YBL100W-A	Transposon Ty2-B Gag polyprotein [OS=Saccharomyces cerevisiae S288C]	14.501	0	10	4	5	0	4	49.9	13.48	10	5	4	21	0	3.074	1.441	3.574	3.589	1.62	0.53	1.84	1.84	0.0609375	0.833863	0.0340986	0.012633	0.28506	1	0.262948	0.108324	134.4	63	156.2	156.9	43.7	10.78	6.25	17.05	51.89	8.28	127.5	109.5	53
FALSE	Medium	IsMasterProtein	Q02648	TRM44	D6W3Y3; Q02648; Q03090; Q2XN15; sce:YPL030W	tRNA (uracil-O(2)-)-methyltransferase [OS=Saccharomyces cerevisiae S288C]	1.973	13	2	1	1	1	1	64.8	2.3	2	1	1	51	0	0.643	0.751	0.591	9.058	-0.64	-0.41	-0.76	3.18	0.967264	0.995006	0.935047	0.10395	1	1	1	0.398548	29.9	34.9	27.5	421.6	46.5	12.72	18.83	22.71	68.44	26.58	30.9	25.8	37.7
FALSE	High	IsMasterProtein	Q07418	PEX19	D6VRT2; Q07418; sce:YDL065C	Peroxisomal membrane protein import receptor PEX19 [OS=Saccharomyces cerevisiae S288C]	22.318	0	16	3	4	3	3	38.7	12.45	16	4	3	74	0	0.789	0.466	0.582	0.549	-0.34	-1.1	-0.78	-0.87	0.969766	0.274942	0.574733	0.740778	1	0.899162	1	1	114.3	67.5	84.3	79.5	144.8	22.66	14.71	16.47	53.73	14.5	92.3	127.5	71.1
FALSE	High	IsMasterProtein	P05317	RPP0	D6VYX8; P05317; sce:YLR340W	60S acidic ribosomal protein P0 [OS=Saccharomyces cerevisiae S288C]	37.55	0	25	8	10	8	8	33.7	31.13	25	10	8	71	0	0.418	1.135	0.513	1.019	-1.26	0.18	-0.96	0.03	0.253671	0.998856	0.479067	0.996836	0.635622	1	1	1	52.1	141.6	63.9	127.2	124.8	1.93	16.3	4.35	49.2	41.92	52.1	50.7	156.9
FALSE	High	IsMasterProtein	P39003	HXT6	D6VSX4; P39003; sce:YDR343C	High-affinity hexose transporter HXT6 [OS=Saccharomyces cerevisiae S288C]	8.513	0	4	1	3	0	1	62.7	11.82	4	3	1	62	0	0.296	0.469	0.421	1.139	-1.75	-1.09	-1.25	0.19	0.148006	0.516617	0.39608	0.999911	0.458379	1	1	1	43	68.1	61.1	165.3	145.2	13.53	6.03	27.32	50.68	27.49	45.8	37.8	68.8
FALSE	High	IsMasterProtein	P14540	FBA1	D6VXM7; P14540; sce:YKL060C	Fructose-bisphosphate aldolase [OS=Saccharomyces cerevisiae S288C]	77.767	0	37	12	18	12	12	39.6	65.35	37	18	12	88	0	0.945	1.42	0.914	0.877	-0.08	0.51	-0.13	-0.19	0.998494	0.289452	0.987785	0.931782	1	0.928935	1	1	88.9	133.6	86	82.5	94.1	2.2	29.45	6.94	7.92	21.43	88	90.7	108.7
FALSE	High	IsMasterProtein	P41807	VMA13	D6W446; P41807; sce:YPR036W	V-type proton ATPase subunit H [OS=Saccharomyces cerevisiae S288C]	112.051	0	41	16	23	16	16	54.4	86.38	41	23	16	95	0	4.104	1.161	2.574	1.214	2.04	0.22	1.36	0.28	1.91896e-05	0.676423	0.000268458	0.425961	0.00542951	1	0.0280417	0.939404	211.9	60	132.9	62.7	51.6	7.06	2.48	13.84	14.06	4.08	207.4	229.2	62.8
FALSE	High	None	P24784	DBP1	D6W3P9; P20446; P24784; sce:YPL119C	ATP-dependent RNA helicase DBP1 [OS=Saccharomyces cerevisiae S288C]	31.502	0	8	5	8	0	4	67.9	21.6	8	8	5	107	0	5.643	1.946	3.671	2.52	2.5	0.96	1.88	1.33	0.000437665	0.0821686	0.00257585	0.0111009	0.0218642	0.421794	0.0657702	0.107375	210.8	72.7	137.1	94.1	37.3	1.06	1.75	30.9	2.51	22.08	211.7	208.6	71.6
FALSE	High	None	P33416	HSP78	D6VSN8; P33416; Q12137; sce:YDR258C	Heat shock protein 78, mitochondrial [OS=Saccharomyces cerevisiae S288C]	2.912	4	1	1	1	0	1	91.3	1.9	1	1	1	74	0	1.522	2.866	1.752	1.168	0.61	1.52	0.81	0.22	0.244981	0.00537098	0.094615	0.921731	0.62531	0.123318	0.402639	1	95.9	180.6	110.4	73.6	63	31.4	5.02	10.29	10.25	10.38	129.4	82.4	187.7
FALSE	High	IsMasterProtein	P10961	HSF1	D6VU70; P10961; P11529; sce:YGL073W	Heat shock transcription factor [OS=Saccharomyces cerevisiae S288C]	17.343	0	5	4	4	4	4	93.2	11.47	5	4	4	123	0	0.142	0.076	0.206	0.169	-2.82	-3.71	-2.28	-2.56	0.0111018	0.00227229	0.03322	0.0175075	0.102306	0.0809773	0.261437	0.129781	48.1	25.8	69.9	57.3	339.3	14.38	10.41	10.26	50.87	7.66	52.5	42.8	27.5
FALSE	High	IsMasterProtein	P0C2H8	RPL31A	D6VRS4; P04649; P0C2H8; Q3E7B8; sce:YDL075W	60S ribosomal protein L31-A [OS=Saccharomyces cerevisiae S288C]	7.671	0	17	2	2	0	2	12.9	6.22	17	2	2	49	0	1.638	4.439	2.588	3.36	0.71	2.15	1.37	1.75	0.906235	0.13116	0.463702	0.0973337	1	0.568898	1	0.386977	67	181.4	105.8	137.3	40.9	5.07	3.45	8.95	73.39	15	53.1	57	152.7
FALSE	High	IsMasterProtein	Q08831	VTS1	D6W354; Q08831; sce:YOR359W	RNA-binding protein VTS1 [OS=Saccharomyces cerevisiae S288C]	9.452	0	4	3	3	3	3	57.5	4.63	4	3	3	142	0	1.729	0.629	1.491	5.939	0.79	-0.67	0.58	2.57	0.34163	0.481524	0.61143	0.00268293	0.763683	1	1	0.0467073	86.7	31.5	74.7	297.7	50.1	8.86	12.25	34.13	0.32	12.95	99	87.3	31
FALSE	High	IsMasterProtein	P49167	RPL38	D6VYW7; P49167; sce:YLR325C	60S ribosomal protein L38 [OS=Saccharomyces cerevisiae S288C]	8.563	0	28	2	3	2	2	8.8	8.45	28	3	2	55	0	0.83	3.116	1.272	1.309	-0.27	1.64	0.35	0.39	0.999735	0.614953	0.999074	1	1	1	1	1	53.9	202.3	82.6	85	64.9	0.27	38.18	3.54	88.33	17.55	52.2	52.4	258.9
FALSE	High	IsMasterProtein	Q12308	TFC8	D6W405; Q12308; sce:YPL007C	Transcription factor tau 60 kDa subunit [OS=Saccharomyces cerevisiae S288C]	4.219	3	2	2	2	2	2	67.6	3.59	2	2	2	55	0	1.137	0.964	1.464	1.274	0.19	-0.05	0.55	0.35	0.999457	0.999999	0.932712	0.575141	1	1	1	1	98.4	83.4	126.6	110.2	86.5	12.59	14.54	14.68	81.7	12.19	87.8	73.4	61.4
FALSE	High	IsMasterProtein	Q04372	TAP42	D6VZK2; Q04372; Q05039; sce:YMR028W	Type 2A phosphatase-associated protein 42 [OS=Saccharomyces cerevisiae S288C]	5.179	1	6	1	1	1	1	42.5	3.71	6	1	1	75	0	1.069	0.653	0.743	0.855	0.1	-0.61	-0.43	-0.23	0.999778	0.611797	0.854859	0.899527	1	1	1	1	115.6	70.6	80.3	92.4	108.1	8.99	20.85	7.93	30.51	38.77	109.1	123.9	82.4
FALSE	High	IsMasterProtein	P38080	AKL1	D6VQ59; P38080; sce:YBR059C	Serine/threonine-protein kinase AKL1 [OS=Saccharomyces cerevisiae S288C]	93.777	0	23	21	25	21	21	123.9	77.34	23	25	21	74	0	1.376	0.741	1.706	1.27	0.46	-0.43	0.77	0.34	0.891087	0.911729	0.550379	0.999993	1	1	1	1	119.2	64.2	147.9	110.1	86.7	9.24	13.39	0.92	45.43	4.58	131.7	115.6	73
FALSE	High	IsMasterProtein	P38837	NSG1	D3DL82; P38837; Q6Q5G1; sce:YHR133C	Protein NSG1 [OS=Saccharomyces cerevisiae S288C]	5.431	1	5	2	2	2	2	32.2	2.89	5	2	2	41	0	1.352	0.897	1.141	0.7	0.43	-0.16	0.19	-0.51	0.997612	0.999983	0.999957	0.986941	1	1	1	1	137.9	91.5	116.4	71.4	102	15.59	19.46	3.94	129.74	1.77	104.9	84.1	71.6
FALSE	High	IsMasterProtein	P11412	ZWF1	D6W0V2; E9P908; P11412; sce:YNL241C	Glucose-6-phosphate 1-dehydrogenase [OS=Saccharomyces cerevisiae S288C]	4.135	3	2	1	1	1	1	57.5	2.79	2	1	1	62	0	0.844	1.071	0.862	0.969	-0.25	0.1	-0.21	-0.05	0.919759	0.998347	0.951326	0.999962	1	1	1	1	79.1	100.4	80.8	90.8	93.8	9.42	8.42	1.99	28.15	30.07	90.9	79.6	114.6
FALSE	High	None	Q12439	TY2A-OR1	D6W2Q1; Q12439; sce:YOR192C-A	Transposon Ty2-OR1 Gag polyprotein [OS=Saccharomyces cerevisiae S288C]	17.136	0	15	5	6	0	5	49.7	16.45	15	6	5	21	0	2.392	1.145	2.81	3.232	1.26	0.2	1.49	1.69	0.0956673	0.994179	0.0460419	0.0123355	0.355734	1	0.276497	0.107375	123.9	59.3	145.6	167.4	51.8	10.35	8.48	17.49	46.9	2.08	120.5	104.1	50.5
FALSE	High	IsMasterProtein	P46669	RPA43	D6W335; P46669; Q99187; sce:YOR340C	DNA-directed RNA polymerase I subunit RPA43 [OS=Saccharomyces cerevisiae S288C]	141.904	0	47	16	95	16	16	36.2	196.18	47	95	16	82	0	0.347	0.589	0.363	0.4	-1.53	-0.76	-1.46	-1.32	0.000590128	0.031072	0.000774852	0.000870181	0.0242163	0.244319	0.0405212	0.0222186	61.9	105.1	64.7	71.3	178.5	10.34	19.82	5.31	13.82	13.95	58.5	67.7	92.8
FALSE	High	IsMasterProtein	P39935	TIF4631	D6VUU6; P39935; sce:YGR162W	Eukaryotic initiation factor 4F subunit p150 [OS=Saccharomyces cerevisiae S288C]	180.39	0	39	31	47	29	29	107	133.22	39	47	31	120	2	2.369	0.555	2.197	3.457	1.24	-0.85	1.14	1.79	0.124685	0.389991	0.172833	0.0345139	0.406999	1	0.591669	0.18884	133.3	31.2	123.6	194.6	56.3	9.93	3.96	8.2	42.85	5.93	138.8	120.6	29.4
FALSE	High	IsMasterProtein	P43583	BLM10	D6VTM3; P43583; P43584; sce:YFL007W	Proteasome activator BLM10 [OS=Saccharomyces cerevisiae S288C]	3.475	3	1	1	1	1	1	245.8	3.69	1	1	1	116	0	0.515	0.749	0.783	0.813	-0.96	-0.42	-0.35	-0.3	0.166312	0.814017	0.891819	0.907109	0.491241	1	1	1	60.1	87.4	91.4	94.9	116.7	23.73	17.2	13.25	29.88	30.3	50.3	70.6	97.9
FALSE	High	IsMasterProtein	Q07533	CYK3	D6VRN3; Q07533; sce:YDL117W	Cytokinesis protein 3 [OS=Saccharomyces cerevisiae S288C]	6.294	0	2	2	2	1	2	100.6	4.82	2	2	2	51	0	0.791	0.167	0.737	0.655	-0.34	-2.59	-0.44	-0.61	0.9878	0.0282774	0.962763	0.87746	1	0.236855	1	1	118.8	25	110.6	98.3	150.1	40.87	57.16	18.87	11.25	23.41	168.1	92.7	40.4
FALSE	High	IsMasterProtein	P38061	RPL32	A2TBM1; D6VPR1; P38061; sce:YBL092W	60S ribosomal protein L32 [OS=Saccharomyces cerevisiae S288C]	20.355	0	34	6	8	6	6	14.8	19.54	34	8	6	46	0	0.855	3.268	1.369	1.278	-0.23	1.71	0.45	0.35	0.989642	0.0255696	0.843531	0.729171	1	0.22755	1	1	56.6	216.3	90.6	84.6	66.2	41.2	30.82	0.71	21.48	6.82	74.2	40.7	262.2
FALSE	High	IsMasterProtein	P0CX30	RPS23B	D6VUP9; P0CX30; P32827; sce:YGR118W; sce:YPR132W	40S ribosomal protein S23-B [OS=Saccharomyces cerevisiae S288C]	59.912	0	54	9	18	9	9	16	60.56	54	18	9	66	0	0.981	2.644	1.494	1.834	-0.03	1.4	0.58	0.88	0.999991	0.00232774	0.173531	0.0284998	1	0.0809773	0.591669	0.16793	61.8	166.7	94.2	115.6	63	10.37	4.34	14.08	8.85	12.63	66.1	57.1	170.8
FALSE	High	IsMasterProtein	Q3E754	RPS21B	D6VW49; P05760; Q3E754; sce:YJL136C	40S ribosomal protein S21-B [OS=Saccharomyces cerevisiae S288C]	20.018	0	56	6	8	1	6	9.8	16.64	56	8	6	77	0	0.797	0.779	0.773	0.969	-0.33	-0.36	-0.37	-0.05	0.691474	0.614808	0.588636	0.963044	1	1	1	1	89.5	87.5	86.8	108.8	112.3	17.19	20	10.16	17.58	3.49	79.7	101.7	101.5
FALSE	High	IsMasterProtein	Q05050	EIS1	D6VZK5; Q05050; sce:YMR031C	Eisosome protein 1 [OS=Saccharomyces cerevisiae S288C]	84.941	0	22	19	25	19	19	93.3	69.69	22	25	19	11	0	2.938	1.725	2.209	1.564	1.55	0.79	1.14	0.64	0.0576937	0.490598	0.189626	0.803811	0.27677	1	0.619692	1	164.9	96.9	124	87.8	56.1	28.96	16.42	1.12	42.64	17.68	205.2	135.4	87.1
FALSE	High	IsMasterProtein	P46672	ARC1	D6VU41; P46672; sce:YGL105W	tRNA-aminoacylation cofactor ARC1 [OS=Saccharomyces cerevisiae S288C]	470.888	0	78	39	437	39	39	42.1	1447.33	78	437	39	76	0	0.356	0.854	0.523	0.421	-1.49	-0.23	-0.94	-1.25	0.00519966	0.935527	0.0575448	0.00539472	0.0699213	1	0.324113	0.0755918	53.4	128.1	78.5	63.2	150	23.12	22.25	11	15.9	9.37	46.7	64.9	112.8
FALSE	High	IsMasterProtein	P19881	PHO13	D6VRC0; P19881; Q07689; sce:YDL236W	4-nitrophenylphosphatase [OS=Saccharomyces cerevisiae S288C]	5.02	1	8	2	2	2	2	34.6	4.41	8	2	2	23	0	1.27	1.419	1.379	1.019	0.34	0.5	0.46	0.03	0.813378	0.521474	0.596552	0.999595	1	1	1	1	100.5	112.4	109.2	80.7	79.2	22.72	4.05	3.34	20.76	34.82	85.5	118.2	115.6
FALSE	High	IsMasterProtein	P39077	CCT3	D6VWG3; P39077; sce:YJL014W	T-complex protein 1 subunit gamma [OS=Saccharomyces cerevisiae S288C]	85.867	0	43	20	23	20	20	58.8	63.12	43	23	20	46	0	1.975	0.696	1.356	0.837	0.98	-0.52	0.44	-0.26	0.00127608	0.0416641	0.089287	0.28813	0.0349086	0.289881	0.390079	0.757577	172.8	60.9	118.7	73.2	87.5	10.16	11.03	7.25	3.21	16.73	189.8	164.4	57.6
FALSE	Medium	IsMasterProtein	Q12461	RRD2	D6W3L7; Q12461; sce:YPL152W	Serine/threonine-protein phosphatase 2A activator 2 [OS=Saccharomyces cerevisiae S288C]	1.923	17	7	2	2	2	2	41.4	0	7	2	2	59	0
FALSE	High	IsMasterProtein	P39969	BOI2	D3DM20; P39969; sce:YER114C	Protein BOI2 [OS=Saccharomyces cerevisiae S288C]	14.809	0	6	4	4	3	3	115.6	9.84	6	4	4	73	1	1.306	1.292	1.144	1.134	0.39	0.37	0.19	0.18	0.568427	0.604057	0.945556	0.956914	1	1	1	1	116.7	115.4	102.2	101.3	89.3	2.8	4.75	5.82	27.01	4.9	113.8	118.4	118.8
FALSE	High	IsMasterProtein	P42943	CCT7	D6VW73; P42943; sce:YJL111W	T-complex protein 1 subunit eta [OS=Saccharomyces cerevisiae S288C]	16.931	0	7	4	5	4	4	59.7	9.2	7	5	4	46	0	1.088	1.032	1.097	1.316	0.12	0.05	0.13	0.4	0.997892	0.999982	0.996833	0.273101	1	1	1	0.732234	99.3	94.2	100.1	120.1	91.3	4.91	6.85	5.29	36.13	20.05	88.3	94.7	91
FALSE	High	IsMasterProtein	P38809		D3DL47; P38809; sce:YHR097C	Uncharacterized protein YHR097C [OS=Saccharomyces cerevisiae S288C]	14.425	0	13	4	4	4	4	40.6	13.14	13	4	4	14	0	1.836	0.849	1.427	1.256	0.88	-0.24	0.51	0.33	0.673013	0.997911	0.939914	0.584741	1	1	1	1	151.7	70.1	117.9	103.8	82.6	7.8	4.99	11.64	80.02	2.83	134.2	120.1	56.7
FALSE	High	IsMasterProtein	P40340	YTA7	D6VV47; P40340; sce:YGR270W	ATPase histone chaperone YTA7 [OS=Saccharomyces cerevisiae S288C]	3.751	3	1	1	1	1	1	157.3	2.28	1	1	1	141	0	0.288	0.128	0.319	0.275	-1.8	-2.96	-1.65	-1.86	0.458457	0.106052	0.535009	0.800114	0.905636	0.505175	1	1	79.4	35.4	87.8	75.7	275.7	29.71	27.96	10.21	117.66	8.36	75.5	49.3	33.3
FALSE	Medium	IsMasterProtein	P25340	ERG4	D6VUC5; E9P929; P25340; sce:YGL012W	Delta(24(24(1)))-sterol reductase ERG4 [OS=Saccharomyces cerevisiae S288C]	1.991	13	2	1	1	1	1	56	0	2	1	1	62	0
FALSE	High	None	P0C2J5	TY2B-LR2	P0C2J5	Transposon Ty2-LR2 Gag-Pol polyprotein [OS=Saccharomyces cerevisiae S288C]	17.136	0	4	5	6	0	5	182.5	16.45	4	6	5	95	0	2.392	1.145	2.81	3.232	1.26	0.2	1.49	1.69	0.0956673	0.994179	0.0460419	0.0123355	0.355734	1	0.276497	0.107375	123.9	59.3	145.6	167.4	51.8	10.35	8.48	17.49	46.9	2.08	120.5	104.1	50.5
FALSE	High	IsMasterProtein	P38165	RTG3	D6VPQ0; P38165; P89494; sce:YBL103C	Retrograde regulation protein 3 [OS=Saccharomyces cerevisiae S288C]	14.787	0	11	3	5	3	3	54.1	14.41	11	5	3	129	0	1.18	1.162	1.731	1.534	0.24	0.22	0.79	0.62	0.997472	0.998368	0.724888	0.671495	1	1	1	1	96	94.6	140.9	124.8	81.3	10.13	28.04	44.5	56.23	3.88	80.8	93.2	104.5
FALSE	High	None	P0C2J4	TY2A-LR1	D6VZ46; P0C2J4; sce:YLR410W-A	Transposon Ty2-LR1 Gag polyprotein [OS=Saccharomyces cerevisiae S288C]	17.136	0	15	5	6	0	5	49.7	16.45	15	6	5	21	0	2.392	1.145	2.81	3.232	1.26	0.2	1.49	1.69	0.0956673	0.994179	0.0460419	0.0123355	0.355734	1	0.276497	0.107375	123.9	59.3	145.6	167.4	51.8	10.35	8.48	17.49	46.9	2.08	120.5	104.1	50.5
FALSE	High	IsMasterProtein	P24583	PKC1	D6VPP8; P24583; sce:YBL105C	Protein kinase C-like 1 [OS=Saccharomyces cerevisiae S288C]	44.581	0	14	15	15	14	15	131.4	33.05	14	15	15	140	0	0.901	1.059	1.034	0.751	-0.15	0.08	0.05	-0.41	0.999257	0.99996	0.999997	0.999979	1	1	1	1	95.1	111.8	109.2	79.4	105.6	17.1	1.67	8.72	61.46	12.13	100.9	79.1	103.8
FALSE	High	IsMasterProtein	P41920	YRB1	D6VRY9; P41920; sce:YDR002W	Ran-specific GTPase-activating protein 1 [OS=Saccharomyces cerevisiae S288C]	7.762	0	17	2	2	2	2	22.9	5.67	17	2	2	91	0	1.457	0.161	0.708	0.434	0.54	-2.63	-0.5	-1.2	0.86671	0.0132893	0.900925	0.276575	1	0.171592	1	0.739035	210.8	23.3	102.5	62.8	144.7	7.48	53.35	27.53	27.25	31.84	212.7	236.5	36.9
FALSE	High	IsMasterProtein	P22203	VMA4	D6W328; P22203; sce:YOR332W	V-type proton ATPase subunit E [OS=Saccharomyces cerevisiae S288C]	19.538	0	16	3	3	3	3	26.5	11.01	16	3	3	94	0	4.067	2.453	3.01	0.961	2.02	1.29	1.59	-0.06	0.0144601	0.0996371	0.0437232	0.999983	0.118676	0.486738	0.276497	1	191.4	115.4	141.6	45.2	47	2.06	14.81	17.49	7.65	14.71	207.8	201.8	111.2
FALSE	High	IsMasterProtein	P01123	YPT1	D6VTJ2; P01123; sce:YFL038C	GTP-binding protein YPT1 [OS=Saccharomyces cerevisiae S288C]	13.295	0	20	3	3	2	3	23.2	9.7	20	3	3	172	0	0.493	1.046	0.53	0.423	-1.02	0.06	-0.92	-1.24	0.677085	0.999998	0.757733	0.203583	1	1	1	0.613955	68.7	145.9	74	59	139.5	14.79	15.54	4.61	66.15	3.4	79.4	64.3	135.9
FALSE	High	IsMasterProtein	Q12447	PAA1	D6VS57; Q12447; sce:YDR071C	Polyamine N-acetyltransferase 1 [OS=Saccharomyces cerevisiae S288C]	8.376	0	12	2	2	2	2	21.9	6.26	12	2	2	16	0	0.97	0.676	0.707	0.735	-0.04	-0.57	-0.5	-0.44	0.999994	0.645687	0.73929	0.837961	1	1	1	1	108.2	75.4	78.9	82	111.6	25.88	11.59	22.6	36.4	14.73	89.1	129	81.1
FALSE	High	IsMasterProtein	P40070	LSM4	D3DM18; P40070; Q07091; sce:YER112W	U6 snRNA-associated Sm-like protein LSm4 [OS=Saccharomyces cerevisiae S288C]	6.348	0	14	3	3	3	3	21.3	7.26	14	3	3	158	0	0.325	1.412	0.587	0.445	-1.62	0.5	-0.77	-1.17	0.00326351	0.372688	0.102368	0.0171502	0.0552424	1	0.423098	0.127958	40.6	176.4	73.3	55.6	124.9	4.62	14.51	24.11	15.5	18.15	42.3	45.2	171.3
FALSE	High	IsMasterProtein	P38713	OSH3	D3DL23; P38713; sce:YHR073W	Oxysterol-binding protein homolog 3 [OS=Saccharomyces cerevisiae S288C]	7.333	0	3	2	2	2	2	113.7	6.8	3	2	2	116	0	1.071	0.747	1.171	1.014	0.1	-0.42	0.23	0.02	0.998478	0.616096	0.9419	1	1	1	1	1	107	74.7	117	101.3	99.9	31.88	17.26	0.79	20.24	8.04	133.8	84.6	83.9
FALSE	Low	IsMasterProtein	P32448	ASF2	D6VRF7; P32448; sce:YDL197C	Anti-silencing protein 2 [OS=Saccharomyces cerevisiae S288C]	1.08	74	1	1	1	0	1	59.3	2.38	1	1	1	34	0	0.856	0.259	0.952	0.234	-0.22	-1.95	-0.07	-2.1	0.99997	0.689682	1	0.98257	1	1	1	1	136.9	41.5	152.3	37.4	160	12.55	2.74	11.98	146.54	2.72	105.8	88.5	28.7
FALSE	High	IsMasterProteinRejected	P0C2I9	TY1B-PR1	D6W4D4; P0C2I9; sce:YPR137C-B	Transposon Ty1-PR1 Gag-Pol polyprotein [OS=Saccharomyces cerevisiae S288C]	84.31	0	13	17	22	0	0	198.4	68.03	13	22	17	97	0
FALSE	High	IsMasterProtein	P39927	PTI1	D6VUT6; P39927; sce:YGR156W	Protein PTI1 [OS=Saccharomyces cerevisiae S288C]	6.999	0	5	1	1	1	1	47	3.17	5	1	1	74	0
FALSE	Medium	IsMasterProtein	P53040	TAF6	D6VU35; P53040; sce:YGL112C	Transcription initiation factor TFIID subunit 6 [OS=Saccharomyces cerevisiae S288C]	1.551	41	2	1	1	1	1	57.9	1.95	2	1	1	149	0	0.615	0.69	0.833	0.826	-0.7	-0.53	-0.26	-0.28	0.720254	0.876417	0.992727	0.999952	1	1	1	1	76.3	85.7	103.3	102.6	124.1	32.16	11.96	10.27	60.73	25.83	54.4	86.5	83.9
FALSE	High	IsMasterProtein	Q08816	TFB6	D6W347; Q08816; sce:YOR352W	Uncharacterized protein YOR352W [OS=Saccharomyces cerevisiae S288C]	4.993	1	4	1	1	1	1	39.3	3.84	4	1	1	97	0	0.834	0.787	0.781	0.567	-0.26	-0.35	-0.36	-0.82	0.953085	0.870215	0.857117	0.136871	1	1	1	0.481978	100.2	94.5	93.8	68.1	120.1	26.32	0.74	25.74	27.59	18.58	84.5	123.1	95.7
FALSE	High	IsMasterProtein	Q08162	DIS3	D6W244; Q08162; sce:YOL021C	Exosome complex exonuclease DIS3 [OS=Saccharomyces cerevisiae S288C]	3.978	3	2	1	1	1	1	113.6	3.32	2	1	1	187	0
FALSE	High	IsMasterProtein	P40069	KAP123	D3DM16; P40069; sce:YER110C	Importin subunit beta-4 [OS=Saccharomyces cerevisiae S288C]	4.007	3	2	1	1	1	1	122.5	4.17	2	1	1	70	0	0.454	0.729	0.545	0.516	-1.14	-0.46	-0.88	-0.95	0.100625	0.783353	0.249672	0.296838	0.365879	1	0.741273	0.766443	64.6	103.8	77.6	73.5	142.4	30.9	4.31	19.66	30.51	31.98	50.7	79.1	98.6
FALSE	High	None	P07560	SEC4	D6VTM4; P07560; sce:YFL005W	Ras-related protein SEC4 [OS=Saccharomyces cerevisiae S288C]	2.888	4	5	1	1	0	1	23.5	3.28	5	1	1	145	0	0.282	0.574	0.408	0.342	-1.83	-0.8	-1.29	-1.55	0.0127756	0.346039	0.0684596	0.0137182	0.11037	1	0.352736	0.112634	52.3	106.3	75.6	63.3	185.2	3.06	13.2	16.54	29.64	21.64	52.3	54.6	119.2
FALSE	High	IsMasterProtein	P04806	HXK1	D6VTT6; P04806; sce:YFR053C	Hexokinase-1 [OS=Saccharomyces cerevisiae S288C]	31.662	0	20	6	8	5	5	53.7	25.43	20	8	6	126	0	6.312	3.689	5.174	2.384	2.66	1.88	2.37	1.25	0.0464386	0.183021	0.0768336	0.251927	0.250798	0.702704	0.371743	0.703109	190.9	111.6	156.5	72.1	30.2	37.32	69.61	20.31	61.19	11.95	230.9	134.5	60.1
FALSE	High	None	P47100	TY1B-JR2	D6VWK1; P47100; P87195; sce:YJR029W	Transposon Ty1-JR2 Gag-Pol polyprotein [OS=Saccharomyces cerevisiae S288C]	78.441	0	12	16	21	0	0	198.5	63.51	12	21	16	97	0
FALSE	High	IsMasterProtein	P06738	GPH1	D6W4G1; P06738; sce:YPR160W	Glycogen phosphorylase [OS=Saccharomyces cerevisiae S288C]	7.241	0	2	1	1	1	1	103.2	4.47	2	1	1	51	0
FALSE	High	IsMasterProtein	P32803	EMP24	D6VTV4; P32803; sce:YGL200C	Endosomal protein P24B [OS=Saccharomyces cerevisiae S288C]	3.205	3	6	1	1	1	1	23.3	3.24	6	1	1	65	0	0.622	1.277	0.935	1.535	-0.69	0.35	-0.1	0.62	0.80864	0.984042	0.999966	0.636083	1	1	1	1	56.6	116.4	85.2	139.9	91.1	5.21	28.61	18.69	67.13	21.45	51.6	47.9	125.5
FALSE	High	IsMasterProtein	P00498	HIS1	D3DLV8; P00498; sce:YER055C	ATP phosphoribosyltransferase [OS=Saccharomyces cerevisiae S288C]	11.506	0	12	4	4	4	4	32.2	6.76	12	4	4	54	0	1.18	1.979	1.42	1.41	0.24	0.98	0.51	0.5	0.980012	0.175607	0.716832	0.459525	1	0.681071	1	0.996216	84.6	141.9	101.9	101.1	71.7	1.09	20.49	9.26	40.23	2.88	80.6	81.9	157.6
FALSE	High	IsMasterProtein	P53865	CNM67	D6W0W5; P53865; sce:YNL225C	Chaotic nuclear migration protein 67 [OS=Saccharomyces cerevisiae S288C]	14.195	0	6	4	4	4	4	67.4	8.23	6	4	4	64	0	2.528	1.055	2.095	1.583	1.34	0.08	1.07	0.66	0.30084	0.999991	0.498292	0.560064	0.716558	1	1	1	168	70.1	139.3	105.2	66.5	8.99	8.39	11.67	73.86	25.84	161.6	142.3	67.2
FALSE	Low	IsMasterProtein	Q03944	VPS64	D6VSI2; Q03944; sce:YDR200C	Vacuolar protein sorting-associated protein 64 [OS=Saccharomyces cerevisiae S288C]	1.007	78	1	1	1	1	1	67.2	2.19	1	1	1	52	0	37.165	19.897	31.621	11.9	5.22	4.31	4.98	3.57	0.654947	0.788267	0.69028	0.6364	1	1	1	1	217.9	116.6	185.4	69.8	5.9	21.91	4.54	43.67	171.84	13.55	21.6	15.8	10.2
FALSE	High	IsMasterProtein	P06776	PDE2	D6W355; P06776; Q08836; sce:YOR360C	3',5'-cyclic-nucleotide phosphodiesterase 2 [OS=Saccharomyces cerevisiae S288C]	4.012	3	3	1	1	1	1	61	3.24	3	1	1	28	0
FALSE	Medium	IsMasterProtein	P54885	PRO2	D6W321; P54885; sce:YOR323C	Gamma-glutamyl phosphate reductase [OS=Saccharomyces cerevisiae S288C]	1.796	26	1	1	1	1	1	49.7	2.23	1	1	1	55	0
FALSE	High	IsMasterProtein	P40483		D6VVH9; P40483; Q6B2N8; sce:YIL108W	Putative zinc metalloproteinase YIL108W [OS=Saccharomyces cerevisiae S288C]	16.457	0	9	7	9	7	7	77.4	15.14	9	9	7	20	0	1.331	1.015	1.507	2.483	0.41	0.02	0.59	1.31	0.476475	0.999998	0.186817	0.00239655	0.914689	1	0.617096	0.0458939	90.9	69.4	103	169.7	68.3	0.68	8.27	10.16	20.96	23.32	84.8	85.7	61.3
FALSE	High	IsMasterProtein	Q06698	RTZ1	D6VZ55; Q06698; sce:YLR419W	Putative ATP-dependent RNA helicase YLR419W [OS=Saccharomyces cerevisiae S288C]	3.033	3	1	1	1	1	1	162.9	2.29	1	1	1	59	0
FALSE	High	IsMasterProtein	P36006	MYO3	D6VX66; P36006; sce:YKL129C	Myosin-3 [OS=Saccharomyces cerevisiae S288C]	23.74	0	7	7	7	5	5	142.4	17.84	7	7	7	130	0	0.818	1.474	1.111	1.045	-0.29	0.56	0.15	0.06	0.956703	0.642052	0.997417	1	1	1	1	1	71.2	128.3	96.7	91	87	22.93	15.02	16.96	35.33	20.69	84.3	60.7	143.4
FALSE	High	IsMasterProtein	P38427	TSL1	D6W0I5; P38427; sce:YML100W	Trehalose synthase complex regulatory subunit TSL1 [OS=Saccharomyces cerevisiae S288C]	162.129	0	34	34	44	33	33	122.9	146.81	34	44	34	41	1	3.882	1.967	3.56	1.304	1.96	0.98	1.83	0.38	0.233677	0.797227	0.282635	0.644868	0.610215	1	0.803831	1	178.8	90.6	164	60.1	46.1	49.6	26.56	3.26	97	15.6	222.5	106.9	94.5
FALSE	High	IsMasterProtein	P06115	CTT1	D6VUM0; P06115; sce:YGR088W	Catalase T [OS=Saccharomyces cerevisiae S288C]	3.606	3	4	1	1	1	1	64.5	2.32	4	1	1	52	0
FALSE	High	IsMasterProtein	P14291	RED1	D6VYR0; P14291; sce:YLR263W	Protein RED1 [OS=Saccharomyces cerevisiae S288C]	2.546	5	1	1	1	1	1	95.5	2.86	1	1	1	122	0	1.625	0.124	0.323	0.394	0.7	-3.01	-1.63	-1.35	0.991617	0.284672	0.788602	0.999845	1	0.923173	1	1	232.5	17.8	46.3	56.3	143.1	14.01	13.01	73.48	140.51	21.42	176	144.3	13.4
FALSE	High	IsMasterProtein	P00927	ILV1	D3DLZ2; P00927; sce:YER086W	Threonine dehydratase, mitochondrial [OS=Saccharomyces cerevisiae S288C]	4.349	1	4	1	1	1	1	63.8	0	4	1	1	62	0
FALSE	High	IsMasterProteinCandidate	P0C2H9	RPL31B	D6VZ39; P04649; P0C2H9; Q3E7B8; sce:YLR406C	60S ribosomal protein L31-B [OS=Saccharomyces cerevisiae S288C]	7.671	0	17	2	2	0	2	13	6.22	17	2	2	49	0	1.638	4.439	2.588	3.36	0.71	2.15	1.37	1.75	0.906235	0.13116	0.463702	0.0973337	1	0.568898	1	0.386977	67	181.4	105.8	137.3	40.9	5.07	3.45	8.95	73.39	15	53.1	57	152.7
FALSE	High	IsMasterProtein	Q12753	HAA1	D6W419; Q12753; sce:YPR008W	Transcriptional activator HAA1 [OS=Saccharomyces cerevisiae S288C]	35.934	0	12	7	9	7	7	76.6	26.7	12	9	7	126	0	1.303	0.686	1.575	1.842	0.38	-0.54	0.66	0.88	0.784236	0.501949	0.338208	0.322208	1	1	0.903722	0.794458	107.7	56.7	130.2	152.3	82.7	1.67	3.15	15.22	32.26	3.91	107.2	109.7	55.8
FALSE	High	IsMasterProtein	P33322	CBF5	D6VYH9; P33322; sce:YLR175W	H/ACA ribonucleoprotein complex subunit CBF5 [OS=Saccharomyces cerevisiae S288C]	58.362	0	31	12	14	12	12	54.7	40.99	31	14	12	94	0	0.592	1.287	0.855	0.723	-0.76	0.36	-0.23	-0.47	0.0437546	0.480147	0.838438	0.21495	0.240546	1	1	0.638186	64.8	140.9	93.5	79.1	109.4	7.75	7.29	1.81	16.43	10.7	69.1	61.9	135.2
FALSE	High	IsMasterProtein	P10869	HOM3	D3DLV4; P10869; sce:YER052C	Aspartokinase [OS=Saccharomyces cerevisiae S288C]	2.266	5	2	1	1	1	1	58.1	2.6	2	1	1	71	0	2.525	4.047	3.481	3.054	1.34	2.02	1.8	1.61									93.3	149.6	128.7	112.9	37	5.77	25.52	22.47	33.51		84.6	91.7	169.4
FALSE	High	IsMasterProtein	P35183	AST1	D6VPT2; P35183; P89492; sce:YBL069W	Protein AST1 [OS=Saccharomyces cerevisiae S288C]	2.876	4	4	1	1	0	1	48.3	2.41	4	1	1	52	0
FALSE	High	IsMasterProtein	Q12344	GYP5	D6W3C2; Q12344; sce:YPL249C	GTPase-activating protein GYP5 [OS=Saccharomyces cerevisiae S288C]	19.735	0	8	4	4	4	4	101.7	12.52	8	4	4	63	0	0.675	0.737	0.82	0.878	-0.57	-0.44	-0.29	-0.19	0.563117	0.760759	0.943114	0.969393	1	1	1	1	74.8	81.6	90.7	97.3	110.7	12.5	9.46	0.69	31.7	22.42	67.9	81.1	86.6
FALSE	High	None	P09734	TUB3	D6W0G1; P09734; sce:YML124C	Tubulin alpha-3 chain [OS=Saccharomyces cerevisiae S288C]	10.174	0	5	3	3	0	3	49.7	7.1	5	3	3	93	0	0.301	0.525	0.31	0.528	-1.73	-0.93	-1.69	-0.92	0.385752	0.859936	0.407723	0.980639	0.831971	1	1	1	54.5	95.2	56.1	95.6	181.2	5.06	15.88	2.72	103.55	20.04	46.6	43.4	88.1
FALSE	High	IsMasterProtein	P05375	OPI3	D6VWP3; P05375; sce:YJR073C	Phosphatidyl-N-methylethanolamine N-methyltransferase [OS=Saccharomyces cerevisiae S288C]	3.604	3	4	1	1	1	1	23.1	1.95	4	1	1	62	0
FALSE	High	IsMasterProtein	P30665	MCM4	D6W429; P30665; sce:YPR019W	DNA replication licensing factor MCM4 [OS=Saccharomyces cerevisiae S288C]	18.36	0	7	7	8	7	7	104.9	17	7	8	7	145	0	1.083	1.179	0.876	0.95	0.12	0.24	-0.19	-0.07	0.999952	0.998403	0.999449	0.991868	1	1	1	1	94.8	103.2	76.7	83.2	87.5	7.48	14.05	2.79	75.1	48.13	90.5	81.4	103.3
FALSE	High	IsMasterProtein	P12945	NAT1	D6VRV5; P12945; sce:YDL040C	N-terminal acetyltransferase A complex subunit NAT1 [OS=Saccharomyces cerevisiae S288C]	3.847	3	2	1	1	1	1	98.8	3.15	2	1	1	37	0	5.984	8.108	6.187	3.658	2.58	3.02	2.63	1.87	0.0231438	0.0101152	0.021071	0.0778063	0.165169	0.14699	0.195247	0.329889	133.9	181.4	138.4	81.8	22.4	5.05	10.64	7.64	19.37	28.32	129.3	138.9	195.8
FALSE	High	IsMasterProtein	P20424	SRP54	D6W489; P20424; sce:YPR088C	Signal recognition particle subunit SRP54 [OS=Saccharomyces cerevisiae S288C]	14.848	0	7	4	4	4	4	59.6	9.57	7	4	4	91	0	0.973	0.918	1.015	0.933	-0.04	-0.12	0.02	-0.1	1	0.999983	1	0.804225	1	1	1	1	95.9	90.5	100.1	91.9	98.6	10.55	11.59	12.97	66.78	10.59	109.7	94.5	104.4
FALSE	Low	IsMasterProtein	P13259	PCT1	D6VUY4; P13259; sce:YGR202C	Choline-phosphate cytidylyltransferase [OS=Saccharomyces cerevisiae S288C]	0.999	78	3	1	1	1	1	49.4	1.75	3	1	1	59	0
FALSE	High	IsMasterProtein	Q01855	RPS15	D6W226; Q01855; sce:YOL040C	40S ribosomal protein S15 [OS=Saccharomyces cerevisiae S288C]	11.518	0	25	3	4	3	3	16	11.66	25	4	3	88	0	2.889	4.287	3.464	2.462	1.53	2.1	1.79	1.3	0.447362	0.195619	0.310739	0.51257	0.898634	0.724423	0.847739	1	110.9	164.5	132.9	94.5	38.4	19.72	21.2	5.52	50.65	26.97	121	91.4	181.4
FALSE	High	IsMasterProtein	Q12387	MDM20	D6W1Z2; Q12387; sce:YOL076W	N-terminal acetyltransferase B complex subunit MDM20 [OS=Saccharomyces cerevisiae S288C]	6.387	0	2	1	1	1	1	92.8	4.01	2	1	1	52	0	0.773	0.813	0.722	0.609	-0.37	-0.3	-0.47	-0.72	0.684619	0.826294	0.489964	0.171393	1	1	1	0.556268	92.3	97.1	86.3	72.7	119.4	9.85	15.04	1.34	23.77	16.07	92.5	106.4	116.1
FALSE	High	IsMasterProtein	P26786	RPS7A	D6W2F7; P26786; Q08502; sce:YOR096W	40S ribosomal protein S7-A [OS=Saccharomyces cerevisiae S288C]	11.543	0	17	4	4	1	1	21.6	10.22	17	4	4	73	3	0.508	1.438	0.608	1.167	-0.98	0.52	-0.72	0.22	0.74514	0.971123	0.902975	0.992441	1	1	1	1	52.5	148.6	62.8	120.6	103.3	11.72	0.67	1.09	86.34	23.24	50.1	42.4	131.2
FALSE	High	IsMasterProtein	P22213	SLY1	D6VSH2; P22213; sce:YDR189W	Protein SLY1 [OS=Saccharomyces cerevisiae S288C]	4.427	1	2	1	1	1	1	74.6	3.42	2	1	1	86	0
FALSE	Medium	IsMasterProtein	Q06263	VTA1	D6VYI5; Q06263; Q07057; sce:YLR181C	Vacuolar protein sorting-associated protein VTA1 [OS=Saccharomyces cerevisiae S288C]	1.743	31	2	1	1	1	1	37.3	2.16	2	1	1	59	0	1.381	0.433	0.887	0.541	0.47	-1.21	-0.17	-0.89	0.484546	0.0198798	0.975458	0.07566	0.924822	0.197246	1	0.328912	166.9	52.3	107.2	65.3	120.8	22.42	6.24	29.05	3.22	5.68	152.7	210.2	58.7
FALSE	Low	IsMasterProtein	Q06676	YFT2	D6VSV0; Q06676; sce:YDR319C	Acyl-coenzyme A diphosphatase YFT2 [OS=Saccharomyces cerevisiae S288C]	0.978	81	2	1	1	1	1	32	2.37	2	1	1	85	0
FALSE	High	IsMasterProtein	P38264	PHO88	D6VQA5; P38264; sce:YBR106W	SRP-independent targeting protein 3 [OS=Saccharomyces cerevisiae S288C]	2.057	10	4	1	1	1	1	21.1	2.42	4	1	1	54	0	0.889	2.293	1.098	0.89	-0.17	1.2	0.13	-0.17	0.9991	0.272713	0.999712	0.990017	1	0.894498	1	1	73.7	190.2	91	73.8	83	36	37.52	5.67	44.59	21.02	95.7	56.9	249.8
FALSE	High	IsMasterProtein	P40561	SGN1	D6VVT1; P40561; sce:YIR001C	RNA-binding protein SGN1 [OS=Saccharomyces cerevisiae S288C]	50.473	0	39	10	12	10	10	28.9	38.34	39	12	10	30	0	1.996	1.152	2.225	12.303	1	0.2	1.15	3.62	0.953189	0.99997	0.918681	0.331919	1	1	1	0.805124	57.2	33	63.8	352.7	28.7	4.59	1.47	4.62	79.32	11.46	59.3	55.5	32.8
FALSE	High	IsMasterProtein	Q08971	CHP1	D6W3E5; Q08971; sce:YPL225W	Chaperone for eEF1A; ribosome-associated chaperone,Protein PBDC1 homolog [OS=Saccharomyces cerevisiae S288C]	56.627	0	60	11	16	11	11	17.4	49.65	60	16	11	1	0	5.764	1.291	4.365	1.884	2.53	0.37	2.13	0.91	8.61571e-05	0.599901	0.000267206	0.0451577	0.0089995	1	0.0280417	0.234779	218.9	49	165.8	71.5	38	8.8	2.51	15.62	16.01	11.04	240.2	212	49.7
FALSE	High	IsMasterProtein	P42842	EMW1	D6W0N2; P42842; sce:YNL313C	Essential for maintenance of the cell wall protein 1 [OS=Saccharomyces cerevisiae S288C]	5.182	1	7	3	3	3	3	102.3	7.48	7	3	3	18	0	0.966	1.417	0.863	0.584	-0.05	0.5	-0.21	-0.78	0.999989	0.724293	0.98789	0.181574	1	1	1	0.584394	99.8	146.3	89.1	60.3	103.3	7.49	20.05	42.88	19.36	31.51	97.2	108.1	130.3
FALSE	High	IsMasterProtein	P25343	RVS161	D6VR18; P25343; sce:YCR009C	Reduced viability upon starvation protein 161 [OS=Saccharomyces cerevisiae S288C]	6.934	0	10	2	2	2	2	30.2	4.31	10	2	2	81	0	1.323	0.758	1.531	1.581	0.4	-0.4	0.61	0.66	0.997935	0.998012	0.98604	0.997754	1	1	1	1	102.5	58.7	118.6	122.6	77.5	6.98	12.78	11.83	72.59	33.05	114.4	103.6	68.3
FALSE	Low	IsMasterProteinCandidate	P38904	SPP41	D6VT89; P38904; Q03291; sce:YDR464W	Protein SPP41 [OS=Saccharomyces cerevisiae S288C]	1.08	74	0	1	1	0	1	161.5	2.38	0	1	1	21	0	0.856	0.259	0.952	0.234	-0.22	-1.95	-0.07	-2.1	0.99997	0.689682	1	0.98257	1	1	1	1	136.9	41.5	152.3	37.4	160	12.55	2.74	11.98	146.54	2.72	105.8	88.5	28.7
FALSE	Medium	IsMasterProtein	P53331	RNH70	D6VV53; P53331; sce:YGR276C	RNA exonuclease 1 [OS=Saccharomyces cerevisiae S288C]	1.459	48	3	1	1	1	1	62.8	0	3	1	1	75	0
FALSE	Medium	IsMasterProtein	P53295	RBG2	D6VUV7; P53295; sce:YGR173W	Ribosome-interacting GTPase 2 [OS=Saccharomyces cerevisiae S288C]	1.596	36	2	1	1	1	1	41	0	2	1	1	72	0
FALSE	High	IsMasterProtein	P32419	MDH3	D6VRS1; P32419; Q12689; sce:YDL078C	Malate dehydrogenase, peroxisomal [OS=Saccharomyces cerevisiae S288C]	76.256	0	49	14	20	14	14	37.2	63.89	49	20	14	73	0	0.817	0.371	0.696	0.473	-0.29	-1.43	-0.52	-1.08	0.884622	0.0104708	0.476722	0.0454886	1	0.150255	1	0.235434	116.4	52.9	99.3	67.4	142.6	3.35	6.31	4.35	34.23	8.91	119.9	114.3	50.8
FALSE	High	IsMasterProtein	P36105	RPL14A	D6VXT1; P36105; sce:YKL006W	60S ribosomal protein L14-A [OS=Saccharomyces cerevisiae S288C]	25.129	0	49	8	9	0	8	15.2	25.27	49	9	8	61	0	0.478	1.652	0.683	0.57	-1.06	0.72	-0.55	-0.81	0.443493	0.761887	0.900182	0.757358	0.897136	1	1	1	51.8	178.8	74	61.7	108.3	2.07	12.3	8.47	68.5	0.45	50.3	51.8	192.1
FALSE	High	IsMasterProtein	P39743	RVS167	D6VT22; P39743; sce:YDR388W	Reduced viability upon starvation protein 167 [OS=Saccharomyces cerevisiae S288C]	18.642	0	13	4	5	4	4	52.7	14.95	13	5	4	98	0	0.551	0.603	0.682	0.61	-0.86	-0.73	-0.55	-0.71	0.0627394	0.123355	0.299312	0.076257	0.290676	0.548884	0.839128	0.328912	73.1	80.1	90.4	81	132.7	21.25	14.6	4.18	13.33	8.96	63.6	86	89.9
FALSE	High	IsMasterProtein	P15891	ABP1	D6VR88; P15891; sce:YCR088W	Actin-binding protein [OS=Saccharomyces cerevisiae S288C]	170.932	0	61	32	52	32	32	65.5	148.47	61	52	32	99	0	1.257	0.451	2.054	0.705	0.33	-1.15	1.04	-0.51	0.2264	0.000408176	0.000775864	0.0499403	0.60077	0.0360451	0.0405212	0.247456	122	43.8	199.3	68.4	97	11.29	6.26	0.61	13.1	7.06	134.3	114.5	42.5
FALSE	High	IsMasterProtein	P32324	EFT1; EFT2	D6VT19; P32324; Q6JEF7; sce:YDR385W; sce:YOR133W	Elongation factor 2 [OS=Saccharomyces cerevisiae S288C]	204.411	0	52	34	53	34	34	93.2	186.98	52	53	34	104	0	0.458	1.263	0.535	0.614	-1.13	0.34	-0.9	-0.7	0.0239369	0.766553	0.067434	0.171867	0.167705	1	0.352189	0.556268	59	162.5	68.9	79	128.7	14.63	24.9	5.67	24.99	7.34	53.2	65.4	194.2
FALSE	High	IsMasterProtein	P14127	RPS17B	D6VT72; P14127; sce:YDR447C	40S ribosomal protein S17-B [OS=Saccharomyces cerevisiae S288C]	17.814	0	24	4	5	0	4	15.8	15.27	24	5	4	62	0	0.362	0.917	0.602	1.324	-1.47	-0.12	-0.73	0.41	0.246091	0.99991	0.806671	0.984172	0.62531	1	1	1	40.6	102.9	67.5	148.6	112.2	16.75	20.92	5.26	63.42	21.27	42.1	33.2	110
FALSE	High	IsMasterProtein	P49166	RPL37A	D6VYI8; P49166; sce:YLR185W	60S ribosomal protein L37-A [OS=Saccharomyces cerevisiae S288C]	15.887	0	31	3	4	2	3	9.8	12.47	31	4	3	84	0	0.89	1.872	1.019	1.39	-0.17	0.9	0.03	0.48	0.996115	0.239518	1	0.957261	1	0.833232	1	1	72.5	152.4	82.9	113.2	81.4	27.68	18.87	3.3	26.57	27.59	89.2	60	134.5
FALSE	High	IsMasterProtein	P29952	PMI40	D3DLP9; P29952; sce:YER003C	Mannose-6-phosphate isomerase [OS=Saccharomyces cerevisiae S288C]	17.039	0	11	3	4	3	3	48.2	10.77	11	4	3	74	0	0.815	0.769	0.847	0.578	-0.29	-0.38	-0.24	-0.79	0.575607	0.356829	0.737775	0.0273372	1	1	1	0.164453	95.7	90.2	99.4	67.8	117.4	11.6	2.49	4.3	10.42	22.23	95.1	112.1	99.1
FALSE	High	IsMasterProtein	P07278	BCY1	D6VVP9; P07278; sce:YIL033C	cAMP-dependent protein kinase regulatory subunit [OS=Saccharomyces cerevisiae S288C]	77.764	0	36	14	20	14	14	47.2	65.23	36	20	14	181	0	3.064	0.84	2.835	1.227	1.62	-0.25	1.5	0.29	0.00526022	0.931632	0.00791147	0.84107	0.0699213	1	0.116542	1	191.9	52.6	177.5	76.8	62.6	33.17	5.21	4.75	15.02	6.69	245.3	152.1	54.9
FALSE	High	IsMasterProtein	P50942	INP52	D6W174; P50942; sce:YNL106C	Polyphosphatidylinositol phosphatase INP52 [OS=Saccharomyces cerevisiae S288C]	20.703	0	7	7	7	7	7	133.2	13.95	7	7	7	96	0	1.738	0.881	1.52	1.02	0.8	-0.18	0.6	0.03	0.0033346	0.629154	0.0137501	0.999782	0.0552424	1	0.157989	1	146	74	127.7	85.7	84	8.72	4.82	7.38	14.53	3.09	167.9	148.5	77.4
FALSE	High	IsMasterProtein	P38891	BAT1	D3DLF7; P38891; sce:YHR208W	Branched-chain-amino-acid aminotransferase, mitochondrial [OS=Saccharomyces cerevisiae S288C]	35.881	0	24	7	9	7	7	43.6	32.96	24	9	7	77	0	0.812	0.925	0.678	1.094	-0.3	-0.11	-0.56	0.13	0.889145	0.998282	0.447901	0.998019	1	1	1	1	77.5	88.3	64.7	104.4	95.4	31.04	2.79	4.75	15.94	12.47	61.2	95.7	85.5
FALSE	High	None	P0CX57	TY1A-A	D6VPM2; O13528; P0CX57; sce:YAR010C; sce:YPR137C-A	Transposon Ty1-A Gag polyprotein [OS=Saccharomyces cerevisiae S288C]	66.975	0	38	12	17	0	0	49	51.99	38	17	12	21	0
FALSE	High	None	P0CX60	TY1A-PR2	D6W2K0; P0CX60; Q99209; sce:YOR142W-A; sce:YPR158W-A	Transposon Ty1-PR2 Gag polyprotein [OS=Saccharomyces cerevisiae S288C]	59.674	0	31	11	16	0	2	49.1	49.64	31	16	11	21	0	0.823	0.794	0.464	3.415	-0.28	-0.33	-1.11	1.77	0.999906	0.999786	0.949347	0.999119	1	1	1	1	61	58.8	34.4	253.1	74.1	15.42	4.46	39.15	79.75	7.12	71.9	57.8	60.3
FALSE	High	IsMasterProtein	P43597		D6VTP7; P43597; sce:YFR016C	Uncharacterized protein YFR016C [OS=Saccharomyces cerevisiae S288C]	42.982	0	8	6	8	6	6	137.6	29.69	8	8	6	0	0	1.402	0.738	1.152	0.724	0.49	-0.44	0.2	-0.47	0.997634	0.998562	0.999965	0.971205	1	1	1	1	143.8	75.7	118.2	74.3	102.6	3.34	19.56	12.02	139.61	17.54	82.9	87	38.9
FALSE	High	IsMasterProtein	P53438	SOK2	D6VZJ0; P53438; sce:YMR016C	Protein SOK2 [OS=Saccharomyces cerevisiae S288C]	3.962	3	2	2	2	1	2	85.6	2.03	2	2	2	87	0	1.854	0.982	1.314	2.4	0.89	-0.03	0.39	1.26	0.603952	1	0.97092	0.308308	1	1	1	0.771777	139.9	74.1	99.1	181.1	75.4	30.76	20.17	24.67	40.48	27.57	183.5	117.9	89.9
FALSE	Medium	IsMasterProtein	P33333	SLC1	D6VRU4; E9P8Y5; P33333; sce:YDL052C	1-acyl-sn-glycerol-3-phosphate acyltransferase [OS=Saccharomyces cerevisiae S288C]	1.945	17	2	1	1	1	1	33.9	0	2	1	1	48	0
FALSE	High	IsMasterProtein	P02829	HSP82	D6W3D1; P02829; sce:YPL240C	ATP-dependent molecular chaperone HSP82 [OS=Saccharomyces cerevisiae S288C]	233.105	0	47	35	57	2	2	81.4	196.17	47	57	35	145	0	0.577	0.793	0.673	0.451	-0.79	-0.34	-0.57	-1.15	0.513123	0.963022	0.771161	0.219219	0.955557	1	1	0.641206	77.7	106.7	90.7	60.8	134.7	7.02	25.42	4.83	52.19	7.24	86.7	78.5	135.9
FALSE	High	None	P53549	RPT4	D6W2W0; P53549; Q08718; sce:YOR259C	26S proteasome subunit RPT4 [OS=Saccharomyces cerevisiae S288C]	9.481	0	3	1	2	0	0	49.4	6.74	3	2	1	169	0	2.925	1.786	2.48	1.159	1.55	0.84	1.31	0.21	0.00802078	0.119456	0.0181934	0.954902	0.0886813	0.542038	0.180209	1	166.8	101.8	141.4	66.1	57	6.09	6.9	12.48	12	39	187.6	172.1	115.2
FALSE	High	IsMasterProtein	Q12276	HER1	D6W2T1; Q12276; sce:YOR227W	HMG2-induced ER-remodeling protein 1 [OS=Saccharomyces cerevisiae S288C]	4.075	3	1	2	2	1	2	139.4	2.42	1	2	2	7	0	2.378	3.866	3.001	3.109	1.25	1.95	1.59	1.64	0.320478	0.0692823	0.155766	0.0502765	0.735235	0.37517	0.555822	0.247456	89.6	145.6	113	117.1	37.7	0.21	13.02	19.15	55.68	55.02	80.2	80.5	119.1
FALSE	High	IsMasterProtein	P41832	BNI1	D6W0S3; O13450; P41832; sce:YNL271C	Protein BNI1 [OS=Saccharomyces cerevisiae S288C]	4.524	1	1	1	1	1	1	219.5	0	1	1	1	158	0
FALSE	High	IsMasterProtein	P20449	DBP5	D6W2B2; P20449; sce:YOR046C	ATP-dependent RNA helicase DBP5 [OS=Saccharomyces cerevisiae S288C]	25.245	0	16	6	6	6	6	53.8	19.21	16	6	6	124	0	1.701	1.212	1.458	1.129	0.77	0.28	0.54	0.18	0.130482	0.872289	0.367321	0.92719	0.417616	1	0.965793	1	129.6	92.4	111.1	86.1	76.2	12.46	1.09	1.1	13.88	38.28	118.4	141.3	91.5
FALSE	High	IsMasterProtein	Q12453	CEX1	D6W2H1; Q12453; sce:YOR112W	Cytoplasmic export protein 1 [OS=Saccharomyces cerevisiae S288C]	59.818	0	20	13	16	13	13	84.7	40.26	20	16	13	46	0	1.29	0.533	1.027	0.831	0.37	-0.91	0.04	-0.27	0.925979	0.304109	0.999998	1	1	0.954322	1	1	139.4	57.6	110.9	89.8	108.1	8.74	11.65	3.44	52.36	3.21	140.3	123.9	59.1
FALSE	High	IsMasterProtein	P33750	SOF1	D6VXZ1; P33750; sce:YLL011W	Protein SOF1 [OS=Saccharomyces cerevisiae S288C]	2.329	5	2	1	1	1	1	56.8	2.36	2	1	1	50	0	1.508	1.2	1.229	0.879	0.59	0.26	0.3	-0.19	0.18332	0.821552	0.744609	0.957368	0.521374	1	1	1	129.9	103.3	105.8	75.7	86.1	9.01	0.1	21.54	16.3	19.2	139.8	123.1	104.2
FALSE	High	IsMasterProtein	P33753	TRM2	D6VXB7; P30618; P33753; Q86ZR6; Q9HGQ5; sce:YKR056W	tRNA (uracil(54)-C(5))-methyltransferase [OS=Saccharomyces cerevisiae S288C]	5.536	1	6	2	2	2	2	72.8	2.31	6	2	2	63	0
FALSE	High	IsMasterProtein	Q3E7Y3	RPS22B	D6VZ04; P04648; Q3E7Y3; sce:YLR367W	40S ribosomal protein S22-B [OS=Saccharomyces cerevisiae S288C]	26.927	0	35	5	7	0	5	14.6	22.84	35	7	5	46	0	0.867	2.762	0.857	0.687	-0.21	1.47	-0.22	-0.54	0.997055	0.115761	0.995766	0.595018	1	0.528382	1	1	74.6	237.9	73.8	59.2	86.1	11.3	36.62	18.41	44.59	12.46	82.6	70.4	316.7
FALSE	Low	IsMasterProtein	P32772	UGX2	D6VRI2; P32772; sce:YDL169C	Protein UGX2 [OS=Saccharomyces cerevisiae S288C]	1.021	77	11	1	1	1	1	25.7	0	11	1	1	0	0	0.403	0.715	0.596	0.49	-1.31	-0.48	-0.75	-1.03	0.215702	0.918918	0.689452	0.192103	0.581789	1	1	0.600053	56.6	100.6	83.9	68.9	140.6	26.22	15.93	17.33	47.34	35.35	48	69.8	115.1
FALSE	High	IsMasterProtein	Q01476	UBP2	D6W2I2; Q01476; Q99357; sce:YOR124C	Ubiquitin carboxyl-terminal hydrolase 2 [OS=Saccharomyces cerevisiae S288C]	32.15	0	9	6	9	6	6	146.3	30.45	9	9	6	74	0	0.237	0.336	0.319	0.287	-2.08	-1.58	-1.65	-1.8	5.76776e-05	0.000355428	0.000265269	9.53686e-05	0.00714207	0.0353381	0.0280417	0.00913154	46.6	66.1	62.8	56.5	196.9	14	5.67	1.21	8.29	5.94	43.2	52.7	70.5
FALSE	High	IsMasterProtein	Q04223		D6VZV3; Q04223; sce:YMR130W	Uncharacterized protein YMR130W [OS=Saccharomyces cerevisiae S288C]	6.385	0	4	1	2	1	1	35.3	7.32	4	2	1	12	0	0.91	0.669	0.959	0.906	-0.14	-0.58	-0.06	-0.14	0.997541	0.520353	0.999948	0.847619	1	1	1	1	96.3	70.8	101.4	95.8	105.8	22.78	3.37	0.86	27.4	31.56	83.4	115.5	73.9
FALSE	High	IsMasterProtein	P53905	LSM7	D6W135; P53905; sce:YNL147W	U6 snRNA-associated Sm-like protein LSm7 [OS=Saccharomyces cerevisiae S288C]	5.181	1	13	2	2	2	2	13	5.36	13	2	2	153	0	2.434	1.804	2.907	3.609	1.28	0.85	1.54	1.85	0.00307109	0.0290206	0.0010147	0.000136956	0.0552424	0.237615	0.0455965	0.0112402	110.7	82.1	132.2	164.2	45.5	13.58	9.17	11.66	9.81	7.07	93.7	113.6	81.6
FALSE	High	IsMasterProtein	P38701	RPS20	D3DKP7; P38701; sce:YHL015W	40S ribosomal protein S20 [OS=Saccharomyces cerevisiae S288C]	25.154	0	37	5	9	5	5	13.9	22.69	37	9	5	64	0	0.959	1.752	0.712	0.524	-0.06	0.81	-0.49	-0.93	0.999988	0.473306	0.846699	0.242674	1	1	1	0.688475	103.1	188.3	76.5	56.3	107.5	1.99	41.61	25.15	19.57	33.31	105.7	102.8	257.8
FALSE	High	IsMasterProtein	P00924	ENO1	D6VV34; P00924; P99013; sce:YGR254W	Enolase 1 [OS=Saccharomyces cerevisiae S288C]	116.311	0	45	18	30	5	5	46.8	95.28	45	30	18	92	10	3.271	1.597	2.065	0.771	1.71	0.68	1.05	-0.38	0.181882	0.875069	0.58478	0.908475	0.518567	1	1	1	187.6	91.6	118.4	44.2	57.4	24.92	41.16	0.13	61.79	4.38	230.6	161.5	69.8
FALSE	High	IsMasterProtein	P09032	GCD1	D6W2W1; P09032; Q08721; sce:YOR260W	Translation initiation factor eIF-2B subunit gamma [OS=Saccharomyces cerevisiae S288C]	4.769	1	4	1	1	1	1	65.7	3.65	4	1	1	87	0
FALSE	High	IsMasterProtein	P12385	SUP45	D6VQD9; P12385; sce:YBR143C	Eukaryotic peptide chain release factor subunit 1 [OS=Saccharomyces cerevisiae S288C]	22.284	0	16	6	6	6	6	49	17.14	16	6	6	96	0	0.856	1.485	1.018	0.797	-0.22	0.57	0.03	-0.33	0.693907	0.0534299	0.999972	0.481482	1	0.335178	1	1	82.2	142.5	97.7	76.5	95.9	11.48	20.54	2.79	8.96	4.5	76.2	89.7	166
FALSE	High	IsMasterProtein	P20967	KGD1	D6VVG2; P20967; sce:YIL125W	2-oxoglutarate dehydrogenase, mitochondrial [OS=Saccharomyces cerevisiae S288C]	5.912	0	1	1	1	1	1	114.3	3.82	1	1	1	66	0	0.763	0.867	0.732	0.892	-0.39	-0.21	-0.45	-0.16	0.931314	0.995265	0.884878	1	1	1	1	1	81.3	92.2	77.9	94.9	106.4	9.99	10.19	8.95	50.08	29.86	72.3	83.3	94.7
FALSE	Medium	IsMasterProtein	P53128	MET13	D6VU23; O94090; P53128; Q92318; sce:YGL125W	Methylenetetrahydrofolate reductase 2 [OS=Saccharomyces cerevisiae S288C]	1.693	33	3	1	1	1	1	68.5	2.37	3	1	1	64	0	0.525	0.896	0.849	0.671	-0.93	-0.16	-0.24	-0.58	0.00898668	0.933405	0.755255	0.103208	0.0947312	1	1	0.397938	63.7	108.9	103.2	81.5	121.5	9.43	14.34	8.99	11.81	15.17	59.7	68.2	120.7
FALSE	High	IsMasterProtein	Q04773		D6VZP8; Q04773; sce:YMR074C	Uncharacterized protein YMR074C [OS=Saccharomyces cerevisiae S288C]	15.116	0	38	3	3	3	3	16	9.74	38	3	3	12	0	0.198	0.232	0.265	0.255	-2.34	-2.11	-1.91	-1.97	0.0191172	0.0308279	0.0470878	0.0418091	0.145468	0.244072	0.280331	0.221376	46.4	54.4	62.3	60	234.9	20.54	27.2	9.98	45.42	28.45	42.2	56.5	69.6
FALSE	High	IsMasterProtein	P14747	CMP2	D6VZB7; P14747; sce:YML057W	Serine/threonine-protein phosphatase 2B catalytic subunit A2 [OS=Saccharomyces cerevisiae S288C]	27.866	0	11	8	8	8	8	68.5	20.14	11	8	8	98	0	1.825	0.52	1.569	0.765	0.87	-0.94	0.65	-0.39	0.00327557	0.00211249	0.0143337	0.129126	0.0552424	0.0805374	0.161465	0.465802	166	47.3	142.7	69.6	91	9.31	12.27	9	9.06	3.83	191.8	168.1	46.9
FALSE	Medium	None	Q12046	CWC2	D6VRE5; Q12046; sce:YDL209C	Pre-mRNA-splicing factor CWC2 [OS=Saccharomyces cerevisiae S288C]	1.641	33	2	1	1	0	1	38.4	2.21	2	1	1	92	0	25.626	5.51	32.526	65.154	4.68	2.46	5.02	6.03									112.7	24.2	143	286.5	4.4	41.82	40.23	68.89	41.91		159.3	86.6	18.8
FALSE	Medium	IsMasterProtein	Q12291	BMT6	D6VY64; Q12291; sce:YLR063W	25S rRNA (uridine(2843)-N(3))-methyltransferase [OS=Saccharomyces cerevisiae S288C]	1.216	64	3	1	1	1	1	42	1.82	3	1	1	58	0	0.461	0.637	0.596	0.508	-1.12	-0.65	-0.75	-0.98	0.419257	0.829886	0.747912	0.535099	0.857163	1	1	1	59.6	82.3	77	65.6	129.1	5.76	20.13	28.52	14.73	36.11	58.5	63.5	97.2
FALSE	High	IsMasterProtein	P43682	SFT1	D6VXT0; P43682; sce:YKL006C-A	Protein transport protein SFT1 [OS=Saccharomyces cerevisiae S288C]	5.353	1	24	1	1	1	1	11	3.56	24	1	1	71	0
FALSE	High	IsMasterProtein	P53968	CRZ1	D6W1F1; P53968; sce:YNL027W	Transcriptional regulator CRZ1 [OS=Saccharomyces cerevisiae S288C]	40.315	0	14	10	11	10	10	76.3	27.96	14	11	10	133	0	2.139	0.636	1.701	1.122	1.1	-0.65	0.77	0.17	0.993834	0.999458	0.998838	0.87016	1	1	1	1	168.4	50	134	88.4	78.7	4.48	7.28	8.38	85.54	8.67	176.3	187.8	51.4
FALSE	High	IsMasterProtein	P32521	PAN1	D6VVT6; P32521; sce:YIR006C	Actin cytoskeleton-regulatory complex protein PAN1 [OS=Saccharomyces cerevisiae S288C]	77.866	0	12	16	21	16	16	160.2	57.59	12	21	16	108	0	1.25	0.535	1.484	0.818	0.32	-0.9	0.57	-0.29	0.978638	0.465661	0.821623	0.688004	1	1	1	1	126.5	54.2	150.3	82.9	101.2	0.69	5.03	3.55	48.82	15.6	131.9	130.6	54.3
FALSE	High	IsMasterProtein	P06785	CDC21	D6W2D7; P06785; Q12694; sce:YOR074C	Thymidylate synthase [OS=Saccharomyces cerevisiae S288C]	25.518	0	20	5	6	5	5	35	21.09	20	6	5	89	0	4.309	2.725	4.051	2.002	2.11	1.45	2.02	1	0.012604	0.0773829	0.0158632	0.134558	0.11037	0.40938	0.167218	0.477184	165	104.4	155.1	76.7	38.3	14.75	0.82	2.06	23.34	44.1	146.4	180.5	102.2
FALSE	High	IsMasterProtein	P53278		D6VUR2; P53278; sce:YGR130C	Uncharacterized protein YGR130C [OS=Saccharomyces cerevisiae S288C]	62.38	0	19	14	18	14	14	92.6	50.11	19	18	14	3	0	1.687	1.305	1.706	0.974	0.75	0.38	0.77	-0.04	0.0936256	0.587369	0.0859203	0.999722	0.355734	1	0.384376	1	132.4	102.4	133.9	76.4	78.5	1.39	23.97	1.35	18.56	18.47	131.1	133.7	86.3
FALSE	High	IsMasterProtein	Q08444	NOB1	D6W2B9; O00021; Q08444; sce:YOR056C	20S-pre-rRNA D-site endonuclease NOB1 [OS=Saccharomyces cerevisiae S288C]	4.638	1	7	1	1	1	1	51.7	3.66	7	1	1	81	0	0.4	0.273	0.29	0.327	-1.32	-1.87	-1.79	-1.61	0.0464927	0.00917785	0.0115656	0.0188988	0.250798	0.142381	0.146031	0.135796	74.1	50.6	53.7	60.5	185.2	9.18	13.25	0.05	27.05	14.95	74	84.2	59.2
FALSE	High	IsMasterProtein	Q12754	RRP12	D6W400; Q12754; Q7LH12; sce:YPL012W	Ribosomal RNA-processing protein 12 [OS=Saccharomyces cerevisiae S288C]	2.729	4	1	1	1	1	1	137.4	0	1	1	1	44	0
FALSE	Low	IsMasterProtein	P38827	SET1	D3DL69; P38827; sce:YHR119W	Histone-lysine N-methyltransferase, H3 lysine-4 specific [OS=Saccharomyces cerevisiae S288C]	0.915	90	1	1	1	1	1	123.8	0	1	1	1	240	0
FALSE	High	IsMasterProtein	Q03833	GIS1	D6VS81; Q03833; sce:YDR096W	Transcriptional activator/repressor GIS1 [OS=Saccharomyces cerevisiae S288C]	9.39	0	5	2	3	2	2	99.4	10.31	5	3	2	134	0	0.821	0.464	0.614	0.528	-0.28	-1.11	-0.7	-0.92	0.935832	0.0719645	0.33461	0.0652986	1	0.386517	0.898287	0.297005	119.3	67.4	89.2	76.8	145.4	9.13	18.91	27.03	28.69	10.54	114.3	130	78.8
FALSE	High	IsMasterProtein	P40017	YAT2	D3DLS3; P40017; sce:YER024W	Carnitine O-acetyltransferase YAT2 [OS=Saccharomyces cerevisiae S288C]	12.762	0	5	4	5	4	4	103.3	13.01	5	5	4	38	0	0.768	1.011	1.759	2.428	-0.38	0.02	0.81	1.28	0.990522	1	0.820247	0.408668	1	1	1	0.914378	45	59.2	103	142.2	58.5	15.65	34.51	78.05	9.35	12.17	36.4	45.5	68.7
FALSE	Medium	IsMasterProtein	Q02776	TIM50	D6W3V2; Q02776; sce:YPL063W	Mitochondrial import inner membrane translocase subunit TIM50 [OS=Saccharomyces cerevisiae S288C]	1.334	52	1	1	5	1	1	55.1	0	1	5	1	80	0
FALSE	Medium	IsMasterProtein	Q06639	RSC3	D6VST2; Q06639; sce:YDR303C	Chromatin structure-remodeling complex protein RSC3 [OS=Saccharomyces cerevisiae S288C]	1.518	44	1	1	1	1	1	101.7	1.87	1	1	1	105	0	2.414	0.962	1.891	1.356	1.27	-0.06	0.92	0.44	0.0558331	0.999969	0.183125	0.758326	0.275061	1	0.608123	1	160.7	64.1	125.9	90.3	66.6	29.5	6.23	9.3	10.77	42.13	212.5	139.1	65.6
FALSE	High	None	P04050	RPO21	D6VRK8; P04050; Q12364; Q92315; sce:YDL140C	DNA-directed RNA polymerase II subunit RPB1 [OS=Saccharomyces cerevisiae S288C]	6.636	0	1	1	2	0	1	191.5	5.02	1	2	1	96	0	5.633	9.208	6.958	6.783	2.49	3.2	2.8	2.76	0.202855	0.0806886	0.136686	0.0816751	0.56029	0.419142	0.504993	0.340507	106.5	174.1	131.6	128.2	18.9	5.1	9.48	0.39	64.9	64.17	97.2	90.4	163.8
FALSE	High	IsMasterProtein	P53094	MDS3	D6VTV6; P53094; sce:YGL197W	Negative regulator of sporulation MDS3 [OS=Saccharomyces cerevisiae S288C]	6.123	0	1	2	2	2	2	166.9	5.22	1	2	2	65	0	0.798	0.522	0.838	0.821	-0.33	-0.94	-0.26	-0.28	0.999046	0.907128	0.999705	0.984173	1	1	1	1	102.2	66.9	107.3	105.2	128.1	18.09	21.42	13.58	120.82	0.45	78.3	60.5	52.5
FALSE	High	IsMasterProtein	Q12363	WTM1	D6W2T4; O00041; Q12363; sce:YOR230W	Transcriptional modulator WTM1 [OS=Saccharomyces cerevisiae S288C]	2.958	4	3	1	1	1	1	48.4	2.1	3	1	1	169	0
FALSE	High	IsMasterProtein	P23201	SPA2	D6VXY3; P23201; sce:YLL021W	Protein SPA2 [OS=Saccharomyces cerevisiae S288C]	155.268	0	30	33	40	33	33	163	105.98	30	40	33	152	0	1.098	0.542	1.073	0.782	0.14	-0.88	0.1	-0.35	0.598961	0.000117442	0.809634	0.00754591	1	0.0253671	1	0.0932285	127.2	62.8	124.2	90.6	115.8	1.49	0.95	1.77	9.5	4.11	130.4	127.7	64.1
FALSE	High	IsMasterProtein	Q05029	BCH1	D6W063; Q05029; sce:YMR237W	Protein BCH1 [OS=Saccharomyces cerevisiae S288C]	11.54	0	6	3	3	3	3	82	9.09	6	3	3	75	0	1.386	0.774	2.605	1.309	0.47	-0.37	1.38	0.39	0.999325	0.99979	0.923648	0.952702	1	1	1	1	96.6	53.9	181.5	91.2	69.7	2.58	26.55	2.64	82.25	5.49	105.1	101.3	69.6
FALSE	High	IsMasterProtein	P38149	DUG2	D6VQS6; P38149; sce:YBR281C	Probable di- and tripeptidase DUG2 [OS=Saccharomyces cerevisiae S288C]	38.379	0	11	8	9	8	8	98	28.34	11	9	8	61	0	1.614	1.065	2.232	0.912	0.69	0.09	1.16	-0.13	0.927004	0.999994	0.645761	0.797321	1	1	1	1	124.3	82	171.9	70.3	77	4.98	11.15	5.59	64.12	12.7	127.5	136.8	94.3
FALSE	High	IsMasterProtein	P38236	MUM2	D6VQ56; P38236; sce:YBR057C	Protein MUM2 [OS=Saccharomyces cerevisiae S288C]	54.485	0	26	9	15	9	9	41.4	50.87	26	15	9	84	0	1.463	0.998	2.885	5.672	0.55	0	1.53	2.5	0.916318	1	0.194488	0.0438081	1	1	0.62892	0.229842	67.1	45.8	132.3	260.2	45.9	8.63	3.27	19.25	54.06	17.35	61.7	69.7	43.7
FALSE	Medium	IsMasterProtein	P24720	MNE1	D6W345; P24720; sce:YOR350C	Protein MNE1 [OS=Saccharomyces cerevisiae S288C]	1.92	17	1	1	1	1	1	77.2	0	1	1	1	43	0	2.279	0.234	1.561	1.67	1.19	-2.1	0.64	0.74	0.00947809		0.107151	0.065398	0.0975512		0.43351	0.297005	159.9	16.4	109.5	117.2	70.2	2.08		11.78	2.01	22.06	172.5	177.7	17.9
FALSE	Medium	None	P47161	VPS70	D6VWU5; P47161; sce:YJR126C	Vacuolar protein sorting-associated protein 70 [OS=Saccharomyces cerevisiae S288C]	1.879	20	1	1	1	0	0	92	1.79	1	1	1	29	0	0.843	0.522	0.926	0.833	-0.25	-0.94	-0.11	-0.26	0.950632	0.123199	0.998509	0.937307	1	0.548884	1	1	102.2	63.3	112.3	101.1	121.3	11.27	28.28	1.64	33.74	13.84	101.3	118.8	83.2
FALSE	High	IsMasterProtein	P25644	PAT1	D6VR80; P25644; Q8NKJ3; sce:YCR077C	DNA topoisomerase 2-associated protein PAT1 [OS=Saccharomyces cerevisiae S288C]	103.435	0	29	28	37	28	28	88.5	97.61	29	37	28	167	0	2.692	1.724	2.983	10.834	1.43	0.79	1.58	3.44	0.248843	0.748106	0.182889	0.00517553	0.628731	1	0.608123	0.0743335	77.8	49.8	86.2	313.1	28.9	5.79	4.93	17.86	56.85	17.75	73.6	67.8	46.8
FALSE	High	IsMasterProtein	P36015	YKT6	D6VX04; P36015; sce:YKL196C	Synaptobrevin homolog YKT6 [OS=Saccharomyces cerevisiae S288C]	11.765	0	18	3	3	3	3	22.7	8.1	18	3	3	104	0
FALSE	High	IsMasterProtein	P48837	NUP57	D6VUQ0; P48837; sce:YGR119C	Nucleoporin NUP57 [OS=Saccharomyces cerevisiae S288C]	9.67	0	4	2	2	2	2	57.5	3.73	4	2	2	67	0	0.225	0.061	0.304	0.737	-2.15	-4.04	-1.72	-0.44	0.068461	0.0025147	0.164005	0.54195	0.308477	0.082482	0.57821	1	49	13.2	66.1	160.2	217.4	14.41	0.87	10.31	52.74	46.99	44.7	54.8	13.5
FALSE	High	IsMasterProtein	P0CX56	RPS18B	D6VT75; P0CX56; P35271; sce:YDR450W; sce:YML026C	40S ribosomal protein S18-B [OS=Saccharomyces cerevisiae S288C]	14.216	0	24	4	4	4	4	17	11.17	24	4	4	100	0	0.441	1.479	0.691	0.93	-1.18	0.56	-0.53	-0.11	0.0993615	0.653655	0.700238	0.918047	0.364749	1	1	1	49.1	164.8	77	103.5	111.4	1.87	21.7	11.25	32.39	26.55	49.1	50.4	194.9
FALSE	High	IsMasterProtein	Q03063	DIG1	D6W3W5; Q03063; sce:YPL049C	Down-regulator of invasive growth 1 [OS=Saccharomyces cerevisiae S288C]	2.182	6	2	1	1	1	1	49.3	2.09	2	1	1	103	0
FALSE	Medium	IsMasterProtein	P40036	GIP2	D3DLV7; P40036; sce:YER054C	GLC7-interacting protein 2 [OS=Saccharomyces cerevisiae S288C]	1.422	49	2	1	1	1	1	62.3	0	2	1	1	64	0	3.901	4.202	4.273	3.131	1.96	2.07	2.1	1.65	0.780549	0.745308	0.737286	0.413022	1	1	1	0.914378	130.6	140.7	143.1	104.8	33.5	14.52	42.48	60.34	152.17	10.08	49	60.2	42.9
FALSE	High	IsMasterProtein	P14742	GFA1	D6VXI4; P14742; sce:YKL104C	Glutamine--fructose-6-phosphate aminotransferase [isomerizing] [OS=Saccharomyces cerevisiae S288C]	206.008	0	45	30	49	29	30	80	174.12	45	49	30	82	0	1.525	1.647	1.526	0.884	0.61	0.72	0.61	-0.18	0.164495	0.0876642	0.164053	0.999965	0.487127	0.441397	0.57821	1	118.6	128.1	118.6	68.7	77.8	3.59	0.15	9.25	28.47	6.04	120.9	114.9	127.4
FALSE	High	IsMasterProtein	P38205	NCL1	D6VPX6; P38205; sce:YBL024W	Multisite-specific tRNA:(cytosine-C(5))-methyltransferase [OS=Saccharomyces cerevisiae S288C]	7.082	0	3	1	1	1	1	77.8	4.75	3	1	1	103	0
FALSE	High	IsMasterProtein	P40462	TMA108	D6VVE9; P40462; sce:YIL137C	Protein TMA108 [OS=Saccharomyces cerevisiae S288C]	25.313	0	8	6	6	6	6	107.7	18.33	8	6	6	70	0	0.912	1.599	1.153	0.88	-0.13	0.68	0.21	-0.18	0.974798	0.0631716	0.871554	0.881257	1	0.366268	1	1	81.1	142.3	102.6	78.3	89	12.07	17.26	1.33	17.18	4.69	75.4	89.4	162.8
FALSE	High	IsMasterProtein	P32367	TFC1	D6VQC1; P32367; sce:YBR123C	Transcription factor tau 95 kDa subunit [OS=Saccharomyces cerevisiae S288C]	8.612	0	7	2	2	2	2	73.5	8.3	7	2	2	61	0	6.69	3.818	6.484	3.441	2.74	1.93	2.7	1.78	0.0029399	0.0173228	0.00321062	0.0252838	0.0552424	0.189396	0.0723333	0.159237	171.6	97.9	166.4	88.3	25.7	1.18	4.13	8.83	24.24	31.54	185.8	182.7	108.3
FALSE	Medium	IsMasterProtein	P40074	AVT6	D3DM25; P40074; sce:YER119C	Vacuolar amino acid transporter 6 [OS=Saccharomyces cerevisiae S288C]	1.5	45	1	1	1	1	1	48.8	2.01	1	1	1	90	0
FALSE	High	IsMasterProtein	P47166	SGM1	D6VWV2; P47166; sce:YJR134C	Protein SGM1 [OS=Saccharomyces cerevisiae S288C]	47.911	0	19	11	12	11	11	81.1	34.72	19	12	11	18	0	2.211	1.304	2.049	1.258	1.14	0.38	1.04	0.33	0.124422	0.898165	0.177853	0.550922	0.406999	1	0.597523	1	145.6	85.9	135	82.9	65.9	3	0.41	2.65	47.48	24.54	136.5	142.5	82.5
FALSE	High	IsMasterProtein	P40494	PRK1	D6VVJ2; P40494; Q02553; sce:YIL095W	Actin-regulating kinase PRK1 [OS=Saccharomyces cerevisiae S288C]	54.572	0	16	12	15	10	12	91	38.93	16	15	12	100	0	0.698	0.561	1.001	0.979	-0.52	-0.83	0	-0.03	0.135313	0.0160417	1	1	0.430676	0.182335	1	1	82.8	66.6	118.8	116.2	118.7	0.22	5.01	0.74	9	16.63	81.2	80.9	62.9
FALSE	High	IsMasterProtein	P38625	GUA1	D6W042; P38625; sce:YMR217W	GMP synthase [glutamine-hydrolyzing] [OS=Saccharomyces cerevisiae S288C]	82.854	0	35	19	26	19	19	58.4	68.8	35	26	19	96	0	1.796	0.944	1.209	1.274	0.84	-0.08	0.27	0.35	0.0298242	0.997578	0.742266	0.866869	0.191441	1	1	1	141.1	74.2	95	100.2	78.6	2.87	4.89	3.56	18.55	1.02	140.8	146.6	72.9
FALSE	High	IsMasterProtein	Q06151	DCS1	D6VYR7; Q06151; Q6Q5L1; sce:YLR270W	m7GpppX diphosphatase [OS=Saccharomyces cerevisiae S288C]	61.102	0	46	12	15	12	12	40.7	51.48	46	15	12	166	0	1.661	0.71	1.688	1.174	0.73	-0.49	0.76	0.23	0.300163	0.644658	0.275928	1	0.716558	1	0.796585	1	134.4	57.5	136.6	95	80.9	1.7	1.14	5.55	35.75	2.06	136.6	140	59.6
FALSE	Medium	IsMasterProtein	P47017	LSM1	D6VW62; P47017; sce:YJL124C	Sm-like protein LSm1 [OS=Saccharomyces cerevisiae S288C]	1.482	46	3	1	1	1	1	20.3	2.01	3	1	1	119	0	0.689	0.569	0.716	2.043	-0.54	-0.81	-0.48	1.03	0.193158	0.0406491	0.264598	0.013724	0.543967	0.287046	0.779547	0.112634	69.2	57.1	72	205.3	100.5	4.63	0.36	11.12	18.62	1.88	72.2	77.1	61.7
FALSE	High	IsMasterProtein	P46367	ALD4	D6W367; P46367; Q08898; sce:YOR374W	Potassium-activated aldehyde dehydrogenase, mitochondrial [OS=Saccharomyces cerevisiae S288C]	15.604	0	9	3	5	3	3	56.7	18.09	9	5	3	69	0	0.607	1.057	0.817	1.044	-0.72	0.08	-0.29	0.06	0.249522	0.999687	0.904887	1	0.628731	1	1	1	60.4	105.1	81.3	103.8	99.5	17.78	6.6	3.38	31.95	1.58	68.5	53.2	100.2
FALSE	High	IsMasterProtein	P34078	LTV1	D6VX53; P34078; sce:YKL143W	Protein LTV1 [OS=Saccharomyces cerevisiae S288C]	63.632	0	24	8	15	8	8	53.4	65.66	24	15	8	121	0	1.306	0.516	0.991	0.852	0.38	-0.95	-0.01	-0.23	0.920831	0.287464	1	0.601526	1	0.92699	1	1	144.7	57.2	109.8	94.4	110.8	7	5.46	5.83	41.78	10.5	143.3	158.3	61.9
FALSE	High	IsMasterProtein	P07248	ADR1	D6VSJ9; P07248; Q04919; sce:YDR216W	Regulatory protein ADR1 [OS=Saccharomyces cerevisiae S288C]	18.113	0	7	5	5	5	5	150.8	14.54	7	5	5	147	0	0.548	0.563	0.546	0.515	-0.87	-0.83	-0.87	-0.96	0.116275	0.138171	0.11281	0.10771	0.394197	0.581028	0.443993	0.407294	84.2	86.5	83.8	79.1	153.5	24.79	18.95	7.09	27.19	8.35	99.2	69.6	97.7
FALSE	High	IsMasterProtein	P38145	RIB5	D6VQQ3; P38145; sce:YBR256C	Riboflavin synthase [OS=Saccharomyces cerevisiae S288C]	4.383	1	6	1	1	1	1	26.2	4.73	6	1	1	33	0	0.718	0.709	0.779	0.668	-0.48	-0.5	-0.36	-0.58	0.539804	0.50669	0.7637	0.3026	0.978288	1	1	0.769429	84.7	83.6	91.8	78.8	117.9	28.39	2.99	4.73	15.03	28.74	69.5	104.4	85.9
FALSE	High	IsMasterProtein	P54787	VPS9	D6W0I8; P54787; sce:YML097C	Vacuolar protein sorting-associated protein 9 [OS=Saccharomyces cerevisiae S288C]	31.079	0	20	5	7	5	5	52.5	22.57	20	7	5	75	0	0.456	0.238	0.35	0.377	-1.13	-2.07	-1.52	-1.41	0.188557	0.0133028	0.0615376	0.0447492	0.533625	0.171592	0.332852	0.233713	90.7	47.3	69.5	75	198.9	22.41	19.06	3.55	19.22	19.03	77.5	106.7	54.3
FALSE	High	IsMasterProtein	P46682	APL6	D6VV40; P46682; sce:YGR261C	AP-3 complex subunit beta [OS=Saccharomyces cerevisiae S288C]	12.647	0	5	3	3	3	3	91.6	9.03	5	3	3	56	0	0.977	1.11	1.066	1.557	-0.03	0.15	0.09	0.64	0.999997	0.995458	0.999553	0.705426	1	1	1	1	84.4	96	92.2	134.5	86.4	9.94	10.09	3.94	31.88	21.51	79	91	103.6
FALSE	High	None	P0CH09	RPL40B	D6VVD9; P04838; P0CH09; P14796; P61864; Q6LA96; sce:YIL148W; sce:YKR094C	Ubiquitin-60S ribosomal protein L40 [OS=Saccharomyces cerevisiae S288C]	18.093	0	34	5	8	0	5	14.5	18	34	8	5	103	0	6.426	5.932	5.974	4.722	2.68	2.57	2.58	2.24	0.00540087	0.00693384	0.00678189	0.0219321	0.0699213	0.131487	0.115044	0.15	150.7	139.1	140.1	110.7	23.4	14.84	11.52	21.39	38.52	1.99	171.8	139.2	154.9
FALSE	High	IsMasterProtein	P38747	OTU2	D3DKQ0; P38747; sce:YHL013C	OTU domain-containing protein 2 [OS=Saccharomyces cerevisiae S288C]	4.935	1	5	1	1	1	1	36.1	3.18	5	1	1	24	0	11.816	8.098	6.466	1.64	3.56	3.02	2.69	0.71	0.0316738	0.0643404	0.100072	0.936887	0.196178	0.370987	0.417658	1	232.6	159.4	127.3	32.3	19.7	5.86	9.84	12.74	90.35	59.72	235.8	256.2	180.6
FALSE	High	IsMasterProtein	P29295	HRR25	D6W3G5; P29295; sce:YPL204W	Casein kinase I homolog HRR25 [OS=Saccharomyces cerevisiae S288C]	12.595	0	9	3	3	3	3	57.3	8.13	9	3	3	193	0	2.639	2.138	2.577	2.268	1.4	1.1	1.37	1.18	0.517415	0.720976	0.539652	0.970014	0.958887	1	1	1	123.4	100	120.5	106.1	46.8	5.2	13.23	8.37	64.54	23.95	123.3	132.7	113.9
FALSE	High	IsMasterProtein	P21524	RNR1	D3DLX5; P21524; sce:YER070W	Ribonucleoside-diphosphate reductase large chain 1 [OS=Saccharomyces cerevisiae S288C]	132.353	0	40	27	31	19	27	99.5	98.22	40	31	27	76	0	1.472	0.699	1.27	1.064	0.56	-0.52	0.34	0.09	0.148886	0.19175	0.524483	1	0.459867	0.714703	1	1	140	66.5	120.8	101.2	95.1	25.79	2.79	9.69	10.97	6.16	117.3	169.7	68.3
FALSE	High	IsMasterProtein	P31373	CYS3	D6VPK6; P31373; sce:YAL012W	Cystathionine gamma-lyase [OS=Saccharomyces cerevisiae S288C]	33.222	0	21	7	9	7	7	42.5	20.91	21	9	7	70	0	1.544	1.456	2.54	1.433	0.63	0.54	1.34	0.52	0.963861	0.980279	0.591839	0.999673	1	1	1	1	93.9	88.5	154.5	87.2	60.8	19.26	14.41	9.2	67.1	19.52	86	113.1	83.9
FALSE	High	IsMasterProtein	P40317	SOK1	D6VRZ4; P40317; sce:YDR006C	Protein SOK1 [OS=Saccharomyces cerevisiae S288C]	7.638	0	2	2	3	1	1	101	10.58	2	3	2	21	0	0.586	0.901	0.71	0.76	-0.77	-0.15	-0.49	-0.4	0.304045	0.996659	0.688717	0.879064	0.716558	1	1	1	65.1	100.1	78.9	84.4	111.1	16.33	0.27	3.21	36.23	23.58	57.3	72.2	99.1
FALSE	High	None	Q12141	TY1B-GR1	D6VUG1; Q12141; sce:YGR027W-B	Transposon Ty1-GR1 Gag-Pol polyprotein [OS=Saccharomyces cerevisiae S288C]	80.564	0	12	17	22	0	3	198.5	67.64	12	22	17	97	0	1.432	1.165	1.377	3.676	0.52	0.22	0.46	1.88	0.344628	0.926347	0.446201	0.000468234	0.767398	1	1	0.0173549	84.9	69.1	81.7	218	59.3	10.17	9.78	2.46	23.1	14.95	82.9	71.8	67.2
FALSE	Medium	IsMasterProtein	P17157	PHO85	D6W3Y2; P17157; Q03089; Q06888; sce:YPL031C	Cyclin-dependent protein kinase PHO85 [OS=Saccharomyces cerevisiae S288C]	1.941	17	3	1	1	0	1	34.9	0	3	1	1	206	0	1.229	1.535	1.481	1.438	0.3	0.62	0.57	0.52	0.979428	0.726709	0.784942	0.546907	1	1	1	1	97.5	121.8	117.5	114.1	79.4	2.37	4.69	0.2	58.28	10.63	91.8	88.8	109.1
FALSE	High	IsMasterProtein	Q3E792	RPS25A	A2TBN4; D6VUG0; P05758; P07282; Q3E792; Q45U56; sce:YGR027C	40S ribosomal protein S25-A [OS=Saccharomyces cerevisiae S288C]	5.224	1	15	2	2	0	2	12	4.36	15	2	2	46	0	50.902	100	50.883	50.372	5.67	6.64	5.67	5.65									102.8	279.1	102.7	101.7	2	4.23	44.24	26.96	116.7		66.5	70.6	257
FALSE	High	IsMasterProtein	P0CX85	RPL35B	D6VRG2; P0CX85; P39741; P39930; sce:YDL136W; sce:YDL191W	60S ribosomal protein L35-B [OS=Saccharomyces cerevisiae S288C]	2.495	5	8	1	1	1	1	13.9	2.47	8	1	1	72	0
FALSE	High	IsMasterProtein	P17891	CLC1	D6VUV0; P17891; sce:YGR167W	Clathrin light chain [OS=Saccharomyces cerevisiae S288C]	6.935	0	10	2	2	2	2	26.5	4.91	10	2	2	94	0	1.584	1.438	1.564	1.302	0.66	0.52	0.65	0.38	0.887103	0.952479	0.89762	0.526027	1	1	1	1	120.2	109.2	118.7	98.8	75.9	13.5	5.18	5.4	87	4.87	89.1	108	85.9
FALSE	Medium	IsMasterProtein	P54786	ZDS2	D6W0H5; P54786; sce:YML109W	Protein ZDS2 [OS=Saccharomyces cerevisiae S288C]	1.365	52	1	1	1	1	1	105.4	1.7	1	1	1	57	0
FALSE	High	IsMasterProtein	P33892	GCN1	D6VTV8; P33892; sce:YGL195W	eIF-2-alpha kinase activator GCN1 [OS=Saccharomyces cerevisiae S288C]	117.967	0	12	23	26	23	23	296.5	84.52	12	26	23	163	0	0.85	1.045	0.951	0.802	-0.23	0.06	-0.07	-0.32	0.9374	0.999825	0.999682	0.625066	1	1	1	1	89.3	109.9	100	84.3	105.1	2.67	21.3	1.55	27.72	8.38	92.2	88.8	129.6
FALSE	High	IsMasterProtein	Q92331	VPS5	D6W2D1; E9P8U6; Q08483; Q92331; sce:YOR069W	Vacuolar protein sorting-associated protein 5 [OS=Saccharomyces cerevisiae S288C]	40.836	0	20	9	11	9	9	76.4	29.73	20	11	9	61	0	3.131	1.051	1.832	0.963	1.65	0.07	0.87	-0.05	0.302106	0.999998	0.814087	0.90728	0.716558	1	1	1	210.6	70.7	123.2	64.8	67.3	11.32	12.94	5.49	97.07	13.64	198	168.6	67.2
FALSE	High	IsMasterProtein	P40024	ARB1	D3DLT5; P40024; sce:YER036C	ABC transporter ATP-binding protein ARB1 [OS=Saccharomyces cerevisiae S288C]	57.911	0	24	12	15	12	12	68.3	51.88	24	15	12	56	0	0.872	1.362	1.003	0.776	-0.2	0.45	0	-0.37	0.993664	0.839007	1	0.491552	1	1	1	1	86.8	135.5	99.9	77.3	99.5	9.15	20.5	0.75	38.73	15.49	96.1	84.4	162.7
FALSE	High	IsMasterProtein	Q12028	APL4	D6W439; Q12028; sce:YPR029C	AP-1 complex subunit gamma-1 [OS=Saccharomyces cerevisiae S288C]	4.182	3	3	2	2	2	2	93.6	4.59	3	2	2	83	0
FALSE	High	IsMasterProtein	P38788	SSZ1	D3DL13; P38788; Q6B1F3; Q6TQT7; Q6TQT8; sce:YHR064C	Ribosome-associated complex subunit SSZ1 [OS=Saccharomyces cerevisiae S288C]	5.588	0	4	1	1	1	1	58.2	3.7	4	1	1	95	0	0.524	0.912	0.829	0.715	-0.93	-0.13	-0.27	-0.48	0.159387	0.9979	0.953179	0.502978	0.479519	1	1	1	62.1	108	98.2	84.7	118.4	10.93	17.19	4.54	31.8	13.39	57.9	67.6	122.9
FALSE	High	IsMasterProtein	P07262	GDH1	D6W368; P07262; Q08899; sce:YOR375C	NADP-specific glutamate dehydrogenase 1 [OS=Saccharomyces cerevisiae S288C]	4.468	1	5	1	1	1	1	49.5	2.99	5	1	1	48	0	0.332	0.691	0.425	0.401	-1.59	-0.53	-1.23	-1.32	0.0354609	0.704287	0.0993776	0.0771517	0.213322	1	0.416733	0.329544	53.2	110.6	68.1	64.2	160.2	19.58	1.25	13.93	14.51	30.23	49.1	64.9	118.4
FALSE	High	IsMasterProtein	Q12464	RVB2	D6W3D5; Q12464; sce:YPL235W	RuvB-like protein 2 [OS=Saccharomyces cerevisiae S288C]	10.979	0	7	2	2	2	2	51.6	7.23	7	2	2	155	0	0.506	0.773	0.549	0.707	-0.98	-0.37	-0.87	-0.5	0.531782	0.980095	0.64148	0.964643	0.97451	1	1	1	64.9	99.2	70.4	90.6	128.3	29.21	3.77	16.38	62.47	35.35	50.1	76.2	96.9
FALSE	Medium	IsMasterProtein	P15731	UBC4	D6VQ81; P15731; sce:YBR082C	Ubiquitin-conjugating enzyme E2 4 [OS=Saccharomyces cerevisiae S288C]	1.848	20	4	1	1	1	1	16.4	2.15	4	1	1	115	0	0.391	1.896	0.429	0.631	-1.35	0.92	-1.22	-0.67	0.479619	0.786617	0.571613	0.998661	0.918471	1	1	1	46.6	225.8	51.1	75.1	119.1	30.8	46.95	24.32	85.33	0.43	51.7	33.2	283.4
FALSE	High	IsMasterProtein	Q07951	IRC25	D6VY23; Q07951; sce:YLR021W	Proteasome chaperone 3 [OS=Saccharomyces cerevisiae S288C]	9.691	0	18	1	1	1	1	20	6.58	18	1	1	59	0	0.343	0.237	0.457	0.439	-1.54	-2.08	-1.13	-1.19	0.139955	0.0443936	0.344584	0.304595	0.440571	0.296302	0.916497	0.76993	63.4	43.8	84.5	81.1	184.9	32.26	13.97	15.53	31.83	22.47	52.4	83.4	50.4
FALSE	High	IsMasterProtein	P32563	VPH1	D6W2X0; P32563; sce:YOR270C	V-type proton ATPase subunit a, vacuolar isoform [OS=Saccharomyces cerevisiae S288C]	14.576	0	4	3	4	3	3	95.5	14.82	4	4	3	122	0	0.489	1.18	0.653	0.965	-1.03	0.24	-0.62	-0.05	0.591438	0.998375	0.907413	0.999924	1	1	1	1	55	132.6	73.3	108.4	112.4	4.07	33.64	28.91	70.61	31.94	51.4	48.5	153.5
FALSE	High	IsMasterProtein	P53312	LSC2	D6VV24; P53312; sce:YGR244C	Succinate--CoA ligase [ADP-forming] subunit beta, mitochondrial [OS=Saccharomyces cerevisiae S288C]	5.048	1	5	1	2	1	1	46.9	9.24	5	2	1	103	0	0.73	0.655	0.66	0.857	-0.45	-0.61	-0.6	-0.22	0.243383	0.0856135	0.0916041	0.40842	0.62531	0.436819	0.395688	0.914378	80.8	72.5	73	94.8	110.6	6.47	11.54	6.11	17.5	4.54	78.4	86	80
FALSE	High	IsMasterProtein	P22147	XRN1	D6VTX9; P22147; sce:YGL173C	5'-3' exoribonuclease 1 [OS=Saccharomyces cerevisiae S288C]	334.159	0	39	62	94	60	60	175.4	289.1	39	94	62	232	1	2.064	1.063	1.923	6.624	1.05	0.09	0.94	2.73	0.214402	0.999895	0.289494	0.00265175	0.58073	1	0.819282	0.0467073	85.3	43.9	79.5	273.8	41.3	5.91	5.34	5.04	43.25	6.28	84.6	77.8	43.4
FALSE	High	None	P39692	MET10	D6VTR0; P39692; Q12683; sce:YFR030W	Sulfite reductase [NADPH] flavoprotein component [OS=Saccharomyces cerevisiae S288C]	1.993	11	1	1	1	0	1	114.8	2.25	1	1	1	52	0	1.315	0.9	0.941	0.889	0.39	-0.15	-0.09	-0.17	0.572112	0.980855	0.99836	0.970302	1	1	1	1	127.7	87.4	91.3	86.4	97.1	14.82	15.74	15.83	3	27.91	152.7	123.7	105.2
FALSE	High	IsMasterProtein	P54115	ALD6	D6W3V3; P54115; Q02782; sce:YPL061W	Magnesium-activated aldehyde dehydrogenase, cytosolic [OS=Saccharomyces cerevisiae S288C]	57.196	0	30	11	12	11	11	54.4	42.55	30	12	11	74	0	1.066	1.256	1.099	1.057	0.09	0.33	0.14	0.08	0.99992	0.969749	0.999465	0.985851	1	1	1	1	98.3	115.8	101.3	97.5	92.2	3.78	5.52	8.58	54.87	25.08	90.6	95.6	105.5
FALSE	High	IsMasterProtein	P26783	RPS5	D6VWU2; P26783; sce:YJR123W	40S ribosomal protein S5 [OS=Saccharomyces cerevisiae S288C]	7.376	0	7	1	2	1	1	25	9.53	7	2	1	93	0	0.353	1.125	0.617	0.568	-1.5	0.17	-0.7	-0.82	0.105342	0.998799	0.689123	0.827662	0.378815	1	1	1	41.9	133.3	73.1	67.2	118.5	25.19	9.25	5.19	57.58	6.82	33.6	48.2	137
FALSE	High	IsMasterProtein	P0C2H6	RPL27A	D3DKV5; P0C2H6; P38706; sce:YHR010W	60S ribosomal protein L27-A [OS=Saccharomyces cerevisiae S288C]	19.801	0	35	5	7	0	5	15.5	18.29	35	7	5	46	0	0.39	1.057	0.522	0.782	-1.36	0.08	-0.94	-0.35	0.20757	0.999981	0.515431	0.947707	0.565909	1	1	1	51.7	140.4	69.4	103.9	132.8	7.69	34.28	11.49	55.52	23.91	52.9	47.4	174.1
FALSE	High	IsMasterProtein	P39936	TIF4632	D6VU91; P39936; sce:YGL049C	Eukaryotic initiation factor 4F subunit p130 [OS=Saccharomyces cerevisiae S288C]	107.187	0	30	23	29	21	21	103.8	96.47	30	29	23	103	0	1.531	0.966	1.523	4.214	0.61	-0.05	0.61	2.08	0.263916	0.999937	0.273528	0.000899371	0.652127	1	0.793645	0.0224647	89.7	56.6	89.2	247	58.6	5.09	1.2	5.17	28.84	1.26	89.9	83.7	54.3
FALSE	High	IsMasterProtein	Q03825	MSS11	D6VZY6; Q03825; sce:YMR164C	Transcription activator MSS11 [OS=Saccharomyces cerevisiae S288C]	12.738	0	5	4	5	4	4	85	10.1	5	5	4	44	0	0.546	0.476	0.663	1.187	-0.87	-1.07	-0.59	0.25	0.000901367	0.000245689	0.00897189	0.247253	0.031384	0.0352564	0.127268	0.697588	77	67.1	93.5	167.4	141	0.9	8.53	8.31	3.67	1.92	73.5	72.5	59.9
FALSE	High	IsMasterProtein	P31539	HSP104	D6VXX8; P31539; sce:YLL026W	Heat shock protein 104 [OS=Saccharomyces cerevisiae S288C]	48.54	0	13	10	12	9	10	102	33.6	13	12	10	119	0	1.428	2.22	1.886	1.381	0.51	1.15	0.92	0.47	0.122255	0.00206529	0.00784367	0.0960696	0.406459	0.0805374	0.116542	0.385958	94.1	146.3	124.2	91	65.9	10.03	0.94	21.57	4.21	12.32	100.8	87.5	147
FALSE	High	IsMasterProtein	Q12018	CDC53	D6VRL7; Q12018; sce:YDL132W	Cell division control protein 53 [OS=Saccharomyces cerevisiae S288C]	8.712	0	3	2	2	2	2	93.9	6.98	3	2	2	156	0	3.555	3.62	3.369	2.408	1.83	1.86	1.75	1.27	0.0106871	0.00995886	0.013222	0.0572344	0.101483	0.14699	0.156496	0.270627	130.7	133.1	123.8	88.5	36.8	2.74	7.09	0.34	9.39	42.43	137.8	143.3	150.5
FALSE	High	IsMasterProtein	P32527	ZUO1	D6VV62; P32527; sce:YGR285C	Zuotin [OS=Saccharomyces cerevisiae S288C]	42.136	0	26	7	11	7	7	49	34.28	26	11	7	160	0	0.704	0.626	0.674	0.625	-0.51	-0.68	-0.57	-0.68	0.409236	0.186861	0.310022	0.101301	0.856085	0.71032	0.847739	0.397253	90.9	80.8	87	80.6	129.1	8	11.58	0.78	27.28	2.13	97.6	87.1	89
FALSE	High	IsMasterProtein	P32454	APE2	D6VX41; P32454; P36055; sce:YKL157W	Aminopeptidase 2, mitochondrial [OS=Saccharomyces cerevisiae S288C]	17.169	0	4	2	3	2	2	107.7	11.37	4	3	2	47	0	0.46	0.725	0.507	0.333	-1.12	-0.46	-0.98	-1.59	0.0708953	0.702374	0.120847	0.012816	0.315732	1	0.46752	0.108576	70.9	111.8	78.1	51.3	154.1	10.98	4.37	28.21	35.64	1.79	66.8	78	117.3
FALSE	High	IsMasterProtein	P53137	CUE3	D6VU37; P53137; sce:YGL110C	RQC trigger complex subunit CUE3 [OS=Saccharomyces cerevisiae S288C]	2.991	4	2	1	1	1	1	72	2.72	2	1	1	58	0
FALSE	High	IsMasterProtein	Q04322	GYL1	D6W016; Q04322; sce:YMR192W	Probable GTPase-activating protein GYL1 [OS=Saccharomyces cerevisiae S288C]	3.322	3	3	2	2	2	2	82.1	4.39	3	2	2	63	0	1.779	1.669	1.439	0.929	0.83	0.74	0.53	-0.11	0.334624	0.436915	0.726918	0.99987	0.752553	1	1	1	132	123.9	106.8	68.9	74.2	1.3	14.96	27.25	40.58	27.37	131.4	129	109.9
FALSE	High	IsMasterProtein	P38972	ADE6	D6VUJ6; P38972; sce:YGR061C	Phosphoribosylformylglycinamidine synthase [OS=Saccharomyces cerevisiae S288C]	7.463	0	2	2	2	2	2	148.8	3.59	2	2	2	90	0	0.308	0.505	0.433	0.435	-1.7	-0.98	-1.21	-1.2	0.113874	0.515089	0.333742	0.374639	0.390571	1	0.898055	0.864378	53.6	87.8	75.2	75.6	173.8	35.41	13.47	30.18	58.85	8.16	40.1	67	93.4
FALSE	Low	IsMasterProtein	Q12515	PAR32	D6VRH9; Q12515; Q6Q543; sce:YDL173W	Protein PAR32 [OS=Saccharomyces cerevisiae S288C]	1.079	74	3	1	1	1	1	31.9	0	3	1	1	5	0
FALSE	High	IsMasterProtein	P40564	DJP1	D6VVT4; P40564; Q6Q5N6; sce:YIR004W	DnaJ-like protein 1 [OS=Saccharomyces cerevisiae S288C]	22.167	0	12	3	6	3	3	48.5	18.64	12	6	3	64	0	0.322	0.52	0.269	0.199	-1.64	-0.94	-1.89	-2.33	0.321807	0.778013	0.212576	0.0316979	0.736566	1	0.661925	0.181199	61	98.6	51.1	37.7	189.8	21.37	12.47	2.98	66.94	15.8	55	74.5	94.7
FALSE	High	IsMasterProtein	P0CX44	RPL1B	D6VU14; P0CX44; P53030; sce:YGL135W; sce:YPL220W	60S ribosomal protein L1-B [OS=Saccharomyces cerevisiae S288C]	32.559	0	34	8	13	8	8	24.5	33.54	34	13	8	83	0	0.459	0.921	0.537	0.559	-1.12	-0.12	-0.9	-0.84	0.0059286	0.98743	0.0203479	0.0305085	0.0748567	1	0.19112	0.176152	61.3	123.2	71.8	74.7	133.7	4.51	0.47	9.41	24.89	4.53	59.7	63.6	124.2
FALSE	High	IsMasterProtein	P69771	DID2	D6VX98; P69771; sce:YKR035W-A	Vacuolar protein-sorting-associated protein 46 [OS=Saccharomyces cerevisiae S288C]	3.604	3	4	1	1	1	1	23.1	2.56	4	1	1	63	0	1.549	0.841	1.535	1.406	0.63	-0.25	0.62	0.49	0.915685	0.998435	0.921715	0.50029	1	1	1	1	126.3	68.6	125.2	114.7	81.6	17.2	3.06	12.62	86.3	29.09	113.3	88.8	53.3
FALSE	High	None	Q12491	TY2B-B	D6VPQ4; Q05679; Q12491; sce:YBL100W-B	Transposon Ty2-B Gag-Pol polyprotein [OS=Saccharomyces cerevisiae S288C]	20.37	0	4	5	6	0	4	202.1	18.01	4	6	5	97	0	3.074	1.441	3.574	3.589	1.62	0.53	1.84	1.84	0.0609375	0.833863	0.0340986	0.012633	0.28506	1	0.262948	0.108324	134.4	63	156.2	156.9	43.7	10.78	6.25	17.05	51.89	8.28	127.5	109.5	53
FALSE	High	None	P32266	MGM1	D6W2R7; P32266; Q02609; Q08627; sce:YOR211C	Dynamin-like GTPase MGM1, mitochondrial [OS=Saccharomyces cerevisiae S288C]	3.368	3	1	1	1	0	0	99.1	2.66	1	1	1	114	0
FALSE	High	IsMasterProtein	P52892	ALT2	D6VS97; P52892; Q66RF8; sce:YDR111C	Probable alanine aminotransferase [OS=Saccharomyces cerevisiae S288C]	4.776	1	4	2	2	2	2	56.7	5.17	4	2	2	45	0
FALSE	High	IsMasterProteinCandidate	Q08745	RPS10A	D6W2Z1; Q08745; sce:YOR293W	40S ribosomal protein S10-A [OS=Saccharomyces cerevisiae S288C]	17.259	0	57	5	5	0	5	12.7	17.06	57	5	5	127	0	0.379	1.149	0.484	1.037	-1.4	0.2	-1.05	0.05	0.417688	0.999592	0.671644	0.998563	0.857007	1	1	1	46.4	140.6	59.2	126.9	122.3	7.6	24.84	5.75	85.22	17.26	42.2	37.9	144.6
FALSE	High	None	Q12485	TY1A-GR2	D6VUH7; Q12485; sce:YGR038C-A	Transposon Ty1-GR2 Gag polyprotein [OS=Saccharomyces cerevisiae S288C]	66.609	0	38	12	17	0	2	49	53.8	38	17	12	21	0	0.823	0.794	0.464	3.415	-0.28	-0.33	-1.11	1.77	0.999906	0.999786	0.949347	0.999119	1	1	1	1	61	58.8	34.4	253.1	74.1	15.42	4.46	39.15	79.75	7.12	71.9	57.8	60.3
FALSE	High	IsMasterProtein	P53191	PIB2	D6VUB4; E9P8Z2; P53191; sce:YGL023C	Glutamine sensor PIB2 [OS=Saccharomyces cerevisiae S288C]	12.564	0	7	5	5	5	5	70.6	9.62	7	5	5	19	0	0.652	0.389	0.677	0.653	-0.62	-1.36	-0.56	-0.62	0.45873	0.0293696	0.542069	0.191777	0.905636	0.237615	1	0.600053	95.1	56.8	98.7	95.2	145.9	9.48	4.8	1.68	33.26	23.77	103.3	90.3	59.7
FALSE	High	IsMasterProtein	P53897	IGO1	D6W126; P53897; sce:YNL157W	mRNA stability protein IGO1 [OS=Saccharomyces cerevisiae S288C]	17.287	0	40	6	6	6	6	18	13.34	40	6	6	127	0	2.403	0.558	2.186	1.074	1.26	-0.84	1.13	0.1	0.00352753	0.0321137	0.00680851	0.982596	0.0552424	0.249098	0.115044	1	179.9	41.8	163.7	80.4	74.9	4.86	3.92	9.05	22.11	11.7	187.7	175.3	41
FALSE	High	IsMasterProtein	P35719	MRP8	D6VX54; P35719; sce:YKL142W	Uncharacterized protein MRP8 [OS=Saccharomyces cerevisiae S288C]	11.17	0	19	3	3	3	3	25.1	8.26	19	3	3	1	0	1.123	0.916	1.276	1.119	0.17	-0.13	0.35	0.16	0.998653	0.999654	0.962966	0.955034	1	1	1	1	108.7	88.8	123.6	108.4	96.9	12.86	12.15	9.61	57.65	13.09	92.5	111	75.9
FALSE	Low	IsMasterProtein	Q08347	BDS1	D6W1Q6; Q08347; sce:YOL164W	Alkyl/aryl-sulfatase BDS1 [OS=Saccharomyces cerevisiae S288C]	1.139	69	1	1	2	1	1	72.6	1.96	1	2	1	33	0	3.062	0.889	1.985	1.168	1.61	-0.17	0.99	0.22	0.0108419	0.988735	0.0939066	0.963656	0.10211	1	0.40111	1	196.6	57.1	127.5	75	64.2	23.36	14.86	5	8.42	38.31	249.2	178.6	68.1
FALSE	High	IsMasterProtein	Q06604	BSP1	D6W4H2; Q06604; sce:YPR171W	Protein BSP1 [OS=Saccharomyces cerevisiae S288C]	90.344	0	36	21	28	21	21	64.6	81.61	36	28	21	34	0	1.362	0.508	1.123	0.776	0.45	-0.98	0.17	-0.37	0.222502	0.00651722	0.914824	0.541204	0.591795	0.131487	1	1	146	54.5	120.5	83.3	107.2	15.72	15.7	2.7	11.23	10.05	162.8	130.2	48.6
FALSE	Medium	IsMasterProtein	Q04418	RBA50	D6VTE8; Q04418; sce:YDR527W	RNA polymerase II-associated protein RBA50 [OS=Saccharomyces cerevisiae S288C]	1.318	53	2	1	1	1	1	50.2	1.87	2	1	1	31	0	0.505	0.295	0.423	0.506	-0.98	-1.76	-1.24	-0.98	0.401405	0.057315	0.216229	0.291673	0.854168	0.350061	0.667867	0.75913	93.8	54.7	78.4	93.8	185.6	25.82	7.24	14.82	29.08	12.21	110.9	76.6	56.5
FALSE	Low	IsMasterProtein	P34072	MKS1	D6W1A3; P34072; Q02533; sce:YNL076W	Negative regulator of RAS-cAMP pathway [OS=Saccharomyces cerevisiae S288C]	1.129	70	1	1	1	1	1	65.6	0	1	1	1	63	0	2.184	0.653	1.74	1.299	1.13	-0.62	0.8	0.38	0.954039	0.996676	0.989087	0.797779	1	1	1	1	170.9	51.1	136.2	101.7	78.3	3.81	7.65	5.9	147.86	68.27	80.4	76.2	24.7
FALSE	High	IsMasterProtein	P38798	NMD2	D3DL27; P38798; sce:YHR077C	Nonsense-mediated mRNA decay protein 2 [OS=Saccharomyces cerevisiae S288C]	11.732	0	2	3	3	3	3	126.7	8.18	2	3	3	69	0	2.766	0.802	2.03	1.754	1.47	-0.32	1.02	0.81	0.0138919	0.881867	0.0789171	0.344917	0.114833	1	0.371743	0.824496	173.9	50.4	127.6	110.2	62.9	19.02	10.65	10.63	25.87	16.18	202.3	154.3	55.3
FALSE	High	IsMasterProtein	P39729	RBG1	D6VPI1; P39729; sce:YAL036C	Ribosome-interacting GTPase 1 [OS=Saccharomyces cerevisiae S288C]	12.239	0	14	5	5	5	5	40.7	9.15	14	5	5	76	0	1.754	2.177	1.796	1.57	0.81	1.12	0.84	0.65	0.319153	0.11231	0.286041	0.155562	0.735235	0.517801	0.811508	0.528819	108.8	135	111.4	97.4	62	1.16	14.83	4.54	39.99	20.75	102.9	101.2	114
FALSE	High	IsMasterProtein	P0CX46	RPL2B	D6VTR2; P05736; P0CX46; sce:YFR031C-A; sce:YIL018W	60S ribosomal protein L2-B [OS=Saccharomyces cerevisiae S288C]	48.838	0	46	11	16	11	11	27.4	49.35	46	16	11	53	0	0.447	1.534	0.603	1.209	-1.16	0.62	-0.73	0.27	0.299475	0.811037	0.698959	0.973231	0.716558	1	1	1	47.4	162.7	64	128.3	106.1	17.59	29.29	4.81	54.72	2.65	50	38.9	186.5
FALSE	Medium	None	P40505	SDS3	D6VVK2; P40505; sce:YIL084C	Transcriptional regulatory protein SDS3 [OS=Saccharomyces cerevisiae S288C]	1.565	37	2	1	1	0	1	37.6	2.16	2	1	1	154	0	0.633	0.881	1.024	0.665	-0.66	-0.18	0.03	-0.59	0.578483	0.995604	0.999999	0.670518	1	1	1	1	36.4	50.6	58.9	38.2	57.5	28.42	21.87	11.14	32.8	29.46	47.4	31.5	62.8
FALSE	High	IsMasterProtein	P22803	TRX2	D6VUZ2; P22803; sce:YGR209C	Thioredoxin-2 [OS=Saccharomyces cerevisiae S288C]	80.703	0	64	7	26	6	6	11.2	79.46	64	26	7	109	1	3.003	0.445	2.58	1.319	1.59	-1.17	1.37	0.4	0.556255	0.790785	0.681206	0.981684	1	1	1	1	191.7	28.4	164.7	84.2	63.8	2.61	0.31	5.43	71.06	7.3	208.6	201.1	30.4
FALSE	High	None	Q03856	TY1A-DR1	D6VS85; Q03856; sce:YDR098C-A	Transposon Ty1-DR1 Gag polyprotein [OS=Saccharomyces cerevisiae S288C]	66.609	0	38	12	17	0	2	49	53.8	38	17	12	21	0	0.823	0.794	0.464	3.415	-0.28	-0.33	-1.11	1.77	0.999906	0.999786	0.949347	0.999119	1	1	1	1	61	58.8	34.4	253.1	74.1	15.42	4.46	39.15	79.75	7.12	71.9	57.8	60.3
FALSE	High	IsMasterProtein	P40059	DOT6	D3DLZ5; P40059; sce:YER088C	Transcriptional regulatory protein DOT6 [OS=Saccharomyces cerevisiae S288C]	3.061	3	1	1	1	0	1	73	0	1	1	1	63	0
FALSE	High	IsMasterProtein	P47068	BBC1	D6VWG0; P47067; P47068; Q8X1F4; sce:YJL020C	Myosin tail region-interacting protein MTI1 [OS=Saccharomyces cerevisiae S288C]	174.258	0	34	34	49	34	34	128.2	141.77	34	49	34	46	0	2.852	0.893	3.291	1.377	1.51	-0.16	1.72	0.46	4.85895e-05	0.765135	2.08418e-05	0.0239056	0.00697867	1	0.0122036	0.156066	163.4	51.2	188.6	78.9	57.3	10.95	0.12	11.98	6.93	12.2	178.2	152.6	51.6
FALSE	High	IsMasterProtein	P32351	IMP2'	D6VVD3; P32351; sce:YIL154C	Sugar utilization regulatory protein IMP2 [OS=Saccharomyces cerevisiae S288C]	7.814	0	6	3	3	3	3	39	7.13	6	3	3	80	0	1.388	0.446	1.144	0.776	0.47	-1.17	0.19	-0.37	0.038779	0.000369388	0.558836	0.107761	0.219631	0.0353381	1	0.407294	154.9	49.8	127.7	86.6	111.6	3.29	8.75	2.51	15.11	2.62	171.6	163.8	57.3
FALSE	High	IsMasterProtein	P38187	UBP13	D6VPT4; P38187; sce:YBL067C	Ubiquitin carboxyl-terminal hydrolase 13 [OS=Saccharomyces cerevisiae S288C]	2.788	4	3	1	1	1	1	83.8	2.09	3	1	1	62	0
FALSE	High	IsMasterProtein	Q03177		D6VZS5; Q03138; Q03177; Q04435; sce:YMR102C	WD repeat-containing protein YMR102C [OS=Saccharomyces cerevisiae S288C]	6.688	0	2	2	2	2	2	94.2	5.53	2	2	2	1	0	1.647	0.517	1.218	1.335	0.72	-0.95	0.28	0.42	0.732179	0.500705	0.991551	0.515242	1	1	1	1	153.2	48.1	113.3	124.2	93	26.3	14.34	13.09	68.31	0.24	156.1	107.2	45
FALSE	High	IsMasterProtein	P25582	SPB1	D6VQW3; P25582; sce:YCL054W	27S pre-rRNA (guanosine(2922)-2'-O)-methyltransferase [OS=Saccharomyces cerevisiae S288C]	4.574	1	2	1	1	1	1	96.4	2.78	2	1	1	79	0
FALSE	High	IsMasterProtein	P07280	RPS19A	D6W1U7; P07280; sce:YOL121C	40S ribosomal protein S19-A [OS=Saccharomyces cerevisiae S288C]	6.509	0	12	1	1	0	1	15.9	4.45	12	1	1	88	0	0.459	1.049	0.758	0.805	-1.12	0.07	-0.4	-0.31	0.522424	0.999996	0.983698	0.999972	0.961964	1	1	1	50.3	115	83	88.3	109.6	26.73	0.94	5.27	81.49	18.59	36.9	54.1	102.9
FALSE	High	IsMasterProtein	Q03195	RLI1	D6VS78; Q03195; sce:YDR091C	Translation initiation factor RLI1 [OS=Saccharomyces cerevisiae S288C]	56.955	0	25	15	16	15	15	68.3	45.83	25	16	15	135	0	0.734	1.265	0.801	0.934	-0.45	0.34	-0.32	-0.1	0.350179	0.594941	0.642983	0.966709	0.775252	1	1	1	78.3	134.9	85.4	99.6	106.6	6.91	21.13	5.28	12.04	22.4	82.3	74.6	157
FALSE	High	IsMasterProtein	P40047	ALD5	D3DLX8; P40047; sce:YER073W	Aldehyde dehydrogenase 5, mitochondrial [OS=Saccharomyces cerevisiae S288C]	29.189	0	18	7	8	7	7	56.7	22.92	18	8	7	51	0	0.623	0.88	0.606	0.885	-0.68	-0.18	-0.72	-0.18	0.0885964	0.935561	0.0700156	0.795055	0.355734	1	0.353943	1	67.3	95	65.5	95.6	108	25.73	13.4	6.61	15.4	1.12	56.4	81.5	105.4
FALSE	High	IsMasterProtein	P20447	DBP3	D6VU66; P20447; sce:YGL078C	ATP-dependent RNA helicase DBP3 [OS=Saccharomyces cerevisiae S288C]	13.032	0	4	2	4	1	1	58.8	9.33	4	4	2	90	0	0.133	0.227	0.191	0.199	-2.91	-2.14	-2.39	-2.33	0.0014153	0.00718348	0.00409508	0.0046226	0.0353517	0.131487	0.0840223	0.0689788	35.9	61.1	51.6	53.5	269.4	2.6	4.15	6.72	40.26	36.71	38.7	37.3	66.7
FALSE	High	IsMasterProtein	P47143	ADO1	D6VWS4; P47143; sce:YJR105W	Adenosine kinase [OS=Saccharomyces cerevisiae S288C]	4.535	1	4	1	1	1	1	36.4	3.08	4	1	1	108	0	0.804	0.75	0.965	0.694	-0.31	-0.42	-0.05	-0.53	0.93032	0.819192	0.999983	0.290601	1	1	1	0.75913	88.4	82.4	106	76.2	109.9	19.34	12.05	1.26	34.76	17.87	79.5	104.6	92.6
FALSE	High	IsMasterProtein	P06780	RHO1	D6W4G6; P06780; sce:YPR165W	GTP-binding protein RHO1 [OS=Saccharomyces cerevisiae S288C]	4.907	1	7	2	2	2	2	23.1	3.01	7	2	2	271	0	1.128	2.035	1.41	1.638	0.17	1.02	0.5	0.71	0.998673	0.352533	0.886444	0.358534	1	1	1	0.839012	77.3	139.5	96.7	112.3	68.6	29.35	33.2	0.95	49.38	25.08	87.8	57.6	162.9
FALSE	High	IsMasterProtein	P25339	PUF4	D6VUC3; P25339; sce:YGL014W	Pumilio homology domain family member 4 [OS=Saccharomyces cerevisiae S288C]	105.513	0	24	19	33	19	19	97.7	98.65	24	33	19	98	0	1.334	0.811	1.892	6.131	0.42	-0.3	0.92	2.62	0.964163	0.990828	0.566683	0.0257773	1	1	1	0.159237	62.1	37.7	88	285.3	46.5	8.23	1.14	27.42	51.64	1.28	57.1	64.2	36.5
FALSE	High	IsMasterProtein	Q06146		D6VYQ4; Q06146; sce:YLR257W	Uncharacterized protein YLR257W [OS=Saccharomyces cerevisiae S288C]	37.88	0	28	8	10	8	8	36	28.83	28	10	8	0	0	3.073	0.315	2.443	1.215	1.62	-1.67	1.29	0.28	0.0003786	0.000313544	0.00159216	0.766906	0.0217506	0.0353381	0.055436	1	213.6	21.9	169.8	84.5	69.5	8.05	10.65	7.22	11.71	10.06	230.2	205.4	20.7
FALSE	High	IsMasterProtein	P40010	NUG1	D3DLQ2; P40010; sce:YER006W	Nuclear GTP-binding protein NUG1 [OS=Saccharomyces cerevisiae S288C]	20.962	0	8	3	4	3	3	57.7	13.85	8	4	3	97	0	0.523	0.394	0.497	0.541	-0.94	-1.34	-1.01	-0.89	0.496023	0.200633	0.429329	0.912528	0.942034	0.740599	1	1	91.1	68.6	86.6	94.3	174.3	9.13	7.94	2.17	67.31	24.08	76.2	86.7	64.8
FALSE	Medium	IsMasterProtein	P47155	ILM1	D6VWT7; P47155; sce:YJR118C	Protein ILM1 [OS=Saccharomyces cerevisiae S288C]	1.268	62	10	1	1	1	1	23.6	2.03	10	1	1	26	0	0.24	0.354	0.298	0.28	-2.06	-1.5	-1.75	-1.83	0.03163	0.125989	0.0677504	0.0257617	0.196178	0.552042	0.352241	0.159237	52.4	77.5	65.2	61.3	218.7	11.94	0.61	15.99	50.39	27.34	49	58.1	79.2
FALSE	High	IsMasterProtein	P14120	RPL30	D6VUA8; P14120; sce:YGL030W	60S ribosomal protein L30 [OS=Saccharomyces cerevisiae S288C]	18.556	0	48	4	12	4	4	11.4	31.38	48	12	4	96	0	0.28	0.722	0.364	0.335	-1.84	-0.47	-1.46	-1.58	0.129742	0.964437	0.275826	0.10748	0.416406	1	0.796585	0.407294	49.9	128.9	65	59.8	178.6	10.95	21.06	1.39	61.74	39.66	46.8	54.7	151.7
FALSE	High	IsMasterProtein	P32874	HFA1	D6W032; O42823; P32874; sce:YMR207C	Acetyl-CoA carboxylase, mitochondrial [OS=Saccharomyces cerevisiae S288C]	223.482	0	21	43	75	35	35	259	206.61	21	75	43	116	0	0.698	1.821	0.815	0.664	-0.52	0.86	-0.3	-0.59	0.975935	0.838173	0.998067	0.999822	1	1	1	1	69.9	182.2	81.5	66.4	100.1	6.52	7.78	5.03	100.73	7.14	56.5	62	146.1
FALSE	High	IsMasterProtein	P53739	FPK1	D6W1M2; P53739; sce:YNR047W	Flippase kinase 1 [OS=Saccharomyces cerevisiae S288C]	2.604	5	1	1	1	1	1	100.5	0	1	1	1	142	0
FALSE	High	IsMasterProtein	Q03280	TOM1	D6VT81; Q03280; Q7LIK7; sce:YDR457W	E3 ubiquitin-protein ligase TOM1 [OS=Saccharomyces cerevisiae S288C]	3.305	3	1	1	1	1	1	373.9	3.69	1	1	1	108	0
FALSE	Medium	None	P0C5Q7		P0C5Q7	Putative uncharacterized protein YNR001W-A [OS=Saccharomyces cerevisiae S288C]	1.274	61	8	1	1	0	0	8.3	0	8	1	1	0	0	1.102	0.363	1.423	1.992	0.14	-1.46	0.51	0.99	0.999888	0.325117	0.958638	0.651139	1	0.993408	1	1	88.1	29	113.8	159.2	80	37.13	27.23	10	40.69	10.66	117.7	68.7	24.4
FALSE	High	IsMasterProtein	P34227	PRX1	D6VPT6; P34227; sce:YBL064C	Peroxiredoxin PRX1, mitochondrial [OS=Saccharomyces cerevisiae S288C]	6.468	0	8	2	2	2	2	29.5	5.14	8	2	2	56	0	1.104	1.437	1.04	0.837	0.14	0.52	0.06	-0.26	0.966226	0.189973	0.999496	0.748516	1	0.712709	1	1	98	127.6	92.3	74.3	88.8	3.41	2.11	3.09	11.5	28.28	103.2	108.3	135.6
FALSE	High	IsMasterProteinCandidate	P53221	RPL26B	D6VUH0; P53221; Q06HN2; Q45U50; sce:YGR034W	60S ribosomal protein L26-B [OS=Saccharomyces cerevisiae S288C]	8.049	0	27	4	4	0	4	14.2	3.79	27	4	4	57	0	0.584	2.204	0.739	1.148	-0.77	1.14	-0.44	0.2	0.89055	0.660019	0.988844	0.964959	1	1	1	1	52.1	196.6	65.9	102.4	89.2	18.03	30.38	2.16	92.47	5.64	50.7	39.2	209.1
FALSE	High	IsMasterProtein	P47018	MTC1	D6VW63; P47018; sce:YJL123C	Maintenance of telomere capping protein 1 [OS=Saccharomyces cerevisiae S288C]	91.198	0	32	14	21	14	14	53.4	58.41	32	21	14	16	0	1.112	0.627	0.764	0.433	0.15	-0.67	-0.39	-1.21	0.989814	0.235264	0.701407	0.00709426	1	0.821253	1	0.0913195	141.3	79.6	97.1	55	127.1	6.55	9.84	1.01	27.96	9.78	140.7	154.4	89
FALSE	High	IsMasterProtein	Q02821	SRP1	D6W0Z8; Q02821; sce:YNL189W	Importin subunit alpha [OS=Saccharomyces cerevisiae S288C]	17.599	0	12	5	5	5	5	60.4	10.04	12	5	5	70	0	2.925	2.398	2.945	1.905	1.55	1.26	1.56	0.93	0.176658	0.323459	0.172883	0.252722	0.510001	0.993408	0.591669	0.703109	142.5	116.8	143.5	92.8	48.7	5.92	1.96	20.47	73.75	4.63	134.7	123.8	107.4
FALSE	High	IsMasterProtein	P39104	PIK1	D6W0S7; P39104; sce:YNL267W	Phosphatidylinositol 4-kinase PIK1 [OS=Saccharomyces cerevisiae S288C]	5.515	1	2	1	1	1	1	119.8	4.68	2	1	1	140	0
FALSE	High	IsMasterProtein	P53063	RAI1	D6VV89; P53063; sce:YGL246C	Decapping nuclease RAI1 [OS=Saccharomyces cerevisiae S288C]	5.393	1	4	1	1	1	1	44.5	3.46	4	1	1	183	0	8.363	7.639	9.391	11.433	3.06	2.93	3.23	3.52	0.0864315	0.101838	0.0702341	0.049721	0.354344	0.491219	0.353943	0.247456	112	102.3	125.7	153.1	13.4	14.4	0.45	19.26	2.25	106.54	106.9	131.1	108.5
FALSE	High	IsMasterProtein	Q12514	NOT5	D6W476; Q12514; sce:YPR072W	General negative regulator of transcription subunit 5 [OS=Saccharomyces cerevisiae S288C]	66.798	0	38	19	22	18	18	65.8	57.68	38	22	19	151	0	3.15	0.989	2.277	2.65	1.66	-0.02	1.19	1.41	0.701901	1	0.890251	0.999511	1	1	1	1	152	47.7	109.9	127.9	48.3	0.06	4.29	5.39	78.13	4.1	159.6	159.7	48.6
FALSE	High	IsMasterProtein	P12962	CAF20	D6W2X6; P12962; sce:YOR276W	Cap-associated protein CAF20 [OS=Saccharomyces cerevisiae S288C]	4.371	1	9	1	1	1	1	18.2	3.2	9	1	1	98	0	1.171	0.954	1.151	0.994	0.23	-0.07	0.2	-0.01	0.992046	0.999976	0.995251	0.986668	1	1	1	1	112.8	91.9	110.9	95.8	96.4	16.42	16.16	20.03	51.73	15.94	94.3	119.1	77
FALSE	High	IsMasterProtein	Q04371		D6VZK1; Q04371; sce:YMR027W	Damage-control phosphatase YMR027W [OS=Saccharomyces cerevisiae S288C]	3.247	3	3	1	1	1	1	54.1	2.04	3	1	1	24	0	1.706	3.616	2.492	1.574	0.77	1.85	1.32	0.65	0.647065	0.0530372	0.199519	0.745419	1	0.335178	0.638036	1	86.8	184.1	126.9	80.1	50.9	22.41	25.38	16.11	48.21	0.76	73.4	101.1	152.3
FALSE	High	IsMasterProtein	Q05785	ENT2	D6VYK7; Q05785; sce:YLR206W	Epsin-2 [OS=Saccharomyces cerevisiae S288C]	169.27	0	38	26	41	23	23	71.8	145.71	38	41	26	59	2	1.969	0.568	2.696	2.737	0.98	-0.82	1.43	1.45	0.661248	0.790929	0.328107	0.680928	1	1	0.884964	1	120.4	34.7	164.8	167.3	61.1	4.79	2.62	17.26	59.19	5.41	127.4	119	36.2
FALSE	High	IsMasterProtein	P36102	PAN3	D6VXQ9; P36102; sce:YKL025C	PAN2-PAN3 deadenylation complex subunit PAN3 [OS=Saccharomyces cerevisiae S288C]	33.696	0	13	9	11	9	9	76.4	28.19	13	11	9	151	0	1.597	2.643	2.91	4.941	0.67	1.4	1.54	2.3	0.91081	0.408294	0.326975	0.186441	1	1	0.883986	0.593409	61	101.1	111.3	188.9	38.2	4.48	8.48	2.37	61.51	27.97	60	63.9	96.5
FALSE	High	IsMasterProtein	P25040	TSR4	D6W243; P25040; sce:YOL022C	20S rRNA accumulation protein 4 [OS=Saccharomyces cerevisiae S288C]	26.835	0	10	3	5	3	3	46	19.84	10	5	3	36	0	0.832	0.531	0.779	0.588	-0.27	-0.91	-0.36	-0.77	0.79787	0.0263793	0.565605	0.0261641	1	0.22942	1	0.160762	105.5	67.3	98.8	74.6	126.8	8.54	0.53	11.47	19.83	14.58	101.6	114.7	69.1
FALSE	High	IsMasterProtein	P34756	FAB1	D6VTQ0; P34756; sce:YFR019W	1-phosphatidylinositol 3-phosphate 5-kinase FAB1 [OS=Saccharomyces cerevisiae S288C]	33.027	0	6	12	13	12	12	257.3	24.84	6	13	12	111	0	1.424	1.081	1.645	1.343	0.51	0.11	0.72	0.43	0.968716	0.999973	0.885889	0.510775	1	1	1	1	113.7	86.4	131.4	107.3	79.9	16.13	0.94	21.23	91.46	14.62	99	78.8	67.5
FALSE	High	IsMasterProtein	P32471	EFB1	D6VPL3; P32471; sce:YAL003W	Elongation factor 1-beta [OS=Saccharomyces cerevisiae S288C]	31.526	0	30	5	11	5	5	22.6	30.6	30	11	5	92	0	0.972	0.404	0.7	0.499	-0.04	-1.31	-0.51	-1	0.999995	0.0501331	0.681112	0.237166	1	0.32333	1	0.676188	131.4	54.7	94.8	67.4	135.3	7.96	7.66	4	30.38	44.88	122.2	136.7	50.9
FALSE	High	IsMasterProtein	P38682	GLO3	D3DM28; P38682; sce:YER122C	ADP-ribosylation factor GTPase-activating protein GLO3 [OS=Saccharomyces cerevisiae S288C]	87.442	0	39	14	19	14	14	55.1	59.83	39	19	14	82	0	6.006	1.591	5.46	1.659	2.59	0.67	2.45	0.73	0.124644	0.960974	0.152114	0.999983	0.406999	1	0.546184	1	213.4	56.5	194	58.9	35.5	0.39	8.01	17.34	72.5	8.89	223.8	222.6	62.6
FALSE	High	IsMasterProtein	P38910	HSP10	D6W286; E9P935; P38910; sce:YOR020C	10 kDa heat shock protein, mitochondrial [OS=Saccharomyces cerevisiae S288C]	18.071	0	44	5	7	5	5	11.4	19.9	44	7	5	83	0	8.053	2.772	4.912	3.626	3.01	1.47	2.3	1.86	0.599398	0.957857	0.799626	0.999994	1	1	1	1	213.9	73.7	130.5	96.3	26.6	18.68	16.91	11.06	89.16	33.36	251.9	193.1	85.6
FALSE	High	IsMasterProtein	P50896	PSP1	D6VTC7; P50896; sce:YDR505C	Protein PSP1 [OS=Saccharomyces cerevisiae S288C]	167.117	0	36	25	38	22	22	95.3	134.5	36	38	25	13	3	1.844	0.938	2.218	4.185	0.88	-0.09	1.15	2.07	0.207845	0.999668	0.0786705	0.00534567	0.565909	1	0.371743	0.0755918	96.2	48.9	115.8	218.4	52.2	5.17	4.86	22.43	34.59	6.87	97.2	90.4	46
FALSE	High	IsMasterProtein	P32769	HBS1	D6VXE4; P32769; sce:YKR084C	Elongation factor 1 alpha-like protein [OS=Saccharomyces cerevisiae S288C]	84.291	0	33	18	23	17	18	68.7	68.15	33	23	18	129	0	2.582	0.904	2.25	1.131	1.37	-0.15	1.17	0.18	0.0047883	0.984485	0.0115422	0.999856	0.0670947	1	0.146031	1	175.7	61.5	153.1	77	68.1	8.32	15.98	2.22	22.29	11.11	191.7	170.4	56.5
FALSE	High	IsMasterProtein	Q12250	RPN5	D6VRK1; Q12250; sce:YDL147W	26S proteasome regulatory subunit RPN5 [OS=Saccharomyces cerevisiae S288C]	38.38	0	24	10	11	10	10	51.7	34.09	24	11	10	60	0	3.024	0.548	2.361	1.088	1.6	-0.87	1.24	0.12	0.64637	0.94861	0.821595	0.915468	1	1	1	1	194.3	35.2	151.7	69.9	64.3	2.62	30.53	3.29	74.14	4.55	211.6	203.9	46.9
FALSE	Low	IsMasterProtein	P14737	RAD9	D6VSK0; P14737; Q04920; sce:YDR217C	DNA repair protein RAD9 [OS=Saccharomyces cerevisiae S288C]	1.024	77	1	1	1	1	1	148.3	0	1	1	1	132	0
FALSE	High	IsMasterProtein	P40856	SAP185	D6VW86; P40856; sce:YJL098W	SIT4-associating protein SAP185 [OS=Saccharomyces cerevisiae S288C]	24.141	0	9	6	6	6	6	121.3	20.42	9	6	6	54	0	0.908	0.703	0.882	0.769	-0.14	-0.51	-0.18	-0.38	0.99995	0.977807	0.999813	0.663687	1	1	1	1	108.4	83.9	105.2	91.8	119.3	17.03	25.41	0.55	63.09	24.79	100.3	127.8	73.1
FALSE	High	IsMasterProteinCandidate	P0C0W1	RPS22A	D6VW01; P04648; P0C0W1; sce:YJL190C	40S ribosomal protein S22-A [OS=Saccharomyces cerevisiae S288C]	26.927	0	35	5	7	0	5	14.6	22.84	35	7	5	46	0	0.867	2.762	0.857	0.687	-0.21	1.47	-0.22	-0.54	0.997055	0.115761	0.995766	0.595018	1	0.528382	1	1	74.6	237.9	73.8	59.2	86.1	11.3	36.62	18.41	44.59	12.46	82.6	70.4	316.7
FALSE	High	IsMasterProtein	Q07825	FRA1	D6VXX5; Q07825; sce:YLL029W	Putative Xaa-Pro aminopeptidase FRA1 [OS=Saccharomyces cerevisiae S288C]	16.661	0	9	7	7	7	7	84.9	12.21	9	7	7	78	0	1.581	1.844	1.682	1.481	0.66	0.88	0.75	0.57	0.019098	0.00382648	0.00965243	0.020016	0.145468	0.107141	0.132032	0.141094	105.2	122.8	112	98.6	66.6	5.15	2.85	3.54	8.28	17.48	108.5	100.9	124.5
FALSE	High	IsMasterProtein	P28496	LAC1	D6VXS8; P28496; sce:YKL008C	Ceramide synthase LAC1 [OS=Saccharomyces cerevisiae S288C]	3.206	3	4	1	1	1	1	49	2.9	4	1	1	55	0	1.079	2.175	1.095	1.292	0.11	1.12	0.13	0.37	0.999721	0.18171	0.999326	0.950331	1	0.70001	1	1	81.7	164.7	82.9	97.8	75.7	15.13	22.38	21.55	31.01	30.47	72.6	90	191.2
FALSE	High	IsMasterProtein	Q99207	NOP14	D6VRK0; Q99207; sce:YDL148C	Nucleolar complex protein 14 [OS=Saccharomyces cerevisiae S288C]	6.682	0	3	2	2	2	2	94.2	5.06	3	2	2	88	0	0.226	0.193	0.206	0.196	-2.14	-2.38	-2.28	-2.35	0.308004	0.23034	0.260453	0.518824	0.719302	0.811137	0.769307	1	63.3	53.9	57.6	55	279.8	1.98	13.63	14.22	115.7	21.53	53.3	51.8	49.3
FALSE	High	IsMasterProtein	P43535	GCN20	D6VTN9; P43535; sce:YFR009W	Protein GCN20 [OS=Saccharomyces cerevisiae S288C]	100.128	0	26	16	23	16	16	85	78.57	26	23	16	123	0	2.081	0.852	1.793	0.963	1.06	-0.23	0.84	-0.05	0.0131341	0.874912	0.0413457	0.961325	0.111842	1	0.276497	1	161.6	66.2	139.2	74.8	77.7	0.33	1.03	7.79	25.35	4.05	165.7	166.4	68.5
FALSE	High	IsMasterProtein	P39516	RPS14B	D6VW00; P39516; sce:YJL191W	40S ribosomal protein S14-B [OS=Saccharomyces cerevisiae S288C]	23.857	0	43	6	6	1	6	14.6	14.45	43	6	6	94	0	0.298	1.093	0.384	0.725	-1.75	0.13	-1.38	-0.46	0.0565316	0.999708	0.145913	0.670921	0.275061	1	0.532036	1	41.7	153.2	53.8	101.7	140.2	5.61	36.94	5.26	47.8	11.2	43.3	40	199.9
FALSE	High	IsMasterProtein	P06103	PRT1	D6W356; P06103; sce:YOR361C	Eukaryotic translation initiation factor 3 subunit B [OS=Saccharomyces cerevisiae S288C]	31.83	0	16	8	10	8	8	88.1	30.16	16	10	8	89	0	1.465	1.211	1.653	0.805	0.55	0.28	0.73	-0.31	0.161384	0.716828	0.0536758	0.711716	0.480648	1	0.309917	1	119.5	98.8	134.9	65.7	81.6	5.99	5.5	21.95	18.87	4.34	116.3	126.6	104.3
FALSE	High	IsMasterProtein	Q03308	VPS16	D6W3W9; Q03078; Q03308; sce:YPL045W	Vacuolar protein sorting-associated protein 16 [OS=Saccharomyces cerevisiae S288C]	5.55	1	2	1	1	1	1	92.7	3.5	2	1	1	94	0
FALSE	High	None	Q04952	FKS3	D6W0D3; Q04952; sce:YMR306W	1,3-beta-glucan synthase component FKS3 [OS=Saccharomyces cerevisiae S288C]	7.885	0	1	3	3	0	0	207.3	3.55	1	3	3	106	0	16.639	29.454	19.918	13.021	4.06	4.88	4.32	3.7	0.0768772	0.0355332	0.0599659	0.108545	0.33459	0.268369	0.32976	0.40891	116.8	206.8	139.8	91.4	7	4.47	3.29	6.16	37.02	101.34	125.1	117.4	219.6
FALSE	High	IsMasterProtein	P0CX63	TY2B-F	D6VTM7; P0CX63; Q05369; Q12503; sce:YFL002W-A; sce:YGR161W-B	Transposon Ty2-F Gag-Pol polyprotein [OS=Saccharomyces cerevisiae S288C]	23.005	0	5	6	7	0	5	201.9	20.97	5	7	6	97	0	2.392	1.145	2.81	3.232	1.26	0.2	1.49	1.69	0.0956673	0.994179	0.0460419	0.0123355	0.355734	1	0.276497	0.107375	123.9	59.3	145.6	167.4	51.8	10.35	8.48	17.49	46.9	2.08	120.5	104.1	50.5
FALSE	High	IsMasterProtein	Q06315	SKG3	D6VYJ0; Q06315; sce:YLR187W	Protein SKG3 [OS=Saccharomyces cerevisiae S288C]	42.763	0	10	9	10	9	9	114	30.89	10	10	9	38	0	1.396	0.76	1.465	1.231	0.48	-0.4	0.55	0.3	0.107997	0.214918	0.0619933	0.234685	0.38125	0.779546	0.332852	0.675776	124.6	67.8	130.7	109.9	89.3	24.95	1.8	4.16	7.71	2.27	146	102.2	65.6
FALSE	High	IsMasterProtein	Q07834		D6VXX3; Q07834; sce:YLL032C	KH domain-containing protein YLL032C,may interact with ribosomes [OS=Saccharomyces cerevisiae S288C]	11.437	0	5	3	4	3	3	94.5	11.81	5	4	3	12	0	1.102	1.35	0.912	0.908	0.14	0.43	-0.13	-0.14	0.99997	0.993269	0.999977	0.986457	1	1	1	1	103.3	126.6	85.5	85.1	93.7	31.38	27.39	48.78	100.57	15.45	105.9	67.4	125.9
FALSE	High	IsMasterProtein	Q12122	LYS21	D6VRL8; E9P8Z7; Q12122; sce:YDL131W	Homocitrate synthase, mitochondrial [OS=Saccharomyces cerevisiae S288C]	25.133	0	15	5	6	0	5	48.6	18.03	15	6	5	49	0	0.577	0.459	0.461	0.824	-0.79	-1.12	-1.12	-0.28	0.128806	0.0284722	0.0294695	0.660031	0.415724	0.236855	0.244751	1	83.9	66.7	67.1	119.9	145.4	9.53	0.34	20.67	20.16	29.71	77.7	88.9	66
FALSE	High	IsMasterProtein	P38221	CDS1	D6VQ30; P38221; sce:YBR029C	Phosphatidate cytidylyltransferase [OS=Saccharomyces cerevisiae S288C]	6.658	0	4	2	2	2	2	51.8	5.11	4	2	2	62	0	23.776	26.019	23.291	13.892	4.57	4.7	4.54	3.8	0.0313061	0.0272712	0.0323144	0.0764312	0.196178	0.233637	0.258513	0.328912	157.7	172.6	154.5	92.2	6.6	8.04	11.19	8.46	43.79	56.84	169.5	151.2	189.7
FALSE	High	IsMasterProtein	P0CX28	RPL42B	D3DL90; P02405; P0CX28; sce:YHR141C; sce:YNL162W	60S ribosomal protein L42-B [OS=Saccharomyces cerevisiae S288C]	5.673	0	19	3	3	3	3	12.2	4.78	19	3	3	57	0	2.716	7.574	4.336	6.157	1.44	2.92	2.12	2.62	0.280232	0.0154919	0.0725267	0.0208743	0.680733	0.177847	0.363253	0.146247	64.3	179.3	102.7	145.8	23.7	21.11	4.05	13.31	27.59	70.92	71.8	53.1	177.3
FALSE	High	IsMasterProtein	Q03862	ARX1	D6VS88; Q03862; sce:YDR101C	Probable metalloprotease ARX1 [OS=Saccharomyces cerevisiae S288C]	39.378	0	19	9	13	9	9	65.2	44.24	19	13	9	61	0	1.497	0.834	1.341	1.024	0.58	-0.26	0.42	0.03	0.0610311	0.604578	0.204991	0.997175	0.28506	1	0.643538	1	134.5	74.9	120.5	92	89.9	0.11	5.04	4.86	14.18	19.95	134.2	134.4	77.5
FALSE	High	IsMasterProtein	P08018	PBS2	D6VW57; P08018; sce:YJL128C	MAP kinase kinase PBS2 [OS=Saccharomyces cerevisiae S288C]	72.484	0	27	14	19	13	14	72.7	62.63	27	19	14	143	0	2.644	1.014	1.855	1.345	1.4	0.02	0.89	0.43	0.201995	1	0.579641	0.441331	0.559259	1	1	0.966119	180.9	69.4	126.9	92	68.4	7.85	29.43	4.94	70.23	12.72	168	150.3	49.3
FALSE	High	IsMasterProtein	P12754	GCD2	D6VUL5; P12754; sce:YGR083C	Translation initiation factor eIF-2B subunit delta [OS=Saccharomyces cerevisiae S288C]	5.96	0	4	2	2	2	2	70.8	6.84	4	2	2	72	0	1.114	0.858	1.253	1.846	0.16	-0.22	0.33	0.88	0.999997	0.999981	0.999868	0.996801	1	1	1	1	88.7	68.3	99.8	146.9	79.6	10.51	13.25	7.95	81.54	17.19	101.5	87.4	79.7
FALSE	High	IsMasterProtein	P47098	TY1B-JR1	D6VWJ9; P47098; P87194; sce:YJR027W	Transposon Ty1-JR1 Gag-Pol polyprotein [OS=Saccharomyces cerevisiae S288C]	86.433	0	13	18	23	0	3	198.5	72.17	13	23	18	97	11	1.376	1.132	1.33	3.49	0.46	0.18	0.41	1.8	0.410533	0.960556	0.511023	0.000465365	0.856085	1	1	0.0173549	84.4	69.5	81.6	214.1	61.4	9.7	10.13	2.93	22.23	14.12	82.4	71.8	68
FALSE	Low	IsMasterProtein	P32875	LIP5	D6W2Q5; P32875; sce:YOR196C	Lipoyl synthase, mitochondrial [OS=Saccharomyces cerevisiae S288C]	0.974	81	5	1	1	1	1	46.2	2	5	1	1	59	0
FALSE	High	IsMasterProtein	P04807	HXK2	D6VV82; P04807; Q05838; sce:YGL253W	Hexokinase-2 [OS=Saccharomyces cerevisiae S288C]	50.29	0	33	9	13	8	8	53.9	41.26	33	13	9	169	1	0.762	0.466	0.548	0.404	-0.39	-1.1	-0.87	-1.31	0.835555	0.0913516	0.214416	0.0338487	1	0.455963	0.664054	0.186087	120.5	73.7	86.6	63.9	158.2	15.84	3.78	1.67	30.94	27	108.6	136	76.4
FALSE	High	IsMasterProtein	P25443	RPS2	D6VU25; P25443; sce:YGL123W	40S ribosomal protein S2 [OS=Saccharomyces cerevisiae S288C]	79.54	0	61	12	22	12	12	27.4	71.88	61	22	12	134	0	0.482	1.669	0.643	1.203	-1.05	0.74	-0.64	0.27	0.250891	0.555253	0.681058	0.999945	0.630796	1	1	1	47.7	165.2	63.7	119.1	99	13.45	38.41	13.86	36.7	10.71	52.1	43	216.7
FALSE	High	IsMasterProtein	P02994	TEF1; TEF2	D6VQB6; P02994; Q7Z7U8; Q7Z8Q8; Q7Z8Q9; sce:YBR118W; sce:YPR080W	Elongation factor 1-alpha [OS=Saccharomyces cerevisiae S288C]	236.956	0	57	26	95	26	26	50	298.36	57	95	26	190	0	1.574	2.202	1.168	0.779	0.65	1.14	0.22	-0.36	0.620654	0.169414	0.991684	0.705225	1	0.670645	1	1	120.1	168	89.1	59.5	76.3	10.53	54.28	10.54	28.9	2.32	132.1	113.8	257.1
FALSE	High	IsMasterProtein	Q02979	GDE1	D6W3Q7; Q02979; sce:YPL110C	Glycerophosphocholine phosphodiesterase GDE1 [OS=Saccharomyces cerevisiae S288C]	52.374	0	9	9	13	9	9	137.9	42.19	9	13	9	33	0	1.641	1.237	2.045	1.275	0.71	0.31	1.03	0.35	0.294295	0.903646	0.0836886	0.441438	0.707416	1	0.380072	0.966119	114.5	86.3	142.7	88.9	69.8	20.21	7.35	13.59	34.86	17.24	127.8	95.8	87.9
FALSE	High	IsMasterProtein	P29478	SEC65	D6W0H9; P29478; sce:YML105C	Signal recognition particle subunit SEC65 [OS=Saccharomyces cerevisiae S288C]	30.615	0	29	6	8	6	6	31.2	19.64	29	8	6	51	0	1.228	0.499	1.49	1.089	0.3	-1	0.57	0.12	0.461623	0.0046488	0.063321	0.956459	0.906762	0.120442	0.336833	1	121.9	49.6	147.9	108.1	99.3	7.64	1.81	19.53	13.27	4.64	124.6	138.9	54.2
FALSE	High	IsMasterProtein	P32525	ECM25	D6VVZ2; P32525; sce:YJL201W	Protein ECM25 [OS=Saccharomyces cerevisiae S288C]	6.085	0	2	1	2	1	1	68.4	6.39	2	2	1	28	0	1.031	0.976	0.866	0.811	0.04	-0.04	-0.21	-0.3	0.999975	0.999992	0.965012	0.863931	1	1	1	1	105.5	99.9	88.6	83	102.3	3.31	10.35	3.36	35	23.74	110.7	116	115.5
FALSE	Medium	IsMasterProtein	Q05947	UCC1	D6VYM4; Q05947; sce:YLR224W	F-box protein UCC1 [OS=Saccharomyces cerevisiae S288C]	1.381	52	2	1	1	1	1	42.7	1.63	2	1	1	50	0	0.632	0.757	0.932	2.96	-0.66	-0.4	-0.1	1.57	0.813804	0.969171	0.999948	0.0370281	1	1	1	0.200685	54.1	64.7	79.7	253.1	85.5	15.74	3.91	3.07	64.97	40.83	42.2	33.7	43.9
FALSE	Low	IsMasterProtein	P18494	GLN3	D3DLU0; P18494; sce:YER040W	Nitrogen regulatory protein GLN3 [OS=Saccharomyces cerevisiae S288C]	1.092	74	1	1	1	1	1	79.3	1.64	1	1	1	165	0	1.006	0.958	1.291	1.45	0.01	-0.06	0.37	0.54	1	0.999972	0.907293	0.710302	1	1	1	1	90.7	86.4	116.4	130.8	90.2	10.44	16.06	10.54	27.39	48.36	104.1	89.8	103.2
FALSE	High	IsMasterProtein	P33442	RPS1A	D6VZ76; P33442; sce:YLR441C	40S ribosomal protein S1-A [OS=Saccharomyces cerevisiae S288C]	75.065	0	69	19	25	4	4	28.7	69.55	69	25	19	64	0	0.87	1.462	0.917	0.669	-0.2	0.55	-0.13	-0.58	0.999999	0.999797	1	0.750483	1	1	1	1	86.6	145.6	91.3	66.7	99.6	4.11	32.34	9.21	88.36	34.61	93.5	88.3	192.8
FALSE	Low	IsMasterProtein	P00410	COX2	A0A0A7NYF9; P00410; sce:Q0250	Cytochrome c oxidase subunit 2 [OS=Saccharomyces cerevisiae S288C]	1.074	74	3	1	1	1	1	28.5	1.79	3	1	1	81	0	0.468	1.144	0.631	0.698	-1.09	0.19	-0.66	-0.52	0.0359673	0.972672	0.249327	0.379939	0.214126	1	0.741273	0.871358	58.2	142.1	78.3	86.7	124.2	7.75	27.93	15.04	21.47	2.99	55.1	61.5	173.6
FALSE	High	IsMasterProtein	Q05580	HEL2	D6VSQ0; Q05580; sce:YDR266C	E3 ubiquitin-protein ligase HEL2 [OS=Saccharomyces cerevisiae S288C]	44.557	0	23	15	16	14	15	72.7	33.8	23	16	15	120	0	2.285	0.883	1.445	1.135	1.19	-0.18	0.53	0.18	0.00193501	0.89015	0.118399	0.99097	0.0453739	1	0.459595	1	177.6	68.7	112.3	88.3	77.7	14.22	1.14	8.7	17.67	0.72	200.1	163.5	70.5
FALSE	High	IsMasterProtein	P38817	GGA2	D3DL58; P38817; sce:YHR108W	ADP-ribosylation factor-binding protein GGA2 [OS=Saccharomyces cerevisiae S288C]	37.439	0	16	7	9	6	6	64.3	30.15	16	9	7	82	0	1.018	0.495	0.766	0.665	0.03	-1.02	-0.38	-0.59	0.999991	0.00896683	0.419051	0.0272987	1	0.142381	1	0.164453	129.8	63.1	97.8	84.8	127.6	0.49	8.64	2.19	18.66	5.35	134.1	133.2	69.1
FALSE	High	None	P46990	RPL17B	D6VW12; P46990; sce:YJL177W	60S ribosomal protein L17-B [OS=Saccharomyces cerevisiae S288C]	31.908	0	32	5	7	0	5	20.5	21.25	32	7	5	75	0	0.365	1.498	0.542	0.544	-1.46	0.58	-0.88	-0.88	0.302782	0.928026	0.726778	0.611766	0.716558	1	1	1	47	193	69.7	70	128.8	21.52	36.12	8.74	64.87	28.79	53.9	39.7	246.8
FALSE	High	IsMasterProtein	P04840	POR1	D6W1C3; P04840; sce:YNL055C	Mitochondrial outer membrane protein porin 1 [OS=Saccharomyces cerevisiae S288C]	31.109	0	24	6	9	6	6	30.4	26.16	24	9	6	141	0	0.53	1.28	0.664	1.661	-0.92	0.36	-0.59	0.73	0.886024	0.997834	0.978949	0.999974	1	1	1	1	47.1	113.8	59	147.7	88.9	4.77	49.44	7.27	72.06	4.6	45.1	48.3	162.3
FALSE	High	None	P14065	GCY1	D6W2H9; P14065; sce:YOR120W	Glycerol 2-dehydrogenase (NADP(+)) [OS=Saccharomyces cerevisiae S288C]	20.461	0	7	2	4	0	2	35.1	13.8	7	4	2	58	0	2.042	0.597	2.305	1.787	1.03	-0.74	1.2	0.84	0.00855673	0.0398106	0.00382098	0.0232788	0.0927517	0.287046	0.081302	0.152842	119.8	35	135.2	104.9	58.7	3.94	1.85	5.81	25.51	5.82	125.7	132.9	37.3
FALSE	High	IsMasterProtein	P10659	SAM1	D6VYI4; P10659; sce:YLR180W	S-adenosylmethionine synthase 1 [OS=Saccharomyces cerevisiae S288C]	51.492	0	26	9	11	3	3	41.8	34.64	26	11	9	56	0	1.602	2.718	1.503	1.929	0.68	1.44	0.59	0.95	0.674395	0.104084	0.777669	0.254511	1	0.497869	1	0.704658	92.8	157.5	87.1	111.8	58	2.19	22.78	21.31	31.98	3.1	87.1	89.8	176.6
FALSE	High	IsMasterProtein	Q12377	RPN6	D6VRQ3; Q12377; sce:YDL097C	26S proteasome regulatory subunit RPN6 [OS=Saccharomyces cerevisiae S288C]	2.084	9	2	1	1	1	1	49.7	0	2	1	1	55	0
FALSE	High	None	P09440	MIS1	D6VQ83; P09440; sce:YBR084W	C-1-tetrahydrofolate synthase, mitochondrial [OS=Saccharomyces cerevisiae S288C]	5.638	0	1	1	1	0	1	106.2	3.7	1	1	1	119	0	0.58	1.114	0.634	0.922	-0.79	0.16	-0.66	-0.12	0.535907	0.998954	0.68725	0.999999	0.976716	1	1	1	67	128.7	73.2	106.5	115.5	11.44	17	1.58	51.49	32.51	58.1	68.3	136.5
FALSE	Medium	IsMasterProtein	P28743	KIP2	D6W3L3; P28743; sce:YPL155C	Kinesin-like protein KIP2 [OS=Saccharomyces cerevisiae S288C]	1.255	63	2	1	1	1	1	78.3	2.15	2	1	1	120	0	0.285	0.753	0.232	0.202	-1.81	-0.41	-2.11	-2.31	0.834309	0.999709	0.744214	0.679525	1	1	1	1	59.4	157	48.4	42.2	208.6	108.01	59.22	126.3	24.65	17.32	147.7	19.8	223.2
FALSE	High	None	P39987	ECM10	D3DLL9; P39987; sce:YEL030W	Heat shock protein SSC3, mitochondrial [OS=Saccharomyces cerevisiae S288C]	4.666	1	2	2	2	0	2	70	5.25	2	2	2	94	0
FALSE	High	IsMasterProteinCandidate	P0C2H7	RPL27B	D6VT95; P0C2H7; P38706; sce:YDR471W	60S ribosomal protein L27-B [OS=Saccharomyces cerevisiae S288C]	19.801	0	35	5	7	0	5	15.5	18.29	35	7	5	48	0	0.39	1.057	0.522	0.782	-1.36	0.08	-0.94	-0.35	0.20757	0.999981	0.515431	0.947707	0.565909	1	1	1	51.7	140.4	69.4	103.9	132.8	7.69	34.28	11.49	55.52	23.91	52.9	47.4	174.1
FALSE	High	IsMasterProtein	P38623	RCK2	D6VYP6; P38623; Q02532; Q06557; sce:YLR248W	Serine/threonine-protein kinase RCK2 [OS=Saccharomyces cerevisiae S288C]	16.751	0	10	5	5	5	5	68	14.52	10	5	5	80	0	0.99	0.419	0.847	0.502	-0.02	-1.26	-0.24	-1	1	0.0605781	0.976842	0.217997	1	0.360252	1	0.64061	136.1	57.6	116.5	69	137.6	5.62	1.74	1.85	35.97	26.27	129.3	140	57.6
FALSE	High	IsMasterProtein	O14467	MBF1	D6W2Z8; O14467; Q7LGJ8; Q86ZS7; sce:YOR298C-A	Multiprotein-bridging factor 1 [OS=Saccharomyces cerevisiae S288C]	23.108	0	42	7	7	7	7	16.4	15.09	42	7	7	81	0	8.101	3.577	3.745	2.236	3.02	1.84	1.9	1.16	0.000456693	0.00899363	0.00737872	0.0564044	0.0218642	0.142381	0.116542	0.270627	237.5	104.8	109.8	65.5	29.3	30.07	3.6	2.6	10.13	34.5	298.4	193.7	103.5
FALSE	High	IsMasterProtein	Q03016	GIP3	D6W3N1; Q03016; sce:YPL137C	GLC7-interacting protein 3 [OS=Saccharomyces cerevisiae S288C]	3.253	3	1	1	1	1	1	140.8	2.78	1	1	1	33	0
FALSE	Medium	None	P36168	ESL2	D6VXF7; P36168; sce:YKR096W	EST/SMG-like protein 2 [OS=Saccharomyces cerevisiae S288C]	1.453	49	1	1	1	0	1	137.4	2.07	1	1	1	67	0	5.258	17.677	6.691	7.978	2.39	4.14	2.74	3	0.650561	0.194781	0.533487	0.829558	1	0.723653	1	1	76.5	257.1	97.3	116	14.5	26.26	5.34	24.03	80.64	65.12	65	94.7	273.9
FALSE	High	IsMasterProtein	P21339	MSB1	D6W2P4; P21339; sce:YOR188W	Morphogenesis-related protein MSB1 [OS=Saccharomyces cerevisiae S288C]	19.755	0	7	6	6	6	6	129.9	16.23	7	6	6	5	0	0.525	0.723	0.663	1.111	-0.93	-0.47	-0.59	0.15	0.743879	0.977441	0.942091	0.874174	1	1	1	1	64.9	89.3	82	137.2	123.5	3.31	20.17	0.63	91.76	5.91	50.9	48.5	59.2
FALSE	High	IsMasterProtein	P08566	ARO1	D6VSB3; P08566; sce:YDR127W	Pentafunctional AROM polypeptide [OS=Saccharomyces cerevisiae S288C]	36.722	0	7	9	9	9	9	174.6	28.53	7	9	9	78	0	0.97	1.205	1.216	0.851	-0.04	0.27	0.28	-0.23	0.998042	0.245697	0.212084	0.420223	1	0.844493	0.661925	0.928532	89.1	110.7	111.7	78.1	91.8	7.81	8.15	9.13	5.48	10.4	95.2	85.3	118.5
FALSE	High	IsMasterProtein	P15303	SEC23	D6W4I1; P15303; sce:YPR181C	Protein transport protein SEC23 [OS=Saccharomyces cerevisiae S288C]	3.069	3	1	1	1	1	1	85.3	2.57	1	1	1	132	0	0.566	0.878	0.709	0.698	-0.82	-0.19	-0.5	-0.52	0.988166	0.99999	0.998842	0.683906	1	1	1	1	61.5	95.5	77.1	75.9	108.7	13.23	21.39	6.76	81.55	27.84	59.4	71.6	117.8
FALSE	High	IsMasterProtein	P32770	NRP1	D6VRI4; P32770; Q12228; sce:YDL167C	Putative RNA-binding protein involved in heterochromatin assembly [OS=Saccharomyces cerevisiae S288C]	60.056	0	19	9	14	9	9	79.3	48.79	19	14	9	27	0	1.089	1.111	1.377	5.246	0.12	0.15	0.46	2.39	0.999497	0.998636	0.854929	0.00743703	1	1	1	0.0932285	58.6	59.7	74.1	282.1	53.8	8.78	0.96	6.81	42.65	5.11	52.6	59.6	57.5
FALSE	High	IsMasterProtein	Q04368	CSI1	D6VZJ9; Q04368; sce:YMR025W	Cop9 signalosome-interactor 1 [OS=Saccharomyces cerevisiae S288C]	56.365	0	45	10	14	10	10	34.5	42.78	45	14	10	45	0	0.88	0.243	0.837	0.525	-0.18	-2.04	-0.26	-0.93	0.999717	0.135371	0.998583	0.286384	1	0.575578	1	0.754715	126.2	34.8	120	75.3	143.4	3.45	8.44	2.38	63.55	2.64	129	135.5	34.3
FALSE	High	IsMasterProtein	P53316	RIE1	D6VV30; P53316; sce:YGR250C	Uncharacterized RNA-binding protein YGR250C [OS=Saccharomyces cerevisiae S288C]	182.366	0	42	29	44	29	29	89.5	129.13	42	44	29	13	0	1.305	1.317	2.013	5.827	0.38	0.4	1.01	2.54	0.971481	0.967295	0.461684	0.0167556	1	1	1	0.126659	60.7	61.2	93.6	270.9	46.5	3.3	24.9	17.42	53.55	10.24	56.7	54.1	66.8
FALSE	High	None	P35172	NTH2	D6VQ02; P35172; sce:YBR001C	Probable trehalase [OS=Saccharomyces cerevisiae S288C]	8.174	0	2	2	3	0	2	89.6	7.18	2	3	2	33	0	3.999	2.962	4.745	2.756	2	1.57	2.25	1.46	0.0211898	0.0672315	0.0114751	0.057021	0.15341	0.372859	0.146031	0.270627	129.9	96.2	154.2	89.5	32.5	10.35	4.18	2.25	4.15	62.56	138.6	119.7	98.2
FALSE	Low	IsMasterProtein	P24813	CAD1	D6VT53; P24813; Q02259; sce:YDR423C	AP-1-like transcription factor YAP2 [OS=Saccharomyces cerevisiae S288C]	0.908	90	1	1	1	1	1	45.7	0	1	1	1	104	0
FALSE	High	IsMasterProtein	P39517	DHH1	D6VRJ0; P39517; sce:YDL160C	ATP-dependent RNA helicase DHH1 [OS=Saccharomyces cerevisiae S288C]	147.406	0	40	18	37	18	18	57.5	139.95	40	37	18	178	0	1.222	0.995	1.451	3.993	0.29	-0.01	0.54	2	0.941084	1	0.607525	0.00619422	1	1	1	0.0829701	70.2	57.2	83.4	229.6	57.5	2.93	12.29	12.24	35.29	5.73	67	69.8	51
FALSE	High	IsMasterProtein	Q12496		D6W1W9; Q12496; sce:YOL098C	Uncharacterized protein YOL098C [OS=Saccharomyces cerevisiae S288C]	5.28	1	1	1	1	1	1	118.3	3.01	1	1	1	14	0
FALSE	High	IsMasterProtein	P34761	WHI3	D6W0Z0; P34761; sce:YNL197C	Protein WHI3 [OS=Saccharomyces cerevisiae S288C]	71.619	0	20	13	20	11	11	71.2	57.71	20	20	13	133	0	2.656	1.297	3.202	6.57	1.41	0.37	1.68	2.72	0.941001	0.999856	0.888617	0.959515	1	1	1	1	98.1	47.9	118.3	242.6	36.9	11.62	7.65	12.33	85.16	0.79	108.3	91.8	46.1
FALSE	High	IsMasterProtein	Q07362	PBP4	D6VRU3; Q07362; sce:YDL053C	Protein PBP4 [OS=Saccharomyces cerevisiae S288C]	5.071	1	5	1	1	1	1	19.9	2.65	5	1	1	12	0	1.632	0.913	1.615	7.355	0.71	-0.13	0.69	2.88	0.840997	0.999903	0.851741	0.00395474	1	1	1	0.0616867	69.2	38.7	68.5	311.9	42.4	18.45	20.94	22.38	78.62	24.89	46.4	35.7	26.4
FALSE	High	IsMasterProtein	P32342	SRP21	D6VXG8; P32342; sce:YKL122C	Signal recognition particle subunit SRP21 [OS=Saccharomyces cerevisiae S288C]	5.014	1	11	1	1	1	1	18.4	3.09	11	1	1	50	0	0.157	0.356	0.23	0.404	-2.67	-1.49	-2.12	-1.31	0.0992382	0.517853	0.222033	0.574427	0.364749	1	0.681878	1	33.1	74.9	48.3	85	210.4	25.28	35.01	4.08	85.79	37.78	25.5	36.6	88.9
FALSE	High	IsMasterProtein	P41810	SEC26	D6VSL9; P41810; Q03779; sce:YDR238C	Coatomer subunit beta [OS=Saccharomyces cerevisiae S288C]	90.636	0	23	19	25	19	19	109	73.71	23	25	19	59	0	0.829	2.177	1.137	0.833	-0.27	1.12	0.19	-0.26	0.987179	0.240423	0.997729	0.999999	1	0.833854	1	1	67.7	178	93	68.1	81.8	4	15.28	7.71	60.47	8.1	63.6	67.3	191.5
FALSE	High	None	P0C2J0	TY1B-PR2	D6W4F5; P0C2J0; sce:YPR158W-B	Transposon Ty1-PR2 Gag-Pol polyprotein [OS=Saccharomyces cerevisiae S288C]	77.009	0	11	16	21	0	2	198.5	65.69	11	21	16	97	0	0.823	0.794	0.464	3.415	-0.28	-0.33	-1.11	1.77	0.999906	0.999786	0.949347	0.999119	1	1	1	1	61	58.8	34.4	253.1	74.1	15.42	4.46	39.15	79.75	7.12	71.9	57.8	60.3
FALSE	High	None	P36172	VBA5	D6VXG6; P36172; sce:YKR105C	Vacuolar basic amino acid transporter 5 [OS=Saccharomyces cerevisiae S288C]	2.334	5	1	1	1	0	1	63.3	2.11	1	1	1	49	0
FALSE	High	IsMasterProtein	P27476	NSR1	D6VUT9; P27476; sce:YGR159C	Nuclear localization sequence-binding protein [OS=Saccharomyces cerevisiae S288C]	58.597	0	26	11	14	11	11	44.5	42.84	26	14	11	80	0	0.755	1.403	1.004	1.181	-0.4	0.49	0.01	0.24	0.886349	0.793018	1	0.805185	1	1	1	1	71.5	132.9	95.1	111.8	94.7	12.64	0.96	0.96	39.48	21.75	73.2	61.2	125.1
FALSE	High	IsMasterProtein	Q03466	EBS1	D6VSI7; Q03466; sce:YDR206W	Nonsense-mediated mRNA decay factor EBS1 [OS=Saccharomyces cerevisiae S288C]	54.977	0	15	11	13	11	11	99.9	39.5	15	13	11	84	0	0.997	0.766	1.308	3.947	0	-0.38	0.39	1.98	1	0.988111	0.987603	0.298779	1	1	1	0.768582	65.4	50.3	85.8	258.8	65.6	3.73	0.03	7.62	59.54	4.6	64	67.4	50.5
FALSE	High	IsMasterProtein	P39007	STT3	D6VUB5; P39007; sce:YGL022W	Dolichyl-diphosphooligosaccharide--protein glycosyltransferase subunit STT3 [OS=Saccharomyces cerevisiae S288C]	3.601	3	1	1	1	1	1	81.5	2.79	1	1	1	67	0	3.139	9.362	4.461	3.075	1.65	3.23	2.16	1.62	0.258482	0.0202734	0.109915	0.271429	0.642848	0.197246	0.440451	0.730378	82.1	244.9	116.7	80.5	26.2	12.85	9.84	3.86	29.66	15.82	94.7	78.9	276.4
FALSE	High	IsMasterProtein	Q01477	UBP3	D3DM58; Q01477; sce:YER151C	Ubiquitin carboxyl-terminal hydrolase 3 [OS=Saccharomyces cerevisiae S288C]	205.371	0	37	34	63	34	34	101.9	193.01	37	63	34	121	0	1.49	1.144	1.464	6.313	0.58	0.19	0.55	2.66	0.491476	0.985042	0.531361	0.000523092	0.934944	1	1	0.0173725	72	55.3	70.8	305.1	48.3	10.22	0.58	13.81	32.88	5.72	72	62.3	51.6
FALSE	High	IsMasterProtein	P40523		D6VVM7; P40523; sce:YIL055C	Uncharacterized protein YIL055C [OS=Saccharomyces cerevisiae S288C]	15.891	0	6	3	4	3	3	70.7	12.13	6	4	3	0	0	0.594	0.615	0.717	2.477	-0.75	-0.7	-0.48	1.31	0.996063	0.99718	0.999535	0.999982	1	1	1	1	56.1	58.2	67.8	234.1	94.5	13.62	1.56	0.25	85.6	10.47	51.5	62.5	58.2
FALSE	High	IsMasterProtein	P41940	PSA1	D6VRU1; P41940; sce:YDL055C	Mannose-1-phosphate guanyltransferase [OS=Saccharomyces cerevisiae S288C]	80.936	0	50	15	20	15	15	39.5	63.49	50	20	15	79	0	0.827	2.048	0.943	1.062	-0.27	1.03	-0.08	0.09	0.850111	0.0267147	0.998938	0.998914	1	0.23059	1	1	70	173.3	79.8	89.9	84.6	8.03	26.52	0.74	18.49	1.74	74.1	66.2	209.6
FALSE	Low	IsMasterProtein	P25491	YDJ1	D6W1B6; P25491; sce:YNL064C	Mitochondrial protein import protein MAS5 [OS=Saccharomyces cerevisiae S288C]	0.965	82	2	1	1	1	1	44.6	2.18	2	1	1	164	0	0.855	0.947	0.998	1.061	-0.23	-0.08	0	0.09	0.996011	0.999976	1	0.882712	1	1	1	1	87.6	97.1	102.3	108.8	102.5	11.82	12.09	17.82	63.77	16.83	84.3	71.3	93.6
FALSE	High	IsMasterProtein	P48524	BUL1	D6W0A2; P48524; sce:YMR275C	Ubiquitin ligase-binding protein BUL1 [OS=Saccharomyces cerevisiae S288C]	8.876	0	3	2	3	2	2	109.1	8.2	3	3	2	112	0	0.735	0.582	0.701	0.429	-0.44	-0.78	-0.51	-1.22	0.996829	0.962457	0.993941	0.315256	1	1	1	0.784046	100.4	79.5	95.8	58.5	136.6	4.93	13.26	1.41	76.25	3.23	102.4	109.8	92.2
FALSE	High	IsMasterProtein	Q04336		D6W021; Q04336; sce:YMR196W	Uncharacterized protein YMR196W [OS=Saccharomyces cerevisiae S288C]	14.17	0	6	4	4	4	4	126.5	11.91	6	4	4	13	0	0.694	0.591	1.082	0.976	-0.53	-0.76	0.11	-0.04	0.954213	0.832459	0.999963	0.981608	1	1	1	1	79.7	67.8	124.2	112	114.8	14.31	1.6	3.75	85.53	0.06	74.1	60.5	56.4
FALSE	High	IsMasterProtein	Q01560	NPL3	D6VT60; Q01560; sce:YDR432W	Serine/arginine (SR)-type shuttling mRNA binding protein NPL3 [OS=Saccharomyces cerevisiae S288C]	54.85	0	22	7	10	7	7	45.4	39.12	22	10	7	160	0	0.374	0.476	0.397	0.331	-1.42	-1.07	-1.33	-1.59	0.0105987	0.0442064	0.0147947	0.00306198	0.101483	0.296302	0.16178	0.0502602	70.9	90.3	75.3	62.8	189.6	5.93	1.13	5.35	22.73	26.28	69.4	75.4	91.3
FALSE	High	IsMasterProtein	P53538	SSU72	D6W0W8; P53538; Q6Q569; sce:YNL222W	RNA polymerase II subunit A C-terminal domain phosphatase SSU72 [OS=Saccharomyces cerevisiae S288C]	10.544	0	17	3	3	3	3	23.5	5.91	17	3	3	111	0	1.692	0.677	0.891	0.495	0.76	-0.56	-0.17	-1.01	0.0537741	0.16402	0.943331	0.014502	0.270993	0.659792	1	0.114916	185.5	74.3	97.7	54.3	109.7	25.4	7.74	13.04	0.79	12.06	166.5	239.4	75.7
FALSE	High	IsMasterProtein	Q01217	ARG5,6	D3DLX4; Q01217; sce:YER069W	Protein ARG5,6, mitochondrial [OS=Saccharomyces cerevisiae S288C]	13.95	0	6	3	3	3	3	94.8	12.55	6	3	3	105	0	2.208	1.954	2.147	1.817	1.14	0.97	1.1	0.86	0.0246899	0.0547838	0.0294655	0.10987	0.169872	0.338128	0.244751	0.409871	120.3	106.5	117	99	54.5	1.98	5.12	6.14	14.89	24.95	123.3	119.9	111.6
FALSE	High	IsMasterProtein	P41057	RPS29A	A2TBM8; D6VZ23; P05761; P41057; sce:YLR388W	40S ribosomal protein S29-A [OS=Saccharomyces cerevisiae S288C]	3.647	3	14	2	2	2	2	6.7	1.98	14	2	2	52	0	2.15	2.658	2.22	2.521	1.1	1.41	1.15	1.33	0.474457	0.266245	0.437691	0.0929544	0.914689	0.885938	1	0.376072	105	129.8	108.4	123.1	48.8	14.94	7.23	3.15	64.79	33.77	99.2	80.3	104.8
FALSE	High	IsMasterProtein	P32775	GLC3	D3DLN8; P32775; sce:YEL011W	1,4-alpha-glucan-branching enzyme [OS=Saccharomyces cerevisiae S288C]	3.067	3	1	1	1	1	1	81.1	1.93	1	1	1	45	0	6.771	4.575	7.408	4.748	2.76	2.19	2.89	2.25	0.00582578	0.0202694	0.00447035	0.0161931	0.0743757	0.197246	0.0887622	0.124277	151.9	102.6	166.2	106.5	22.4	6.09	0.48	1.05	23.58	60.22	159.7	146.5	103
FALSE	High	IsMasterProtein	P40029	MXR1	D3DLU2; P40029; sce:YER042W	Peptide methionine sulfoxide reductase [OS=Saccharomyces cerevisiae S288C]	6.088	0	15	2	2	2	2	21.1	5.52	15	2	2	24	0	1.379	0.787	1.63	1.227	0.46	-0.35	0.7	0.3	0.311913	0.560303	0.0815898	0.688115	0.725221	1	0.376493	1	118.7	67.8	140.3	105.7	86.1	7.48	4.87	14.77	3.3	2.53	121.4	135	75.6
FALSE	High	None	P0CX61	TY2A-F	D6VTM8; P0CX61; Q99195; sce:YFL002W-B; sce:YGR161W-A	Transposon Ty2-F Gag polyprotein [OS=Saccharomyces cerevisiae S288C]	17.136	0	15	5	6	0	5	49.7	16.45	15	6	5	21	0	2.392	1.145	2.81	3.232	1.26	0.2	1.49	1.69	0.0956673	0.994179	0.0460419	0.0123355	0.355734	1	0.276497	0.107375	123.9	59.3	145.6	167.4	51.8	10.35	8.48	17.49	46.9	2.08	120.5	104.1	50.5
FALSE	High	IsMasterProtein	P34167	TIF3	D6W4G4; P34167; sce:YPR163C	Eukaryotic translation initiation factor 4B [OS=Saccharomyces cerevisiae S288C]	230.071	0	86	36	65	36	36	48.5	194.63	86	65	36	81	0	2.98	0.639	2.053	1.711	1.58	-0.65	1.04	0.77	6.2159e-05	0.0147549	0.000926376	0.00263508	0.00714207	0.174625	0.0455965	0.0467073	187	40.1	128.8	107.4	62.8	10.14	2.16	13.52	11.91	3.97	171.9	198.4	39
FALSE	High	IsMasterProtein	P36088		D6VXL7; P36088; sce:YKL069W	Free methionine-R-sulfoxide reductase [OS=Saccharomyces cerevisiae S288C]	4.506	1	7	1	1	1	1	19.7	3.22	7	1	1	19	0	4.15	4.567	4.82	2.89	2.05	2.19	2.27	1.53									129.5	142.5	150.4	90.2	31.2	18.56	9.69	8.37	12.96		122.9	160.1	165.4
FALSE	High	IsMasterProtein	P09733	TUB1	D6W0J8; P09733; sce:YML085C	Tubulin alpha-1 chain [OS=Saccharomyces cerevisiae S288C]	19.296	0	12	5	5	2	5	49.8	13.44	12	5	5	100	0	0.523	0.695	0.738	0.61	-0.93	-0.53	-0.44	-0.71	0.643439	0.940813	0.971242	0.989698	1	1	1	1	72.6	96.4	102.4	84.6	138.7	3.38	10.52	0.5	80.68	15.62	63.8	66.9	93.5
FALSE	High	IsMasterProtein	Q08925	MRN1	D6W3I4; Q08925; sce:YPL184C	RNA-binding protein MRN1 [OS=Saccharomyces cerevisiae S288C]	19.102	0	11	3	3	3	3	68.6	13.02	11	3	3	60	0	0.547	0.653	0.745	0.765	-0.87	-0.61	-0.42	-0.39	0.797355	0.938184	0.986447	0.742273	1	1	1	1	68.3	81.7	93.2	95.6	125	30.53	14.49	1.34	62.77	8.03	56.3	87.3	92.8
FALSE	High	IsMasterProtein	Q07478	SUB2	D6VRR5; Q07478; sce:YDL084W	ATP-dependent RNA helicase SUB2 [OS=Saccharomyces cerevisiae S288C]	13.236	0	9	3	3	3	3	50.3	9.01	9	3	3	144	0	1.151	1.713	1.566	0.813	0.2	0.78	0.65	-0.3	0.999821	0.926353	0.963635	0.998372	1	1	1	1	96.1	143	130.7	67.8	83.5	10.67	12.17	48.18	103.87	24.45	88.5	76.1	112
FALSE	Medium	IsMasterProtein	Q08965	BMS1	D6W3F3; Q08965; sce:YPL217C	Ribosome biogenesis protein BMS1 [OS=Saccharomyces cerevisiae S288C]	1.899	17	1	1	1	1	1	135.5	2.04	1	1	1	110	0	0.412	0.221	0.282	0.307	-1.28	-2.18	-1.83	-1.7	0.883776	0.520017	0.669864	0.963552	1	1	1	1	97	52.1	66.3	72.4	235.4	21.53	19.14	33.59	138.64	13.2	76.7	56.4	40.5
FALSE	High	None	O74302	TY1A-DR4	D6VSP5; O74302; sce:YDR261C-C	Transposon Ty1-DR4 Gag polyprotein [OS=Saccharomyces cerevisiae S288C]	66.975	0	38	12	17	0	0	49	51.99	38	17	12	21	0
FALSE	High	None	P21672	RNR3	D6VVL8; P21672; sce:YIL066C	Ribonucleoside-diphosphate reductase large chain 2 [OS=Saccharomyces cerevisiae S288C]	36.658	0	12	8	10	0	8	97.5	29.44	12	10	8	81	0	0.989	0.417	0.879	0.805	-0.02	-1.26	-0.19	-0.31	0.999999	0.00339651	0.927339	0.582569	1	0.0974798	1	1	124.7	52.6	110.9	101.6	126.1	30.07	1.44	5.75	3.64	18.58	99.6	153.4	51.6
FALSE	High	IsMasterProtein	P32836	GSP2	D6W2P1; P32836; sce:YOR185C	GTP-binding nuclear protein GSP2/CNR2 [OS=Saccharomyces cerevisiae S288C]	17.546	0	13	3	4	0	3	25	11.96	13	4	3	78	0	0.519	0.809	0.46	0.837	-0.95	-0.31	-1.12	-0.26	0.329074	0.972535	0.202773	0.891647	0.745631	1	0.640941	1	71.7	111.7	63.6	115.6	138.1	9.69	18.68	1.35	44.49	25.2	66.2	76	126.2
FALSE	High	IsMasterProtein	Q06385	VPS74	D6VT03; Q06385; sce:YDR372C	Vacuolar protein sorting-associated protein 74 [OS=Saccharomyces cerevisiae S288C]	4.805	1	4	1	1	1	1	39.3	3.67	4	1	1	134	0	0.872	0.517	0.77	0.625	-0.2	-0.95	-0.38	-0.68	0.963721	0.0667799	0.692319	0.217516	1	0.372859	1	0.64061	106.4	63.1	93.9	76.2	121.9	17.6	8.05	10.15	16.28	32.48	100.8	129.5	71.7
FALSE	High	IsMasterProtein	Q03619	TY1B-ER2	D3DM67; Q03619; sce:YER160C	Transposon Ty1-ER2 Gag-Pol polyprotein [OS=Saccharomyces cerevisiae S288C]	83.944	0	13	17	22	0	2	198.4	69.84	13	22	17	97	0	0.823	0.794	0.464	3.415	-0.28	-0.33	-1.11	1.77	0.999906	0.999786	0.949347	0.999119	1	1	1	1	61	58.8	34.4	253.1	74.1	15.42	4.46	39.15	79.75	7.12	71.9	57.8	60.3
FALSE	High	IsMasterProtein	Q00539	NAM8	D3DL37; Q00539; sce:YHR086W	Protein NAM8 [OS=Saccharomyces cerevisiae S288C]	26.776	0	15	5	5	5	5	56.9	18.49	15	5	5	94	0	0.485	0.494	0.518	0.961	-1.04	-1.02	-0.95	-0.06	0.698955	0.717645	0.766015	0.939387	1	1	1	1	63.7	64.9	68	126.2	131.4	16.05	0.3	8.9	64.9	13.27	57.6	72.4	65.6
FALSE	Medium	IsMasterProtein	P36164	TVP38	D6VXE8; P36164; sce:YKR088C	Golgi apparatus membrane protein TVP38 [OS=Saccharomyces cerevisiae S288C]	1.377	52	4	1	1	1	1	38.3	0	4	1	1	50	0
FALSE	High	IsMasterProtein	P05737	RPL7A	D6VU68; P05737; P87029; sce:YGL076C	60S ribosomal protein L7-A [OS=Saccharomyces cerevisiae S288C]	68.287	0	51	15	19	1	15	27.6	53.79	51	19	15	70	0	0.506	1.219	0.551	0.441	-0.98	0.29	-0.86	-1.18	0.504181	0.992803	0.622741	0.201179	0.951109	1	1	0.609906	67.9	163.8	74	59.3	134.4	3.38	30.99	6.21	56.52	10.26	67.4	70.7	208
FALSE	High	IsMasterProtein	P07245	ADE3	D6VUY6; P07245; sce:YGR204W	C-1-tetrahydrofolate synthase, cytoplasmic [OS=Saccharomyces cerevisiae S288C]	32.798	0	9	8	8	7	8	102.1	20.71	9	8	8	105	0	0.743	1.074	0.89	1.158	-0.43	0.1	-0.17	0.21	0.92455	0.999879	0.998718	0.793302	1	1	1	1	75.3	108.9	90.2	117.4	101.4	7.41	14.28	0.18	62.18	5.53	70.6	63.6	107.2
FALSE	High	IsMasterProtein	Q03102		D6W0F4; Q03102; Q6Q5K5; sce:YML131W	Uncharacterized membrane protein YML131W [OS=Saccharomyces cerevisiae S288C]	34.99	0	23	8	8	8	8	40	26.18	23	8	8	12	0	1.38	0.77	1.158	0.77	0.46	-0.38	0.21	-0.38	0.947419	0.977507	0.998311	0.487669	1	1	1	1	125.6	70.1	105.5	70.1	91	7.22	1.71	6.38	52.91	7.59	126.6	140.2	73.5
FALSE	High	IsMasterProtein	P25373	GRX1	D6VQY0; P25373; sce:YCL035C	Glutaredoxin-1 [OS=Saccharomyces cerevisiae S288C]	22.384	0	36	3	4	3	3	12.4	14.08	36	4	3	46	0	1.416	1.073	2.191	1.638	0.5	0.1	1.13	0.71	0.595824	0.999188	0.0541226	0.511771	1	1	0.310901	1	99.1	75.1	153.4	114.7	70	13.93	0.46	5.43	32.41	15.39	91	110.9	75.9
FALSE	High	IsMasterProtein	P32477	GSH1	D6VW83; P32477; sce:YJL101C	Glutamate--cysteine ligase [OS=Saccharomyces cerevisiae S288C]	15.198	0	9	4	4	4	4	78.2	12.16	9	4	4	61	0	0.755	0.551	0.748	0.75	-0.41	-0.86	-0.42	-0.42	0.508668	0.0547665	0.479705	0.486713	0.954228	0.338128	1	1	96.8	70.7	95.9	96.1	128.2	13.64	6.81	7.78	22.09	24.27	94.6	114.8	72.5
FALSE	High	IsMasterProtein	P38795	QNS1	D3DL24; P38795; sce:YHR074W	Glutamine-dependent NAD(+) synthetase [OS=Saccharomyces cerevisiae S288C]	4.357	1	1	1	1	1	1	80.6	3.69	1	1	1	76	0	3.033	3.58	4.242	2.656	1.6	1.84	2.08	1.41	0.41328	0.295045	0.204461	0.785848	0.856456	0.938261	0.643538	1	108.3	127.9	151.5	94.9	35.7	8.28	9.35	3.05	49.67	83.02	104.4	117.4	139.6
FALSE	High	IsMasterProtein	P32457	CDC3	D6VYV8; P32457; Q06161; sce:YLR314C	Cell division control protein 3 [OS=Saccharomyces cerevisiae S288C]	52.201	0	26	12	14	12	12	60	42.56	26	14	12	152	0	1.802	0.684	1.191	0.687	0.85	-0.55	0.25	-0.54	0.894252	0.980745	0.999462	0.492358	1	1	1	1	167.7	63.7	110.9	63.9	93.1	9.32	4.99	2.67	67.72	1.13	191.8	168.1	70.6
FALSE	Low	IsMasterProtein	P38347	EFM2	D6VQR7; P38347; sce:YBR271W	Protein-lysine N-methyltransferase EFM2 [OS=Saccharomyces cerevisiae S288C]	1.024	77	2	1	1	1	1	47.9	0	2	1	1	68	0
FALSE	High	IsMasterProtein	P08417	FUM1	D6W3A8; P08417; Q08978; sce:YPL262W	Fumarate hydratase, mitochondrial [OS=Saccharomyces cerevisiae S288C]	29.381	0	17	8	8	8	8	53.1	17.2	17	8	8	61	0	1.091	0.92	1.12	1.34	0.13	-0.12	0.16	0.42	0.836704	0.85856	0.65656	0.0474918	1	1	1	0.243607	83	70	85.2	101.9	76.1	10.18	4.38	2.78	9.48	6.64	89.6	77.6	68.2
FALSE	High	IsMasterProtein	Q03088	SVL3	D6W3Y1; Q03088; sce:YPL032C	Styryl dye vacuolar localization protein 3 [OS=Saccharomyces cerevisiae S288C]	6.972	0	3	2	2	2	2	92.1	5.87	3	2	2	16	0	1.509	0.874	1.38	1.364	0.59	-0.19	0.46	0.45	0.998681	0.999994	0.999595	0.755325	1	1	1	1	122.8	71.1	112.2	111	81.3	25	37.78	20.2	158.8	26.96	41.6	29.1	26.5
FALSE	High	IsMasterProtein	P24000	RPL24B	A2TBN3; D6VUS9; P24000; sce:YGR148C	60S ribosomal protein L24-B [OS=Saccharomyces cerevisiae S288C]	43.018	0	49	11	16	3	3	17.5	34.3	49	16	11	52	8	1.051	1.503	1.065	1.239	0.07	0.59	0.09	0.31	0.999754	0.366076	0.999209	0.895346	1	1	1	1	91.2	130.4	92.4	107.5	86.8	11.78	23.69	4.38	17.6	13.35	98.4	83.3	153.3
FALSE	High	IsMasterProtein	P23724	PRE7	D6VPV7; P23724; sce:YBL041W	Proteasome subunit beta type-6 [OS=Saccharomyces cerevisiae S288C]	28.195	0	32	6	7	6	6	26.9	21.15	32	7	6	38	0	0.911	0.619	1.413	0.75	-0.14	-0.69	0.5	-0.42	0.999841	0.815902	0.940406	0.650134	1	1	1	1	94.9	64.5	147.2	78.1	104.2	12.99	5.01	3.03	54.36	18.3	107.6	89.5	69.1
FALSE	Low	IsMasterProtein	P21264	ADE2	D6W2I6; P21264; sce:YOR128C	Phosphoribosylaminoimidazole carboxylase [OS=Saccharomyces cerevisiae S288C]	1.088	74	2	1	1	1	1	62.3	0	2	1	1	85	0	11.182	3.028	10.894	7.423	3.48	1.6	3.45	2.89									194.8	52.7	189.8	129.3	17.4	26.95	7.16	15.86	74.42		142.5	209.6	44.5
FALSE	High	IsMasterProtein	P29547	CAM1	D6W3W6; P29547; Q9URC6; sce:YPL048W	Elongation factor 1-gamma 1 [OS=Saccharomyces cerevisiae S288C]	23.349	0	14	6	7	2	2	47.1	20.01	14	7	6	132	0	0.521	0.795	0.661	0.47	-0.94	-0.33	-0.6	-1.09	0.00210219	0.269938	0.0263621	0.000529188	0.0483082	0.891645	0.22437	0.0173725	73.1	111.5	92.7	66	140.2	16.97	9.89	6.22	9.51	5.13	66.3	84.3	122.3
FALSE	High	IsMasterProtein	P21242	PRE10	D6W357; P21242; sce:YOR362C	Probable proteasome subunit alpha type-7 [OS=Saccharomyces cerevisiae S288C]	4.671	1	5	1	1	1	1	31.5	3.53	5	1	1	58	0
FALSE	Medium	IsMasterProtein	P38352	SAF1	D6VQS5; P38352; sce:YBR280C	SCF-associated factor 1 [OS=Saccharomyces cerevisiae S288C]	1.844	20	1	1	1	1	1	70.5	0	1	1	1	51	0
FALSE	High	IsMasterProtein	P19358	SAM2	D6VTC4; E9P927; P19358; sce:YDR502C	S-adenosylmethionine synthase 2 [OS=Saccharomyces cerevisiae S288C]	58.894	0	36	10	12	4	4	42.2	36.1	36	12	10	56	4	0.709	1.249	0.81	1.019	-0.5	0.32	-0.3	0.03	0.405494	0.770084	0.802232	0.991663	0.856085	1	1	1	72.6	128	83	104.5	102.5	2.5	22.15	5.58	23	8.02	74.9	72.3	151.8
FALSE	High	IsMasterProtein	Q08873	SCP1	D6W360; Q08873; sce:YOR367W	Transgelin [OS=Saccharomyces cerevisiae S288C]	20.145	0	22	4	6	4	4	22.7	16.35	22	6	4	36	0	0.787	0.496	0.911	0.762	-0.35	-1.01	-0.13	-0.39	0.815616	0.0652783	0.995674	0.761298	1	0.370987	1	1	93.3	58.9	108.1	90.4	118.6	33.85	4.47	0.27	19.58	15.01	72.4	117.9	60.1
FALSE	High	IsMasterProtein	P16474	KAR2	D6VWE9; P16474; sce:YJL034W	Endoplasmic reticulum chaperone BiP [OS=Saccharomyces cerevisiae S288C]	34.749	0	9	6	9	4	4	74.4	25.21	9	9	6	199	0	0.879	1.322	1.19	1.03	-0.19	0.4	0.25	0.04	0.99994	0.997537	0.999744	0.873478	1	1	1	1	81.2	122.2	110	95.2	92.4	24.03	13.7	5.74	71.23	28.9	102.4	72.6	143.1
FALSE	High	None	P04710	AAC1	D6VZN1; P04710; sce:YMR056C	ADP,ATP carrier protein 1 [OS=Saccharomyces cerevisiae S288C]	3.625	3	3	1	1	0	1	34.1	3.2	3	1	1	113	0	0.234	1.749	0.255	0.473	-2.1	0.81	-1.97	-1.08	0.0680536	0.718557	0.0867573	0.478833	0.308477	1	0.384881	1	33.3	249.4	36.4	67.5	142.6	35.76	56.79	16.52	32.66	30	44.3	26.4	391.9
FALSE	High	IsMasterProtein	P16140	VMA2	D6VQC4; P16140; P32123; sce:YBR127C	V-type proton ATPase subunit B [OS=Saccharomyces cerevisiae S288C]	178.172	0	65	26	39	26	26	57.7	142.13	65	39	26	161	0	1.496	1.496	3.167	1.291	0.58	0.58	1.66	0.37	0.10006	0.100246	0.000321124	0.30556	0.36498	0.487638	0.0300973	0.76993	89.3	89.2	189	77	59.7	9.68	27.29	1.62	8.42	9.55	96.8	84.4	109.9
FALSE	High	IsMasterProtein	P38293	UMP1	D6VQG9; P38293; sce:YBR173C	Proteasome maturation factor UMP1 [OS=Saccharomyces cerevisiae S288C]	5.468	1	10	2	2	2	2	16.7	2.86	10	2	2	53	0	0.896	0.362	1.529	0.679	-0.16	-1.47	0.61	-0.56	0.998395	0.0664457	0.683797	0.843739	1	0.372859	1	1	107.9	43.6	184	81.7	120.4	12.54	22.07	18.23	24.33	29.28	115.4	96.6	36.5
FALSE	High	None	Q12441	TY1A-DR3	D6VSJ4; Q12441; sce:YDR210C-C	Transposon Ty1-DR3 Gag polyprotein [OS=Saccharomyces cerevisiae S288C]	65.163	0	35	11	16	0	1	49.2	53.8	35	16	11	21	0	0.823	0.794	0.464	3.415	-0.28	-0.33	-1.11	1.77	0.999906	0.999786	0.949347	0.999119	1	1	1	1	61	58.8	34.4	253.1	74.1	15.42	4.46	39.15	79.75	7.12	71.9	57.8	60.3
FALSE	High	IsMasterProtein	P53091	MCM6	D6VTV3; P53091; Q870M9; sce:YGL201C	DNA replication licensing factor MCM6 [OS=Saccharomyces cerevisiae S288C]	6.432	0	2	1	1	1	1	112.9	4.73	2	1	1	142	0
FALSE	Medium	IsMasterProtein	P32458	CDC11	D6VWP6; P32458; sce:YJR076C	Cell division control protein 11 [OS=Saccharomyces cerevisiae S288C]	1.549	41	1	1	1	1	1	47.6	0	1	1	1	171	0
FALSE	High	None	P25594	VBA3	D6VQV0; P25594; sce:YCL069W	Vacuolar basic amino acid transporter 3 [OS=Saccharomyces cerevisiae S288C]	2.334	5	1	1	1	0	1	50.2	2.11	1	1	1	47	0
FALSE	Medium	None	P32522	PET309	D6VY68; P32522; sce:YLR067C	Pentatricopeptide repeat-containing protein PET309, mitochondrial [OS=Saccharomyces cerevisiae S288C]	1.7	32	1	1	1	0	1	112.6	2.06	1	1	1	107	0	4.853	17.128	3.684	3.864	2.28	4.1	1.88	1.95	0.334686	0.0463632	0.49763	0.46632	0.752553	0.305357	1	0.996671	93	328.1	70.6	74	19.2	6.64	10.2	17.08	95.82	26.48	90.9	99.8	312.7
FALSE	High	IsMasterProtein	P40106	GPP2	D3DLW7; P40106; sce:YER062C	Glycerol-1-phosphate phosphohydrolase 2 [OS=Saccharomyces cerevisiae S288C]	23.948	0	20	5	6	1	1	27.8	16.42	20	6	5	45	0	0.686	0.57	0.821	0.986	-0.54	-0.81	-0.28	-0.02	0.98356	0.919495	0.999155	1	1	1	1	1	78	64.8	93.4	112.1	113.7	10.64	5.75	77.08	1.79	48.2	82.1	70.6	60.7
FALSE	High	IsMasterProtein	P33332	SEC3	D3DLQ5; P33332; sce:YER008C	Exocyst complex component SEC3 [OS=Saccharomyces cerevisiae S288C]	4.705	1	1	1	1	1	1	154.6	4.34	1	1	1	89	0	0.599	0.725	0.839	0.794	-0.74	-0.46	-0.25	-0.33	0.621657	0.902375	0.991539	0.999332	1	1	1	1	70.5	85.3	98.6	93.4	117.6	16.13	2.56	9.87	56.72	25.3	59.4	74.7	82
FALSE	High	None	Q12266	TY1A-BL	D6VPZ7; Q12266; sce:YBL005W-A	Transposon Ty1-BL Gag polyprotein [OS=Saccharomyces cerevisiae S288C]	17.352	0	6	3	5	0	1	49.3	9.86	6	5	3	21	0	1.493	1.283	1.428	4.998	0.58	0.36	0.51	2.32	0.580332	0.888847	0.678415	0.00129442	1	1	1	0.0291626	74.8	64.3	71.6	250.4	50.1	6.75	5.15	8.01	26.43	41.34	69.1	62.8	58.7
FALSE	High	IsMasterProtein	P04449	RPL24A	A2TBN7; D6VUA7; P04449; sce:YGL031C	60S ribosomal protein L24-A [OS=Saccharomyces cerevisiae S288C]	49.571	0	44	10	18	2	2	17.6	37.76	44	18	10	52	0	1.077	1.781	1.219	1.322	0.11	0.83	0.29	0.4	0.999542	0.302968	0.96028	0.994602	1	0.954322	1	1	87.9	145.3	99.5	107.9	81.6	3.6	4.15	22.85	26.68	25.61	91.8	87.2	152.3
FALSE	High	IsMasterProtein	P23542	AAT2	D6VY29; P23542; sce:YLR027C	Aspartate aminotransferase, cytoplasmic [OS=Saccharomyces cerevisiae S288C]	78.587	0	30	11	16	11	11	46	55.96	30	16	11	70	0	1.047	0.408	1.102	0.96	0.07	-1.3	0.14	-0.06	0.992973	0.000161415	0.864919	0.999999	1	0.0264721	1	1	125.3	48.7	131.8	114.8	119.6	9.59	7.11	5.94	12.66	3.06	114.4	131.1	50.1
FALSE	High	IsMasterProtein	P37291	SHM2	D6VY60; P37291; sce:YLR058C	Serine hydroxymethyltransferase, cytosolic [OS=Saccharomyces cerevisiae S288C]	39.984	0	26	13	17	13	13	52.2	41.53	26	17	13	83	0	1.849	0.986	1.223	1.036	0.89	-0.02	0.29	0.05	0.000152175	0.999844	0.0810229	0.995315	0.0116566	1	0.375385	1	153.7	82	101.7	86.1	83.1	4.62	1.13	12.08	3.45	7.31	160.7	150.5	83.6
FALSE	Low	IsMasterProtein	Q06211	MMS1	D6W4G5; Q06211; sce:YPR164W	E3 ubiquitin-protein ligase linker protein MMS1 [OS=Saccharomyces cerevisiae S288C]	0.929	89	1	1	1	1	1	161.1	0	1	1	1	91	0
FALSE	High	IsMasterProtein	Q12242	RUP1	D6W2J5; Q12242; sce:YOR138C	UBA domain-containing protein RUP1 [OS=Saccharomyces cerevisiae S288C]	128.348	0	37	21	31	21	21	75.3	102.27	37	31	21	35	0	5.296	0.855	1.851	1.084	2.4	-0.23	0.89	0.12	3.19018e-05	0.810512	0.0149249	0.832448	0.00542951	1	0.16178	1	284.6	45.9	99.5	58.3	53.7	17.48	1.27	12.88	15.43	9.57	328.4	256.2	46.4
FALSE	High	IsMasterProtein	P31412	VMA5	D6VXK7; P31412; sce:YKL080W	V-type proton ATPase subunit C [OS=Saccharomyces cerevisiae S288C]	22.085	0	23	6	6	6	6	44.2	19.13	23	6	6	105	0	0.391	0.543	0.426	0.659	-1.36	-0.88	-1.23	-0.6	0.0525972	0.261328	0.08039	0.399636	0.268671	0.87608	0.375385	0.900062	60.1	83.5	65.6	101.3	153.7	11.32	26.55	18.76	34.14	13.46	55.2	64.8	100.5
FALSE	High	IsMasterProtein	P39076	CCT2	D6VVE5; P39076; sce:YIL142W	T-complex protein 1 subunit beta [OS=Saccharomyces cerevisiae S288C]	128.345	0	49	19	26	19	19	57.2	96.77	49	26	19	46	0	1.923	0.657	1.124	0.601	0.94	-0.61	0.17	-0.74	0.412613	0.777593	0.998791	0.170617	0.856456	1	1	0.556268	192	65.7	112.2	60	99.9	2.82	5.9	4.07	46.88	17.6	207.4	199.3	66.7
FALSE	Medium	IsMasterProtein	P24719	MEK1	D6W346; P24719; sce:YOR351C	Meiosis-specific serine/threonine-protein kinase MEK1 [OS=Saccharomyces cerevisiae S288C]	1.423	49	1	1	1	1	1	56.8	2.24	1	1	1	98	0	0.796	1.207	1.02	0.605	-0.33	0.27	0.03	-0.72	0.617884	0.764484	0.999987	0.0796911	1	1	1	0.335348	88.8	134.7	113.9	67.6	111.7	20.3	12.67	7.15	18.77	14.53	82.9	110.7	158.9
FALSE	High	IsMasterProteinCandidate	P0C5L1		P0C5L1	Putative uncharacterized protein YBL068W-A [OS=Saccharomyces cerevisiae S288C]	2.876	4	22	1	1	0	1	9.2	2.41	22	1	1	1	0
FALSE	High	IsMasterProtein	Q06632	CFT1	D6VST0; Q06632; sce:YDR301W	Protein CFT1 [OS=Saccharomyces cerevisiae S288C]	2.214	5	1	1	1	1	1	153.3	2.36	1	1	1	63	0
FALSE	High	None	P52489	PYK2	D6W342; P52489; sce:YOR347C	Pyruvate kinase 2 [OS=Saccharomyces cerevisiae S288C]	9.104	0	2	1	2	0	1	55.2	6.99	2	2	1	92	0	1.102	6.662	2.358	2.684	0.14	2.74	1.24	1.42									41	247.7	87.7	99.8	37.2	4.32	22.01	7.23	36.21		42.6	45.3	310.5
FALSE	High	IsMasterProtein	P00925	ENO2	D3DLC2; P00925; P99013; sce:YHR174W	Enolase 2 [OS=Saccharomyces cerevisiae S288C]	111.02	0	41	16	27	3	3	46.9	91.65	41	27	16	98	0	0.748	0.629	0.696	0.521	-0.42	-0.67	-0.52	-0.94	0.997619	0.980273	0.993367	0.385712	1	1	1	0.878253	90.7	76.2	84.4	63.1	121.2	13.91	2.36	1.45	74.25	2.56	106.8	87.7	80
FALSE	High	None	P00360	TDH1	D6VWD1; P00360; sce:YJL052W	Glyceraldehyde-3-phosphate dehydrogenase 1 [OS=Saccharomyces cerevisiae S288C]	34.939	0	20	7	11	0	1	35.7	31.42	20	11	7	97	0	0.594	3.901	0.933	0.96	-0.75	1.96	-0.1	-0.06	0.48158	0.014024	0.999794	1	0.920691	0.174625	1	1	42.7	280.9	67.2	69.1	72	14.41	18.09	8.14	34.75	47.81	47.2	38.5	318.8
FALSE	High	IsMasterProtein	Q03497	STE20	D3DKQ8; Q03497; sce:YHL007C	Serine/threonine-protein kinase STE20 [OS=Saccharomyces cerevisiae S288C]	50.253	0	15	11	15	11	11	102.3	42.14	15	15	11	184	0	1.873	0.733	1.258	1.165	0.91	-0.45	0.33	0.22	0.0254195	0.357407	0.625541	0.73608	0.172572	1	1	1	162.9	63.8	109.4	101.3	87	2.85	14.97	10.83	18.52	20.57	164.1	157.6	70
FALSE	High	IsMasterProtein	P38753	HSE1	D3DKR2; P38753; sce:YHL002W	Class E vacuolar protein-sorting machinery protein HSE1 [OS=Saccharomyces cerevisiae S288C]	9.369	0	8	3	3	3	3	51.1	4.32	8	3	3	126	0	0.822	1.045	1.077	1.025	-0.28	0.06	0.11	0.04	0.881059	0.999842	0.997954	0.974663	1	1	1	1	81.4	103.6	106.8	101.6	99.1	8.76	30.3	3.32	26.43	7.97	83.8	74	80.5
FALSE	High	IsMasterProtein	P05150	ARG3	D6VW96; P05150; sce:YJL088W	Ornithine carbamoyltransferase [OS=Saccharomyces cerevisiae S288C]	46.363	0	31	8	11	7	7	37.8	39.02	31	11	8	56	0	1.361	0.852	0.889	0.503	0.44	-0.23	-0.17	-0.99	0.634896	0.954801	0.98737	0.0336241	1	1	1	0.185741	145.6	91.2	95.1	53.8	107	17.11	35.21	15.14	18.15	9.58	133.3	169.9	73.1
FALSE	High	None	P0C2I3	TY1B-DR6	D6VSZ5; P0C2I3; sce:YDR365W-B	Transposon Ty1-DR6 Gag-Pol polyprotein [OS=Saccharomyces cerevisiae S288C]	77.727	0	11	16	21	0	3	198.5	64.39	11	21	16	97	0	1.381	1.083	1.331	3.688	0.47	0.11	0.41	1.88	0.386433	0.993743	0.495827	0.000330059	0.831971	1	1	0.0173549	83.4	65.4	80.4	222.7	60.4	11.74	10.13	1.61	21.71	13.86	82.4	69.8	63.9
FALSE	High	IsMasterProtein	P06169	PDC1	D6VY46; O00042; P06169; Q07991; Q12682; Q12686; Q12687; sce:YLR044C	Pyruvate decarboxylase isozyme 1 [OS=Saccharomyces cerevisiae S288C]	193.422	0	47	22	52	19	20	61.5	178.28	47	52	22	115	2	0.612	1.286	0.682	0.606	-0.71	0.36	-0.55	-0.72	0.122398	0.640686	0.277043	0.100619	0.406459	1	0.797801	0.39593	73	153.4	81.4	72.3	119.3	3.49	22.08	13.03	23.22	8.49	71.9	75.5	181.3
FALSE	High	IsMasterProtein	P26321	RPL5	D6W3N6; P26321; sce:YPL131W	60S ribosomal protein L5 [OS=Saccharomyces cerevisiae S288C]	72.019	0	47	12	17	11	12	33.7	65.76	47	17	12	73	0	0.475	1.446	0.684	0.466	-1.07	0.53	-0.55	-1.1	0.112182	0.649463	0.624972	0.217611	0.387078	1	1	0.64061	54.4	165.6	78.4	53.3	114.6	12.2	15.92	2.02	42.3	14.85	49.7	59.1	184.6
FALSE	Medium	IsMasterProtein	P32606	PET127	D6W283; P32606; sce:YOR017W	Putative mitochondrial translation system component PET127 [OS=Saccharomyces cerevisiae S288C]	1.744	31	1	1	1	1	1	93.4	0	1	1	1	35	0
FALSE	High	IsMasterProtein	P14743	NMT1	D6VYJ8; P14743; sce:YLR195C	Glycylpeptide N-tetradecanoyltransferase [OS=Saccharomyces cerevisiae S288C]	192.885	0	64	25	51	25	25	52.8	181.56	64	51	25	45	0	2.762	0.416	1.152	0.589	1.47	-1.26	0.2	-0.76	0.00995732	0.0218091	0.972075	0.307443	0.100359	0.20522	1	0.771777	239.1	36	99.7	51	86.6	6.06	9.88	8.13	34.33	12.97	232.7	253.5	39.3
FALSE	High	IsMasterProtein	Q03780		D6VSM0; Q03780; sce:YDR239C	Uncharacterized protein YDR239C [OS=Saccharomyces cerevisiae S288C]	123.191	0	34	21	26	21	21	86.4	89.35	34	26	21	0	0	1.469	0.441	1.268	0.796	0.55	-1.18	0.34	-0.33	0.00967906	9.27014e-05	0.0974488	0.0568401	0.098418	0.0253671	0.411649	0.270627	154.7	46.5	133.5	83.8	105.3	0.02	5.91	3.92	11.83	5.78	156.9	157	49.2
FALSE	High	IsMasterProtein	Q01448	HPC2	A2TBP6; D6VQL1; Q01448; sce:YBR215W	Histone promoter control protein 2 [OS=Saccharomyces cerevisiae S288C]	28.658	0	9	4	5	4	4	67.7	19.32	9	5	4	87	0	0.347	0.127	0.395	0.197	-1.53	-2.97	-1.34	-2.35	0.00355782	5.21862e-05	0.00755544	0.000170625	0.0552424	0.0253671	0.116542	0.0129793	94.1	34.6	107.1	53.3	271.3	36.89	13.71	5.04	13.42	1.95	125.7	73.7	32.1
FALSE	High	IsMasterProtein	P09436	ILS1	D6VPS6; P09436; sce:YBL076C	Isoleucine--tRNA ligase, cytoplasmic [OS=Saccharomyces cerevisiae S288C]	122.339	0	30	29	36	29	29	122.9	103.95	30	36	29	86	0	0.677	2.07	1.099	0.855	-0.56	1.05	0.14	-0.23	0.0495957	0.00168899	0.92865	0.529065	0.263821	0.0805374	1	1	59.7	182.6	97	75.4	88.2	14.87	11.16	4.67	9.24	9.34	54.7	67.6	201.2
FALSE	High	IsMasterProtein	P41818	GLC8	D6W0D8; P41818; sce:YMR311C	Protein GLC8 [OS=Saccharomyces cerevisiae S288C]	51.042	0	50	11	16	11	11	26.6	46.52	50	16	11	65	0	4.723	1.143	3.96	1.496	2.24	0.19	1.99	0.58	0.000997952	0.980806	0.00209225	0.234912	0.0327613	1	0.0636316	0.675776	211.6	51.2	177.4	67	44.8	8.3	10.08	18.32	24.54	2.04	226	200.9	55.4
FALSE	High	IsMasterProtein	Q06205	FPR4	D6VZ83; Q06205; sce:YLR449W	FK506-binding protein 4 [OS=Saccharomyces cerevisiae S288C]	3.702	3	4	1	1	0	1	43.9	3.17	4	1	1	72	0	1.446	2.943	1.945	1.898	0.53	1.56	0.96	0.92	0.916559	0.164948	0.552843	0.466333	1	0.659792	1	0.996671	77.5	157.8	104.3	101.7	53.6	5.85	26.26	1.42	44.74	57.53	71.2	77.4	182.3
FALSE	High	None	Q12269	TY1B-GR2	D6VUH6; Q12269; sce:YGR038C-B	Transposon Ty1-GR2 Gag-Pol polyprotein [OS=Saccharomyces cerevisiae S288C]	81.107	0	12	16	21	0	2	198.4	66.59	12	21	16	97	0	0.823	0.794	0.464	3.415	-0.28	-0.33	-1.11	1.77	0.999906	0.999786	0.949347	0.999119	1	1	1	1	61	58.8	34.4	253.1	74.1	15.42	4.46	39.15	79.75	7.12	71.9	57.8	60.3
FALSE	High	IsMasterProtein	P25567	SRO9	D6VQX8; P25567; sce:YCL037C	RNA-binding protein SRO9 [OS=Saccharomyces cerevisiae S288C]	33.647	0	24	5	7	5	5	48	29.31	24	7	5	103	0	0.986	0.857	1.306	0.899	-0.02	-0.22	0.39	-0.15	0.999998	0.900151	0.542659	0.713331	1	1	1	1	98.6	85.8	130.7	89.9	100	15.32	4.15	7.43	23.77	3.16	90.3	112.3	90.2
FALSE	High	IsMasterProtein	P16521	YEF3	D6VYP7; O93815; P16521; Q06558; sce:YLR249W	Elongation factor 3A [OS=Saccharomyces cerevisiae S288C]	381.721	0	54	53	128	40	40	115.9	419.64	54	128	53	129	15	1.219	0.897	1.221	0.793	0.29	-0.16	0.29	-0.33	0.401437	0.854948	0.393927	0.293567	0.854168	1	1	0.76142	122.2	89.9	122.4	79.5	100.3	15.3	13.1	2.91	8.88	2.33	110.6	137.4	99.5
FALSE	High	IsMasterProtein	P38879	EGD2	D3DLE1; P38879; sce:YHR193C	Nascent polypeptide-associated complex subunit alpha [OS=Saccharomyces cerevisiae S288C]	9.774	0	16	3	3	3	3	18.7	5.53	16	3	3	58	0	0.709	0.354	0.609	0.414	-0.5	-1.5	-0.71	-1.27	0.455632	0.00798042	0.18153	0.0179762	0.904181	0.138811	0.60633	0.131559	114.3	57	98.2	66.8	161.2	7.76	19.6	22.86	24.74	8.52	130	116.4	53.4
FALSE	High	IsMasterProtein	Q08979	KEL3	D6W3A7; Q08979; sce:YPL263C	Kelch repeat-containing protein 3 [OS=Saccharomyces cerevisiae S288C]	27.843	0	9	6	6	6	6	75.4	18.03	9	6	6	3	0	1.307	0.848	1.029	0.59	0.39	-0.24	0.04	-0.76	0.999572	0.999959	1	0.62835	1	1	1	1	130	84.3	102.3	58.7	99.4	2.86	10.6	0.81	84.17	9.3	134.6	140.1	96
FALSE	High	IsMasterProtein	Q02629	NUP100	D6VXL9; Q02629; sce:YKL068W	Nucleoporin NUP100/NSP100 [OS=Saccharomyces cerevisiae S288C]	18.537	0	7	5	6	4	4	99.9	16.63	7	6	5	116	1	0.614	0.499	0.42	1.292	-0.7	-1	-1.25	0.37	0.690043	0.382848	0.209879	0.999999	1	1	0.657086	1	78.7	64	53.9	165.8	128.3	14.82	3.39	5.42	47.36	8.11	86.8	70.4	65.1
FALSE	High	IsMasterProtein	P21576	VPS1	D6VXT7; P21576; sce:YKR001C	Vacuolar protein sorting-associated protein 1 [OS=Saccharomyces cerevisiae S288C]	68.452	0	20	14	17	13	13	78.7	49.18	20	17	14	125	0	1.308	1.165	1.281	0.902	0.39	0.22	0.36	-0.15	0.53477	0.902598	0.606402	0.999974	0.976716	1	1	1	118.4	105.4	115.9	81.6	90.5	14.9	5.4	0.87	25.72	11.99	130.6	105.7	108.7
FALSE	High	IsMasterProtein	P13382	POL1	D6W177; P13382; sce:YNL102W	DNA polymerase alpha catalytic subunit A [OS=Saccharomyces cerevisiae S288C]	26.83	0	7	7	7	7	7	166.7	20.54	7	7	7	124	0	0.698	0.9	0.846	0.53	-0.52	-0.15	-0.24	-0.92	0.997629	0.999994	0.999941	0.46535	1	1	1	0.996671	90.1	116.3	109.2	68.4	129.1	11.6	8.76	5.42	79.3	2	104.7	88.9	132.4
FALSE	High	IsMasterProtein	Q06685	VIP1	D6VZ44; Q06685; sce:YLR410W	Inositol hexakisphosphate and diphosphoinositol-pentakisphosphate kinase [OS=Saccharomyces cerevisiae S288C]	143.763	0	29	32	40	32	32	129.7	117.62	29	40	32	98	0	2.742	1.205	2.466	1.593	1.46	0.27	1.3	0.67	0.154352	0.992868	0.222545	0.99563	0.472934	1	0.681878	1	162.9	71.6	146.5	94.7	59.4	10.46	11.11	4.15	49.5	14.13	183	157.8	80.8
FALSE	Medium	IsMasterProtein	Q12150	CSF1	D6VY87; Q12150; sce:YLR087C	Protein CSF1 [OS=Saccharomyces cerevisiae S288C]	1.689	33	1	1	1	1	1	338	0	1	1	1	21	0	0.522	0.672	0.697	0.651	-0.94	-0.57	-0.52	-0.62	0.475578	0.843689	0.886576	0.409875	0.914689	1	1	0.914378	68.9	88.7	92	85.9	132	12.4	7.38	10.98	45.44	28.56	64.5	77	95.5
FALSE	High	IsMasterProtein	Q12417	PRP46	D6W3L8; Q12417; sce:YPL151C	Pre-mRNA-splicing factor PRP46 [OS=Saccharomyces cerevisiae S288C]	4.393	1	2	1	1	1	1	50.7	2.31	2	1	1	40	0	0.379	0.486	0.436	0.374	-1.4	-1.04	-1.2	-1.42	0.174202	0.398419	0.281555	0.254364	0.504177	1	0.803212	0.704658	71.8	92.1	82.6	70.8	189.5	12.85	13.22	10.03	63.22	30.71	75	62.5	96.4
FALSE	High	IsMasterProtein	P47117	ARP3	D6VWN6; P47117; sce:YJR065C	Actin-related protein 3 [OS=Saccharomyces cerevisiae S288C]	58.681	0	36	12	13	12	12	49.5	40.83	36	13	12	54	0	1.926	0.729	1.659	0.841	0.95	-0.46	0.73	-0.25	0.500268	0.938333	0.717122	0.583387	0.947658	1	1	1	157.9	59.8	136	68.9	82	5.04	6.3	11.89	50.67	5.23	173.7	161.7	66.3
FALSE	High	IsMasterProtein	P53950	VAC7	D6W1C5; P53950; sce:YNL054W	Vacuolar segregation protein 7 [OS=Saccharomyces cerevisiae S288C]	42.329	0	9	6	7	6	6	128.1	28.6	9	7	6	100	0	0.842	0.32	0.742	0.336	-0.25	-1.65	-0.43	-1.57	0.987058	0.0385643	0.887833	0.0902555	1	0.280201	1	0.369052	136.9	52	120.8	54.7	162.7	4.1	2.68	13.2	50.76	9.72	138.8	131	52.2
FALSE	High	None	Q03855	TY1B-DR1	D6VS84; Q03855; sce:YDR098C-B	Transposon Ty1-DR1 Gag-Pol polyprotein [OS=Saccharomyces cerevisiae S288C]	75.238	0	11	15	20	0	2	198.5	62.06	11	20	15	97	0	0.823	0.794	0.464	3.415	-0.28	-0.33	-1.11	1.77	0.999906	0.999786	0.949347	0.999119	1	1	1	1	61	58.8	34.4	253.1	74.1	15.42	4.46	39.15	79.75	7.12	71.9	57.8	60.3
FALSE	Medium	IsMasterProtein	P40107	VRG4	D6VVB0; P40107; sce:YGL225W	GDP-mannose transporter 1 [OS=Saccharomyces cerevisiae S288C]	1.69	33	2	1	1	1	1	37	2.58	2	1	1	52	0	0.522	1.602	0.779	1.248	-0.94	0.68	-0.36	0.32	0.536386	0.787001	0.978987	0.998772	0.976716	1	1	1	49.1	150.7	73.3	117.4	94	47.35	32	19.4	28.96	48.48	68.1	33.9	185.7
FALSE	High	IsMasterProtein	P09938	RNR2	D6VWF6; P09938; sce:YJL026W	Ribonucleoside-diphosphate reductase small chain 1 [OS=Saccharomyces cerevisiae S288C]	55.344	0	29	12	15	12	12	46.1	44.89	29	15	12	72	0	1.237	0.398	0.739	0.464	0.31	-1.33	-0.44	-1.11	0.385581	0.000363265	0.134836	0.000495623	0.831971	0.0353381	0.50224	0.0173725	173.6	55.9	103.7	65.2	140.4	3.77	2.2	4.02	18.03	0.52	183.8	174.3	56.8
FALSE	High	IsMasterProtein	Q05672	RBS1	D6VRG4; Q05672; Q06896; Q07619; Q870H2; sce:YDL189W	RNA-binding suppressor of PAS kinase protein 1 [OS=Saccharomyces cerevisiae S288C]	43.312	0	22	11	14	11	11	51.9	36.71	22	14	11	32	0	1.063	0.849	1.259	7.394	0.09	-0.24	0.33	2.89	0.999996	0.999485	0.99738	0.113571	1	1	1	0.419762	47.8	38.2	56.6	332.4	45	19.09	10.57	16.2	65.91	11.72	53	40.4	39.8
FALSE	High	IsMasterProtein	Q12000	TMA46	D6W2F2; Q12000; sce:YOR091W	Translation machinery-associated protein 46 [OS=Saccharomyces cerevisiae S288C]	8.451	0	9	3	3	3	3	39.5	7.99	9	3	3	37	0	2.37	1.378	1.877	1.236	1.24	0.46	0.91	0.31	0.0336079	0.658786	0.129431	0.516321	0.204315	1	0.491828	1	151.8	88.3	120.3	79.2	64.1	13.36	2.01	2.78	30.7	31.16	135.4	163.6	85.3
FALSE	High	IsMasterProtein	Q02326	RPL6A	D6VZA0; Q02326; sce:YML073C	60S ribosomal protein L6-A [OS=Saccharomyces cerevisiae S288C]	28.396	0	34	6	9	1	1	19.9	22.82	34	9	6	67	0	1.354	3.82	1.796	1.492	0.44	1.93	0.84	0.58	0.903279	0.0233985	0.452163	0.49381	1	0.214892	1	1	74.5	210.2	98.8	82	55	11.29	24.66	4.06	24.65	9.68	66.6	78.2	242.9
FALSE	Low	IsMasterProtein	P32561	RPD3	D6W0L7; P32561; sce:YNL330C	Histone deacetylase RPD3 [OS=Saccharomyces cerevisiae S288C]	0.902	91	4	1	1	1	1	48.9	2.49	4	1	1	236	0
FALSE	High	None	Q12470	TY1A-NL2	D6W1C4; Q07115; Q12470; sce:YNL054W-A	Transposon Ty1-NL2 Gag polyprotein [OS=Saccharomyces cerevisiae S288C]	62.446	0	33	11	16	0	2	49.2	50.16	33	16	11	21	0	0.823	0.794	0.464	3.415	-0.28	-0.33	-1.11	1.77	0.999906	0.999786	0.949347	0.999119	1	1	1	1	61	58.8	34.4	253.1	74.1	15.42	4.46	39.15	79.75	7.12	71.9	57.8	60.3
FALSE	Medium	IsMasterProtein	P33401	PGM1	D6VX68; P33401; sce:YKL127W	Phosphoglucomutase 1 [OS=Saccharomyces cerevisiae S288C]	1.77	28	2	1	1	1	1	63.1	2.75	2	1	1	82	0	0.605	1.043	0.642	0.556	-0.73	0.06	-0.64	-0.85	0.415479	0.999967	0.525914	0.289843	0.857007	1	1	0.75913	77.7	134	82.5	71.4	128.5	23.66	14.73	4.31	33.04	35.35	98.2	70	158.8
FALSE	High	None	P54113	ADE16	D6VY30; E9PAG6; P54113; sce:YLR028C	Bifunctional purine biosynthesis protein ADE16 [OS=Saccharomyces cerevisiae S288C]	14.301	0	4	2	3	0	2	65.2	9.28	4	3	2	73	0	1.016	0.671	1.054	0.654	0.02	-0.58	0.08	-0.61	0.999999	0.364119	0.99965	0.18742	1	1	1	0.594878	106.5	70.3	110.5	68.6	104.9	0.22	12.24	18.65	23.76	26.22	109.1	108.7	78.4
FALSE	High	IsMasterProtein	Q01976	YSA1	D6VQB0; Q01976; sce:YBR111C	ADP-ribose pyrophosphatase [OS=Saccharomyces cerevisiae S288C]	3.252	3	13	1	1	1	1	26.1	3.37	13	1	1	41	0
FALSE	High	IsMasterProtein	P41805	RPL10	D6VY76; P41805; sce:YLR075W	60S ribosomal protein L10 [OS=Saccharomyces cerevisiae S288C]	60.742	0	67	15	19	15	15	25.3	61.83	67	19	15	65	0	0.308	1.042	0.421	0.571	-1.7	0.06	-1.25	-0.81	0.151436	0.999998	0.373764	0.968923	0.465242	1	0.974925	1	44.4	150.4	60.8	82.4	144.3	10.67	16.24	2.92	79.6	3.6	43.3	37.3	152.6
FALSE	High	None	Q12501	TY2B-OR2	D6W338; Q12501	Transposon Ty2-OR2 Gag-Pol polyprotein [OS=Saccharomyces cerevisiae S288C]	17.136	0	4	5	6	0	5	202	16.45	4	6	5	97	0	2.392	1.145	2.81	3.232	1.26	0.2	1.49	1.69	0.0956673	0.994179	0.0460419	0.0123355	0.355734	1	0.276497	0.107375	123.9	59.3	145.6	167.4	51.8	10.35	8.48	17.49	46.9	2.08	120.5	104.1	50.5
FALSE	High	IsMasterProtein	P27801	PEP3	D6VYE3; P27801; sce:YLR148W	Vacuolar membrane protein PEP3 [OS=Saccharomyces cerevisiae S288C]	3.529	3	2	1	1	1	1	107.3	2.35	2	1	1	104	0
FALSE	High	IsMasterProtein	P40016	RPN3	D3DLS0; P40016; sce:YER021W	26S proteasome regulatory subunit RPN3 [OS=Saccharomyces cerevisiae S288C]	4.442	1	2	1	1	1	1	60.4	2.68	2	1	1	53	0	0.203	1.057	0.269	0.342	-2.3	0.08	-1.9	-1.55	0.0778504	0.999993	0.157	0.286102	0.336279	1	0.558491	0.754715	33.5	174.6	44.4	56.5	165.1	15.92	40.45	13.44	66.44	34.13	38.6	30.8	241.2
FALSE	High	IsMasterProtein	Q02199	NUP49	D6VTY0; Q02199; sce:YGL172W	Nucleoporin NUP49/NSP49 [OS=Saccharomyces cerevisiae S288C]	2.268	5	2	1	1	1	1	49.1	2.67	2	1	1	86	0	0.26	0.148	0.301	0.549	-1.94	-2.76	-1.73	-0.86	0.0535808	0.00915424	0.0876651	0.606226	0.270993	0.142381	0.385928	1	62.6	35.6	72.4	132.2	240.6	14.91	16.28	17.61	57.51	18.73	63.8	51.6	36.6
FALSE	Medium	IsMasterProtein	P36024	SIS2	D6VXD3; P36024; sce:YKR072C	Phosphopantothenoylcysteine decarboxylase subunit SIS2 [OS=Saccharomyces cerevisiae S288C]	1.901	17	1	1	1	1	1	62.4	1.72	1	1	1	136	0	3.083	0.872	2.066	1.367	1.62	-0.2	1.05	0.45	0.00818472	0.972559	0.0617931	0.611462	0.0895643	1	0.332852	1	202.9	57.4	136	89.9	65.8	19.38	15.48	0.9	24.65	25.76	250.1	189.8	55.2
FALSE	High	IsMasterProtein	P38219	OLA1	D6VQ27; P38219; sce:YBR025C	Obg-like ATPase 1 [OS=Saccharomyces cerevisiae S288C]	75.127	0	45	16	18	16	16	44.1	58.88	45	18	16	40	0	2.787	1.459	2.24	0.908	1.48	0.54	1.16	-0.14	0.0186188	0.56548	0.059011	0.980816	0.144547	1	0.329144	1	173.9	91	139.8	56.6	62.4	2.57	23.66	6.9	31.89	19.95	182.5	176	79.2
FALSE	High	IsMasterProtein	P24279	MCM3	D3DLL7; P24279; sce:YEL032W	DNA replication licensing factor MCM3 [OS=Saccharomyces cerevisiae S288C]	8.162	0	4	2	2	2	2	107.5	6.87	4	2	2	161	0	0.304	0.409	0.299	0.606	-1.72	-1.29	-1.74	-0.72	0.0798075	0.224001	0.0749359	0.449017	0.340206	0.798614	0.367939	0.978977	55.2	74.1	54.2	109.8	181.3	5.28	21.12	20.5	35.87	26.97	52.3	56.4	84.7
FALSE	High	IsMasterProtein	P38796	PPE1	D3DL25; P38796; sce:YHR075C	Protein phosphatase methylesterase 1 [OS=Saccharomyces cerevisiae S288C]	5.004	1	4	1	1	1	1	44.9	3.57	4	1	1	68	0	0.915	0.734	1.22	1.015	-0.13	-0.45	0.29	0.02	0.994118	0.538856	0.854485	0.999968	1	1	1	1	89.8	72	119.8	99.6	98.2	18.08	6.95	4.35	22.15	26.44	78.1	101	74.8
FALSE	High	IsMasterProtein	Q12265	PRS5	D6W206; Q12265; sce:YOL061W	Ribose-phosphate pyrophosphokinase 5 [OS=Saccharomyces cerevisiae S288C]	43.526	0	18	8	12	8	8	53.5	32.75	18	12	8	88	0	0.881	0.847	0.875	0.685	-0.18	-0.24	-0.19	-0.55	0.999994	0.999979	0.999993	0.969096	1	1	1	1	103.6	99.6	102.9	80.5	117.6	4.76	1.2	2	157.09	3.64	36.8	39.4	37
FALSE	High	IsMasterProtein	P38088	GRS1	D6VQB9; P38088; sce:YBR121C	Glycine--tRNA ligase 1, mitochondrial [OS=Saccharomyces cerevisiae S288C]	9.021	0	8	4	5	4	4	78.1	9.26	8	5	4	110	0	0.706	1.331	0.887	0.832	-0.5	0.41	-0.17	-0.27	0.246532	0.407984	0.946103	0.986434	0.62531	1	1	1	69.7	131.4	87.5	82.1	98.7	8.34	4.76	15.9	21.39	13.55	64.9	73	125.5
FALSE	High	IsMasterProtein	P53852	CRS1	D6W0U6; P53852; sce:YNL247W	Cysteine--tRNA ligase [OS=Saccharomyces cerevisiae S288C]	5.03	1	4	3	3	3	3	87.5	6.69	4	3	3	80	0	0.987	0.706	0.724	0.47	-0.02	-0.5	-0.47	-1.09	1	0.983399	0.988031	0.317949	1	1	1	0.787335	119.8	85.6	87.8	57.1	121.4	15.12	0.52	23.76	67.56	40.47	111.7	138.5	89.2
FALSE	High	IsMasterProtein	P46675	STU2	D6VY47; P46675; sce:YLR045C	Protein STU2 [OS=Saccharomyces cerevisiae S288C]	7.191	0	2	2	2	2	2	100.9	5.33	2	2	2	65	0	1.33	0.56	1.277	0.815	0.41	-0.84	0.35	-0.3	0.845871	0.289685	0.908013	1	1	0.928935	1	1	138.3	58.2	132.8	84.7	104	5.02	1.84	7.7	46.43	21.62	136.8	127.4	56.3
FALSE	High	IsMasterProtein	Q3E757	RPL11B	D6VUL7; P06380; Q3E757; sce:YGR085C	60S ribosomal protein L11-B [OS=Saccharomyces cerevisiae S288C]	14.918	0	20	4	5	0	4	19.7	15.22	20	5	4	72	0	0.532	1.523	0.749	0.62	-0.91	0.61	-0.42	-0.69	0.439518	0.772544	0.934319	0.525939	0.892236	1	1	1	61.1	174.9	86	71.2	114.8	13.19	25.29	9.87	44.07	23.16	56	67.5	210.7
FALSE	High	None	Q99260	YPT6	D6VYQ8; Q99260; sce:YLR262C	GTP-binding protein YPT6 [OS=Saccharomyces cerevisiae S288C]	2.888	4	5	1	1	0	1	24.4	3.28	5	1	1	92	0	0.282	0.574	0.408	0.342	-1.83	-0.8	-1.29	-1.55	0.0127756	0.346039	0.0684596	0.0137182	0.11037	1	0.352736	0.112634	52.3	106.3	75.6	63.3	185.2	3.06	13.2	16.54	29.64	21.64	52.3	54.6	119.2
FALSE	Medium	IsMasterProtein	P41058	RPS29B	A2TBP5; D6VRT5; P05761; P41058; sce:YDL061C	40S ribosomal protein S29-B [OS=Saccharomyces cerevisiae S288C]	1.264	63	18	1	1	1	1	6.7	0	18	1	1	52	0	0.958	1.378	1.517	2.242	-0.06	0.46	0.6	1.17	1	0.999311	0.997602	0.568059	1	1	1	1	67.2	96.6	106.4	157.3	70.1	13.11	14.14	31.76	149.93	63.91	21.6	26.1	37.8
FALSE	High	IsMasterProtein	P38011	ASC1	D6VZT9; P38011; Q6LAA5; sce:YMR116C	Guanine nucleotide-binding protein subunit beta-like protein [OS=Saccharomyces cerevisiae S288C]	53.433	0	34	8	15	8	8	34.8	54.31	34	15	8	179	0	0.708	1.035	0.778	0.764	-0.5	0.05	-0.36	-0.39	0.630691	0.99998	0.846391	0.608367	1	1	1	1	81	118.4	89	87.4	114.4	15.33	36.91	6.94	25.15	9.59	73.2	91	155.9
FALSE	High	IsMasterProtein	P40217	TIF34	D6VZW8; P40217; sce:YMR146C	Eukaryotic translation initiation factor 3 subunit I [OS=Saccharomyces cerevisiae S288C]	12.811	0	10	2	2	2	2	38.7	8.92	10	2	2	83	0	0.685	0.767	0.724	1.316	-0.55	-0.38	-0.47	0.4	0.461668	0.755645	0.605068	0.751079	0.906762	1	1	1	70.9	79.4	75	136.3	103.6	22.31	12.64	3.68	28.33	14.73	58.7	80.7	84.3
FALSE	High	IsMasterProtein	P25302	SWI4	D3DM17; P25302; sce:YER111C	Regulatory protein SWI4 [OS=Saccharomyces cerevisiae S288C]	2.315	5	2	1	1	1	1	123.7	3.52	2	1	1	112	0	0.458	0.523	0.615	0.694	-1.13	-0.93	-0.7	-0.53	0.0662473	0.132979	0.311354	0.555424	0.302056	0.569625	0.847739	1	65.3	74.5	87.5	98.9	142.5	21.77	8.92	5.37	15.3	34.09	59.8	81.5	84.9
FALSE	High	IsMasterProtein	P38840	ARO9	D3DL86; P38840; P87291; sce:YHR137W	Aromatic amino acid aminotransferase 2 [OS=Saccharomyces cerevisiae S288C]	8.902	0	4	1	1	1	1	58.5	6.68	4	1	1	91	0	0.513	0.805	0.581	0.811	-0.96	-0.31	-0.78	-0.3	0.974674	0.999865	0.989529	0.800118	1	1	1	1	65.5	102.8	74.1	103.6	127.7	20.47	15.92	19.1	82.72	10.15	59.1	79.2	120.3
FALSE	High	IsMasterProtein	Q03957	CTK1	D6VX57; Q03957; sce:YKL139W	CTD kinase subunit alpha [OS=Saccharomyces cerevisiae S288C]	11.779	0	7	3	3	3	3	60.5	9	7	3	3	172	0
FALSE	High	IsMasterProtein	P47116	PTK2	D6VWN0; E9P962; P47116; sce:YJR059W	Serine/threonine-protein kinase PTK2/STK2 [OS=Saccharomyces cerevisiae S288C]	37.55	0	14	10	13	9	10	91.3	37.79	14	13	10	77	0	2.29	1.579	1.917	1.03	1.2	0.66	0.94	0.04	0.00133782	0.0366596	0.00563621	0.999776	0.0349086	0.271722	0.106164	1	154.4	106.4	129.2	69.4	67.4	7.18	1.32	8.78	15.59	11.68	167.4	151.2	108.6
FALSE	High	IsMasterProtein	P06208	LEU4	D6W175; P06208; sce:YNL104C	2-isopropylmalate synthase [OS=Saccharomyces cerevisiae S288C]	15.514	0	8	6	6	2	6	68.4	11.18	8	6	6	44	0	1.834	1.997	1.604	3.656	0.88	1	0.68	1.87	0.915439	0.866929	0.967769	0.192706	1	1	1	0.600053	92.2	100.3	80.6	183.7	50.2	25.75	5.15	3.33	107.81	29.27	52.2	75.4	70.8
FALSE	High	IsMasterProtein	P40477	NUP159	D6VVH2; P40477; sce:YIL115C	Nucleoporin NUP159 [OS=Saccharomyces cerevisiae S288C]	135.735	0	23	23	31	23	23	158.8	103.89	23	31	23	154	0	0.849	0.507	0.847	0.554	-0.24	-0.98	-0.24	-0.85	0.506433	0.00111543	0.496608	0.00281674	0.952359	0.0758863	1	0.0481508	113.1	67.6	112.9	73.9	133.3	3.12	7.71	9.33	10.67	3.86	111.6	116.6	64.5
FALSE	High	None	Q03483	TY2A-DR2	D6VSJ2; Q03483; sce:YDR210W-A	Transposon Ty2-DR2 Gag polyprotein [OS=Saccharomyces cerevisiae S288C]	17.136	0	15	5	6	0	5	49.8	16.45	15	6	5	21	0	2.392	1.145	2.81	3.232	1.26	0.2	1.49	1.69	0.0956673	0.994179	0.0460419	0.0123355	0.355734	1	0.276497	0.107375	123.9	59.3	145.6	167.4	51.8	10.35	8.48	17.49	46.9	2.08	120.5	104.1	50.5
FALSE	High	IsMasterProtein	Q04053	SNX41	D6VT55; Q04053; sce:YDR425W	Sorting nexin-41 [OS=Saccharomyces cerevisiae S288C]	3.957	3	2	1	1	1	1	70.7	2.76	2	1	1	59	0
FALSE	High	IsMasterProtein	P00958	MES1	D6VV43; P00958; sce:YGR264C	Methionine--tRNA ligase, cytoplasmic [OS=Saccharomyces cerevisiae S288C]	52.768	0	15	9	17	9	9	85.6	48.02	15	17	9	81	0	0.705	0.849	0.745	0.941	-0.5	-0.24	-0.42	-0.09	0.866877	0.993814	0.927325	0.999245	1	1	1	1	79.4	95.7	83.9	106	112.7	15.39	0.72	3.13	60.01	7.58	65.8	81.8	88.9
FALSE	High	IsMasterProtein	P53691	CPR6	D6VYL7; P53691; Q6Q5K7; sce:YLR216C	Peptidyl-prolyl cis-trans isomerase CPR6 [OS=Saccharomyces cerevisiae S288C]	4.212	3	2	1	1	1	1	42	2.83	2	1	1	40	0	0.866	0.357	1.2	0.802	-0.21	-1.48	0.26	-0.32	0.975249	0.0179586	0.937056	0.877225	1	0.192678	1	1	107.9	44.5	149.5	99.9	124.6	0.82	12.73	19.88	3.15	37.85	114.8	116.1	43.5
FALSE	High	IsMasterProtein	P36069	PMU1	D6VX67; E9P8Y9; P36069; sce:YKL128C	Probable phosphoglycerate mutase PMU1 [OS=Saccharomyces cerevisiae S288C]	36.211	0	32	8	11	7	7	33.8	32.58	32	11	8	8	1	1.333	0.396	1.517	1.388	0.42	-1.33	0.6	0.47	0.98387	0.402135	0.928093	0.999966	1	1	1	1	114.4	34	130.1	119.1	85.8	2.17	1.38	0.93	60.6	2.4	120.5	116.9	34.9
FALSE	High	IsMasterProtein	P08964	MYO1	D3DKX0; P08964; sce:YHR023W	Myosin-1 [OS=Saccharomyces cerevisiae S288C]	2.28	5	0	1	1	1	1	223.5	1.98	0	1	1	110	0	18.096	8.499	13.51	10.215	4.18	3.09	3.76	3.35	0.0213788	0.0865323	0.0361832	0.0528796	0.153526	0.437617	0.272266	0.255288	204.3	95.9	152.5	115.3	11.3	0.6	17.94	5.79	39.87	75.29	202.5	200.8	107.6
FALSE	High	IsMasterProtein	P53235	eIF2A	D6VUI9; P53235; Q45U32; sce:YGR054W	Eukaryotic translation initiation factor 2A [OS=Saccharomyces cerevisiae S288C]	148.635	0	45	24	43	24	24	71.3	141.63	45	43	24	74	0	3.762	1.29	2.425	1.737	1.91	0.37	1.28	0.8	0.000377665	0.556471	0.0044806	0.0150074	0.0217506	1	0.0887622	0.118106	182.2	62.5	117.4	84.1	48.4	4.47	11.91	2.82	22.39	13.85	174.2	185.6	67.1
FALSE	High	IsMasterProtein	P32892	DRS1	D6VXZ4; P32892; sce:YLL008W	ATP-dependent RNA helicase DRS1 [OS=Saccharomyces cerevisiae S288C]	12.809	0	5	3	3	3	3	84.8	9.79	5	3	3	76	0	1.962	3.464	2.648	1.78	0.97	1.79	1.4	0.83	0.358928	0.0402739	0.114374	0.157718	0.79157	0.287046	0.448517	0.530515	91.6	161.6	123.5	83	46.7	8.47	1.33	1.13	45.27	40.55	91.5	81.1	153.5
FALSE	High	IsMasterProtein	P00899	TRP2	D3DLZ7; P00899; sce:YER090W	Anthranilate synthase component 1 [OS=Saccharomyces cerevisiae S288C]	6.034	0	3	1	1	1	1	56.7	4.68	3	1	1	65	0	2.78	1.971	2.693	1.765	1.47	0.98	1.43	0.82	0.0195297	0.109544	0.0226118	0.198277	0.145612	0.510825	0.204574	0.609757	139.9	99.2	135.6	88.9	50.3	14.02	1.01	1.43	13.16	6.5	135.9	165.8	107.2
FALSE	Low	IsMasterProtein	P38338		D6VQQ6; P38338; sce:YBR259W	Uncharacterized protein YBR259W [OS=Saccharomyces cerevisiae S288C]	1.067	74	2	1	1	1	1	80.4	0	2	1	1	0	0
FALSE	High	IsMasterProtein	Q12523		D6W3C4; Q12523; sce:YPL247C	WD repeat-containing protein YPL247C [OS=Saccharomyces cerevisiae S288C]	13.785	0	8	3	4	3	3	57.3	9.46	8	4	3	1	0	0.527	0.639	0.769	1.112	-0.92	-0.65	-0.38	0.15	0.0102993	0.0606973	0.368748	0.991262	0.101145	0.360252	0.967332	1	64.4	78.1	94	135.9	122.2	6.98	1.57	14.3	9.51	5.19	60.2	66.5	77.5
FALSE	High	None	P0C2I4	TY1A-H	D3DLG7; P0C2I4; sce:YHR214C-C	Transposon Ty1-H Gag polyprotein [OS=Saccharomyces cerevisiae S288C]	66.609	0	35	12	17	0	2	53.3	53.8	35	17	12	21	0	0.823	0.794	0.464	3.415	-0.28	-0.33	-1.11	1.77	0.999906	0.999786	0.949347	0.999119	1	1	1	1	61	58.8	34.4	253.1	74.1	15.42	4.46	39.15	79.75	7.12	71.9	57.8	60.3
FALSE	High	IsMasterProteinCandidate	P0C2I6	TY1B-LR3	D6VYM8; P0C2I6; sce:YLR227W-B	Transposon Ty1-LR3 Gag-Pol polyprotein [OS=Saccharomyces cerevisiae S288C]	86.433	0	13	18	23	0	3	198.3	72.17	13	23	18	97	0	1.376	1.132	1.33	3.49	0.46	0.18	0.41	1.8	0.410533	0.960556	0.511023	0.000465365	0.856085	1	1	0.0173549	84.4	69.5	81.6	214.1	61.4	9.7	10.13	2.93	22.23	14.12	82.4	71.8	68
FALSE	High	None	P32793	YSC84	D3DKW1; P32793; sce:YHR016C	Protein YSC84 [OS=Saccharomyces cerevisiae S288C]	3.87	3	3	2	3	0	2	50.9	5.7	3	3	2	49	0	6.561	8.679	7.707	8.696	2.71	3.12	2.95	3.12	0.0278947	0.0145495	0.0190671	0.0144867	0.181079	0.174625	0.185447	0.114916	107.7	142.5	126.5	142.8	16.4	21.74	35.82	19.46	22.1	71.53	133.2	97.7	195.4
FALSE	High	IsMasterProtein	P21182	SPE2	D6W216; P21182; sce:YOL052C	S-adenosylmethionine decarboxylase proenzyme [OS=Saccharomyces cerevisiae S288C]	6.505	0	6	3	4	3	3	46.2	8.2	6	4	3	56	0	7.187	2.939	4.797	4.182	2.85	1.56	2.26	2.06	0.0501219	0.393665	0.129456	0.0672767	0.265392	1	0.491828	0.304334	200.7	82.1	134	116.8	27.9	24.87	19.95	8.35	87.08	13.05	199.8	140.1	78.8
FALSE	High	IsMasterProtein	P34730	BMH2	A2TBP2; D6VS86; P34730; Q06HN5; sce:YDR099W	Protein BMH2 [OS=Saccharomyces cerevisiae S288C]	16.326	0	14	3	4	0	3	31	11.68	14	4	3	176	0	0.578	0.611	0.668	1.047	-0.79	-0.71	-0.58	0.07	0.991526	0.99479	0.997942	0.879401	1	1	1	1	76.2	80.6	88.1	138.2	131.9	4.99	5.53	1.93	81.58	12.05	78	83.6	82.1
FALSE	High	IsMasterProtein	P53866	SQS1	D6W0W6; P53866; sce:YNL224C	Protein SQS1 [OS=Saccharomyces cerevisiae S288C]	24.058	0	8	6	7	6	6	86.9	13.61	8	7	6	55	0	0.968	0.793	0.936	1.229	-0.05	-0.33	-0.1	0.3	1	0.993984	0.999986	0.829938	1	1	1	1	98.7	81	95.5	125.4	102.1	0.74	19.81	2.15	81.87	42.8	81.7	80.8	76.7
FALSE	Medium	IsMasterProtein	Q12504	RKM4	D6VSN7; Q07015; Q12504; sce:YDR257C	Ribosomal lysine N-methyltransferase 4 [OS=Saccharomyces cerevisiae S288C]	1.831	21	1	1	1	1	1	57.3	2.53	1	1	1	33	0	0.492	1.301	0.722	0.852	-1.02	0.38	-0.47	-0.23	0.196629	0.897216	0.797598	0.985526	0.550514	1	1	1	54	142.8	79.2	93.6	109.8	22.54	33.58	1.98	4.43	37.15	67.4	48.9	193.3
FALSE	Low	IsMasterProtein	P40035	PIC2	D3DLV5; P40035; sce:YER053C	Mitochondrial phosphate carrier protein 2 [OS=Saccharomyces cerevisiae S288C]	1.111	71	4	1	1	1	1	33.5	0	4	1	1	80	0	37.698	6.292	18.639	14.263	5.24	2.65	4.22	3.83									283.7	47.4	140.3	107.4	7.5	18.49	6.75	49.3	39.04		331.5	254.8	46.2
FALSE	Medium	IsMasterProtein	Q03305	RMT2	D6VT90; Q03305; sce:YDR465C	Protein arginine N-methyltransferase 2 [OS=Saccharomyces cerevisiae S288C]	1.477	46	1	1	1	1	1	47.4	2.08	1	1	1	41	0	0.785	1.165	0.784	0.828	-0.35	0.22	-0.35	-0.27	0.704443	0.932528	0.702799	0.397452	1	1	1	0.898962	82.8	123	82.8	87.5	105.6	21.88	6.92	4.06	23.18	12.25	72.9	99.6	132.8
FALSE	High	IsMasterProtein	P43592	FAR7	D6VTN8; P43592; sce:YFR008W	Factor arrest protein 7 [OS=Saccharomyces cerevisiae S288C]	7.491	0	10	2	2	2	2	25.9	6.8	10	2	2	43	0	7.959	3.245	3.972	2.54	2.99	1.7	1.99	1.34									231.7	94.5	115.6	73.9	29.1	15.91	10.3	23.25	50.54		272.9	217.7	106.9
FALSE	High	IsMasterProtein	Q03656	SKY1	D6W041; Q03656; sce:YMR216C	Serine/threonine-protein kinase SKY1 [OS=Saccharomyces cerevisiae S288C]	61.249	0	16	12	13	12	12	83.2	40.44	16	13	12	144	0	2.014	1.074	1.706	1.227	1.01	0.1	0.77	0.29	0.00290439	0.981264	0.0134461	0.6458	0.0552424	1	0.156496	1	158.3	84.4	134.1	96.4	78.6	15.34	6.24	12.25	13.49	1.41	143.4	178.3	89.1
FALSE	Medium	IsMasterProtein	P33734	HIS7	D6VQP4; P33734; sce:YBR248C	Imidazole glycerol phosphate synthase hisHF [OS=Saccharomyces cerevisiae S288C]	1.331	52	3	1	1	1	1	61	2.61	3	1	1	45	0	0.782	1.069	0.954	1.079	-0.36	0.1	-0.07	0.11	0.859804	0.999491	0.999907	0.936634	1	1	1	1	79.5	108.7	97.1	109.7	101.7	14.4	3.93	15.15	38.92	9.48	68.3	83.8	100.6
FALSE	High	IsMasterProtein	P32909	SMY2	D6VQG8; P32909; sce:YBR172C	Protein SMY2 [OS=Saccharomyces cerevisiae S288C]	205.063	0	49	34	56	34	34	81.3	185.68	49	56	34	29	0	2.532	1.014	3.26	5.08	1.34	0.02	1.7	2.34	0.170093	1	0.0670215	0.0177814	0.498564	1	0.351634	0.130967	101.4	40.6	130.6	203.5	40.1	10.4	8.7	2.95	50.9	5.53	105	90.6	36.7
FALSE	Low	IsMasterProtein	Q08986	SAM3	D6W396; Q08986; Q7LGU1; sce:YPL274W	S-adenosylmethionine permease SAM3 [OS=Saccharomyces cerevisiae S288C]	0.892	92	1	1	1	1	1	64.3	0	1	1	1	48	0	0.738	1.352	0.776	1.042	-0.44	0.44	-0.37	0.06	0.996728	0.996842	0.998617	0.847848	1	1	1	1	73.1	134	76.9	103.2	99.1	29.12	17.72	9.92	119.74	54.08	58.3	38.4	98.3
FALSE	High	IsMasterProtein	P15705	STI1	D6W293; P15705; sce:YOR027W	Heat shock protein STI1 [OS=Saccharomyces cerevisiae S288C]	16.584	0	8	5	5	5	5	66.2	9.81	8	5	5	48	0	1.383	0.832	1.345	1.361	0.47	-0.26	0.43	0.44	0.00462114	0.0821843	0.00771695	0.00397286	0.0662079	0.421794	0.116542	0.0616867	118.1	71.1	114.9	116.2	85.4	2.3	5.74	4.98	4.2	1.91	114.8	118.6	67.4
FALSE	High	IsMasterProtein	P40989	GSC2	D6VUG8; P40989; Q45U52; sce:YGR032W	1,3-beta-glucan synthase component GSC2 [OS=Saccharomyces cerevisiae S288C]	87.807	0	12	19	23	3	3	216.9	67.72	12	23	19	109	0	0.952	1.715	1.353	1.384	-0.07	0.78	0.44	0.47	0.999674	0.12513	0.569005	0.356071	1	0.552042	1	0.836658	73.8	133	104.9	107.3	77.6	2.53	13.66	5.84	31.32	3.35	73.6	71	143.4
FALSE	High	IsMasterProtein	P53848	FOL1	D6W0T7; P53848; Q2VQX0; sce:YNL256W	Folic acid synthesis protein FOL1 [OS=Saccharomyces cerevisiae S288C]	8.328	0	4	3	3	3	3	93.1	8.93	4	3	3	96	0	0.891	1.357	1.222	1.195	-0.17	0.44	0.29	0.26	0.999732	0.976209	0.996284	0.816453	1	1	1	1	74	112.7	101.5	99.3	83.1	13.87	2.11	5.71	78.88	46.33	58	70.6	99
FALSE	Medium	IsMasterProtein	P53084		P53084	Putative uncharacterized protein YGL218W [OS=Saccharomyces cerevisiae S288C]	1.603	36	4	1	1	1	1	24.1	2.29	4	1	1	0	0	0.142	0.897	0.308	0.369	-2.81	-0.16	-1.7	-1.44	0.187586	0.99998	0.585889	0.717228	0.532189	1	1	1	27.5	173.2	59.4	71.2	193.1	11.59	43.04	5.82	25.52	19.73	29	24.6	123.2
FALSE	Medium	None	P38314	SDS24	D6VQL0; P38314; sce:YBR214W	Protein SDS24 [OS=Saccharomyces cerevisiae S288C]	1.378	52	1	1	1	0	1	57.2	0	1	1	1	105	0	57.084	33.029	51.914	16.953	5.84	5.05	5.7	4.08									204.9	118.6	186.4	60.9	3.6	14.24	29.28	0.16	39.14		249.1	203.5	160.8
FALSE	High	None	Q07791	TY2B-DR3	D6VSP2; Q03934; Q07791; sce:YDR261W-B	Transposon Ty2-DR3 Gag-Pol polyprotein [OS=Saccharomyces cerevisiae S288C]	17.136	0	4	5	6	0	5	201.8	16.45	4	6	5	97	0	2.392	1.145	2.81	3.232	1.26	0.2	1.49	1.69	0.0956673	0.994179	0.0460419	0.0123355	0.355734	1	0.276497	0.107375	123.9	59.3	145.6	167.4	51.8	10.35	8.48	17.49	46.9	2.08	120.5	104.1	50.5
FALSE	High	IsMasterProtein	P53079	COG1	D6VVB2; P53079; sce:YGL223C	Conserved oligomeric Golgi complex subunit 1 [OS=Saccharomyces cerevisiae S288C]	6.055	0	4	1	1	1	1	48.3	4.57	4	1	1	54	0	0.908	0.712	0.747	0.828	-0.14	-0.49	-0.42	-0.27	0.999411	0.867545	0.922132	0.999989	1	1	1	1	105.4	82.6	86.7	96.1	116	25.29	1.62	12.53	50.26	34.73	82.7	118.8	78.6
FALSE	High	IsMasterProtein	Q08217	PSK2	D6W221; Q08217; sce:YOL045W	Serine/threonine-protein kinase PSK2 [OS=Saccharomyces cerevisiae S288C]	12.369	0	3	3	3	3	3	124.3	9.85	3	3	3	108	0	0.575	0.562	0.637	0.667	-0.8	-0.83	-0.65	-0.59	0.919552	0.906818	0.963186	0.99999	1	1	1	1	82.7	80.9	91.6	95.9	143.8	11.19	6.62	0.54	110.22	0.38	58.2	68.2	64.5
FALSE	Medium	IsMasterProtein	P53185	VIR1	D6VUA3; P53185; sce:YGL036W	subunit of the m6A methyltransferase (MIS) complex; required for the stability of MIS complex subunits	1.665	33	1	1	1	1	1	102.3	1.98	1	1	1	0	0	0.635	0.38	0.865	2.594	-0.65	-1.39	-0.21	1.37	0.125909	0.00418002	0.901276	0.00450493	0.409829	0.111597	1	0.0681074	63.9	38.2	87	260.8	100.5	26.78	16.52	14.78	1.69	0.44	83.6	57	36.7
FALSE	High	IsMasterProtein	P53141	MLC1	D6VU40; P53141; sce:YGL106W	Myosin light chain 1 [OS=Saccharomyces cerevisiae S288C]	16.246	0	33	3	3	3	3	16.4	10.79	33	3	3	109	0	0.731	0.549	0.589	0.468	-0.45	-0.87	-0.76	-1.1	0.416465	0.0452295	0.0787586	0.0144501	0.857007	0.300136	0.371743	0.114916	100.2	75.1	80.7	64.1	136.9	13.54	4.25	9.52	16.99	12.02	91.9	111.3	78.2
FALSE	High	None	P0C2I2	TY1B-DR5	D6VSU6; P0C2I2; sce:YDR316W-B	Transposon Ty1-DR5 Gag-Pol polyprotein [OS=Saccharomyces cerevisiae S288C]	81.107	0	12	16	21	0	2	198.4	66.59	12	21	16	97	0	0.823	0.794	0.464	3.415	-0.28	-0.33	-1.11	1.77	0.999906	0.999786	0.949347	0.999119	1	1	1	1	61	58.8	34.4	253.1	74.1	15.42	4.46	39.15	79.75	7.12	71.9	57.8	60.3
FALSE	High	IsMasterProtein	P53145	LSG1	D6VU46; P53145; sce:YGL099W	Large subunit GTPase 1 [OS=Saccharomyces cerevisiae S288C]	114.459	0	47	24	31	24	24	72.7	91.57	47	31	24	80	0	2.374	0.837	1.6	0.937	1.25	-0.26	0.68	-0.09	0.00390377	0.795849	0.0860068	0.75555	0.0590189	1	0.384376	1	182.3	64.3	122.8	72	76.8	3.79	5.57	1.68	22.12	1.38	194.1	183.9	69.3
FALSE	High	IsMasterProtein	P89105	CTR9	D6W1S4; O14409; P89105; Q07332; Q08292; sce:YOL145C	RNA polymerase-associated protein CTR9 [OS=Saccharomyces cerevisiae S288C]	6.009	0	1	1	1	1	1	124.6	4.1	1	1	1	226	0
FALSE	High	IsMasterProtein	P38627	URA8	D6VWS2; P38627; sce:YJR103W	CTP synthase 2 [OS=Saccharomyces cerevisiae S288C]	13.823	0	7	2	2	1	1	64.5	7.81	7	2	2	96	0	0.394	0.586	0.493	0.345	-1.34	-0.77	-1.02	-1.53	0.2042	0.666853	0.42147	0.063211	0.562651	1	1	0.29286	66.7	99.2	83.4	58.5	169.3	8.73	1.25	3.25	55.83	15.28	64.3	72.7	100.7
FALSE	Low	IsMasterProtein	P23293	SGV1	D6W4G2; P23293; sce:YPR161C	Serine/threonine-protein kinase BUR1 [OS=Saccharomyces cerevisiae S288C]	0.914	90	2	1	1	1	1	74.2	0	2	1	1	145	0	0.162	0.201	0.222	0.305	-2.62	-2.32	-2.17	-1.71	0.228185	0.322856	0.378527	0.792339	0.604113	0.993408	0.981779	1	44.2	54.7	60.5	83.1	272.2	40.2	20.13	14.74	119.87	24.52	46.4	25.9	49.5
FALSE	High	IsMasterProtein	P33327	GDH2	D6VRD9; P33327; sce:YDL215C	NAD-specific glutamate dehydrogenase [OS=Saccharomyces cerevisiae S288C]	6.3	0	3	2	2	2	2	124.3	5.27	3	2	2	40	0	0.701	0.738	0.962	0.601	-0.51	-0.44	-0.06	-0.73	0.710891	0.813786	0.999981	0.560902	1	1	1	1	83.3	87.7	114.3	71.4	118.8	24.16	6.44	36.3	27.92	16.86	69	97.4	90.3
FALSE	High	IsMasterProtein	P39960	BEM2	D3DM62; P39960; sce:YER155C	GTPase-activating protein BEM2/IPL2 [OS=Saccharomyces cerevisiae S288C]	99.929	0	12	21	25	21	21	245.3	72.05	12	25	21	87	0	1.126	1.205	1.284	0.935	0.17	0.27	0.36	-0.1	0.994194	0.95943	0.878935	0.800588	1	1	1	1	102.7	109.9	117.1	85.3	91.2	18.74	2.18	15.69	34.43	6.5	121.7	93.3	112.3
FALSE	High	IsMasterProtein	P15624	FRS1	D6VY62; E9P8X0; P15624; sce:YLR060W	Phenylalanine--tRNA ligase beta subunit [OS=Saccharomyces cerevisiae S288C]	12.666	0	5	4	4	4	4	67.3	8.8	5	4	4	83	0	3.163	2.429	3.791	2.12	1.66	1.28	1.92	1.08	0.0605319	0.158566	0.0323985	0.261503	0.28506	0.645511	0.258513	0.715398	137.8	105.8	165.1	92.4	43.6	18.95	38.64	29.75	32.83	36.94	167	127.5	84.7
FALSE	High	None	Q04214	TY1B-MR1	D6VZM0; Q04214; sce:YMR045C	Transposon Ty1-MR1 Gag-Pol polyprotein [OS=Saccharomyces cerevisiae S288C]	28.818	0	4	7	9	0	1	198.8	21.38	4	9	7	97	0	1.397	1.224	1.343	3.348	0.48	0.29	0.43	1.74	0.832723	0.973654	0.888921	0.00871267	1	1	1	0.100109	84.6	74.2	81.4	202.8	60.6	7.86	10.74	5.11	47.25	29.49	73.9	66.1	66.1
FALSE	High	IsMasterProtein	P39016	MPT5	D6VTX5; P39016; sce:YGL178W	Suppressor protein MPT5 [OS=Saccharomyces cerevisiae S288C]	12.676	0	4	2	2	2	2	95.4	7.55	4	2	2	89	0	0.639	0.67	1.037	1.934	-0.65	-0.58	0.05	0.95	0.249219	0.338719	0.999935	0.0778068	0.628731	1	1	0.329889	60.8	63.8	98.7	184.2	95.2	3.58	21.64	5.96	21.2	20.53	60.1	57.2	71.8
FALSE	High	IsMasterProtein	P53131	PRP43	D6VU28; P53131; sce:YGL120C	Pre-mRNA-splicing factor ATP-dependent RNA helicase PRP43 [OS=Saccharomyces cerevisiae S288C]	9.887	0	4	2	2	2	2	87.5	7.22	4	2	2	104	0	0.421	0.587	0.624	0.553	-1.25	-0.77	-0.68	-0.85	0.528986	0.868089	0.913565	0.92718	0.970935	1	1	1	62.6	87.2	92.7	82.2	148.6	5.17	30.23	61.76	62.84	59.75	59.2	55	64
FALSE	High	IsMasterProtein	P39940	RSP5	D3DM31; P39940; sce:YER125W	E3 ubiquitin-protein ligase RSP5 [OS=Saccharomyces cerevisiae S288C]	4.902	1	3	2	2	2	2	91.8	2.47	3	2	2	289	0
FALSE	High	IsMasterProtein	Q06251		D6VYI1; Q06251; sce:YLR177W	Uncharacterized protein YLR177W [OS=Saccharomyces cerevisiae S288C]	56.071	0	21	11	16	8	8	71.2	45.89	21	16	11	1	0	0.933	0.654	1.325	1.451	-0.1	-0.61	0.41	0.54	0.999469	0.489164	0.81061	0.299673	1	1	1	0.768582	89	62.4	126.4	138.4	95.4	28	8.3	30.96	30.1	7.02	100.2	67.1	60.9
FALSE	High	None	Q12293	TY2A-OR2	D6W339; Q12293; sce:YOR343W-A	Transposon Ty2-OR2 Gag polyprotein [OS=Saccharomyces cerevisiae S288C]	17.136	0	15	5	6	0	5	49.8	16.45	15	6	5	21	0	2.392	1.145	2.81	3.232	1.26	0.2	1.49	1.69	0.0956673	0.994179	0.0460419	0.0123355	0.355734	1	0.276497	0.107375	123.9	59.3	145.6	167.4	51.8	10.35	8.48	17.49	46.9	2.08	120.5	104.1	50.5
FALSE	High	IsMasterProtein	P38828	LSM12	D3DL71; P38828; sce:YHR121W	Protein LSM12 [OS=Saccharomyces cerevisiae S288C]	25.22	0	25	5	6	5	5	21.3	20.09	25	6	5	34	0	1.735	1.383	1.565	5.191	0.79	0.47	0.65	2.38	0.464407	0.857335	0.646441	0.00799529	0.910586	1	1	0.0967009	79.9	63.7	72.1	239.2	46.1	8.94	6.24	2.03	42.24	21.33	72.5	82.3	58.9
FALSE	High	None	Q99231	TY1B-DR3	D6VSJ3; Q99231; sce:YDR210C-D	Transposon Ty1-DR3 Gag-Pol polyprotein [OS=Saccharomyces cerevisiae S288C]	79.661	0	11	15	20	0	1	198.7	66.59	11	20	15	97	0	0.823	0.794	0.464	3.415	-0.28	-0.33	-1.11	1.77	0.999906	0.999786	0.949347	0.999119	1	1	1	1	61	58.8	34.4	253.1	74.1	15.42	4.46	39.15	79.75	7.12	71.9	57.8	60.3
FALSE	High	IsMasterProtein	Q00055	GPD1	A5YWB0; D6VRW8; Q00055; Q6J5J2; Q6J5J5; sce:YDL022W	Glycerol-3-phosphate dehydrogenase [NAD(+)] 1 [OS=Saccharomyces cerevisiae S288C]	16.522	0	15	4	5	4	4	42.8	17.16	15	5	4	106	0	0.481	1.045	0.572	0.708	-1.05	0.06	-0.81	-0.5	0.00270609	0.998214	0.0125191	0.196082	0.0536087	1	0.151415	0.607273	60.5	131.2	71.8	88.9	125.6	1.83	3.54	4.31	13.15	14.74	60.6	59.1	133.1
FALSE	High	IsMasterProtein	P38804	RTC3	D3DL39; P38804; sce:YHR087W	Restriction of telomere capping protein 3 [OS=Saccharomyces cerevisiae S288C]	4.424	1	15	1	1	1	1	12	3.8	15	1	1	26	0	0.613	0.699	0.673	1.174	-0.71	-0.52	-0.57	0.23	0.703615	0.883241	0.838146	0.999419	1	1	1	1	75	85.5	82.4	143.7	122.3	24.54	3.59	1.16	50.01	36.11	59.9	85	79.3
FALSE	Low	None	P38629	RFC3	D6W0Q3; P38629; sce:YNL290W	Replication factor C subunit 3 [OS=Saccharomyces cerevisiae S288C]	1.124	70	2	1	1	0	1	38.2	0	2	1	1	115	0
FALSE	High	None	Q12113	TY2B-OR1	D6W2Q0; Q12113; sce:YOR192C-B	Transposon Ty2-OR1 Gag-Pol polyprotein [OS=Saccharomyces cerevisiae S288C]	17.136	0	4	5	6	0	5	201.9	16.45	4	6	5	97	0	2.392	1.145	2.81	3.232	1.26	0.2	1.49	1.69	0.0956673	0.994179	0.0460419	0.0123355	0.355734	1	0.276497	0.107375	123.9	59.3	145.6	167.4	51.8	10.35	8.48	17.49	46.9	2.08	120.5	104.1	50.5
FALSE	High	IsMasterProtein	P0CX40	RPS8B	A2TBM0; A2TBP0; D3DM09; P05754; P0CX40; P22801; sce:YBL072C; sce:YER102W	40S ribosomal protein S8-B [OS=Saccharomyces cerevisiae S288C]	58.111	0	60	11	14	11	11	22.5	49.7	60	14	11	64	0	0.445	1.414	0.987	1.082	-1.17	0.5	-0.02	0.11	0.00650767	0.268278	0.999998	0.999997	0.0795459	0.890125	1	1	44	139.9	97.6	107	98.9	19.09	17.17	4.97	11.22	21.41	50.7	38.6	158.8
FALSE	High	IsMasterProtein	P36166	PXL1	D6VXF0; P36166; sce:YKR090W	Paxillin-like protein 1 [OS=Saccharomyces cerevisiae S288C]	5.019	1	3	2	2	2	2	79.4	4.36	3	2	2	46	0	7.295	7.033	8.83	8.836	2.87	2.81	3.14	3.14	0.123822	0.132136	0.0884334	0.0883268	0.406999	0.569625	0.387824	0.362455	118.2	114	143.1	143.2	16.2	13.44	8.41	7.2	6.78	106.6	113.3	137.1	113.2
FALSE	High	IsMasterProtein	P06100	CDC36	D6VRI6; P06100; sce:YDL165W	General negative regulator of transcription subunit 2 [OS=Saccharomyces cerevisiae S288C]	5.935	0	13	2	2	2	2	22.3	5.01	13	2	2	154	0	0.568	0.378	0.42	0.389	-0.81	-1.4	-1.25	-1.36	0.307125	0.0414147	0.0695272	0.0257207	0.718711	0.289881	0.353481	0.159237	98.8	65.7	73.1	67.6	173.8	21.15	11.48	5.23	18.19	24.73	85.9	116.2	61.3
FALSE	High	None	P0CX73	TY1A-PL	D3DM44; P0CX73; Q12162; sce:YDR365W-A; sce:YER137C-A; sce:YLR157C-A; sce:YPL257W-A	Transposon Ty1-PL Gag polyprotein [OS=Saccharomyces cerevisiae S288C]	69.098	0	38	13	18	0	3	48.9	56.12	38	18	13	21	0	1.487	1.163	1.427	3.794	0.57	0.22	0.51	1.92	0.118019	0.835584	0.175461	7.20385e-05	0.394197	1	0.591669	0.00752475	86.1	67.3	82.6	219.6	57.9	10.46	6.39	2.92	15.73	14.99	83.4	71.9	63.4
FALSE	High	IsMasterProtein	P53600	RET3	D6W402; P53600; sce:YPL010W	Coatomer subunit zeta [OS=Saccharomyces cerevisiae S288C]	38.165	0	29	4	10	4	4	21.7	23.89	29	10	4	52	0	2.617	0.922	1.947	1.126	1.39	-0.12	0.96	0.17	0.013431	0.997657	0.0783036	0.999615	0.111842	1	0.371743	1	181	63.8	134.6	77.9	69.2	2.99	9.05	0.36	29.63	21.72	181.1	188.9	69.5
FALSE	High	IsMasterProtein	P40529	AGE2	D6VVN8; P40529; sce:YIL044C	ADP-ribosylation factor GTPase-activating protein effector protein 2 [OS=Saccharomyces cerevisiae S288C]	13.275	0	8	2	4	2	2	32.6	15.28	8	4	2	38	0	1.62	0.51	1.599	1.224	0.7	-0.97	0.68	0.29	0.650555	0.357669	0.672404	0.999701	1	1	1	1	147	46.3	145.1	111.1	90.8	11.35	9.24	5.67	45.09	19.53	140.3	164.8	44.9
FALSE	High	IsMasterProtein	P19882	HSP60	D6VYQ6; P19882; sce:YLR259C	Heat shock protein 60, mitochondrial [OS=Saccharomyces cerevisiae S288C]	10.529	0	6	2	2	2	2	60.7	7.32	6	2	2	137	0	0.987	0.859	0.796	0.723	-0.02	-0.22	-0.33	-0.47	0.999999	0.936694	0.759501	0.236434	1	1	1	0.675776	111	96.6	89.5	81.3	112.4	23.36	6.28	10.37	21.11	1.6	95.8	133.7	94.2
FALSE	High	IsMasterProtein	Q06096	COG4	D6W4A3; Q06096; sce:YPR105C	Conserved oligomeric Golgi complex subunit 4 [OS=Saccharomyces cerevisiae S288C]	15.045	0	7	3	3	3	3	98.6	12.13	7	3	3	54	0	0.712	0.661	0.684	0.681	-0.49	-0.6	-0.55	-0.55	0.813461	0.677839	0.742913	0.993943	1	1	1	1	88.6	82.2	85.1	84.7	124.4	13.34	4	12.67	53.68	5.34	75.3	91	79
FALSE	Medium	IsMasterProtein	P25588	MRC1	D6VQV6; P25588; P25589; P27513; P87003; Q07218; Q8NIN2; sce:YCL061C	Mediator of replication checkpoint protein 1 [OS=Saccharomyces cerevisiae S288C]	1.894	17	1	1	1	1	1	124.3	0	1	1	1	126	0	0.423	0.452	0.498	0.556	-1.24	-1.15	-1.01	-0.85	0.810024	0.851523	0.904091	1	1	1	1	1	76.4	81.6	89.8	100.3	180.5	3.83	13.65	16.8	126.24	6.54	48.3	51	58.3
FALSE	High	IsMasterProtein	P36224	JNM1	D6W0C1; P36224; sce:YMR294W	Nuclear migration protein JNM1 [OS=Saccharomyces cerevisiae S288C]	4.094	3	4	1	2	1	1	43.6	5.18	4	2	1	59	0	3.473	4.339	3.141	2.651	1.8	2.12	1.65	1.41	0.0842713	0.0407565	0.11765	0.0724784	0.348301	0.287046	0.458237	0.3225	116.8	146	105.7	89.2	33.6	20.14	2.08	9.3	42.41	64.69	95	126.5	139
FALSE	High	IsMasterProtein	P40825	ALA1	D6W330; P40825; sce:YOR335C	Alanine--tRNA ligase, mitochondrial [OS=Saccharomyces cerevisiae S288C]	7.328	0	4	2	2	2	2	110	7.62	4	2	2	107	0
FALSE	High	IsMasterProtein	Q06449	PIN3	D6W4F0; Q06449; sce:YPR154W	[PSI+] inducibility protein 3 [OS=Saccharomyces cerevisiae S288C]	18.376	0	38	6	8	6	6	23.5	21.34	38	8	6	38	0	2.473	1.29	3.073	3.933	1.31	0.37	1.62	1.98	0.00749544	0.653213	0.00213699	0.000262347	0.0869925	1	0.0636316	0.0167465	113.7	59.3	141.3	180.8	46	6.54	12.31	17.52	25.21	14.26	108.2	98.6	58.8
FALSE	High	IsMasterProtein	Q03769	ENT5	D6VSD5; Q03769; Q6Q5U2; sce:YDR153C	Epsin-5 [OS=Saccharomyces cerevisiae S288C]	26.075	0	12	4	5	4	4	47.3	17.89	12	5	4	83	0	3.595	1.569	2.676	2.042	1.85	0.65	1.42	1.03	0.00080344	0.16575	0.00395279	0.00827064	0.0288485	0.660699	0.0825773	0.0989892	182.4	79.6	135.8	103.6	50.7	2.44	7.96	9.93	21.5	3.16	174.5	180.6	73.2
FALSE	High	IsMasterProtein	P05745	RPL36A	D6W018; P05745; sce:YMR194W	60S ribosomal protein L36-A [OS=Saccharomyces cerevisiae S288C]	18.076	0	33	4	4	0	4	11.1	14.31	33	4	4	51	0	0.525	1.107	0.788	0.629	-0.93	0.15	-0.34	-0.67	0.538797	0.999661	0.982284	0.791631	0.978006	1	1	1	66.1	139.3	99.2	79.1	125.9	16.24	10.21	16.38	53.79	33.6	72.4	57.5	146.2
FALSE	Medium	None	Q12675	DNF2	D6VS80; Q12675; sce:YDR093W	Phospholipid-transporting ATPase DNF2 [OS=Saccharomyces cerevisiae S288C]	1.565	37	0	1	1	0	1	182.5	2.16	0	1	1	99	0	0.633	0.881	1.024	0.665	-0.66	-0.18	0.03	-0.59	0.578483	0.995604	0.999999	0.670518	1	1	1	1	36.4	50.6	58.9	38.2	57.5	28.42	21.87	11.14	32.8	29.46	47.4	31.5	62.8
FALSE	High	IsMasterProtein	P43588	RPN11	D6VTN4; P43588; Q8J0T5; sce:YFR004W	Ubiquitin carboxyl-terminal hydrolase RPN11 [OS=Saccharomyces cerevisiae S288C]	78.177	0	45	16	22	16	16	34.4	61.64	45	22	16	91	0	2.759	0.409	1.209	0.602	1.46	-1.29	0.27	-0.73	0.0061431	0.0123543	0.881904	0.129625	0.076722	0.169278	1	0.465802	237.6	35.2	104.1	51.8	86.1	31.71	5.63	1.96	19.83	13.61	305.3	193.5	37.5
FALSE	High	IsMasterProtein	P40214	FDO1	D6VZW6; P40214; sce:YMR144W	Protein FDO1 [OS=Saccharomyces cerevisiae S288C]	4.754	1	5	2	2	2	2	38.5	2.21	5	2	2	15	0	0.085	0.121	0.168	0.281	-3.55	-3.04	-2.57	-1.83	0.107425	0.187597	0.309416	0.876541	0.380962	0.710762	0.847739	1	27.5	39.2	54.5	90.9	323.7	6.08	20.98	20.58	129.76	16.55	19.8	18.1	31.3
FALSE	Medium	IsMasterProtein	P40009	YND1	D3DLQ1; P40009; Q6B252; sce:YER005W	Golgi apyrase [OS=Saccharomyces cerevisiae S288C]	1.168	66	1	1	1	1	1	71.8	2.12	1	1	1	124	0	0.88	0.711	0.807	0.523	-0.18	-0.49	-0.31	-0.94	0.996332	0.820252	0.96548	0.319165	1	1	1	0.788647	122	98.6	111.9	72.5	138.6	7.08	47.59	15.77	12.58	16.16	136.6	123.5	74
FALSE	High	IsMasterProtein	P32047	MLF3	D6W1A5; P32047; sce:YNL074C	Protein MLF3 [OS=Saccharomyces cerevisiae S288C]	16.531	0	15	3	4	3	3	49.2	13.04	15	4	3	15	0	0.839	0.743	1.045	1.262	-0.25	-0.43	0.06	0.34	0.995781	0.959354	0.999995	0.999152	1	1	1	1	85.4	75.6	106.3	128.4	101.8	21.17	0.65	7.51	51.44	8.61	76	102.7	77.9
FALSE	High	IsMasterProtein	P13186	KIN2	D6VY96; P13186; Q12384; sce:YLR096W	Serine/threonine-protein kinase KIN2 [OS=Saccharomyces cerevisiae S288C]	1.997	11	1	1	1	1	1	128.3	2.65	1	1	1	100	0
FALSE	High	IsMasterProtein	P38315	YBP1	D6VQL2; P38315; sce:YBR216C	YAP1-binding protein 1 [OS=Saccharomyces cerevisiae S288C]	6.191	0	2	1	3	1	1	77.7	9.87	2	3	1	12	0	0.363	0.552	0.412	0.328	-1.46	-0.86	-1.28	-1.61	0.400586	0.822104	0.519275	0.578742	0.854168	1	1	1	64	97.2	72.5	57.8	176	22.89	39.31	23.97	80.75	8.1	49.7	69	118.4
FALSE	High	IsMasterProtein	P40956	GTS1	D6VTX2; P40956; sce:YGL181W	Protein GTS1 [OS=Saccharomyces cerevisiae S288C]	24.115	0	18	6	8	6	6	44.4	19.04	18	8	6	103	0	1.259	0.833	1.445	4.59	0.33	-0.26	0.53	2.2	0.801387	0.906456	0.425716	0.000687897	1	1	1	0.0191752	73.7	48.7	84.5	268.5	58.5	6.25	3.68	9.15	29.76	0.62	72.4	66.3	47
FALSE	High	IsMasterProtein	P49723	RNR4	D6VUW4; P49723; Q66R92; sce:YGR180C	Ribonucleoside-diphosphate reductase small chain 2 [OS=Saccharomyces cerevisiae S288C]	73.012	0	43	15	22	15	15	40	61.92	43	22	15	65	0	2.089	0.668	1.758	1.122	1.06	-0.58	0.81	0.17	0.317235	0.807171	0.553132	0.99382	0.734752	1	1	1	170	54.4	143	91.3	81.4	23.93	9.62	22.27	45.3	6.22	148.3	208.7	60.3
FALSE	High	IsMasterProteinCandidate	P07281	RPS19B	D6W0P2; P07281; sce:YNL302C	40S ribosomal protein S19-B [OS=Saccharomyces cerevisiae S288C]	6.509	0	12	1	1	0	1	15.9	4.45	12	1	1	88	0	0.459	1.049	0.758	0.805	-1.12	0.07	-0.4	-0.31	0.522424	0.999996	0.983698	0.999972	0.961964	1	1	1	50.3	115	83	88.3	109.6	26.73	0.94	5.27	81.49	18.59	36.9	54.1	102.9
FALSE	High	IsMasterProtein	P25386	USO1	D6VRT8; E9PAG8; P25386; P89892; Q07380; sce:YDL058W	Intracellular protein transport protein USO1 [OS=Saccharomyces cerevisiae S288C]	51.112	0	9	17	18	17	17	206.3	39.19	9	18	17	78	0	1.214	0.53	1.296	0.807	0.28	-0.91	0.37	-0.31	0.999981	0.994302	0.999921	0.753659	1	1	1	1	126	55	134.5	83.7	103.8	4.6	4.72	7.43	84.39	31.48	139.7	130.9	57.1
FALSE	High	IsMasterProtein	P38711	RPS27B	D3DKW6; P38711; sce:YHR021C	40S ribosomal protein S27-B [OS=Saccharomyces cerevisiae S288C]	7.015	0	18	2	2	0	2	8.9	5.3	18	2	2	89	0	0.608	2.027	0.707	1.531	-0.72	1.02	-0.5	0.61	0.705271	0.412481	0.900279	0.807258	1	1	1	1	51.4	171.6	59.8	129.5	84.6	24.09	35.96	21.66	53.1	33.71	63.9	45.3	232.9
FALSE	High	None	O42831		O42831	Putative inosine-5'-monophosphate dehydrogenase-like protein YAR075W [OS=Saccharomyces cerevisiae S288C]	11.409	0	10	2	3	0	0	17	9.14	10	3	2	43	0	0.603	0.39	0.936	0.673	-0.73	-1.36	-0.09	-0.57	0.730779	0.216616	0.999959	0.999999	1	0.779546	1	1	69.3	44.9	107.7	77.5	115.1	3.23	4	9.13	71.52	22.47	64	61.1	39.4
FALSE	High	IsMasterProtein	P50095	IMD3	D6VZ67; P50095; sce:YLR432W	Inosine-5'-monophosphate dehydrogenase 3 [OS=Saccharomyces cerevisiae S288C]	86.182	0	32	11	18	4	4	56.5	74.24	32	18	11	87	0	1.478	1.346	1.672	1.852	0.56	0.43	0.74	0.89	0.305817	0.547335	0.128384	0.10406	0.718577	1	0.49171	0.398548	106.9	97.3	120.9	133.9	72.3	4.21	7.91	5.49	19.92	25.41	104	110.4	103.1
FALSE	High	None	Q04120	TSA2	D6VT78; Q04120; sce:YDR453C	Peroxiredoxin TSA2 [OS=Saccharomyces cerevisiae S288C]	3.791	3	4	1	2	0	1	21.6	2.45	4	2	1	42	0	12.751	10.723	13.477	6.401	3.67	3.42	3.75	2.68									166.5	140	176	83.6	13.1	3.84	3.32	23.28	37.67		170.4	179.9	150.7
FALSE	High	IsMasterProtein	P40022		D3DLT3; P40022; sce:YER034W	Uncharacterized protein YER034W [OS=Saccharomyces cerevisiae S288C]	22.849	0	37	6	8	6	6	21.2	18.55	37	8	6	1	0	4.24	0.297	2.272	1.042	2.08	-1.75	1.18	0.06	0.00541601	0.0141023	0.0902265	0.999892	0.0699213	0.174625	0.39269	1	264.4	18.5	141.7	65	62.4	2.53	51.88	16.63	20.54	1.66	264.9	274.5	27.7
FALSE	High	IsMasterProtein	P07284	SES1	D6VS09; P07284; sce:YDR023W	Serine--tRNA ligase, cytoplasmic [OS=Saccharomyces cerevisiae S288C]	163.117	0	48	23	40	23	23	53.3	143.26	48	40	23	83	0	3.195	0.921	2.002	1.094	1.68	-0.12	1	0.13	0.0376506	0.999619	0.268806	0.997696	0.216501	1	0.785899	1	202.7	58.5	127.1	69.4	63.5	13.58	9.07	12.7	43.88	1	191.6	232.3	64.9
FALSE	High	IsMasterProtein	Q05775	HCR1	D6VYJ5; Q05775; sce:YLR192C	Eukaryotic translation initiation factor 3 subunit J [OS=Saccharomyces cerevisiae S288C]	14.616	0	15	2	2	2	2	29.5	9.91	15	2	2	90	0	1.165	0.884	1.158	1.046	0.22	-0.18	0.21	0.07	0.992806	0.997282	0.993983	0.897265	1	1	1	1	108.8	82.5	108.2	97.7	93.4	10.24	5.51	13.12	56.42	5.99	93.3	107.9	79.1
FALSE	High	IsMasterProtein	P38249	RPG1	D6VQ78; P38249; sce:YBR079C	Eukaryotic translation initiation factor 3 subunit A [OS=Saccharomyces cerevisiae S288C]	269.811	0	53	55	80	55	55	110.3	232.1	53	80	55	88	0	3.237	0.998	3.033	1.322	1.69	0	1.6	0.4	0.000141642	1	0.000205663	0.0651778	0.0116248	1	0.0280417	0.297005	178	54.9	166.8	72.7	55	6.38	13.28	3.32	16.75	11.54	186.8	170.7	60.5
FALSE	High	IsMasterProtein	P32466	HXT3	D6VSX5; P32466; sce:YDR345C	Low-affinity glucose transporter HXT3 [OS=Saccharomyces cerevisiae S288C]	10.678	0	4	2	2	2	2	62.5	6.85	4	2	2	52	0	0.317	0.405	0.196	0.418	-1.66	-1.3	-2.35	-1.26	0.157706	0.316603	0.0416803	0.344716	0.479375	0.984988	0.276497	0.824496	69.3	88.6	43	91.5	218.7	29.61	13.12	45.62	53.04	3.47	90.1	58.9	102.3
FALSE	High	IsMasterProtein	P32449	ARO4	D6VQP5; P32449; sce:YBR249C	Phospho-2-dehydro-3-deoxyheptonate aldolase, tyrosine-inhibited [OS=Saccharomyces cerevisiae S288C]	81.393	0	45	16	23	13	13	39.7	63.3	45	23	16	37	2	2.866	0.864	2.023	1.559	1.52	-0.21	1.02	0.64	0.0560847	0.99375	0.249292	0.351294	0.275061	1	0.741273	0.829689	190.2	57.3	134.2	103.5	66.4	15.33	2.47	17.39	49.43	0.05	161	200.1	53.2
FALSE	Medium	IsMasterProtein	P38168		P38168	Putative uncharacterized protein YBL100C [OS=Saccharomyces cerevisiae S288C]	1.213	65	6	1	1	1	1	11.2	0	6	1	1	18	0	31.141	3.848	22.092	25.666	4.96	1.94	4.47	4.68	0.02574	0.519547	0.0411497	0.0334308	0.172572	1	0.276497	0.185565	206.6	25.5	146.6	170.3	6.6	19.52	62.49	9.98	22.21	112.03	250.3	189.5	43.3
FALSE	High	IsMasterProtein	P06102	NOT3	D6VVP4; P06102; Q6B233; sce:YIL038C	General negative regulator of transcription subunit 3 [OS=Saccharomyces cerevisiae S288C]	188.423	0	37	34	52	32	32	94.3	143.52	37	52	34	132	1	2.555	1.342	3.353	5.707	1.35	0.42	1.75	2.51	0.00231839	0.378156	0.000478338	2.26909e-05	0.050261	1	0.0354348	0.00651795	97	50.9	127.3	216.6	38	5.33	3.72	2.64	25.72	0.31	90.7	84.2	44.7
FALSE	High	IsMasterProtein	Q12680	GLT1	D6VRI0; Q12290; Q12680; sce:YDL171C	Glutamate synthase [NADH] [OS=Saccharomyces cerevisiae S288C]	67.12	0	10	16	19	16	16	238	52.54	10	19	16	70	0	0.427	0.42	0.451	0.464	-1.23	-1.25	-1.15	-1.11	0.00130901	0.00116575	0.00194772	0.00201914	0.0349086	0.0758863	0.0622454	0.0407016	73.8	72.6	77.8	80.1	172.6	10.97	6.19	7.76	14.98	2.95	68.5	80	76.1
FALSE	High	IsMasterProtein	P53088	NCS6	D6VTU4; P53088; Q92322; sce:YGL211W	Cytoplasmic tRNA 2-thiolation protein 1 [OS=Saccharomyces cerevisiae S288C]	4.986	1	4	1	1	1	1	40	3.76	4	1	1	56	0	0.832	0.842	0.834	0.723	-0.27	-0.25	-0.26	-0.47	0.995915	0.997015	0.996111	0.5202	1	1	1	1	93.1	94.2	93.3	80.9	111.9	21.85	8.32	17.12	49.84	41.23	82.8	113.1	103.9
FALSE	High	IsMasterProtein	P10081	TIF1; TIF2	D6VW46; P10081; sce:YJL138C; sce:YKR059W	ATP-dependent RNA helicase eIF4A [OS=Saccharomyces cerevisiae S288C]	51.315	0	36	9	12	9	9	44.7	38.22	36	12	9	107	0	0.227	0.547	0.304	0.402	-2.14	-0.87	-1.72	-1.31	0.0147039	0.433889	0.0434519	0.113951	0.119821	1	0.276497	0.419762	44.2	106.4	59.1	78.3	194.6	22.4	26	6.22	40.78	34.72	37	51	125.8
FALSE	High	IsMasterProtein	P40361		D6VWB3; P40361; sce:YJL070C	Inactive deaminase YJL070C [OS=Saccharomyces cerevisiae S288C]	70.506	0	18	14	17	14	14	104.2	49.71	18	17	14	13	0	1.295	0.723	2.413	1.358	0.37	-0.47	1.27	0.44	0.512639	0.313487	0.00378231	0.35726	0.955557	0.977944	0.081302	0.837738	101	56.4	188.2	105.9	78	14.45	8.9	5.04	20.25	12.11	111.5	90.8	59.9
FALSE	High	IsMasterProtein	Q07657	SHS1	D6VRD0; Q07657; sce:YDL225W	Seventh homolog of septin 1 [OS=Saccharomyces cerevisiae S288C]	122.681	0	44	19	30	19	19	62.6	98.06	44	30	19	157	0	2.656	0.701	1.744	1.024	1.41	-0.51	0.8	0.03	0.271042	0.942259	0.744275	0.923973	0.665443	1	1	1	193.3	51.1	127	74.5	72.8	0.03	3.3	12.26	56.19	0.32	203.8	203.9	52.6
FALSE	High	IsMasterProtein	P60010	ACT1	D6VTJ1; P02579; P60010; Q9P3X6; Q9P3X7; sce:YFL039C	Actin [OS=Saccharomyces cerevisiae S288C]	66.074	0	39	12	17	11	12	41.7	56.44	39	17	12	237	0	0.65	1.673	0.735	1.132	-0.62	0.74	-0.44	0.18	0.127365	0.0618735	0.354619	0.986461	0.413396	0.362402	0.938842	1	63.7	164	72	110.9	98	11.41	6.44	6.35	20.38	17.55	58.6	68.9	171.1
FALSE	Low	IsMasterProtein	P47141	RSM26	D6VWS0; P47141; sce:YJR101W	37S ribosomal protein S26, mitochondrial [OS=Saccharomyces cerevisiae S288C]	0.959	82	2	1	1	1	1	30.2	0	2	1	1	99	0
FALSE	Medium	IsMasterProteinCandidate	P00546	CDC28	D6VQF5; P00546; sce:YBR160W	Cyclin-dependent kinase 1 [OS=Saccharomyces cerevisiae S288C]	1.941	17	3	1	1	0	1	34	0	3	1	1	382	0	1.229	1.535	1.481	1.438	0.3	0.62	0.57	0.52	0.979428	0.726709	0.784942	0.546907	1	1	1	1	97.5	121.8	117.5	114.1	79.4	2.37	4.69	0.2	58.28	10.63	91.8	88.8	109.1
FALSE	High	IsMasterProtein	P47044		D6VWC7; P47044; sce:YJL055W	LOG family protein YJL055W [OS=Saccharomyces cerevisiae S288C]	9.539	0	7	1	1	1	1	26.8	6.62	7	1	1	38	0
FALSE	High	IsMasterProtein	P32528	DUR1,2	D6VQK5; P32528; sce:YBR208C	Urea amidolyase [OS=Saccharomyces cerevisiae S288C]	1177.3	0	76	127	344	125	126	201.7	1170.79	76	344	127	69	0	0.324	0.942	0.333	0.392	-1.63	-0.09	-1.59	-1.35	0.00128564	0.998197	0.00149692	0.00426938	0.0349086	1	0.0537488	0.0654069	56.3	163.9	57.9	68.2	174	23.49	13.72	5.01	18.02	10.26	47.8	66.8	149.2
FALSE	High	IsMasterProtein	P25294	SIS1	D6W1H0; P25294; sce:YNL007C	Protein SIS1 [OS=Saccharomyces cerevisiae S288C]	2.955	4	6	2	2	2	2	37.6	4.24	6	2	2	118	0	0.585	0.928	0.601	0.795	-0.77	-0.11	-0.73	-0.33	0.229929	0.998871	0.267147	0.493483	0.605028	1	0.785043	1	66.6	105.6	68.4	90.5	113.8	11.13	12.5	21.62	25.99	23.02	62.9	73.7	98.8
FALSE	High	IsMasterProtein	Q06245	SEC10	D6VYH2; P87329; Q06245; sce:YLR166C	Exocyst complex component SEC10 [OS=Saccharomyces cerevisiae S288C]	14.748	0	6	3	3	3	3	100.3	7.77	6	3	3	48	0	0.561	0.546	0.57	0.394	-0.83	-0.87	-0.81	-1.34	0.00802686	0.00634389	0.00931247	0.000620842	0.0886813	0.131487	0.129499	0.0187072	88.5	86.1	90	62.1	157.8	4.97	4.94	11.41	8	9.26	92.3	99	89.8
FALSE	High	IsMasterProtein	Q12458	YPR1	D6VSZ9; Q12458; sce:YDR368W	Putative reductase 1 [OS=Saccharomyces cerevisiae S288C]	64.7	0	42	12	18	10	12	34.7	57.2	42	18	12	43	0	2.33	0.783	2.536	2.047	1.22	-0.35	1.34	1.03	0.00326744	0.502787	0.00184361	0.00362635	0.0552424	1	0.0622454	0.0578706	119.3	40.1	129.8	104.8	51.2	4.38	2.02	9.1	18.82	16.05	120.7	113.5	38.8
FALSE	High	None	P41734	IAH1	D6W2I4; P41734; Q92313; sce:YOR126C	Isoamyl acetate-hydrolyzing esterase [OS=Saccharomyces cerevisiae S288C]	2.441	5	3	1	2	0	1	27.3	2.34	3	2	1	21	0
FALSE	High	IsMasterProtein	P32600	TOR2	D6VX00; P32600; sce:YKL203C	Serine/threonine-protein kinase TOR2 [OS=Saccharomyces cerevisiae S288C]	5.691	0	1	1	1	1	1	281.4	3.35	1	1	1	188	0
FALSE	High	IsMasterProtein	P07172	HIS5	D6VVH1; P07172; sce:YIL116W	Histidinol-phosphate aminotransferase [OS=Saccharomyces cerevisiae S288C]	5.442	1	3	1	1	1	1	42.6	3.49	3	1	1	39	0	0.681	0.904	0.838	0.673	-0.56	-0.15	-0.26	-0.57	0.0376489	0.85931	0.452536	0.0331644	0.216501	1	1	0.185565	79.3	105.3	97.6	78.4	116.5	6.8	6.57	10.85	16.42	1.75	81.7	90	108.7
FALSE	High	IsMasterProtein	P37838	NOP4	D6W3X0; P37838; sce:YPL043W	Nucleolar protein 4 [OS=Saccharomyces cerevisiae S288C]	7.093	0	4	2	2	2	2	77.8	4.43	4	2	2	42	0	0.307	0.276	0.338	0.228	-1.7	-1.86	-1.57	-2.13	0.883662	0.845484	0.913288	0.301683	1	1	1	0.769429	67.7	60.9	74.4	50.2	220.3	19.12	22.04	27.01	93.89	15.01	61.3	80.4	73.9
FALSE	High	IsMasterProtein	P38041	BOI1	D6VPR9; P38041; sce:YBL085W	Protein BOB1 [OS=Saccharomyces cerevisiae S288C]	6.45	0	3	2	2	1	1	109.2	4.12	3	2	2	70	0	0.39	0.269	0.427	0.477	-1.36	-1.89	-1.23	-1.07	0.959325	0.862391	0.97294	0.498765	1	1	1	1	75.6	52.1	82.7	92.3	193.6	19.97	9.78	11.59	83.53	10.63	69.5	92.3	59.1
FALSE	Medium	IsMasterProtein	Q12463	TRM11	D6W1U4; Q12463; sce:YOL124C	tRNA (guanine(10)-N2)-methyltransferase [OS=Saccharomyces cerevisiae S288C]	1.32	52	2	1	1	1	1	50	0	2	1	1	61	0
FALSE	High	IsMasterProtein	P0CS90	SSC1	D6VWL6; P0CS90; P12398; sce:YJR045C	Import motor subunit, mitochondrial [OS=Saccharomyces cerevisiae S288C]	25.84	0	15	7	7	5	7	70.6	22.08	15	7	7	215	0	0.744	0.883	0.653	0.567	-0.43	-0.18	-0.61	-0.82	0.230111	0.879345	0.0595669	0.0102543	0.605028	1	0.32976	0.107375	96.1	114.1	84.5	73.3	129.3	9.54	3.84	0.71	11.71	18.54	91.1	104.3	112.6
FALSE	High	IsMasterProtein	P42845	STB1	D6W0N6; P42845; sce:YNL309W	Protein STB1 [OS=Saccharomyces cerevisiae S288C]	15.724	0	12	4	4	4	4	45.7	11	12	4	4	102	0	0.876	0.601	0.698	0.816	-0.19	-0.73	-0.52	-0.29	0.990671	0.354465	0.65726	0.999706	1	1	1	1	112.8	77.4	89.8	105	128.7	6.15	6.42	18.16	43.36	4.6	111.1	101.8	76.4
FALSE	High	IsMasterProtein	P53252	PIL1	D6VUL8; P53252; sce:YGR086C	Sphingolipid long chain base-responsive protein PIL1 [OS=Saccharomyces cerevisiae S288C]	59.542	0	37	10	12	8	10	38.3	41.79	37	12	10	82	0	2.145	0.659	1.226	0.727	1.1	-0.6	0.29	-0.46	0.707574	0.961551	0.998402	0.616354	1	1	1	1	160.8	49.4	91.9	54.5	75	19.06	8.3	12.35	65.72	14.07	195	148.7	49.3
FALSE	High	IsMasterProtein	P38689	PRS3	D3DKQ2; P38689; sce:YHL011C	Ribose-phosphate pyrophosphokinase 3 [OS=Saccharomyces cerevisiae S288C]	3.279	3	3	1	1	1	1	35.1	2.48	3	1	1	88	0
FALSE	High	IsMasterProtein	Q06677	SWA2	D6VSV1; Q06677; sce:YDR320C	Auxilin-like clathrin uncoating factor SWA2 [OS=Saccharomyces cerevisiae S288C]	42.367	0	25	9	9	9	9	75	32.96	25	9	9	51	0	0.563	0.593	0.647	0.322	-0.83	-0.75	-0.63	-1.63	0.75307	0.812561	0.896693	0.0742254	1	1	1	0.326159	85	89.6	97.8	48.7	151.1	9.16	7.41	2.14	62.05	2.53	83	94.5	98.4
FALSE	High	IsMasterProtein	Q08446	SGT1	D6W2C0; E9P8U7; Q08446; sce:YOR057W	Protein SGT1 [OS=Saccharomyces cerevisiae S288C]	2.87	4	2	1	1	1	1	44.8	2.42	2	1	1	36	0	1.233	0.79	1.099	0.726	0.3	-0.34	0.14	-0.46	0.312432	0.228123	0.887354	0.0799699	0.725221	0.805799	1	0.335348	132.8	85.1	118.3	78.2	107.7	17.69	6.78	2.96	2.06	10.25	162.7	126.5	96.5
FALSE	High	IsMasterProtein	P40327	RPT2	D6VRY1; P40327; sce:YDL007W	26S proteasome regulatory subunit 4 homolog [OS=Saccharomyces cerevisiae S288C]	37.046	0	26	9	11	9	9	48.8	31.37	26	11	9	125	0	2.391	0.956	1.609	0.816	1.26	-0.07	0.69	-0.29	0.52741	0.999999	0.913071	0.640742	0.96959	1	1	1	180.2	72	121.2	61.5	75.3	1.38	6.62	6.1	62.45	2.24	190.5	194.3	73.4
FALSE	High	IsMasterProtein	P07264	LEU1	D6VUC8; P07264; sce:YGL009C	3-isopropylmalate dehydratase [OS=Saccharomyces cerevisiae S288C]	302.651	0	55	49	80	48	49	85.7	246.2	55	80	49	50	0	0.989	0.325	0.462	0.871	-0.02	-1.62	-1.11	-0.2	1	0.00312811	0.0249007	0.923098	1	0.0938778	0.216749	1	125.4	41.2	58.6	110.4	126.8	32.71	4.34	3.33	8.49	1.03	97.5	156.2	41.8
FALSE	High	IsMasterProtein	P38431	TIF5	D6W450; P38431; sce:YPR041W	Eukaryotic translation initiation factor 5 [OS=Saccharomyces cerevisiae S288C]	34.432	0	27	9	9	9	9	45.2	24.04	27	9	9	124	0	1.281	0.982	0.986	1.011	0.36	-0.03	-0.02	0.02	0.987632	1	1	0.917107	1	1	1	1	115.1	88.3	88.6	90.8	89.8	0.15	9.28	0.62	80.66	25.59	100	100.2	71.9
FALSE	High	IsMasterProtein	P38261	EXO84	D6VQA1; P38261; sce:YBR102C	Exocyst complex component EXO84 [OS=Saccharomyces cerevisiae S288C]	24.103	0	12	8	8	8	8	85.5	17.59	12	8	8	96	0	2.316	1.131	2.794	0.878	1.21	0.18	1.48	-0.19	0.641184	0.999866	0.463796	0.939044	1	1	1	1	156.3	76.3	188.5	59.3	67.5	35.3	1.3	25.4	70.2	14.81	207	124.3	79.1
FALSE	High	IsMasterProtein	Q04894	ADH6	D6W0E6; Q04894; sce:YMR318C	NADP-dependent alcohol dehydrogenase 6 [OS=Saccharomyces cerevisiae S288C]	7.533	0	5	1	1	1	1	39.6	4.98	5	1	1	29	0	0.522	1.197	0.608	0.506	-0.94	0.26	-0.72	-0.98	0.00950891	0.638304	0.0337499	0.00754209	0.0975512	1	0.262948	0.0932285	66.4	152.3	77.3	64.4	127.2	3.93	0.72	19.01	11.64	15.08	69.7	73.7	163.7
FALSE	High	IsMasterProtein	P53941	IMP4	D6W1A4; P53941; sce:YNL075W	U3 small nucleolar ribonucleoprotein protein IMP4 [OS=Saccharomyces cerevisiae S288C]	11.234	0	8	3	3	3	3	33.5	6.07	8	3	3	66	0	1.487	0.926	1.455	1.3	0.57	-0.11	0.54	0.38	0.0134327	0.894904	0.0175716	0.0827381	0.111842	1	0.178671	0.341964	123.5	77	120.9	108	83.1	1.59	11.16	9.75	4.59	7.88	135.2	132.1	90.1
FALSE	High	IsMasterProtein	P32908	SMC1	D6VTM2; P32908; sce:YFL008W	Structural maintenance of chromosomes protein 1 [OS=Saccharomyces cerevisiae S288C]	10.946	0	4	5	5	5	5	141.2	12.7	4	5	5	102	0	1.061	0.681	0.901	0.65	0.08	-0.55	-0.15	-0.62	0.998976	0.333171	0.985609	0.248315	1	1	1	0.697588	121.1	77.8	102.9	74.3	114.2	6.53	8.96	14.12	17.37	32.6	136.4	124.3	89.1
FALSE	Medium	None	P40006	IRC22	D3DLP6; P40006; Q05243; sce:YEL001C	Increased recombination centers protein 22 [OS=Saccharomyces cerevisiae S288C]	1.657	33	3	1	4	0	1	25	8.5	3	4	1	18	0	0.431	1.306	0.462	0.247	-1.21	0.39	-1.11	-2.02	0.241131	0.954961	0.303079	0.0378599	0.62531	1	0.839128	0.20423	65.1	197.5	69.8	37.3	151.2	30.56	45	29.95	20.21	25.42	54.9	85.1	149
FALSE	Medium	IsMasterProtein	P39958	GDI1	D3DM41; P39958; sce:YER136W	Rab GDP-dissociation inhibitor [OS=Saccharomyces cerevisiae S288C]	1.99	13	4	1	1	1	1	51.2	0	4	1	1	40	0	0.408	0.806	0.503	0.508	-1.29	-0.31	-0.99	-0.98	0.000445637	0.379047	0.00233382	0.00133524	0.0218642	1	0.0636316	0.0295036	55.3	109.3	68.2	68.9	135.7	14.76	3.26	0.74	6.91	9.81	50.9	62.8	114.4
FALSE	High	IsMasterProtein	P35207	SKI2	D6VZ33; P35207; Q06047; sce:YLR398C	Antiviral helicase SKI2 [OS=Saccharomyces cerevisiae S288C]	327.643	0	44	53	86	53	53	146	266.57	44	86	53	111	0	3.261	0.914	2.853	1.123	1.71	-0.13	1.51	0.17	0.000541947	0.983018	0.00115129	0.916952	0.0231512	1	0.0455965	1	187.2	52.5	163.7	64.4	57.4	0.37	3.16	15.48	19.76	8.84	190.9	191.9	54.9
FALSE	High	None	Q12414	TY1B-PL	D6W3B2; Q12414; sce:YPL257W-B	Transposon Ty1-PL Gag-Pol polyprotein [OS=Saccharomyces cerevisiae S288C]	83.596	0	12	17	22	0	3	198.5	68.92	12	22	17	97	0	1.328	1.055	1.287	3.498	0.41	0.08	0.36	1.81	0.465532	0.998807	0.570891	0.000327684	0.911236	1	1	0.0173549	82.9	65.9	80.4	218.5	62.5	11.21	10.5	2.12	20.82	13.07	81.9	69.9	64.7
FALSE	Medium	IsMasterProtein	P53833	POP3	D6W0R2; P53833; sce:YNL282W	Ribonucleases P/MRP protein subunit POP3 [OS=Saccharomyces cerevisiae S288C]	1.398	50	3	1	1	1	1	22.6	0	3	1	1	95	0
FALSE	High	IsMasterProtein	Q06709	REH1	D6VZ22; Q06709; Q7LIF0; sce:YLR387C	Cytoplasmic 60S subunit biogenesis factor REH1 [OS=Saccharomyces cerevisiae S288C]	3.637	3	3	1	1	1	1	49.7	2.9	3	1	1	18	0	1.414	2.013	1.902	1.235	0.5	1.01	0.93	0.3	0.931335	0.512249	0.584987	0.991059	1	1	1	1	96.9	137.9	130.3	84.6	68.5	2.35	19.67	6.13	1.29	67.28	103.8	100.4	167.1
FALSE	Low	None	Q12743	DFM1	D6VT43; Q12743; Q7LIJ5; sce:YDR411C	DER1-like family member protein 1 [OS=Saccharomyces cerevisiae S288C]	1.098	73	2	1	1	0	1	38.1	0	2	1	1	98	0	0.458	0.533	0.544	0.583	-1.13	-0.91	-0.88	-0.78	0.71105	0.844539	0.859713	0.95232	1	1	1	1	72.6	84.4	86.1	92.3	158.3	44.11	36.77	26.57	67.86	9.26	90.5	47.5	99.4
FALSE	High	IsMasterProtein	P41056	RPL33B	D6W2T8; P41056; sce:YOR234C	60S ribosomal protein L33-B [OS=Saccharomyces cerevisiae S288C]	22.731	0	50	6	9	1	1	12.2	26.23	50	9	6	51	0	2.668	6.636	3.336	3.462	1.42	2.73	1.74	1.79	0.44661	0.0516962	0.272931	0.139237	0.898634	0.329707	0.793645	0.486789	84.9	211.1	106.1	110.2	31.8	7.68	14.83	2.16	47.06	45.94	73.8	82.3	215.4
FALSE	High	IsMasterProteinCandidate	P0C0T4	RPS25B	A2TBM7; D6VYX4; P05758; P07282; P0C0T4; sce:YLR333C	40S ribosomal protein S25-B [OS=Saccharomyces cerevisiae S288C]	5.224	1	15	2	2	0	2	12	4.36	15	2	2	46	0	50.902	100	50.883	50.372	5.67	6.64	5.67	5.65									102.8	279.1	102.7	101.7	2	4.23	44.24	26.96	116.7		66.5	70.6	257
FALSE	High	IsMasterProtein	Q06106	MRD1	D6W4B1; Q06106; sce:YPR112C	Multiple RNA-binding domain-containing protein 1 [OS=Saccharomyces cerevisiae S288C]	5.825	0	2	1	2	1	1	101.1	10.48	2	2	1	157	0	0.526	0.453	0.562	0.448	-0.93	-1.14	-0.83	-1.16	0.510735	0.325732	0.605208	0.554739	0.955557	0.993408	1	1	84.1	72.4	89.8	71.6	159.9	9.91	5.58	0.94	68.59	17.51	74	85.1	71.1
FALSE	High	IsMasterProtein	P38758	TDA3	D3DKV4; P38758; sce:YHR009C	Putative oxidoreductase TDA3 [OS=Saccharomyces cerevisiae S288C]	55.021	0	19	8	14	8	8	57.6	47.15	19	14	8	31	0	1.775	0.796	1.614	1.662	0.83	-0.33	0.69	0.73	0.278969	0.921608	0.432139	0.748808	0.679962	1	1	1	132.8	59.5	120.7	124.3	74.8	8.56	10.8	3	36.94	13.59	127.6	144	56.3
FALSE	High	IsMasterProtein	P46655	GUS1	D6VV90; P46655; sce:YGL245W	Glutamate--tRNA ligase, cytoplasmic [OS=Saccharomyces cerevisiae S288C]	231.376	0	66	44	75	44	44	80.8	219.69	66	75	44	82	0	0.812	1.616	1.029	0.756	-0.3	0.69	0.04	-0.4	0.559935	0.0403059	0.999846	0.196999	1	0.287046	1	0.608471	79	157.2	100.1	73.5	97.2	11.97	6.33	10.9	18.54	1.56	74	87.7	167.7
FALSE	High	IsMasterProtein	P05739	RPL6B	D6VZ82; P05739; sce:YLR448W	60S ribosomal protein L6-B [OS=Saccharomyces cerevisiae S288C]	33.824	0	41	7	10	2	2	20	26.47	41	10	7	67	5	1.081	2.971	1.276	1.226	0.11	1.57	0.35	0.29	0.999735	0.0574688	0.953925	0.896527	1	0.350061	1	1	74.7	205.2	88.1	84.7	69.1	4.75	28.75	3.4	24.5	10.58	70.4	75.3	245.7
FALSE	High	None	Q12213	RPL7B	D6W3H1; Q12213; sce:YPL198W	60S ribosomal protein L7-B [OS=Saccharomyces cerevisiae S288C]	62.937	0	48	14	18	0	14	27.7	50.24	48	18	14	78	0	0.506	1.219	0.551	0.441	-0.98	0.29	-0.86	-1.18	0.504181	0.992803	0.622741	0.201179	0.951109	1	1	0.609906	67.9	163.8	74	59.3	134.4	3.38	30.99	6.21	56.52	10.26	67.4	70.7	208
FALSE	High	IsMasterProtein	P17106	CBF1	D6VWN1; P17106; P17623; Q6Q5N1; sce:YJR060W	Centromere-binding protein 1 [OS=Saccharomyces cerevisiae S288C]	39.438	0	30	7	8	7	7	39.4	22.14	30	8	7	129	0	0.27	1.025	0.31	0.18	-1.89	0.04	-1.69	-2.47	0.020526	0.999999	0.0355687	0.00238493	0.151182	1	0.270652	0.0458939	46.5	176.5	53.3	31	172.2	23.2	28.44	23.81	16.97	46.97	40.5	56.4	148.1
FALSE	High	IsMasterProtein	P53276	UTP8	D6VUR0; P53276; sce:YGR128C	U3 small nucleolar RNA-associated protein 8 [OS=Saccharomyces cerevisiae S288C]	7.366	0	3	1	2	1	1	80.1	5.44	3	2	1	117	0	0.353	0.34	0.256	0.241	-1.5	-1.56	-1.97	-2.05	0.0916	0.0800054	0.0298217	0.0244546	0.355734	0.417483	0.244751	0.157595	79.3	76.4	57.5	54.1	224.7	5.02	33	18	20.77	15.37	81.1	87	102.6
FALSE	High	IsMasterProtein	P41814	GCD10	D6W1B8; P41814; sce:YNL062C	tRNA (adenine(58)-N(1))-methyltransferase non-catalytic subunit TRM6 [OS=Saccharomyces cerevisiae S288C]	2.868	4	4	2	3	2	2	54.4	4.46	4	3	2	50	0
FALSE	High	IsMasterProtein	P47136	BUD4	D6VWR0; P47136; sce:YJR092W	Bud site selection protein 4 [OS=Saccharomyces cerevisiae S288C]	6.09	0	1	1	1	1	1	164.4	3.91	1	1	1	74	0
FALSE	High	IsMasterProtein	P48363	PAC10	D6VUL0; P48363; sce:YGR078C	Prefoldin subunit 3 [OS=Saccharomyces cerevisiae S288C]	34.101	0	28	6	9	6	6	23.1	24.83	28	9	6	25	0	1.241	0.676	1.358	1.11	0.31	-0.57	0.44	0.15	0.0517351	0.00212366	0.00893155	0.350937	0.268671	0.0805374	0.127268	0.829689	111.2	60.5	121.6	99.4	89.5	4.66	3.38	0.7	3.63	5.86	107.3	114.6	58.9
FALSE	High	IsMasterProtein	P38707	DED81	D3DKW4; P38707; sce:YHR019C	Asparagine--tRNA ligase, cytoplasmic [OS=Saccharomyces cerevisiae S288C]	21.533	0	10	4	5	4	4	62.2	14.86	10	5	4	75	0	0.97	1.031	0.777	0.49	-0.04	0.04	-0.36	-1.03	0.999749	0.999775	0.363511	0.00284966	1	1	0.957969	0.0481508	111.8	118.8	89.5	56.5	115.2	20.14	5.69	18.56	3.28	2.18	99.6	132.7	127.2
FALSE	High	IsMasterProtein	Q04739	GAL83	D3DLS6; Q04739; sce:YER027C	SNF1 protein kinase subunit beta-3 [OS=Saccharomyces cerevisiae S288C]	3.967	3	2	1	1	0	1	46.6	2.91	2	1	1	98	0	9.474	5.007	11.193	7.449	3.24	2.32	3.48	2.9	0.0239336	0.107102	0.0165683	0.0287945	0.167705	0.505978	0.171504	0.167944	151.3	80	178.7	118.9	16	7.59	0.45	12.24	16.75	95.35	139.5	155.4	78.1
FALSE	High	IsMasterProtein	P20049	TYR1	D6VQG2; P20049; sce:YBR166C	Prephenate dehydrogenase [NADP(+)] [OS=Saccharomyces cerevisiae S288C]	2.129	7	4	1	1	1	1	50.9	2.89	4	1	1	50	0
FALSE	High	IsMasterProtein	P39081	PCF11	D6VSL0; P39081; Q04932; sce:YDR228C	Protein PCF11 [OS=Saccharomyces cerevisiae S288C]	8.533	0	3	1	1	1	1	71.9	5.02	3	1	1	74	0	0.465	0.569	0.581	0.722	-1.11	-0.81	-0.78	-0.47	0.057811	0.189617	0.214138	0.369619	0.27677	0.712709	0.664054	0.857965	66.4	81.3	83	103.2	142.8	19.46	0.44	4.48	22.78	31.82	58	76.5	81.2
FALSE	High	IsMasterProtein	P25558	BUD3	D6VQZ9; P25556; P25557; P25558; P87007; sce:YCL014W	Bud site selection protein 3 [OS=Saccharomyces cerevisiae S288C]	6.16	0	2	2	2	2	2	184.6	3.4	2	2	2	61	0	2.035	0.983	1.838	1.053	1.02	-0.02	0.88	0.08	0.875603	1	0.928012	0.841551	1	1	1	1	155	74.9	140	80.3	76.2	0.87	2.16	6.55	122.14	20.67	111.6	110.2	52.8
FALSE	High	IsMasterProtein	Q08951	APL5	D6W3H3; Q02737; Q08951; Q7LIB1; sce:YPL195W	AP-3 complex subunit delta [OS=Saccharomyces cerevisiae S288C]	9.737	0	4	2	2	2	2	106.9	7.06	4	2	2	58	0	0.52	0.586	0.575	0.526	-0.94	-0.77	-0.8	-0.93	0.0776923	0.168911	0.149545	0.0489851	0.336279	0.670645	0.539965	0.247456	73.9	83.4	81.9	74.9	142.3	13.22	16.38	2.24	24.05	8.75	68.2	82.3	95
FALSE	High	IsMasterProtein	P36048	SNU114	D6VX27; P36048; sce:YKL173W	Pre-mRNA-splicing factor SNU114 [OS=Saccharomyces cerevisiae S288C]	33.622	0	8	8	8	8	8	114	20.38	8	8	8	93	0	2.423	1.2	3.509	1.896	1.28	0.26	1.81	0.92	0.373004	0.997063	0.130127	0.974491	0.817904	1	0.491828	1	126.7	62.7	183.5	99.1	52.3	19.15	8.4	12.37	56.59	1.23	151.3	115.2	69.4
FALSE	High	None	P00331	ADH2	D6W0D0; P00331; sce:YMR303C	Alcohol dehydrogenase 2 [OS=Saccharomyces cerevisiae S288C]	11.63	0	12	3	4	0	3	36.7	12.93	12	4	3	49	0	100	100	100	100	6.64	6.64	6.64	6.64									288.2	203.1	87.6	21.1	0	18.19	41.45	2.71			354.7	273.8	162.3
FALSE	High	IsMasterProtein	P33302	PDR5	D6W2L0; P33302; sce:YOR153W	Pleiotropic ABC efflux transporter of multiple drugs [OS=Saccharomyces cerevisiae S288C]	66.507	0	13	17	19	10	17	170.3	52.94	13	19	17	75	0	1.314	1.484	1.021	1.136	0.39	0.57	0.03	0.18	0.923161	0.747598	1	0.999723	1	1	1	1	106	119.7	82.4	91.6	80.6	29.94	16.88	11.74	36.96	17.86	134.8	87.7	138.5
FALSE	High	IsMasterProtein	Q03772	CWC15	D6VSE3; Q03772; sce:YDR163W	Pre-mRNA-splicing factor CWC15 [OS=Saccharomyces cerevisiae S288C]	23.203	0	36	6	6	6	6	19.9	13.59	36	6	6	46	0	1.442	0.254	1.1	0.584	0.53	-1.98	0.14	-0.77	0.996688	0.58045	0.999995	0.56532	1	1	1	1	172.1	30.3	131.3	69.8	119.4	25.98	14.28	5.28	79.39	22	217.9	150.3	35.2
FALSE	High	IsMasterProtein	P29496	MCM5	D6VYS1; P29496; sce:YLR274W	Minichromosome maintenance protein 5 [OS=Saccharomyces cerevisiae S288C]	11.827	0	6	3	4	3	3	86.4	10.98	6	4	3	150	0	1.137	1.664	1.22	1.174	0.18	0.73	0.29	0.23	0.753644	0.00850554	0.381093	0.925737	1	0.141939	0.986208	1	91	133.3	97.8	94	80.1	2.27	5.27	1.97	13.2	13.16	91.3	94.3	141.1
FALSE	Medium	IsMasterProtein	P36158		D6VXD8; P36158; sce:YKR078W	Uncharacterized protein YKR078W [OS=Saccharomyces cerevisiae S288C]	1.173	66	1	1	1	1	1	68.2	0	1	1	1	45	0	0.354	0.399	0.917	1.404	-1.5	-1.33	-0.13	0.49	0.860174	0.907591	0.999998	0.879431	1	1	1	1	40.1	45.2	103.8	159.1	113.3	23.86	68.26	68.47	132.97	57.78	23.4	16.6	37.6
FALSE	Medium	IsMasterProtein	Q06629	HDA2	D6VSS4; Q06629; sce:YDR295C	HDA1 complex subunit 2 [OS=Saccharomyces cerevisiae S288C]	1.659	33	3	1	1	1	1	77	2.47	3	1	1	86	0
FALSE	High	IsMasterProtein	P38853	KEL1	D3DLA7; E9P8X4; P38853; sce:YHR158C	Kelch repeat-containing protein 1 [OS=Saccharomyces cerevisiae S288C]	16.752	0	5	6	6	6	6	131	11.2	5	6	6	71	0	1.716	0.679	1.852	1.095	0.78	-0.56	0.89	0.13	0.536364	0.794491	0.417385	0.990691	0.976716	1	1	1	143.1	56.6	154.5	91.3	83.4	3.08	7.39	15.6	44.33	18.59	145.1	151.6	55.7
FALSE	High	IsMasterProtein	P53254	UTP22	D6VUM2; P53254; sce:YGR090W	U3 small nucleolar RNA-associated protein 22 [OS=Saccharomyces cerevisiae S288C]	9.267	0	3	3	3	3	3	140.4	4.97	3	3	3	139	0	0.483	0.853	0.616	0.702	-1.05	-0.23	-0.7	-0.51	0.159115	0.985768	0.472431	0.766286	0.479519	1	1	1	63.1	111.4	80.4	91.7	130.5	12.78	7.16	11.99	44.98	14.52	56.4	67.7	114.8
FALSE	High	IsMasterProtein	P40693	RLP7	D6W1H5; P40693; sce:YNL002C	Ribosome biogenesis protein RLP7 [OS=Saccharomyces cerevisiae S288C]	2.398	5	8	2	2	2	2	36.5	2.4	8	2	2	77	0	0.819	1.715	1.34	1.282	-0.29	0.78	0.42	0.36	0.996803	0.829263	0.982456	0.991437	1	1	1	1	66.3	138.8	108.5	103.8	81	77.05	23.3	39.29	2.74	49.27	127	37.4	170.6
FALSE	High	IsMasterProtein	P34758	SCD5	D6W326; P34758; sce:YOR329C	Protein SCD5 [OS=Saccharomyces cerevisiae S288C]	22.722	0	8	3	3	3	3	97.2	15.47	8	3	3	73	0	0.568	0.505	0.616	1.059	-0.82	-0.99	-0.7	0.08	0.233307	0.122083	0.354475	0.993219	0.610215	0.548884	0.938842	1	74.7	66.4	81	139.2	131.5	18.44	9.92	29.33	26.05	7.36	61.7	80.2	67
FALSE	High	IsMasterProtein	P20051	URA4	D6VZ56; P20051; sce:YLR420W	Dihydroorotase [OS=Saccharomyces cerevisiae S288C]	5.476	1	7	2	2	2	2	40.3	2.92	7	2	2	70	0	2.273	0.625	1.362	1.034	1.18	-0.68	0.45	0.05	0.0252673	0.21548	0.550554	0.999946	0.172572	0.779546	1	1	192.4	52.9	115.3	87.5	84.6	14.3	5.52	0.03	6.34	19.18	229.2	187.1	54.8
FALSE	High	IsMasterProtein	P25694	CDC48	D6VRM4; P25694; sce:YDL126C	Cell division control protein 48 [OS=Saccharomyces cerevisiae S288C]	41.018	0	10	6	8	6	6	91.9	30.15	10	8	6	329	0	0.931	1.109	1.019	0.616	-0.1	0.15	0.03	-0.7	0.999899	0.999407	1	0.989924	1	1	1	1	95.7	113.9	104.7	63.3	102.8	3.48	6.2	13.77	64.58	14.59	88.5	93	112.9
FALSE	High	IsMasterProtein	P33314	BUD2	D6VXJ6; P33314; sce:YKL092C	Inhibitory regulator protein BUD2/CLA2 [OS=Saccharomyces cerevisiae S288C]	3.357	3	2	1	2	1	1	126.6	5.22	2	2	1	73	0	0.534	0.936	0.562	0.547	-0.9	-0.09	-0.83	-0.87	0.0551693	0.998297	0.0789428	0.0584922	0.275061	1	0.371743	0.274317	68.6	120.2	72.1	70.2	128.4	17.3	12.55	20.38	13	27.69	61.2	78.3	132.6
FALSE	High	IsMasterProteinCandidate	Q12088	TY1B-LR1	D6VY38; Q12088; sce:YLR035C-A	Transposon Ty1-LR1 Gag-Pol polyprotein [OS=Saccharomyces cerevisiae S288C]	83.944	0	13	17	22	0	2	198.3	69.84	13	22	17	97	0	0.823	0.794	0.464	3.415	-0.28	-0.33	-1.11	1.77	0.999906	0.999786	0.949347	0.999119	1	1	1	1	61	58.8	34.4	253.1	74.1	15.42	4.46	39.15	79.75	7.12	71.9	57.8	60.3
FALSE	High	IsMasterProtein	P43558	OTU1	D6VTI6; P43558; sce:YFL044C	Ubiquitin thioesterase OTU1 [OS=Saccharomyces cerevisiae S288C]	6.004	0	7	1	1	1	1	33.5	5	7	1	1	82	0	0.466	0.536	0.555	0.638	-1.1	-0.9	-0.85	-0.65	0.509087	0.683275	0.725082	0.999286	0.954228	1	1	1	68.3	78.6	81.3	93.5	146.6	7.82	5.28	22.04	80.53	7.06	56.2	62.8	71
FALSE	High	IsMasterProtein	Q05533	INM2	D6VSR7; Q05533; sce:YDR287W	Inositol monophosphatase 2 [OS=Saccharomyces cerevisiae S288C]	3.755	3	5	1	1	1	1	32.1	2.5	5	1	1	75	0	0.208	0.353	0.295	0.299	-2.27	-1.5	-1.76	-1.74	0.404445	0.750462	0.628805	0.945798	0.856085	1	1	1	45	76.4	63.9	64.8	216.5	51.42	9.41	10.86	128.74	32.46	22.7	48.7	60.4
FALSE	High	IsMasterProtein	P53281	LSB1	D6VUR8; P53281; sce:YGR136W	LAS seventeen-binding protein 1 [OS=Saccharomyces cerevisiae S288C]	26.045	0	30	4	6	4	4	26.1	25.83	30	6	4	97	0	0.885	0.627	1.007	1.636	-0.18	-0.67	0.01	0.71	0.997045	0.586697	1	0.604495	1	1	1	1	85.7	60.7	97.5	158.4	96.8	7.01	0.52	5.85	42.32	27.56	77.9	86	58.2
FALSE	Low	IsMasterProtein	Q06218	DBP9	D6VYS3; Q06218; Q66R46; sce:YLR276C	ATP-dependent RNA helicase DBP9 [OS=Saccharomyces cerevisiae S288C]	1.158	68	3	1	1	1	1	68	0	3	1	1	85	0	0.036	0.119	0.219	0.052	-4.79	-3.07	-2.19	-4.25	0.00154139	0.0154468	0.068953	0.00293431	0.0368971	0.177847	0.353481	0.0488627	13	42.9	79	18.9	360.5	31.5	14.16	27.73	63.65	26.89	10.9	17.2	50
FALSE	High	None	P38781	RSC30	D3DL05; P38781; sce:YHR056C	Chromatin structure-remodeling complex protein RSC30 [OS=Saccharomyces cerevisiae S288C]	2.925	4	1	1	2	0	0	101.3	1.89	1	2	1	103	0	9.172	1.738	13.638	4.76	3.2	0.8	3.77	2.25	0.00136718	0.411656	0.000547888	0.00870487	0.0349086	1	0.0354348	0.100109	158.3	30	235.3	82.1	17.3	1.96	16.67	21.92	19.25	53.39	167.6	172.3	36.3
FALSE	High	IsMasterProtein	P22515	UBA1	D6VWZ3; P22515; sce:YKL210W	Ubiquitin-activating enzyme E1 1 [OS=Saccharomyces cerevisiae S288C]	27.717	0	11	6	6	6	6	114.2	20.49	11	6	6	70	0	0.6	1.396	0.946	0.675	-0.74	0.48	-0.08	-0.57	0.660996	0.905638	0.999973	0.999908	1	1	1	1	62	144.3	97.8	69.8	103.4	28.54	5.07	14.29	63.15	2.56	47.2	71	139.7
FALSE	High	IsMasterProtein	P38129	TAF5	D6VQJ4; P38129; sce:YBR198C	Transcription initiation factor TFIID subunit 5 [OS=Saccharomyces cerevisiae S288C]	4.818	1	2	2	2	2	2	88.9	4.49	2	2	2	137	0	2.945	2.88	2.609	1.271	1.56	1.53	1.38	0.35	0.00648488	0.00721572	0.0117953	0.746557	0.0795459	0.131487	0.147313	1	148.4	145.1	131.4	64	50.4	10.98	15.04	14.44	19.2	14.28	172.6	147.8	173.8
FALSE	High	IsMasterProtein	P47160	ENT3	D6VWU4; P47160; sce:YJR125C	Epsin-3 [OS=Saccharomyces cerevisiae S288C]	139.021	0	46	19	30	19	19	45.1	105.19	46	30	19	82	0	2.748	0.603	2.371	1.24	1.46	-0.73	1.25	0.31	0.136479	0.683827	0.231411	0.999749	0.433189	1	0.701559	1	186.8	41	161.1	84.3	68	10.36	1.31	8.13	49.19	15.72	210.1	181.4	42.5
FALSE	Low	IsMasterProtein	P32479	HIR1	D6VPZ2; P32479; sce:YBL008W	Protein HIR1 [OS=Saccharomyces cerevisiae S288C]	1.13	70	2	1	1	1	1	93.8	2	2	1	1	108	0
FALSE	High	IsMasterProtein	Q12532	RQC2	D6W403; Q12532; sce:YPL009C	Ribosome quality control complex subunit 2 [OS=Saccharomyces cerevisiae S288C]	14.372	0	4	3	4	3	3	119	12.6	4	4	3	72	0	1.305	1.466	1.285	1.061	0.38	0.55	0.36	0.09	0.835513	0.582319	0.8631	0.999728	1	1	1	1	98.8	111	97.3	80.3	75.7	8.28	24.58	14.52	24.12	38.31	112.2	99.8	141.7
FALSE	High	IsMasterProtein	Q05518	PAL1	D6VSX8; Q05518; Q66RD5; sce:YDR348C	Protein PAL1 [OS=Saccharomyces cerevisiae S288C]	48.166	0	24	8	11	8	8	55	37.02	24	11	8	15	0	1.088	0.837	1.047	1.001	0.12	-0.26	0.07	0	0.999603	0.986823	0.99998	0.93963	1	1	1	1	113.6	87.4	109.4	104.5	104.5	0.1	15.13	1.18	57.97	6.25	103.3	103.1	71.3
FALSE	High	IsMasterProtein	Q03735	NAB6	D6W0G7; Q03735; sce:YML117W	RNA-binding protein NAB6 [OS=Saccharomyces cerevisiae S288C]	56.565	0	14	14	14	14	14	126.1	43.17	14	14	14	14	0	1.575	1.321	2.064	5.368	0.66	0.4	1.05	2.42	0.969851	0.996487	0.833295	0.498601	1	1	1	1	73.4	61.6	96.2	250.1	46.6	17.93	8.98	1.08	69.44	11.27	87.4	67.7	68.8
FALSE	High	IsMasterProteinCandidate	P34219	TOD6	D6VPU6; P34219; sce:YBL054W	Transcriptional regulatory protein TOD6 [OS=Saccharomyces cerevisiae S288C]	3.061	3	2	1	1	0	1	59.2	0	2	1	1	27	0
FALSE	High	IsMasterProtein	P40357	SEC9	D6VUE6; P40357; sce:YGR009C	Protein transport protein SEC9 [OS=Saccharomyces cerevisiae S288C]	41.5	0	15	9	10	9	9	73.6	27.24	15	10	9	79	0	3.016	1.231	2.457	1.686	1.59	0.3	1.3	0.75	0.445591	0.998702	0.627694	0.410111	0.898634	1	1	0.914378	176.5	72	143.8	98.6	58.5	5.52	8.64	8.03	109.3	7.42	136.5	126.3	50.4
FALSE	High	IsMasterProtein	P07342	ILV2	D6VZT1; P07342; sce:YMR108W	Acetolactate synthase catalytic subunit, mitochondrial [OS=Saccharomyces cerevisiae S288C]	10.488	0	5	2	2	2	2	74.9	7.89	5	2	2	61	0	2.088	2.851	2.183	3.731	1.06	1.51	1.13	1.9	0.0874303	0.0191872	0.0695085	0.00621012	0.354973	0.194929	0.353481	0.0829701	79.1	108	82.7	141.3	37.9	11.12	16.02	28.18	8.16	0.41	78.1	91.4	129.3
FALSE	High	None	Q07793	TY1B-DR4	D6VSP4; Q07793; sce:YDR261C-D	Transposon Ty1-DR4 Gag-Pol polyprotein [OS=Saccharomyces cerevisiae S288C]	75.604	0	12	15	20	0	0	181.5	60.26	12	20	15	97	0
FALSE	High	IsMasterProtein	P34110	VPS35	D6VW33; P34110; sce:YJL154C	Vacuolar protein sorting-associated protein 35 [OS=Saccharomyces cerevisiae S288C]	102.521	0	23	21	30	21	21	109.1	79.31	23	30	21	86	0	1.031	0.465	0.849	0.594	0.04	-1.1	-0.24	-0.75	0.99989	0.00720677	0.831595	0.0762107	1	0.131487	1	0.328912	135.6	61.2	111.7	78.1	131.6	16.25	1.42	14.72	16.94	16.96	151.5	120.2	61.5
FALSE	High	IsMasterProtein	P02992	TUF1	D6W2P3; P02992; sce:YOR187W	Elongation factor Tu, mitochondrial [OS=Saccharomyces cerevisiae S288C]	11.87	0	8	2	2	2	2	47.9	8.51	8	2	2	87	0	0.623	0.993	0.651	1.16	-0.68	-0.01	-0.62	0.21	0.854597	1	0.895195	0.993737	1	1	1	1	69	110	72.1	128.4	110.7	1.26	25.83	10.35	71.83	17.78	63.1	62	119.9
FALSE	High	IsMasterProtein	P22517	CMK2	D6W250; P22517; sce:YOL016C	Calcium/calmodulin-dependent protein kinase II [OS=Saccharomyces cerevisiae S288C]	70.53	0	36	12	15	11	11	50.4	51.88	36	15	12	55	1	3.549	0.804	1.743	1.123	1.83	-0.31	0.8	0.17	0.102765	0.991484	0.726316	0.785484	0.372166	1	1	1	228.2	51.7	112.1	72.2	64.3	17.42	11.3	4	76.79	21.46	235.1	183.5	51
FALSE	High	IsMasterProtein	Q9P305	IGO2	D3DL81; Q9P305; sce:YHR132W-A	mRNA stability protein IGO2 [OS=Saccharomyces cerevisiae S288C]	3.073	3	9	1	1	1	1	14.4	2.75	9	1	1	91	0	1.053	0.227	0.753	1.497	0.08	-2.14	-0.41	0.58	0.999881	0.00572697	0.820085	0.568646	1	0.12455	1	1	119.3	25.8	85.2	169.5	113.2	18.59	3.9	15.08	24.35	25.02	145.3	111.5	28.3
FALSE	High	IsMasterProtein	Q08963	LEA1	D6W3F7; Q08963; sce:YPL213W	U2 small nuclear ribonucleoprotein A' [OS=Saccharomyces cerevisiae S288C]	62.52	0	36	7	11	7	7	27.2	43.66	36	11	7	62	0	1.45	0.943	2.164	1.42	0.54	-0.09	1.11	0.51	0.263781	0.998368	0.0121201	0.384273	0.652127	1	0.148149	0.878253	101.7	66.1	151.8	99.6	70.1	15.37	1.6	6.86	16.22	24.88	91.9	114.3	67.4
FALSE	Medium	IsMasterProtein	P38779	CIC1	D3DL01; P38779; sce:YHR052W	Proteasome-interacting protein CIC1 [OS=Saccharomyces cerevisiae S288C]	1.914	17	6	1	1	1	1	42.5	0	6	1	1	93	0	0.279	0.542	0.273	0.334	-1.84	-0.88	-1.87	-1.58	0.0101371	0.206718	0.00935458	0.0213157	0.101145	0.758185	0.129499	0.148435	56.9	110.6	55.7	68.2	204	24.8	9.01	26.11	27.06	18.22	51	72.7	126.4
FALSE	High	IsMasterProtein	P15625	FRS2	D6VTK8; P15625; sce:YFL022C	Phenylalanine--tRNA ligase alpha subunit [OS=Saccharomyces cerevisiae S288C]	25.588	0	14	7	8	7	7	57.5	18.69	14	8	7	88	0	9.724	5.02	6.829	5.422	3.28	2.33	2.77	2.44	0.0110513	0.0533514	0.0247666	0.0437772	0.102306	0.335178	0.216749	0.229842	186.4	96.2	130.9	103.9	19.2	12.36	3.3	7.08	35.55	56.97	180.7	215.3	99.5
FALSE	High	IsMasterProtein	P30624	FAA1	D6W316; P30624; sce:YOR317W	Long-chain-fatty-acid--CoA ligase 1 [OS=Saccharomyces cerevisiae S288C]	67.965	0	19	11	17	10	11	77.8	55.89	19	17	11	100	0	0.532	1.588	0.772	0.862	-0.91	0.67	-0.37	-0.21	0.279323	0.549002	0.91245	0.996391	0.679962	1	1	1	49.7	148.3	72.1	80.5	93.4	10.35	28.46	5.96	43.06	12.82	45.7	52.9	179.9
FALSE	High	IsMasterProtein	P24276	SSD1	D6VSS2; P24276; sce:YDR293C	Protein SSD1 [OS=Saccharomyces cerevisiae S288C]	30.805	0	9	8	8	8	8	139.9	23.61	9	8	8	129	0	0.756	0.964	0.951	0.714	-0.4	-0.05	-0.07	-0.49	0.94763	0.999996	0.999983	0.593744	1	1	1	1	83.1	106	104.6	78.5	109.9	2	15.96	1.03	51.58	3.05	86.4	84	121.7
FALSE	High	IsMasterProtein	P38151	PBP2	D6VQM8; P38151; sce:YBR233W	PAB1-binding protein 2 [OS=Saccharomyces cerevisiae S288C]	5.039	1	4	2	2	2	2	45.8	2.67	4	2	2	50	0	11.257	7.911	9.006	14.701	3.49	2.98	3.17	3.88	0.133436	0.226665	0.186901	0.0228126	0.425885	0.805607	0.617096	0.151513	146.8	103.1	117.4	191.7	13	7.53	44.91	1.43	131.36	52.63	70.3	63.2	33.7
FALSE	High	IsMasterProtein	P00359	TDH3	D6VUX4; P00359; Q6Q5P9; sce:YGR192C	Glyceraldehyde-3-phosphate dehydrogenase 3 [OS=Saccharomyces cerevisiae S288C]	77.572	0	55	15	23	2	3	35.7	67.39	55	23	15	115	0	0.535	1.577	0.688	0.913	-0.9	0.66	-0.54	-0.13	0.221256	0.483946	0.657735	0.852212	0.589845	1	1	1	57.7	170.2	74.3	98.5	107.9	10.55	17.09	1.65	29.68	34.54	54.6	63.4	196.1
FALSE	High	IsMasterProtein	P36054	RCN1	D6VX40; P36054; sce:YKL159C	Calcipressin-like protein [OS=Saccharomyces cerevisiae S288C]	4.177	3	7	1	1	1	1	24.1	3.27	7	1	1	37	0	0.528	0.926	0.62	0.428	-0.92	-0.11	-0.69	-1.22	0.181531	0.999238	0.403876	0.0641075	0.518567	1	1	0.295233	74.7	131.1	87.7	60.6	141.5	19.18	32.16	9.8	28.07	22.98	65.4	85.9	104.3
FALSE	High	IsMasterProtein	P38426	TPS3	D6W087; P38426; Q6B1W2; sce:YMR261C	Trehalose synthase complex regulatory subunit TPS3 [OS=Saccharomyces cerevisiae S288C]	174.268	0	32	28	44	27	27	118.8	127.45	32	44	28	44	0	1.634	0.757	1.58	0.77	0.71	-0.4	0.66	-0.38	0.00711607	0.109907	0.0105646	0.0820306	0.0834323	0.510825	0.141148	0.340507	149.7	69.3	144.7	70.5	91.6	19.63	9.09	5.12	4.77	0.67	176	133.1	75.6
FALSE	Medium	IsMasterProtein	P53113		P53113	Putative uncharacterized protein YGL152C [OS=Saccharomyces cerevisiae S288C]	1.47	48	3	1	1	1	1	24.1	1.61	3	1	1	5	0
FALSE	High	IsMasterProtein	Q12038	SRO7	D6W442; Q12038; sce:YPR032W	Lethal(2) giant larvae protein homolog SRO7 [OS=Saccharomyces cerevisiae S288C]	96.894	0	22	20	27	20	20	114.4	81.37	22	27	20	74	0	2.777	1.184	2.589	1.35	1.47	0.24	1.37	0.43	0.000674271	0.749467	0.00105153	0.329031	0.0249915	1	0.0455965	0.804377	165	70.3	153.8	80.2	59.4	10.59	5.87	0.04	18.62	6.88	181.5	156.2	74.8
FALSE	High	IsMasterProtein	P47135	JSN1	D6VWQ9; P47135; sce:YJR091C	Protein JSN1 [OS=Saccharomyces cerevisiae S288C]	41.876	0	10	9	11	9	9	120.3	28.7	10	11	9	127	0	1.589	0.774	2.226	2.835	0.67	-0.37	1.15	1.5	0.0567357	0.408701	0.00318196	0.000335884	0.275061	1	0.0723333	0.0173549	103.9	50.7	145.6	185.4	65.4	2.54	16.2	5.84	19.32	6.67	98.4	94.9	52.9
FALSE	High	IsMasterProtein	P53152	MMS2	D6VU57; P53152; sce:YGL087C	Ubiquitin-conjugating enzyme variant MMS2 [OS=Saccharomyces cerevisiae S288C]	5.867	0	15	1	1	1	1	15.5	3.7	15	1	1	106	0	0.259	0.549	0.451	0.291	-1.95	-0.86	-1.15	-1.78	0.00498639	0.170662	0.0601989	0.0079354	0.0690284	0.673265	0.32976	0.0967009	46.4	98.5	80.9	52.2	179.3	16	8.9	0.8	14.32	21.57	44.3	55.5	112.1
FALSE	High	IsMasterProtein	Q02931	NAN1	D6W3P1; Q02931; sce:YPL126W	NET1-associated nuclear protein 1 [OS=Saccharomyces cerevisiae S288C]	13.78	0	5	4	4	4	4	101.2	11.11	5	4	4	98	0	1.044	1.171	1.118	0.764	0.06	0.23	0.16	-0.39	0.999998	0.998885	0.999797	0.998224	1	1	1	1	103.9	116.5	111.2	76	99.5	10.82	12.45	6.59	87.91	8.79	97.5	83.6	110.6
FALSE	High	IsMasterProtein	P20459	SUI2	D6VWI2; E9P8T6; P20459; sce:YJR007W	Eukaryotic translation initiation factor 2 subunit alpha [OS=Saccharomyces cerevisiae S288C]	11.645	0	11	2	3	2	2	34.7	13.34	11	3	2	87	0	0.878	1.731	1.082	1.026	-0.19	0.79	0.11	0.04	0.97867	0.154948	0.997792	0.9893	1	0.637565	1	1	75.4	148.7	92.9	88.1	85.9	17.84	35.09	3.23	20.72	11.25	65.2	84	188
FALSE	High	IsMasterProtein	P54964	REX2	D6VY61; E9P909; P54964; sce:YLR059C	Oligoribonuclease, mitochondrial [OS=Saccharomyces cerevisiae S288C]	12.816	0	10	2	2	2	2	30.9	7.93	10	2	2	73	0	0.974	0.723	0.939	0.619	-0.04	-0.47	-0.09	-0.69	0.999987	0.529071	0.99901	0.142474	1	1	1	0.49313	109.4	81.2	105.4	69.5	112.3	16.47	2.19	23.72	24.97	13.02	99	125.1	81.3
FALSE	High	IsMasterProtein	P53303	ZPR1	D6VUZ4; P53303; Q02807; Q02808; sce:YGR211W	Zinc finger protein ZPR1 [OS=Saccharomyces cerevisiae S288C]	12.739	0	10	2	2	2	2	55	9.33	10	2	2	35	0	0.508	0.422	0.642	0.661	-0.98	-1.24	-0.64	-0.6	0.0683591	0.0239746	0.280229	0.333011	0.308477	0.218435	0.80295	0.805537	75.8	62.9	95.7	98.5	149.1	23.09	11.09	17.98	17.16	5.33	69.1	96	73.2
FALSE	High	IsMasterProtein	P38801	LRP1	D3DL32; P38801; sce:YHR081W	Exosome complex protein LRP1 [OS=Saccharomyces cerevisiae S288C]	3.171	3	6	1	1	1	1	21	2.79	6	1	1	133	0	1.036	1.017	1.568	0.902	0.05	0.02	0.65	-0.15	0.999998	1	0.815701	0.998529	1	1	1	1	98.6	96.8	149.3	85.9	95.3	1.07	6.62	5.74	47.42	62.38	90.8	92.2	85.7
FALSE	High	IsMasterProtein	P53173	ERV14	D6VU87; P53173; sce:YGL054C	ER-derived vesicles protein ERV14 [OS=Saccharomyces cerevisiae S288C]	6.466	0	8	1	1	1	1	15.9	4	8	1	1	99	0	0.878	1.822	1.1	0.925	-0.19	0.87	0.14	-0.11	0.987157	0.190704	0.996836	0.998785	1	0.713123	1	1	75.7	157	94.8	79.7	86.2	11.85	32.19	11.22	7.63	12.13	87.9	74.3	211.4
FALSE	High	IsMasterProtein	P23639	PRE8	D6W0J3; P23639; sce:YML092C	Proteasome subunit alpha type-2 [OS=Saccharomyces cerevisiae S288C]	7.704	0	7	2	2	2	2	27.1	4.93	7	2	2	51	0	3.894	1.279	2.683	1.98	1.96	0.36	1.42	0.99	0.0305559	0.96598	0.122923	0.0972867	0.194845	1	0.473953	0.386977	138.9	45.6	95.7	70.6	35.7	12.52	1.68	8.46	62.73	12.77	120	143.3	43.6
FALSE	High	IsMasterProtein	P47083	MPP10	D6VWH6; P47083; sce:YJR002W	U3 small nucleolar RNA-associated protein MPP10 [OS=Saccharomyces cerevisiae S288C]	10.109	0	7	2	2	2	2	66.9	8.39	7	2	2	72	0
FALSE	High	IsMasterProtein	P49687	NUP145	D6VU53; P49687; sce:YGL092W	Nucleoporin NUP145 [OS=Saccharomyces cerevisiae S288C]	2.272	5	1	1	1	1	1	145.6	1.95	1	1	1	163	0	3.956	6.614	6.267	3.725	1.98	2.73	2.65	1.9	0.086323	0.0223031	0.0254969	0.102161	0.354344	0.208162	0.22027	0.39791	100.3	167.7	158.9	94.5	25.4	5.09	3.78	7.9	21.45	68.09	103.2	110.9	183.7
FALSE	High	IsMasterProtein	P16861	PFK1	D6VV20; P16861; sce:YGR240C	ATP-dependent 6-phosphofructokinase subunit alpha [OS=Saccharomyces cerevisiae S288C]	250.655	0	47	36	55	36	36	107.9	203.88	47	55	36	155	0	0.796	1.289	0.902	0.913	-0.33	0.37	-0.15	-0.13	0.77831	0.704986	0.988905	0.733078	1	1	1	1	80.1	129.7	90.8	91.9	100.6	1.11	19.72	3.06	26.09	4.75	81.5	82.8	153.1
FALSE	High	IsMasterProtein	Q02630	NUP116	D6VZM2; Q02630; sce:YMR047C	Nucleoporin NUP116/NSP116 [OS=Saccharomyces cerevisiae S288C]	3.936	3	2	2	2	1	1	116.2	4.16	2	2	2	88	0
FALSE	Medium	None	P40458	ATG32	D6VVE1; P40458; sce:YIL146C	Autophagy-related protein 32 [OS=Saccharomyces cerevisiae S288C]	1.826	22	1	1	1	0	0	58.9	2.56	1	1	1	56	0	4.717	2.422	6.832	2.425	2.24	1.28	2.77	1.28	0.124055	0.52822	0.0543873	0.527079	0.406999	1	0.310901	1	138	70.9	199.9	71	29.3	4.75	5.96	20.03	70.88	19.22	146.9	137.4	69.9
FALSE	High	IsMasterProtein	P38079	YRO2	D6VQ53; P38079; sce:YBR054W	Protein YRO2 [OS=Saccharomyces cerevisiae S288C]	7.707	0	8	2	2	1	2	38.7	7.03	8	2	2	8	0
FALSE	Medium	IsMasterProtein	Q00772	SLT2	D3DKX7; Q00772; sce:YHR030C	Mitogen-activated protein kinase SLT2/MPK1 [OS=Saccharomyces cerevisiae S288C]	1.553	38	2	1	1	1	1	55.6	2.2	2	1	1	142	0	22.757	20.362	22.753	17.633	4.51	4.35	4.51	4.14	0.0353987	0.0420229	0.035407	0.0248177	0.213322	0.290616	0.270652	0.157595	155.1	138.8	155.1	120.2	6.8	1.33	9.52	2.86	96.38	15.3	125.3	127.7	121.1
FALSE	High	None	P50094	IMD4	D6VZB8; P50094; Q2VQW8; sce:YML056C	Inosine-5'-monophosphate dehydrogenase 4 [OS=Saccharomyces cerevisiae S288C]	22.16	0	5	2	4	0	0	56.4	14.18	5	4	2	85	0	0.311	0.679	0.66	0.689	-1.68	-0.56	-0.6	-0.54	0.0459655	0.788269	0.740173	0.559029	0.250798	1	1	1	39	85.1	82.6	86.3	125.2	52.17	29.63	6.95	18.73	37.75	26.8	58	69.6
FALSE	High	IsMasterProtein	P19524	MYO2	D6W323; P19524; sce:YOR326W	Myosin-2 [OS=Saccharomyces cerevisiae S288C]	26.451	0	4	5	6	4	5	180.6	21.66	4	6	5	175	0	0.561	0.899	0.719	0.604	-0.83	-0.15	-0.48	-0.73	0.713779	0.999738	0.955854	0.372309	1	1	1	0.86073	70	112.2	89.8	75.4	124.8	1.85	19.81	2.02	56.3	18.28	71.6	73.5	133.9
FALSE	High	IsMasterProtein	P04801	THS1	D6VVK6; P04801; sce:YIL078W	Threonine--tRNA ligase, cytoplasmic [OS=Saccharomyces cerevisiae S288C]	46.082	0	17	11	12	11	11	84.5	32.71	17	12	11	75	0	1.688	0.932	1.329	0.931	0.76	-0.1	0.41	-0.1	0.00342866	0.949211	0.0789029	0.657542	0.0552424	1	0.371743	1	141.8	78.3	111.6	78.2	84	6.4	12.16	3.4	9.16	6.5	138.7	151.9	87.4
FALSE	High	IsMasterProteinCandidate	Q04711	TY1B-ML1	D6VZD0; Q04711; sce:YML045W	Transposon Ty1-ML1 Gag-Pol polyprotein [OS=Saccharomyces cerevisiae S288C]	83.944	0	13	17	22	0	2	198.4	69.84	13	22	17	97	0	0.823	0.794	0.464	3.415	-0.28	-0.33	-1.11	1.77	0.999906	0.999786	0.949347	0.999119	1	1	1	1	61	58.8	34.4	253.1	74.1	15.42	4.46	39.15	79.75	7.12	71.9	57.8	60.3
FALSE	High	IsMasterProtein	P18961	YPK2	D6VZS6; P18961; sce:YMR104C	Serine/threonine-protein kinase YPK2/YKR2 [OS=Saccharomyces cerevisiae S288C]	13.522	0	7	4	4	1	1	76.6	8.97	7	4	4	73	0
FALSE	High	IsMasterProtein	P10664	RPL4A	D6VQ32; P10664; sce:YBR031W	60S ribosomal protein L4-A [OS=Saccharomyces cerevisiae S288C]	65.132	0	31	9	25	0	9	39.1	97.76	31	25	9	55	0	0.521	1.069	0.69	0.866	-0.94	0.1	-0.53	-0.21	0.245787	0.999776	0.721373	0.963881	0.62531	1	1	1	60.6	124.3	80.3	100.7	116.3	15.8	7.38	23.71	40.29	17.85	53.7	67.2	129.9
FALSE	High	IsMasterProtein	P32804	ZRT1	D6VV80; P32804; sce:YGL255W	Zinc-regulated transporter 1 [OS=Saccharomyces cerevisiae S288C]	3.862	3	2	1	1	1	1	41.6	2.1	2	1	1	42	0
FALSE	High	IsMasterProtein	P38631	FKS1	D6VYY0; P38631; Q53YZ4; Q6TKS9; Q6TKT0; sce:YLR342W	1,3-beta-glucan synthase component FKS1 [OS=Saccharomyces cerevisiae S288C]	135.265	0	20	30	33	14	14	214.7	102.25	20	33	30	138	13	0.737	1.204	0.857	0.784	-0.44	0.27	-0.22	-0.35	0.377938	0.787567	0.880668	0.158037	0.825571	1	1	0.530515	79.4	129.8	92.3	84.5	107.8	11.13	8.16	2.54	21.71	2.89	88.7	75.8	142
FALSE	High	IsMasterProtein	P39730	FUN12	D6VPI2; P39730; sce:YAL035W	Eukaryotic translation initiation factor 5B [OS=Saccharomyces cerevisiae S288C]	311.549	0	53	50	94	47	50	112.2	289.48	53	94	50	136	0	0.978	0.94	1.236	0.493	-0.03	-0.09	0.31	-1.02	0.999981	0.997359	0.688497	0.0223637	1	1	1	0.151337	108.8	104.6	137.5	54.9	111.2	13.91	5.6	14.29	22.08	9.05	121.8	100	102
FALSE	High	IsMasterProtein	Q02796	LGE1	D6W3V9; Q02796; Q6Q5I8; sce:YPL055C	Transcriptional regulatory protein LGE1 [OS=Saccharomyces cerevisiae S288C]	6.526	0	12	4	4	4	4	37.3	4.25	12	4	4	54	0	0.607	0.483	0.563	0.711	-0.72	-1.05	-0.83	-0.49	0.0800524	0.0129919	0.0425356	0.269916	0.340206	0.171592	0.276497	0.729726	87	69.2	80.6	101.9	143.3	17.38	0.46	6.56	6.91	8.25	76	97.3	68.1
FALSE	High	IsMasterProtein	P00931	TRP5	D6VUB2; P00931; sce:YGL026C	Tryptophan synthase [OS=Saccharomyces cerevisiae S288C]	140.468	0	37	20	33	20	20	76.6	115.66	37	33	20	52	0	1.463	1.135	1.537	1.29	0.55	0.18	0.62	0.37	0.17164	0.927518	0.110017	0.311548	0.500543	1	0.440451	0.777386	113.1	87.7	118.9	99.7	77.3	0.28	10.62	2.67	19.72	16.85	111.6	112	93.5
FALSE	High	IsMasterProtein	Q06168	SFH1	D6VYW4; Q06168; sce:YLR321C	Chromatin structure-remodeling complex subunit SFH1 [OS=Saccharomyces cerevisiae S288C]	7.524	0	4	2	2	2	2	48.7	4.59	4	2	2	113	0
FALSE	High	IsMasterProtein	P06101	CDC37	D6VSE8; P06101; Q04132; sce:YDR168W	Hsp90 co-chaperone Cdc37 [OS=Saccharomyces cerevisiae S288C]	55.663	0	32	13	15	13	13	58.3	40.24	32	15	13	71	0	1.165	0.486	0.769	0.423	0.22	-1.04	-0.38	-1.24	0.846684	0.0079404	0.432774	0.00215908	1	0.138811	1	0.042772	156.8	65.4	103.4	56.9	134.6	6.77	9.11	10.41	17.1	10.88	168.6	153.2	62.8
FALSE	High	IsMasterProtein	P19073	CDC42	D6VYN1; P19073; Q05978; sce:YLR229C	Cell division control protein 42 [OS=Saccharomyces cerevisiae S288C]	2.09	8	6	1	1	1	1	21.3	2.39	6	1	1	175	0
FALSE	High	IsMasterProtein	Q00816	REG1	D6VS13; Q00816; sce:YDR028C	Resistance to glucose repression protein 1 [OS=Saccharomyces cerevisiae S288C]	72.349	0	15	15	18	15	15	112.5	53.69	15	18	15	99	0	1.591	0.572	1.29	0.675	0.67	-0.81	0.37	-0.57	0.690248	0.534802	0.957203	0.29126	1	1	1	0.75913	162.4	58.4	131.6	68.8	102	7.11	0.53	3.27	47.21	1.79	179.7	162.5	61.2
FALSE	High	IsMasterProtein	P32602	SEC17	D6VPU9; P32602; sce:YBL050W	Alpha-soluble NSF attachment protein [OS=Saccharomyces cerevisiae S288C]	9.653	0	8	1	1	1	1	32.8	6.29	8	1	1	65	0	0.614	0.759	0.718	0.778	-0.7	-0.4	-0.48	-0.36	0.393324	0.837552	0.722482	0.788464	0.844727	1	1	1	72.6	89.8	84.9	92	118.3	13.44	4.48	1.11	34	26.96	65.8	79.6	86.6
FALSE	High	IsMasterProtein	P16862	PFK2	D6W030; P16862; sce:YMR205C	ATP-dependent 6-phosphofructokinase subunit beta [OS=Saccharomyces cerevisiae S288C]	161.57	0	37	29	47	29	29	104.6	145	37	47	29	168	0	1.098	1.384	1.142	0.806	0.13	0.47	0.19	-0.31	0.974358	0.247961	0.898944	0.477319	1	0.8472	1	1	98.2	123.8	102.2	72.2	89.5	11.97	26.28	1.04	12.15	6.09	108.9	91.9	152.2
FALSE	Medium	IsMasterProtein	P39012	GAA1	D6VY88; P39012; sce:YLR088W	GPI transamidase component GAA1 [OS=Saccharomyces cerevisiae S288C]	1.925	17	1	1	2	1	1	69.2	4.27	1	2	1	85	0	2.195	0.999	2.02	1.837	1.13	0	1.01	0.88	0.159138	1	0.224706	0.330887	0.479519	1	0.686669	0.805124	139.6	63.6	128.5	116.8	63.6	15.37	28.99	4.06	19.11	50.46	166.5	133.8	83.7
FALSE	High	IsMasterProtein	Q06704	IMH1	D6VYV3; Q06704; sce:YLR309C	Golgin IMH1 [OS=Saccharomyces cerevisiae S288C]	46.796	0	15	11	12	11	11	105.2	36.18	15	12	11	46	0	3.725	2.025	2.785	1.664	1.9	1.02	1.48	0.73	0.239144	0.755699	0.446075	0.465227	0.621667	1	1	0.996671	180.1	97.9	134.7	80.5	48.4	2.63	11.78	22.94	100.29	10.9	148.7	154.3	75.7
FALSE	High	IsMasterProtein	P38250	IST2	D6VQ87; P38250; P89499; sce:YBR086C	Increased sodium tolerance protein 2 [OS=Saccharomyces cerevisiae S288C]	4.506	1	2	2	2	2	2	105.8	4.93	2	2	2	81	0	0.242	0.839	0.361	0.295	-2.05	-0.25	-1.47	-1.76	0.000376157	0.861366	0.00295648	0.000651252	0.0217506	1	0.0723333	0.0187072	42.4	147.2	63.4	51.8	175.6	6.33	3.18	2.37	19.5	28.84	41.6	45.5	154.5
FALSE	High	IsMasterProtein	P05740	RPL17A	D6VX21; P05740; sce:YKL180W	60S ribosomal protein L17-A [OS=Saccharomyces cerevisiae S288C]	35.939	0	37	6	8	1	6	20.5	24.63	37	8	6	75	0	0.448	1.678	0.639	0.737	-1.16	0.75	-0.65	-0.44	0.112527	0.418055	0.547213	0.918992	0.387106	1	1	1	51	190.9	72.6	83.8	113.8	14.89	30.84	5.47	30.53	24.42	55.3	44.8	232.6
FALSE	High	None	P0CX74	TY1A-JR1	D6VWK0; P0CX74; P47097; Q66R50; sce:YJR026W; sce:YLR227W-A; sce:YML040W	Transposon Ty1-JR1 Gag polyprotein [OS=Saccharomyces cerevisiae S288C]	69.098	0	38	13	18	0	3	49	56.12	38	18	13	21	0	1.487	1.163	1.427	3.794	0.57	0.22	0.51	1.92	0.118019	0.835584	0.175461	7.20385e-05	0.394197	1	0.591669	0.00752475	86.1	67.3	82.6	219.6	57.9	10.46	6.39	2.92	15.73	14.99	83.4	71.9	63.4
FALSE	High	IsMasterProtein	P49090	ASN2	D6VUQ6; E9P8Y0; P49090; sce:YGR124W	Asparagine synthetase [glutamine-hydrolyzing] 2 [OS=Saccharomyces cerevisiae S288C]	31.389	0	16	8	10	3	3	64.6	28.21	16	10	8	64	0	3.207	3.328	3.079	2.273	1.68	1.73	1.62	1.18	0.0111299	0.00937591	0.013484	0.0848309	0.102306	0.143514	0.156496	0.349357	132.2	137.2	126.9	93.7	41.2	1.98	4.95	19.01	23.16	17.73	132.9	136.7	135
FALSE	High	IsMasterProtein	P22140	EPT1	D3DL73; P22140; sce:YHR123W	Choline/ethanolaminephosphotransferase 1 [OS=Saccharomyces cerevisiae S288C]	2.781	4	4	1	1	1	1	44.5	2.72	4	1	1	55	0
FALSE	High	IsMasterProtein	P41277	GPP1	D6VVM8; P38012; P41277; sce:YIL053W	Glycerol-1-phosphate phosphohydrolase 1 [OS=Saccharomyces cerevisiae S288C]	35.562	0	38	8	10	4	4	27.9	28.39	38	10	8	49	3	1.899	1.357	1.493	1.455	0.92	0.44	0.58	0.54	0.0549873	0.535606	0.297226	0.216469	0.275061	1	0.83704	0.64061	138.4	98.9	108.8	106	72.9	4.53	14.9	8.53	7.51	4.44	140.1	131.4	87.3
FALSE	Medium	IsMasterProtein	P38930	CKB2	D6W2A6; P38930; sce:YOR039W	Casein kinase II subunit beta' [OS=Saccharomyces cerevisiae S288C]	1.25	63	3	1	1	1	1	29.8	0	3	1	1	145	0
FALSE	High	None	Q12316	TY1B-GR3	D6VUU4; Q12316; sce:YGR161C-D	Transposon Ty1-GR3 Gag-Pol polyprotein [OS=Saccharomyces cerevisiae S288C]	78.075	0	12	16	21	0	2	198.4	65.31	12	21	16	97	0	0.823	0.794	0.464	3.415	-0.28	-0.33	-1.11	1.77	0.999906	0.999786	0.949347	0.999119	1	1	1	1	61	58.8	34.4	253.1	74.1	15.42	4.46	39.15	79.75	7.12	71.9	57.8	60.3
FALSE	Medium	IsMasterProtein	P24004	PEX1	D6VX03; P24004; sce:YKL197C	Peroxisomal ATPase PEX1 [OS=Saccharomyces cerevisiae S288C]	1.203	65	2	1	1	1	1	117.2	2.66	2	1	1	88	0
FALSE	High	None	P51402	RPL37B	D6VTC2; P51402; sce:YDR500C	60S ribosomal protein L37-B [OS=Saccharomyces cerevisiae S288C]	2.508	5	11	1	1	0	1	9.9	2.41	11	1	1	84	0	0.807	1.958	1.274	2.041	-0.31	0.97	0.35	1.03	0.976092	0.344678	0.960492	0.32397	1	1	1	0.795074	55.6	134.9	87.8	140.7	68.9	22.55	1.66	14.72	38.74	41.49	63.4	45.9	132.4
FALSE	High	IsMasterProtein	P43598	IGD1	D6VTP8; P43598; sce:YFR017C	Inhibitor of glycogen debranching 1 [OS=Saccharomyces cerevisiae S288C]	9.865	0	12	2	2	2	2	21.8	6.03	12	2	2	65	0	1.891	0.654	1.723	1.271	0.92	-0.61	0.79	0.35	0.0275922	0.156602	0.0579518	0.8197	0.181079	0.640928	0.324813	1	154.5	53.4	140.7	103.8	81.7	15.13	12.66	19.3	13.52	18.91	173.4	139.9	59
FALSE	High	IsMasterProtein	P32288	GLN1	D6W445; P32288; Q03959; sce:YPR035W	Glutamine synthetase [OS=Saccharomyces cerevisiae S288C]	12.87	0	8	4	4	3	4	41.7	10.56	8	4	4	65	0	0.843	0.666	2.278	1.405	-0.25	-0.59	1.19	0.49	0.818856	0.152616	0.00531072	0.194463	1	0.632501	0.1017	0.603887	70	55.3	189.1	116.6	83	1.83	4.56	20.18	18.09	16.79	69.4	67.6	55.9
FALSE	High	IsMasterProtein	P32905	RPS0A	D6VUZ7; P32905; sce:YGR214W	40S ribosomal protein S0-A [OS=Saccharomyces cerevisiae S288C]	26.984	0	32	5	6	0	5	28	20.66	32	6	5	109	0	0.58	1.427	0.844	0.742	-0.79	0.51	-0.24	-0.43	0.971458	0.995626	0.999874	0.766121	1	1	1	1	62	152.6	90.2	79.3	106.9	8.91	5.98	10.58	80.01	12.95	60.6	68.7	152.4
FALSE	Medium	None	P38163	SRO77	D6VPP7; P38163; sce:YBL106C	Lethal(2) giant larvae protein homolog SRO77 [OS=Saccharomyces cerevisiae S288C]	1.879	20	1	1	2	0	1	111.6	3.69	1	2	1	56	0	1.553	1.389	1.604	1.286	0.63	0.47	0.68	0.36	0.889105	0.962775	0.859173	0.612601	1	1	1	1	110.9	99.2	114.6	91.9	71.4	1.66	2.59	1.91	80.02	28.78	96.6	94.4	83.9
FALSE	High	IsMasterProtein	P40202	CCS1	D6VZL3; P40202; sce:YMR038C	Superoxide dismutase 1 copper chaperone [OS=Saccharomyces cerevisiae S288C]	19.137	0	41	8	8	8	8	27.3	19.81	41	8	8	89	0	0.749	0.548	0.803	1.052	-0.42	-0.87	-0.32	0.07	0.654622	0.101593	0.838813	0.964497	1	0.491219	1	1	84.4	61.7	90.5	118.5	112.6	0.05	2.83	3.97	28.87	10.11	86.3	86.3	61.9
FALSE	High	IsMasterProtein	P36041	EAP1	D6VWZ9; P36041; sce:YKL204W	Protein EAP1 [OS=Saccharomyces cerevisiae S288C]	138.358	0	40	24	45	24	24	69.7	145.73	40	45	24	125	0	2.975	0.875	2.578	5.536	1.57	-0.19	1.37	2.47	0.317817	0.999657	0.439939	0.137169	0.734752	1	1	0.481978	120.3	35.4	104.3	223.9	40.4	5.43	4.94	5.5	63.1	13.64	115.2	124.4	36.4
FALSE	High	IsMasterProtein	P07270	PHO4	D6VTR7; P07270; sce:YFR034C	Phosphate system positive regulatory protein PHO4 [OS=Saccharomyces cerevisiae S288C]	4.098	3	3	1	1	1	1	34.1	2.1	3	1	1	113	0	0.616	0.188	0.446	0.448	-0.7	-2.41	-1.16	-1.16	0.952654	0.156882	0.73889	0.350294	1	0.640928	1	0.829689	115.8	35.3	83.9	84.3	188.1	15.51	2.56	6.09	75.03	11.17	131.8	105.7	36.7
FALSE	High	IsMasterProtein	P02400	RPP2B	D6VT16; P02400; sce:YDR382W	60S acidic ribosomal protein P2-beta [OS=Saccharomyces cerevisiae S288C]	29.827	0	44	3	6	3	3	11	20.11	44	6	3	92	0	1.278	1.328	1.231	0.872	0.35	0.41	0.3	-0.2	0.893053	0.82879	0.942137	0.943352	1	1	1	1	113.9	118.3	109.7	77.7	89.1	3.44	0.59	8.73	26.64	45.5	118.3	112.7	119.4
FALSE	High	IsMasterProtein	P40580	IRC24	D6VVW7; P40580; Q54AB5; sce:YIR036C	Benzil reductase ((S)-benzoin forming) IRC24 [OS=Saccharomyces cerevisiae S288C]	4.841	1	3	1	1	1	1	28.8	2.68	3	1	1	9	0	9.194	9.735	9.842	6.623	3.2	3.28	3.3	2.73	0.347544	0.326232	0.322245	0.83395	0.770904	0.993408	0.873253	1	130.9	138.6	140.1	94.3	14.2	8.56	10.48	2.3	75.93	115.76	127.4	143.8	133
FALSE	High	None	P40957	MAD1	D6VU58; P40957; sce:YGL086W	Spindle assembly checkpoint component MAD1 [OS=Saccharomyces cerevisiae S288C]	2.129	7	1	1	1	0	1	87.6	2.42	1	1	1	149	0	2.496	2.306	3.542	2.193	1.32	1.21	1.82	1.13	0.0735848	0.103955	0.0178455	0.129727	0.325188	0.497869	0.179863	0.465802	118	109	167.4	103.7	47.3	17.54	7.06	23.73	45.34	11.08	142.4	111	122.1
FALSE	High	IsMasterProtein	P43123	QRI1	D6VRP7; P43123; sce:YDL103C	UDP-N-acetylglucosamine pyrophosphorylase [OS=Saccharomyces cerevisiae S288C]	4.074	3	6	3	3	3	3	53.4	2.24	6	3	3	39	0	2.394	5.013	3.545	2.8	1.26	2.33	1.83	1.49	0.819788	0.327357	0.541458	0.292024	1	0.994197	1	0.75913	87.4	183.1	129.5	102.3	36.5	3.36	16.63	18.57	123.23	16.21	58.6	61.5	111.7
FALSE	High	IsMasterProtein	P28241	IDH2	D6W2J3; P28241; sce:YOR136W	Isocitrate dehydrogenase [NAD] subunit 2, mitochondrial [OS=Saccharomyces cerevisiae S288C]	14.239	0	8	3	4	3	3	39.7	13.12	8	4	3	81	0	0.784	1.018	0.695	0.928	-0.35	0.03	-0.52	-0.11	0.97473	1	0.883446	0.995359	1	1	1	1	81.7	106.2	72.5	96.8	104.3	8.91	12.02	0.21	66.64	6.22	69.9	79.3	105.3
FALSE	High	None	Q99359	RAD61	D6VS00; Q99359; sce:YDR014W	Protein RAD61 [OS=Saccharomyces cerevisiae S288C]	2.122	7	1	1	1	0	1	74.7	2.38	1	1	1	78	0	100	100	100	100	6.64	6.64	6.64	6.64									207	229.6	148.1	8.1	0	11.86	18.65	53.02	136.29		231.1	195.4	269.2
FALSE	High	IsMasterProtein	P40563	AIM21	D6VVT3; P40563; sce:YIR003W	Altered inheritance of mitochondria protein 21 [OS=Saccharomyces cerevisiae S288C]	405.731	0	80	57	104	57	57	74.7	343.82	80	104	57	84	0	2.993	0.421	1.687	0.519	1.58	-1.25	0.75	-0.95	0.0258332	0.076894	0.391253	0.469428	0.172572	0.408677	1	1	246.9	34.7	139.2	42.8	82.5	11.69	3.48	11.89	47.11	14.89	270.4	229.1	35.9
FALSE	High	IsMasterProtein	P22202	SSA4	D3DM10; P22202; sce:YER103W	Heat shock protein SSA4 [OS=Saccharomyces cerevisiae S288C]	56.201	0	14	10	15	1	1	69.6	45.6	14	15	10	96	0	0.622	0.988	1.139	1.14	-0.69	-0.02	0.19	0.19	0.60484	1	0.996672	0.999855	1	1	1	1	60.7	96.4	111.2	111.2	97.6	20.42	0.41	5.73	41.9	23.21	53.4	71.4	98.4
FALSE	High	IsMasterProtein	P38066	RIB1	D6VPW6; P38066; sce:YBL033C	GTP cyclohydrolase-2 [OS=Saccharomyces cerevisiae S288C]	6.455	0	4	2	2	2	2	38.3	4.53	4	2	2	75	0	0.401	0.354	0.479	1.295	-1.32	-1.5	-1.06	0.37	0.639718	0.528215	0.795524	0.999965	1	1	1	1	60.2	53.2	71.9	194.2	150	0.35	22.94	40.46	65.19	38.9	57.6	57.9	60.1
FALSE	High	IsMasterProtein	P05755	RPS9B	D6VQI4; P05755; sce:YBR189W	40S ribosomal protein S9-B [OS=Saccharomyces cerevisiae S288C]	17.803	0	23	6	6	0	5	22.3	12.57	23	6	6	113	0	0.482	2.25	0.606	0.461	-1.05	1.17	-0.72	-1.12	0.476848	0.383292	0.781023	0.632801	0.914689	1	1	1	51.8	241.9	65.1	49.6	107.5	2.1	48.5	24.37	53.02	38.3	49.2	50.7	333.6
FALSE	High	None	Q12472	TY2B-DR1	D6VS19; Q04345; Q07166; Q12472; Q7LIH4; sce:YDR034C-D	Transposon Ty2-DR1 Gag-Pol polyprotein [OS=Saccharomyces cerevisiae S288C]	17.136	0	4	5	6	0	5	201.8	16.45	4	6	5	97	0	2.392	1.145	2.81	3.232	1.26	0.2	1.49	1.69	0.0956673	0.994179	0.0460419	0.0123355	0.355734	1	0.276497	0.107375	123.9	59.3	145.6	167.4	51.8	10.35	8.48	17.49	46.9	2.08	120.5	104.1	50.5
FALSE	High	IsMasterProteinCandidate	O13516	RPS9A	D6W3T6; O13516; sce:YPL081W	40S ribosomal protein S9-A [OS=Saccharomyces cerevisiae S288C]	17.803	0	22	6	6	0	5	22.4	12.57	22	6	6	115	0	0.482	2.25	0.606	0.461	-1.05	1.17	-0.72	-1.12	0.476848	0.383292	0.781023	0.632801	0.914689	1	1	1	51.8	241.9	65.1	49.6	107.5	2.1	48.5	24.37	53.02	38.3	49.2	50.7	333.6
FALSE	Medium	IsMasterProtein	P00937	TRP3	D6VWZ2; P00937; sce:YKL211C	Multifunctional tryptophan biosynthesis protein [OS=Saccharomyces cerevisiae S288C]	1.51	44	1	1	1	1	1	53.5	0	1	1	1	63	0
FALSE	High	IsMasterProtein	P21538	REB1	D6VQ49; P21538; sce:YBR049C	DNA-binding protein REB1 [OS=Saccharomyces cerevisiae S288C]	52.828	0	19	13	15	13	13	91.8	40.02	19	15	13	108	0	0.298	0.182	0.364	0.198	-1.75	-2.46	-1.46	-2.33	0.0761657	0.0147516	0.153301	0.00587893	0.332755	0.174625	0.548731	0.0813843	76.6	46.7	93.6	51	257.1	18.48	7.57	2.17	51.25	20.68	91.4	70.3	46.3
FALSE	High	IsMasterProtein	P40160	RIO2	D6W0Y3; P40160; sce:YNL207W	Serine/threonine-protein kinase RIO2 [OS=Saccharomyces cerevisiae S288C]	77.115	0	34	16	19	16	16	49.1	60.19	34	19	16	97	0	2.877	1.028	1.976	1.239	1.52	0.04	0.98	0.31	0.50494	1	0.834062	0.971759	0.951109	1	1	1	189.1	67.6	129.9	81.5	65.7	14.42	16.52	16.71	67.13	12.44	181.7	223	64
FALSE	High	IsMasterProtein	Q04500	UTP14	D6W0J2; Q04500; sce:YML093W	U3 small nucleolar RNA-associated protein 14 [OS=Saccharomyces cerevisiae S288C]	10.007	0	4	2	2	2	2	103	7.88	4	2	2	81	0	0.327	0.351	0.324	0.415	-1.61	-1.51	-1.63	-1.27	0.083079	0.108317	0.0806377	0.344177	0.346554	0.508747	0.375385	0.824496	66.2	71.1	65.7	84.3	202.8	18.39	2.75	7.21	64.18	0.64	54.4	70.6	65.3
FALSE	High	IsMasterProtein	P35691	TMA19	D6VXN1; P35691; sce:YKL056C	Translationally-controlled tumor protein homolog [OS=Saccharomyces cerevisiae S288C]	2.097	8	4	1	1	1	1	18.7	2.06	4	1	1	94	0	2.344	6.813	4.045	3.53	1.23	2.77	2.02	1.82	0.897389	0.305487	0.584242	0.236227	1	0.955583	1	0.675776	72.8	211.5	125.6	109.6	31	3.14	21.73	27.17	135.86	27.21	42	40.1	139.3
FALSE	Medium	IsMasterProtein	Q08964		D6W3F4; Q08964; sce:YPL216W	Putative ISWI chromatin-remodeling complex subunit YPL216W [OS=Saccharomyces cerevisiae S288C]	1.911	17	1	1	1	1	1	128.1	0	1	1	1	16	0
FALSE	High	IsMasterProtein	P19880	YAP1	D6VZG8; P19880; P22631; Q06840; sce:YML007W	AP-1-like transcription factor YAP1 [OS=Saccharomyces cerevisiae S288C]	55.12	0	17	8	11	8	8	72.5	33.18	17	11	8	124	0	1.061	0.438	0.987	0.498	0.09	-1.19	-0.02	-1.01	0.999478	0.0295046	1	0.032591	1	0.237615	1	0.184079	137.4	56.7	127.7	64.5	129.5	5.67	5.08	12.48	31.44	1.56	135.5	146.9	60.3
FALSE	High	IsMasterProtein	P40959	MVP1	D6VZH9; P40959; sce:YMR004W	Sorting nexin MVP1 [OS=Saccharomyces cerevisiae S288C]	4.728	1	3	1	1	1	1	59.6	4.15	3	1	1	60	0	0.652	0.767	0.837	0.615	-0.62	-0.38	-0.26	-0.7	0.787205	0.959951	0.992757	0.983405	1	1	1	1	79.8	93.9	102.5	75.2	122.4	27.24	18.89	1.79	59.19	18.2	61.2	90.4	100.1
FALSE	High	IsMasterProtein	P38009	ADE17	D6VZU3; P38009; sce:YMR120C	Bifunctional purine biosynthesis protein ADE17 [OS=Saccharomyces cerevisiae S288C]	34.483	0	15	5	6	3	5	65.2	22.25	15	6	5	73	0	0.776	0.65	0.839	0.588	-0.37	-0.62	-0.25	-0.77	0.913896	0.599409	0.980155	0.168232	1	1	1	0.552282	92.7	77.8	100.4	70.3	119.6	5.96	9.55	9.93	40.84	14.19	91.8	99.9	85.9
FALSE	High	IsMasterProtein	Q12494	KCS1	D6VS03; P89899; Q12494; Q7LGR2; sce:YDR017C	Inositol hexakisphosphate kinase 1 [OS=Saccharomyces cerevisiae S288C]	112.278	0	26	29	36	29	29	119.5	79.82	26	36	29	89	0	3.103	0.695	2.095	1.088	1.63	-0.52	1.07	0.12	0.00124719	0.275701	0.0146695	0.999953	0.0349086	0.899162	0.16178	1	212.9	47.7	143.7	74.6	68.6	10.79	2.75	1.83	22.24	0.52	235.6	202.2	48
FALSE	High	IsMasterProtein	P28495	CAP1	D6VXS9; P28495; sce:YKL007W	F-actin-capping protein subunit alpha [OS=Saccharomyces cerevisiae S288C]	6.09	0	7	1	1	1	1	30.7	4.57	7	1	1	75	0	0.642	0.616	0.777	0.423	-0.64	-0.7	-0.36	-1.24	0.580461	0.498194	0.917911	0.101995	1	1	1	0.39791	89.5	85.7	108.2	59	139.3	10.28	31.6	1.05	20.09	17.86	83.1	96.2	107.5
FALSE	High	IsMasterProtein	P32328	DBF20	D6W4B0; E9P8X8; P32328; Q06105; sce:YPR111W	Serine/threonine-protein kinase DBF20 [OS=Saccharomyces cerevisiae S288C]	41.515	0	24	15	16	7	7	65.8	35.88	24	16	15	110	0	2.585	0.889	2.303	1.979	1.37	-0.17	1.2	0.98	0.0478766	0.995632	0.0842523	0.0703787	0.257057	1	0.381125	0.31465	153.7	52.8	136.9	117.7	59.5	6.78	19.98	1.92	45.3	3.76	151	137.2	42.9
FALSE	High	IsMasterProtein	P46949	FYV8	D6VUX8; P46949; sce:YGR196C	Protein FYV8 [OS=Saccharomyces cerevisiae S288C]	30.908	0	8	6	7	6	6	90.7	19.86	8	7	6	8	0	1.726	0.643	1.579	1.003	0.79	-0.64	0.66	0	0.966342	0.986145	0.984033	0.85386	1	1	1	1	148.8	55.4	136.1	86.4	86.2	2.59	0.27	12.06	74.4	19.51	162	156.2	59.3
FALSE	High	None	P09435	SSA3	D6VPS7; P09435; P18862; sce:YBL075C	Heat shock protein SSA3 [OS=Saccharomyces cerevisiae S288C]	49.488	0	12	9	14	0	0	70.5	42.75	12	14	9	111	0	1.873	1.856	2.243	1.986	0.91	0.89	1.17	0.99	0.232467	0.242937	0.0956891	0.0734111	0.609828	0.840034	0.405708	0.324421	104.4	103.5	125	110.7	55.7	7.09	8.16	1.72	31.78	38.24	94.5	104.5	92.9
FALSE	High	IsMasterProtein	P36008	TEF4	D6VXK6; P36008; sce:YKL081W	Elongation factor 1-gamma 2 [OS=Saccharomyces cerevisiae S288C]	57.6	0	26	12	16	9	9	46.5	47.62	26	16	12	83	3	1.102	1.419	0.89	1.023	0.14	0.51	-0.17	0.03	0.991322	0.425563	0.980519	0.97575	1	1	1	1	100.7	129.7	81.3	93.5	91.4	2.54	14.57	2.96	22.88	6.5	96.6	100.1	140.5
FALSE	High	IsMasterProtein	P47047	MTR4	D6VWD3; P47047; sce:YJL050W	ATP-dependent RNA helicase DOB1 [OS=Saccharomyces cerevisiae S288C]	4.958	1	2	2	2	2	2	122	3.51	2	2	2	195	0	1.416	3.471	1.87	1.281	0.5	1.8	0.9	0.36	0.907014	0.0672046	0.527338	0.808296	1	0.372859	1	1	81	198.5	107	73.3	57.2	16.75	22.2	22.73	28.36	51.1	69.5	88.2	163.8
FALSE	Medium	IsMasterProtein	Q06344	ESF1	D6VSZ4; Q06344; sce:YDR365C	Pre-rRNA-processing protein ESF1 [OS=Saccharomyces cerevisiae S288C]	1.242	63	2	1	1	1	1	72.4	1.91	2	1	1	53	0	0.705	0.584	0.734	0.666	-0.5	-0.78	-0.45	-0.59	0.997577	0.982962	0.998629	0.996537	1	1	1	1	92.6	76.7	96.4	87.4	131.3	1.54	2.04	16.61	140.26	21.38	53.8	52.6	43.4
FALSE	High	IsMasterProteinCandidate	O13535	TY1B-H	D3DLG6; O13535; sce:YHR214C-B	Transposon Ty1-H Gag-Pol polyprotein [OS=Saccharomyces cerevisiae S288C]	83.944	0	13	17	22	0	2	202.7	69.84	13	22	17	97	0	0.823	0.794	0.464	3.415	-0.28	-0.33	-1.11	1.77	0.999906	0.999786	0.949347	0.999119	1	1	1	1	61	58.8	34.4	253.1	74.1	15.42	4.46	39.15	79.75	7.12	71.9	57.8	60.3
FALSE	High	IsMasterProtein	Q03640	TCB3	D6VZA1; Q03640; sce:YML072C	Tricalbin-3 [OS=Saccharomyces cerevisiae S288C]	22.26	0	5	3	4	3	3	171	15.65	5	4	3	66	0	0.179	0.48	0.209	0.206	-2.48	-1.06	-2.26	-2.28	0.00408889	0.171336	0.00666772	0.00637566	0.0610148	0.67361	0.115044	0.0842027	41.6	111.8	48.6	47.9	232.8	14.28	8.14	37.79	43.65	7.54	40.4	49.4	127.1
FALSE	High	IsMasterProtein	P18899	DDR48	D6VZZ5; P18899; sce:YMR173W	Stress protein DDR48 [OS=Saccharomyces cerevisiae S288C]	27.698	0	20	7	9	7	7	46.2	20.93	20	9	7	32	0	2.111	0.707	2.863	1.648	1.08	-0.5	1.52	0.72	0.00893113	0.250709	0.00119051	0.0743723	0.0947312	0.854046	0.0455965	0.326159	137.2	46	186.1	107.1	65	8.38	12.6	8.75	20.07	4.92	129.7	146	42.2
FALSE	High	IsMasterProtein	P33748	MSN2	D6VZL2; P33748; sce:YMR037C	Zinc finger protein MSN2 [OS=Saccharomyces cerevisiae S288C]	17.322	0	5	3	5	3	3	77.8	12.28	5	5	3	187	0	1.577	0.302	1.239	2.074	0.66	-1.73	0.31	1.05	0.286155	0.00568445	0.854579	0.0581079	0.691295	0.12455	1	0.273631	138.1	26.4	108.5	181.6	87.6	16.48	28.24	12.49	5.35	29.07	167.1	132.2	23.2
FALSE	High	IsMasterProtein	P32790	SLA1	D6VPZ3; P32790; sce:YBL007C	Actin cytoskeleton-regulatory complex protein SLA1 [OS=Saccharomyces cerevisiae S288C]	114.352	0	21	23	30	22	23	135.8	93.56	21	30	23	94	0	1.089	0.767	1.49	1.521	0.12	-0.38	0.58	0.61	0.840619	0.0610352	0.00788016	0.00201803	1	0.360252	0.116542	0.0407016	97.4	68.5	133.2	136	89.4	3.67	4.42	4.92	9.57	11.95	95.9	91	67.8
FALSE	High	IsMasterProtein	Q05946	UTP13	D6VYM2; Q05946; sce:YLR222C	U3 small nucleolar RNA-associated protein 13 [OS=Saccharomyces cerevisiae S288C]	7.373	0	5	2	3	2	2	91	10.8	5	3	2	76	0	0.576	0.718	0.652	0.707	-0.8	-0.48	-0.62	-0.5	0.230067	0.662524	0.437233	0.631484	0.605028	1	1	1	74.8	93.3	84.6	91.9	129.9	18.37	11.55	22.39	33.49	5.53	64.8	84.2	99.9
FALSE	High	IsMasterProtein	Q06408	ARO10	D6VT13; Q06408; sce:YDR380W	Transaminated amino acid decarboxylase [OS=Saccharomyces cerevisiae S288C]	10.438	0	5	2	2	2	2	71.3	7.89	5	2	2	98	0	0.8	0.795	0.765	0.576	-0.32	-0.33	-0.39	-0.8	0.745093	0.726472	0.603626	0.0957131	1	1	1	0.385875	99.5	98.9	95.1	71.6	124.4	12.32	2.64	5.11	4.87	16.57	98.1	116.8	108.4
FALSE	High	IsMasterProteinCandidate	Q04670	TY1B-MR2	D6VZM5; Q04670; sce:YMR050C	Transposon Ty1-MR2 Gag-Pol polyprotein [OS=Saccharomyces cerevisiae S288C]	83.944	0	13	17	22	0	2	198.4	69.84	13	22	17	97	0	0.823	0.794	0.464	3.415	-0.28	-0.33	-1.11	1.77	0.999906	0.999786	0.949347	0.999119	1	1	1	1	61	58.8	34.4	253.1	74.1	15.42	4.46	39.15	79.75	7.12	71.9	57.8	60.3
FALSE	High	IsMasterProtein	P38306		D6VQJ3; P38306; sce:YBR197C	Uncharacterized protein YBR197C [OS=Saccharomyces cerevisiae S288C]	5.873	0	8	2	2	2	2	24.2	3.29	8	2	2	1	0	0.689	0.707	0.812	0.613	-0.54	-0.5	-0.3	-0.71	0.94213	0.955816	0.995073	0.517116	1	1	1	1	91.5	93.8	107.7	81.4	132.7	11.11	25.14	3.47	59.68	24.31	86	100.7	79.7
FALSE	Medium	IsMasterProtein	P38912	TIF11	D6W086; P38912; sce:YMR260C	Eukaryotic translation initiation factor 1A [OS=Saccharomyces cerevisiae S288C]	1.596	36	5	1	1	1	1	17.4	2.12	5	1	1	87	0
FALSE	High	IsMasterProtein	P32264	PRO1	D6VSS9; P32264; sce:YDR300C	Glutamate 5-kinase [OS=Saccharomyces cerevisiae S288C]	7.175	0	12	3	3	3	3	47.1	8.16	12	3	3	75	0	0.21	0.335	0.192	0.137	-2.25	-1.58	-2.38	-2.86	0.00328092	0.0233974	0.00238134	0.000700922	0.0552424	0.214892	0.0636316	0.0191752	54.3	86.8	49.8	35.6	259.2	12.99	15.69	15.53	31.91	0.7	61	50.7	99.3
FALSE	High	None	P19146	ARF2	A2TBP3; D6VRL1; P19146; sce:YDL137W	ADP-ribosylation factor 2 [OS=Saccharomyces cerevisiae S288C]	11.232	0	19	3	3	0	3	20.6	9.33	19	3	3	62	0	0.934	0.977	0.829	1.3	-0.1	-0.03	-0.27	0.38	0.999545	0.999998	0.957281	0.989628	1	1	1	1	83.7	87.6	74.3	116.5	89.6	14.89	28.33	2.1	28.21	27.73	75.9	93.8	108.3
FALSE	High	IsMasterProtein	Q06839		D6W496; Q06839; sce:YPR097W	PX domain-containing protein YPR097W [OS=Saccharomyces cerevisiae S288C]	10.862	0	4	3	3	3	3	123	8.4	4	3	3	23	0	1.748	1.155	1.374	1.15	0.81	0.21	0.46	0.2	0.708341	0.998628	0.954835	0.760471	1	1	1	1	133.8	88.4	105.1	88	76.5	8.87	1.02	0.6	71.17	42.6	111.7	126.7	79.2
FALSE	Medium	IsMasterProtein	P32464	HYM1	D6VX11; P32464; sce:YKL189W	Protein HYM1 [OS=Saccharomyces cerevisiae S288C]	1.647	33	2	1	1	1	1	45.8	2.08	2	1	1	99	0	1.569	1.118	1.373	1.048	0.65	0.16	0.46	0.07	0.25497	0.984936	0.545658	0.999743	0.63687	1	1	1	135.3	96.4	118.3	90.3	86.2	18.7	33.7	2.79	5.56	17.61	166	127.2	132.1
FALSE	Low	IsMasterProtein	P25635	PWP2	D6VR63; P25633; P25635; P25636; sce:YCR057C	Periodic tryptophan protein 2 [OS=Saccharomyces cerevisiae S288C]	0.997	78	1	1	1	1	1	103.9	0	1	1	1	84	0	1.195	1.78	1.638	2.058	0.26	0.83	0.71	1.04	0.999936	0.983695	0.991799	0.444195	1	1	1	0.970304	76.2	113.5	104.4	131.2	63.7	17.47	14.43	9.04	147.06	27.61	33.2	25.9	48.4
FALSE	High	IsMasterProtein	P39101	CAJ1	D3DLU9; P39101; sce:YER048C	Protein CAJ1 [OS=Saccharomyces cerevisiae S288C]	57.959	0	29	13	16	13	13	44.8	45.42	29	16	13	44	0	4.582	1.51	2.48	1.046	2.2	0.59	1.31	0.06	0.10709	0.945776	0.475944	0.994349	0.38095	1	1	1	235.7	77.7	127.6	53.8	51.4	14.7	16.06	2.78	66.1	5.27	271.9	220.7	72.1
FALSE	High	IsMasterProtein	P21734	UBC1	D6VSF9; P21734; sce:YDR177W	Ubiquitin-conjugating enzyme E2 1 [OS=Saccharomyces cerevisiae S288C]	3.299	3	3	1	1	1	1	24.2	2.3	3	1	1	82	0
FALSE	High	IsMasterProtein	P32831	NGR1	D6VQK8; P32831; sce:YBR212W	Negative growth regulatory protein NGR1 [OS=Saccharomyces cerevisiae S288C]	100.641	0	31	18	28	17	18	75	83.13	31	28	18	87	0	1.766	1.241	2.575	4.069	0.82	0.31	1.36	2.02	0.6099	0.985969	0.189053	0.0507621	1	1	0.619692	0.248194	88.7	62.4	129.4	204.5	50.2	23.58	4.59	23.57	48.83	24.98	100.6	71.9	61.7
FALSE	High	IsMasterProtein	Q08601	MCA1	D6W2Q6; Q08601; sce:YOR197W	Metacaspase-1 [OS=Saccharomyces cerevisiae S288C]	44.228	0	23	7	9	7	7	48	32.31	23	9	7	40	0	2.273	1.119	2.183	2.851	1.18	0.16	1.13	1.51	0.0132454	0.978931	0.017301	0.00251936	0.111842	1	0.17749	0.0467073	126.1	62.1	121.1	158.1	55.5	6.13	13.88	2.5	23.03	23	116.4	126.9	66
FALSE	Medium	IsMasterProtein	Q02642	EGD1	D6W3X7; Q02107; Q02642; sce:YPL037C	Nascent polypeptide-associated complex subunit beta-1 [OS=Saccharomyces cerevisiae S288C]	1.192	66	4	1	1	1	1	17	0	4	1	1	60	0
FALSE	High	IsMasterProtein	P39938	RPS26A	A2TBN5; D6VTW5; P39938; sce:YGL189C	40S ribosomal protein S26-A [OS=Saccharomyces cerevisiae S288C]	18.51	0	27	3	4	1	1	13.5	12.33	27	4	3	83	2	0.778	0.927	0.767	0.727	-0.36	-0.11	-0.38	-0.46	0.709842	0.996925	0.666852	0.51442	1	1	1	1	91.1	108.5	89.8	85.1	117.1	18.3	1.34	11.15	24.62	13.13	111.6	86	117.8
FALSE	Medium	IsMasterProtein	P41800	MMM1	D6VXZ7; P41800; sce:YLL006W	Maintenance of mitochondrial morphology protein 1 [OS=Saccharomyces cerevisiae S288C]	1.179	66	1	1	1	1	1	48.6	0	1	1	1	102	0	0.376	1.459	0.599	0.52	-1.41	0.54	-0.74	-0.94	0.160133	0.86943	0.682674	0.330387	0.480398	1	1	0.805124	46	178.5	73.3	63.7	122.4	2.51	17.13	49.69	37.2	39.58	45.5	47.2	159.3
FALSE	High	IsMasterProteinCandidate	P0C0W9	RPL11A	D6W4A0; P06380; P0C0W9; sce:YPR102C	60S ribosomal protein L11-A [OS=Saccharomyces cerevisiae S288C]	14.918	0	20	4	5	0	4	19.7	15.22	20	5	4	72	0	0.532	1.523	0.749	0.62	-0.91	0.61	-0.42	-0.69	0.439518	0.772544	0.934319	0.525939	0.892236	1	1	1	61.1	174.9	86	71.2	114.8	13.19	25.29	9.87	44.07	23.16	56	67.5	210.7
FALSE	High	IsMasterProteinCandidate	P49626	RPL4B	D6VRZ8; P49626; sce:YDR012W	60S ribosomal protein L4-B [OS=Saccharomyces cerevisiae S288C]	65.132	0	31	9	25	0	9	39	97.76	31	25	9	55	0	0.521	1.069	0.69	0.866	-0.94	0.1	-0.53	-0.21	0.245787	0.999776	0.721373	0.963881	0.62531	1	1	1	60.6	124.3	80.3	100.7	116.3	15.8	7.38	23.71	40.29	17.85	53.7	67.2	129.9
FALSE	High	IsMasterProtein	P39008	POP2	D6W1M7; P39008; sce:YNR052C	Poly(A) ribonuclease POP2 [OS=Saccharomyces cerevisiae S288C]	68.339	0	33	11	16	11	11	49.7	54.65	33	16	11	165	0	2.129	2.488	3.959	9.078	1.09	1.32	1.99	3.18	0.30387	0.172583	0.0310631	0.00165456	0.716558	0.675239	0.251349	0.0345653	61.5	71.9	114.4	262.2	28.9	3.81	1.16	10.86	50.99	18.06	52.5	55.4	63.6
FALSE	High	IsMasterProtein	Q03940	RVB1	D6VSH3; Q03940; sce:YDR190C	RuvB-like protein 1 [OS=Saccharomyces cerevisiae S288C]	117.295	0	49	18	27	18	18	50.4	87.18	49	27	18	146	0	1.812	0.854	1.039	1.065	0.86	-0.23	0.06	0.09	0.47564	0.994482	0.999994	0.999682	0.914689	1	1	1	165.2	77.9	94.7	97.1	91.2	4.62	17.42	1.77	48.98	16.28	172.5	161.6	69.5
FALSE	High	IsMasterProtein	Q03973	HMO1	D6VSF6; Q03973; sce:YDR174W	High mobility group protein 1 [OS=Saccharomyces cerevisiae S288C]	2.04	10	5	1	1	1	1	27.5	0	5	1	1	131	0
FALSE	High	IsMasterProtein	P38260	FES1	D6VQA0; P38260; sce:YBR101C	Hsp70 nucleotide exchange factor FES1 [OS=Saccharomyces cerevisiae S288C]	48.125	0	47	10	12	10	10	32.6	38.58	47	12	10	75	0	1.182	0.665	1.353	0.911	0.24	-0.59	0.44	-0.13	0.98697	0.688467	0.869015	0.993174	1	1	1	1	116.2	65.4	133	89.5	98.2	12.99	1.95	3.23	53.93	6.14	99.1	119.1	62
FALSE	High	IsMasterProtein	P53858	BNI4	D6W0V9; P53858; sce:YNL233W	Protein BNI4 [OS=Saccharomyces cerevisiae S288C]	197.303	0	46	28	45	28	28	100.5	176.12	46	45	28	76	0	1.294	0.405	1.107	0.617	0.37	-1.3	0.15	-0.7	0.452411	0.00217479	0.966157	0.128809	0.90392	0.0805374	1	0.465802	156.5	49	133.8	74.7	120.9	2.05	5.68	12.34	22.96	1.02	157.9	153.4	50.7
FALSE	High	IsMasterProtein	Q06696	VPS36	D6VZ53; Q06696; sce:YLR417W	Vacuolar protein-sorting-associated protein 36 [OS=Saccharomyces cerevisiae S288C]	5.713	0	4	1	1	1	1	64	3.23	4	1	1	171	0	0.578	0.832	0.628	0.59	-0.79	-0.27	-0.67	-0.76	0.0320949	0.68923	0.0649144	0.0384216	0.197204	1	0.34214	0.206291	72.8	104.9	79.2	74.4	126.1	12.19	5.65	3.7	17.93	6.75	72.1	85.7	117.8
FALSE	Medium	None	P24384	PRP22	D3DLR0; P24384; sce:YER013W	Pre-mRNA-splicing factor ATP-dependent RNA helicase PRP22 [OS=Saccharomyces cerevisiae S288C]	1.845	20	1	1	1	0	1	129.9	2.04	1	1	1	92	0	1.026	0.419	1.273	2.97	0.04	-1.26	0.35	1.57	0.999998	0.120352	0.938024	0.0503958	1	0.543952	1	0.247456	77.2	31.5	95.9	223.6	75.3	31.86	34.95	24.8	2.19	33.17	103.9	65.7	43.4
FALSE	High	IsMasterProtein	P32558	SPT16	D6VTU8; P32558; sce:YGL207W	FACT complex subunit SPT16 [OS=Saccharomyces cerevisiae S288C]	27.142	0	10	6	7	5	5	118.6	24.82	10	7	6	138	0	0.496	0.485	0.535	0.471	-1.01	-1.05	-0.9	-1.08	0.578481	0.549355	0.67492	0.191726	1	1	1	0.600053	76.9	75.1	83	73.1	155	8.35	17.83	6.04	56.78	11.12	74.9	84.3	88.1
FALSE	High	IsMasterProtein	Q03761	TAF12	D6VSC8; Q03761; sce:YDR145W	Transcription initiation factor TFIID subunit 12 [OS=Saccharomyces cerevisiae S288C]	5.838	0	3	2	2	2	2	61	0	3	2	2	144	0	1.685	2.235	1.743	0.442	0.75	1.16	0.8	-1.18	0.771485	0.424314	0.729548	0.412444	1	1	1	0.914378	131	173.8	135.5	34.4	77.7	3.18	15.93	12.96	50.92	14.93	136	142.3	164.9
FALSE	High	IsMasterProtein	P32074	SEC21	D6W0Q6; P32074; sce:YNL287W	Coatomer subunit gamma [OS=Saccharomyces cerevisiae S288C]	124.122	0	33	20	26	20	20	104.8	94.02	33	26	20	66	0	1.824	1.169	2.574	1.07	0.87	0.23	1.36	0.1	0.570221	0.996887	0.195558	1	1	1	0.62918	1	127.5	81.7	179.9	74.8	69.9	10.94	0.89	16.91	57	7.75	139.2	119.2	83.1
FALSE	Medium	None	P40073	SHO1	D3DM24; P40073; sce:YER118C	High osmolarity signaling protein SHO1 [OS=Saccharomyces cerevisiae S288C]	1.543	43	2	1	1	0	1	41.1	2.23	2	1	1	80	0	5.359	5.494	4.03	43.45	2.42	2.46	2.01	5.44	0.0511632	0.0478414	0.111796	0.000256718	0.268671	0.312056	0.443993	0.0167465	50.2	51.4	37.7	406.7	9.4	40.75	14.37	5.03	40.54	74.95	48	26.5	40.5
FALSE	High	None	Q04215	TY1A-MR1	D6VZM1; Q04215; sce:YMR046C	Transposon Ty1-MR1 Gag polyprotein [OS=Saccharomyces cerevisiae S288C]	17.352	0	6	3	5	0	1	49.2	9.86	6	5	3	21	0	1.493	1.283	1.428	4.998	0.58	0.36	0.51	2.32	0.580332	0.888847	0.678415	0.00129442	1	1	1	0.0291626	74.8	64.3	71.6	250.4	50.1	6.75	5.15	8.01	26.43	41.34	69.1	62.8	58.7
FALSE	High	IsMasterProtein	P33298	RPT3	D6VT28; P33298; sce:YDR394W	26S proteasome regulatory subunit 6B homolog [OS=Saccharomyces cerevisiae S288C]	38.722	0	22	7	9	6	6	47.9	28.87	22	9	7	138	1	1.915	1.22	1.632	0.971	0.94	0.29	0.71	-0.04	0.622541	0.995031	0.822163	0.806239	1	1	1	1	142.6	90.8	121.5	72.3	74.5	0.94	0.43	4.13	55.4	13.94	152.8	150.8	96.4
FALSE	High	IsMasterProtein	P38266	AIM3	D6VQA7; P38266; sce:YBR108W	Altered inheritance of mitochondria protein 3 [OS=Saccharomyces cerevisiae S288C]	27.019	0	10	8	8	8	8	103.8	22.66	10	8	8	70	0	1.988	1.638	2.685	2.214	0.99	0.71	1.42	1.15	0.110406	0.320681	0.0214985	0.0279824	0.385584	0.992296	0.197615	0.167457	110.8	91.3	149.6	123.4	55.7	2.2	16.5	16.37	21.9	39.58	107.5	104.2	77.5
FALSE	High	IsMasterProtein	P48589	RPS12	D6W362; P48589; Q02545; sce:YOR369C	40S ribosomal protein S12 [OS=Saccharomyces cerevisiae S288C]	15.245	0	20	2	12	2	2	15.5	37.59	20	12	2	46	0	0.424	1.15	0.595	0.922	-1.24	0.2	-0.75	-0.12	0.607107	0.999727	0.909075	0.997498	1	1	1	1	51.2	138.8	71.9	111.3	120.7	4.75	36.57	27.69	93.02	14.34	43.5	40.6	148.5
FALSE	High	IsMasterProtein	P11792	SCH9	D3DLF4; P11792; sce:YHR205W	Serine/threonine-protein kinase SCH9 [OS=Saccharomyces cerevisiae S288C]	18.067	0	8	5	5	5	5	91.8	17.46	8	5	5	143	0	3.184	1.676	3.276	1.884	1.67	0.75	1.71	0.91	0.00866993	0.232577	0.00766724	0.120851	0.0931005	0.816509	0.116542	0.442224	160.6	84.6	165.3	95	50.4	5.48	9.19	0.61	19.45	0.85	166.5	179.9	97.2
FALSE	High	IsMasterProtein	P53829	CAF40	D6W0Q5; P53829; sce:YNL288W	Protein CAF40 [OS=Saccharomyces cerevisiae S288C]	29.442	0	19	7	9	7	7	41.1	20.86	19	9	7	121	0	1.089	1.155	1.462	3.426	0.12	0.21	0.55	1.78	0.999977	0.999688	0.973419	0.490057	1	1	1	1	71.5	75.9	96	225	65.7	6.46	5.34	11.76	70.36	5.16	64.5	70.7	69
FALSE	High	None	P35843	HES1	D6W2U0; P35843; sce:YOR237W	Oxysterol-binding protein homolog 5 [OS=Saccharomyces cerevisiae S288C]	2.458	5	1	1	1	0	1	49.5	1.93	1	1	1	69	0	0.404	0.123	0.236	0.216	-1.31	-3.02	-2.08	-2.21	0.373751	0.018693	0.0920731	0.0726958	0.817981	0.194929	0.396225	0.3225	80	24.4	46.8	42.8	198.4	58.7	3.59	24.61	13.78	22.55	126.3	52.2	25.4
FALSE	High	IsMasterProtein	P37296	STV1	D6VZM9; P37296; sce:YMR054W	V-type proton ATPase subunit a, Golgi isoform [OS=Saccharomyces cerevisiae S288C]	5.029	1	2	1	1	1	1	101.6	3.86	2	1	1	106	0	0.448	0.636	0.635	0.499	-1.16	-0.65	-0.66	-1	0.941844	0.994903	0.994778	0.481802	1	1	1	1	62.8	89.1	88.9	69.9	140	7.08	6.63	8.04	81.42	21.02	63.3	70	99
FALSE	High	IsMasterProtein	P40413	CCT5	D6VWN5; P40413; sce:YJR064W	T-complex protein 1 subunit epsilon [OS=Saccharomyces cerevisiae S288C]	11.33	0	5	1	2	1	1	61.9	7.06	5	2	1	46	0	0.246	0.615	0.236	0.359	-2.02	-0.7	-2.08	-1.48	0.117668	0.862431	0.105782	0.305182	0.394197	1	0.431007	0.76993	41.1	102.8	39.5	59.9	167	30.28	2.59	19.62	61.7	37.6	33.9	52.3	107.1
FALSE	High	None	Q03494	TY2B-DR2	D6VSJ1; Q03494; sce:YDR210W-B	Transposon Ty2-DR2 Gag-Pol polyprotein [OS=Saccharomyces cerevisiae S288C]	17.136	0	4	5	6	0	5	202	16.45	4	6	5	97	0	2.392	1.145	2.81	3.232	1.26	0.2	1.49	1.69	0.0956673	0.994179	0.0460419	0.0123355	0.355734	1	0.276497	0.107375	123.9	59.3	145.6	167.4	51.8	10.35	8.48	17.49	46.9	2.08	120.5	104.1	50.5
FALSE	High	None	P39567	IMD1	P39567	Putative inosine-5'-monophosphate dehydrogenase 1 [OS=Saccharomyces cerevisiae S288C]	56.576	0	21	7	12	0	3	44.4	46.14	21	12	7	70	0	0.361	0.743	0.782	0.561	-1.47	-0.43	-0.35	-0.83	0.611058	0.9958	0.998271	0.480256	1	1	1	1	44.3	91.4	96.2	68.9	123	50.04	23.79	9.52	69.58	33.25	31.9	66.9	80.3
FALSE	High	None	P51533	PDR10	D6W325; P51533; sce:YOR328W	ATP-dependent permease PDR10 [OS=Saccharomyces cerevisiae S288C]	8.315	0	2	3	4	0	3	176.3	8.66	2	4	3	75	0	2.409	2.333	2.235	2.713	1.27	1.22	1.16	1.44	0.0789112	0.0919927	0.112834	0.0296383	0.338317	0.457176	0.443993	0.171992	118.2	114.5	109.7	133.1	49.1	24.47	9.67	0.12	32.05	2.08	134.9	95.1	117.4
FALSE	Medium	IsMasterProtein	Q07509		Q07509	Putative uncharacterized protein YDL094C [OS=Saccharomyces cerevisiae S288C]	1.367	52	4	1	1	1	1	19.7	2.21	4	1	1	5	0	0.613	0.351	0.174	0.195	-0.71	-1.51	-2.53	-2.36	0.995321	0.892485	0.556122	0.945775	1	1	1	1	123.2	70.5	34.9	39.2	201	3.65	10.43	12.98	153.17	0.95	79.2	83.4	50.1
FALSE	High	IsMasterProtein	P48582	BRO1	D6W3T3; P48582; Q02823; sce:YPL084W	Vacuolar-sorting protein BRO1 [OS=Saccharomyces cerevisiae S288C]	406.776	0	68	64	129	62	62	97.2	395.46	68	129	64	138	2	3.427	0.797	4.748	1.594	1.78	-0.33	2.25	0.67	0.00311044	0.834517	0.000738971	0.223026	0.0552424	1	0.0405212	0.648753	154.1	35.8	213.4	71.7	45	0.75	9.26	13.96	32.41	3.5	157.4	155.8	38.9
FALSE	High	IsMasterProtein	P14907	NSP1	D6VWE3; P14907; sce:YJL041W	Nucleoporin NSP1 [OS=Saccharomyces cerevisiae S288C]	140.575	0	40	24	36	24	24	86.5	111.03	40	36	24	80	0	1.202	0.319	0.932	0.512	0.27	-1.65	-0.1	-0.97	0.803777	0.000973024	0.995585	0.00994976	1	0.0744688	1	0.107375	164.1	43.6	127.2	69.9	136.5	13.38	4.46	29.21	11.74	5.08	152.5	184.4	43.2
FALSE	High	IsMasterProtein	P53622	COP1	D6VRK3; P53622; Q07595; sce:YDL145C	Coatomer subunit alpha [OS=Saccharomyces cerevisiae S288C]	205.582	0	42	46	64	46	46	135.5	195.57	42	64	46	63	0	0.84	1.871	0.948	0.754	-0.25	0.9	-0.08	-0.41	0.953695	0.137652	0.999791	0.999373	1	0.580974	1	1	76.5	170.4	86.4	68.7	91.1	1.17	7.13	3.22	42.29	2.35	73.9	75.2	174.6
FALSE	Medium	IsMasterProtein	P25656	CDC50	D6VR94; P25656; sce:YCR094W	Cell division control protein 50 [OS=Saccharomyces cerevisiae S288C]	1.886	20	2	1	1	1	1	45	2.02	2	1	1	71	0	100	100	100	62.821	6.64	6.64	6.64	5.97									241.5	90.5	198.7	56.1	0.9	23.93	29.68	8.17	90.22		286.4	203.5	112
FALSE	Medium	IsMasterProtein	Q07844	RIX7	D6VXX1; Q07844; sce:YLL034C	Ribosome biogenesis ATPase RIX7 [OS=Saccharomyces cerevisiae S288C]	1.62	35	2	1	1	1	1	93	2.5	2	1	1	106	0
FALSE	High	IsMasterProtein	P38321		D6VQM1; P38321; sce:YBR225W	Uncharacterized protein YBR225W [OS=Saccharomyces cerevisiae S288C]	6.192	0	2	1	1	1	1	101.2	4.13	2	1	1	0	0	0.463	0.721	0.68	0.676	-1.11	-0.47	-0.56	-0.56	0.0869274	0.719893	0.584785	0.450684	0.354344	1	1	0.98075	59.9	93.2	87.8	87.4	129.2	19.84	4.64	8.32	32.9	23.88	52	68.9	96.3
FALSE	High	IsMasterProtein	P14843	ARO3	D6VS23; P14843; sce:YDR035W	Phospho-2-dehydro-3-deoxyheptonate aldolase, phenylalanine-inhibited [OS=Saccharomyces cerevisiae S288C]	44.23	0	35	10	12	7	7	41	38.27	35	12	10	37	0	1.348	0.581	1.111	0.969	0.43	-0.78	0.15	-0.05	0.997241	0.961819	0.999983	0.886075	1	1	1	1	130.9	56.4	107.9	94.1	97.1	5.31	4.52	6.28	127.41	13.11	87	80.7	35
FALSE	Medium	IsMasterProtein	P40460	NDC80	D6VVE3; P40460; sce:YIL144W	Kinetochore protein NDC80 [OS=Saccharomyces cerevisiae S288C]	1.406	50	1	1	1	1	1	80.4	2.76	1	1	1	65	0
FALSE	Medium	IsMasterProtein	Q12221	PUF2	D6W451; Q02573; Q04142; Q12221; Q7LH42; Q7LH98; sce:YPR042C	mRNA-binding protein PUF2 [OS=Saccharomyces cerevisiae S288C]	1.256	63	1	1	1	1	1	119.4	2.29	1	1	1	94	0	0.997	0.821	1.357	3.577	0	-0.29	0.44	1.84	1	0.903488	0.649423	0.00145798	1	1	1	0.0310225	67.1	55.3	91.4	240.9	67.4	28.38	32.87	19.89	7.21	2.47	72.6	48.3	61.8
FALSE	Medium	None	P36002	PTK1	D6VX02; P36002; P36045; Q06941; sce:YKL198C	Serine/threonine-protein kinase PTK1/STK1 [OS=Saccharomyces cerevisiae S288C]	1.946	17	1	1	1	0	1	73.5	2.24	1	1	1	61	0	16.387	3.27	10.668	4.083	4.03	1.71	3.42	2.03	0.000541754	0.0431274	0.00136672	0.0198618	0.0231512	0.29296	0.0506569	0.140871	264.5	52.8	172.2	65.9	16.1	8.65	12.98	14.76	47.56	0.87	301.1	266.3	62
FALSE	High	IsMasterProtein	P25441	RPC53	D6VRJ8; P25441; Q12073; sce:YDL150W	DNA-directed RNA polymerase III subunit RPC4 [OS=Saccharomyces cerevisiae S288C]	4.052	3	6	1	1	1	1	46.6	4.85	6	1	1	68	0	0.28	0.321	0.307	0.233	-1.84	-1.64	-1.7	-2.1	0.172581	0.243683	0.217536	0.109469	0.502013	0.840084	0.670103	0.409705	58.4	67.1	64.1	48.8	208.8	23.15	5.22	1.47	36.96	25.29	50.1	69.7	65.4
FALSE	High	IsMasterProtein	P00549	CDC19	D6VPH8; P00549; Q2VQG5; sce:YAL038W	Pyruvate kinase 1 [OS=Saccharomyces cerevisiae S288C]	217.267	0	67	30	57	29	30	54.5	207.65	67	57	30	85	0	0.513	2.332	0.899	0.987	-0.96	1.22	-0.15	-0.02	0.0196431	0.00532386	0.970655	0.970289	0.145612	0.123318	1	1	45.8	208	80.2	88.1	89.2	5.02	23.62	1.77	14.06	9.37	45	48.3	250.8
FALSE	High	IsMasterProteinCandidate	P25384	TY2B-C	D6VQZ4; P25384; P87006; sce:YCL019W	Transposon Ty2-C Gag-Pol polyprotein [OS=Saccharomyces cerevisiae S288C]	23.005	0	5	6	7	0	5	202	20.97	5	7	6	97	0	2.392	1.145	2.81	3.232	1.26	0.2	1.49	1.69	0.0956673	0.994179	0.0460419	0.0123355	0.355734	1	0.276497	0.107375	123.9	59.3	145.6	167.4	51.8	10.35	8.48	17.49	46.9	2.08	120.5	104.1	50.5
FALSE	High	IsMasterProtein	P13185	KIN1	D6VSA8; P13185; Q04606; sce:YDR122W	Serine/threonine protein kinase KIN1 [OS=Saccharomyces cerevisiae S288C]	7.144	0	3	2	2	2	2	120	5.34	3	2	2	99	0	0.406	0.592	0.781	0.588	-1.3	-0.76	-0.36	-0.77	0.166991	0.586201	0.958935	0.576305	0.491982	1	1	1	55.8	81.3	107.3	80.8	137.5	6.77	15.97	39.32	23.62	21.71	61.6	56	95.8
FALSE	High	IsMasterProtein	Q04217	ECM16	D6VZV1; Q04217; sce:YMR128W	Probable ATP-dependent RNA helicase DHR1 [OS=Saccharomyces cerevisiae S288C]	2.057	10	1	1	1	1	1	144.9	1.84	1	1	1	84	0
FALSE	High	IsMasterProtein	P32481	GCD11	D3DLS4; P32481; sce:YER025W	Eukaryotic translation initiation factor 2 subunit gamma [OS=Saccharomyces cerevisiae S288C]	46.915	0	23	11	13	11	11	57.8	29.04	23	13	11	123	0	0.568	1.093	0.607	0.542	-0.82	0.13	-0.72	-0.88	0.474185	0.999536	0.5862	0.789207	0.914689	1	1	1	73.2	140.8	78.2	69.9	128.9	0.93	17.5	5.67	55.41	23.66	69.2	70.1	151.7
FALSE	High	IsMasterProteinCandidate	P34164	SIP2	D6VTU7; P34164; sce:YGL208W	SNF1 protein kinase subunit beta-2 [OS=Saccharomyces cerevisiae S288C]	3.967	3	2	1	1	0	1	46.4	2.91	2	1	1	109	0	9.474	5.007	11.193	7.449	3.24	2.32	3.48	2.9	0.0239336	0.107102	0.0165683	0.0287945	0.167705	0.505978	0.171504	0.167944	151.3	80	178.7	118.9	16	7.59	0.45	12.24	16.75	95.35	139.5	155.4	78.1
FALSE	High	IsMasterProtein	Q12159	YRA1	D6VT14; Q12159; sce:YDR381W	RNA annealing protein YRA1 [OS=Saccharomyces cerevisiae S288C]	3.562	3	4	1	1	1	1	24.9	2.35	4	1	1	97	0	0.674	0.919	0.753	0.984	-0.57	-0.12	-0.41	-0.02	0.823075	0.999765	0.944137	0.999474	1	1	1	1	73.9	100.8	82.7	108	109.7	10.12	32.22	5.53	47.98	24.31	78.1	67.7	78.6
FALSE	High	IsMasterProtein	P05374	CHO2	D6VUT7; P05374; sce:YGR157W	Phosphatidylethanolamine N-methyltransferase [OS=Saccharomyces cerevisiae S288C]	6.099	0	3	2	2	2	2	101.1	5.33	3	2	2	55	0	0.612	0.816	0.812	0.583	-0.71	-0.29	-0.3	-0.78	0.395876	0.941877	0.937046	0.317352	0.848622	1	1	0.787335	75.8	101	100.6	72.1	123.8	27.4	42.16	3.33	18.19	15.3	98.6	66.6	146.9
FALSE	High	IsMasterProtein	P27692	SPT5	D6VZG4; P27692; sce:YML010W	Transcription elongation factor SPT5 [OS=Saccharomyces cerevisiae S288C]	53.96	0	17	14	15	14	14	115.6	41.95	17	15	14	178	0	0.245	0.234	0.337	0.272	-2.03	-2.1	-1.57	-1.88	0.0516843	0.0443668	0.146451	0.128006	0.268671	0.296302	0.532036	0.46544	62.4	59.5	85.7	69.1	254.1	20.72	13.75	0.7	68.74	18.38	67.8	50.5	61.5
FALSE	High	IsMasterProtein	P48415	SEC16	D6W3T2; P48415; Q02822; sce:YPL085W	COPII coat assembly protein SEC16 [OS=Saccharomyces cerevisiae S288C]	211.306	0	22	40	52	40	40	241.5	157.28	22	52	40	86	0	0.712	0.386	0.711	1.426	-0.49	-1.37	-0.49	0.51	0.782662	0.0623448	0.782226	0.997319	1	0.363309	1	1	78.9	42.8	78.9	158.1	110.9	8.49	5.5	12.03	40.23	3.15	85.1	75.5	41.8
FALSE	Medium	IsMasterProtein	P15565	TRM1	D6VSA6; P15565; Q9URQ7; Q9URQ8; sce:YDR120C	tRNA (guanine(26)-N(2))-dimethyltransferase, mitochondrial [OS=Saccharomyces cerevisiae S288C]	1.832	21	2	1	1	1	1	64	2.11	2	1	1	70	0	0.831	1.1	0.734	1.098	-0.27	0.14	-0.45	0.13	0.999941	0.999998	0.999273	0.906199	1	1	1	1	88.1	116.6	77.8	116.4	106	2.18	22.88	12.07	149.73	1.14	37	38.1	58.5
FALSE	High	IsMasterProteinCandidate	P32835	GSP1	D6VYT9; P32835; sce:YLR293C	GTP-binding nuclear protein GSP1/CNR1 [OS=Saccharomyces cerevisiae S288C]	17.546	0	13	3	4	0	3	24.8	11.96	13	4	3	120	0	0.519	0.809	0.46	0.837	-0.95	-0.31	-1.12	-0.26	0.329074	0.972535	0.202773	0.891647	0.745631	1	0.640941	1	71.7	111.7	63.6	115.6	138.1	9.69	18.68	1.35	44.49	25.2	66.2	76	126.2
FALSE	High	IsMasterProtein	P29509	TRR1	D6VSY3; P29509; sce:YDR353W	Thioredoxin reductase 1 [OS=Saccharomyces cerevisiae S288C]	11.222	0	8	1	3	0	1	34.2	4.5	8	3	1	74	0	0.342	0.33	0.401	0.415	-1.55	-1.6	-1.32	-1.27	0.0411153	0.0353721	0.0834438	0.0501041	0.22822	0.268369	0.380072	0.247456	59.4	57.3	69.6	72	173.6	22.64	21.86	4.87	22.16	40.13	50.8	70.2	49.4
FALSE	High	IsMasterProtein	P47035	NET1	D6VWA8; P47035; sce:YJL076W	Nucleolar protein NET1 [OS=Saccharomyces cerevisiae S288C]	236.241	0	39	49	65	49	49	128.5	175.56	39	65	49	122	0	0.203	0.144	0.206	0.124	-2.3	-2.8	-2.28	-3.01	0.000105755	2.89555e-05	0.000112184	9.50131e-06	0.010126	0.0253671	0.0255563	0.003639	67.9	48	68.9	41.5	334.7	31.75	5.36	4.63	5.71	9.73	89	56.3	52
FALSE	High	IsMasterProtein	P32911	SUI1	D6W0U9; P32911; sce:YNL244C	Eukaryotic translation initiation factor eIF-1 [OS=Saccharomyces cerevisiae S288C]	11.706	0	27	2	2	2	2	12.3	8.15	27	2	2	83	0	0.714	0.27	0.645	0.558	-0.49	-1.89	-0.63	-0.84	0.92925	0.0649895	0.825602	0.299298	1	0.370987	1	0.768582	112.3	42.5	101.4	87.8	157.3	29.47	4.72	16.27	49.11	32.84	92.2	140.7	41.6
FALSE	High	IsMasterProtein	P23615	SPT6	D6VUP7; P23615; sce:YGR116W	Transcription elongation factor SPT6 [OS=Saccharomyces cerevisiae S288C]	19.769	0	5	5	5	5	5	168.2	11.58	5	5	5	211	0	1.874	2.578	2.25	1.97	0.91	1.37	1.17	0.98	0.516903	0.184612	0.294309	0.213478	0.958887	0.70645	0.830864	0.635457	99.2	136.5	119.1	104.3	52.9	0.3	25.78	5.33	53.68	33.69	92.2	91.8	152.1
FALSE	High	None	P19657	PMA2	D6W3X8; P19657; sce:YPL036W	Plasma membrane ATPase 2 [OS=Saccharomyces cerevisiae S288C]	164.663	0	24	20	40	0	20	102.1	144.79	24	40	20	85	0	0.542	1.451	0.716	0.833	-0.88	0.54	-0.48	-0.26	0.511724	0.866314	0.908191	0.993128	0.955557	1	1	1	59.8	160.2	79.1	91.9	110.4	14.5	12.65	8	66.66	9.29	58.8	47.9	155.6
FALSE	High	IsMasterProtein	P15274	AMD1	D6VZE0; P15274; sce:YML035C	AMP deaminase [OS=Saccharomyces cerevisiae S288C]	30.899	0	15	10	12	10	10	93.2	25.96	15	12	10	87	0	1.496	1.272	1.426	1.515	0.58	0.35	0.51	0.6	0.0241212	0.205983	0.0445935	0.0108785	0.167971	0.757912	0.276497	0.107375	114.1	97	108.7	115.5	76.2	0.68	7.17	7.25	9.32	13.85	112.7	111.6	100.3
FALSE	High	IsMasterProtein	P47103	CPR7	D6VWK5; P47103; Q92323; sce:YJR032W	Peptidyl-prolyl cis-trans isomerase CYP7 [OS=Saccharomyces cerevisiae S288C]	4.505	1	3	1	1	1	1	45.1	3.61	3	1	1	35	0
FALSE	High	IsMasterProtein	P38692	KIC1	D3DL52; P38692; sce:YHR102W	Serine/threonine-protein kinase KIC1 [OS=Saccharomyces cerevisiae S288C]	28.861	0	10	6	7	6	6	117	23.15	10	7	6	72	0	1.081	0.775	1.101	0.763	0.11	-0.37	0.14	-0.39	0.998511	0.809581	0.996141	0.280338	1	1	1	0.744174	121.8	87.3	123.9	85.9	112.6	15.46	12.07	0.13	30.49	13.24	140.7	113	82.9
FALSE	High	IsMasterProtein	Q04869		D6W0E2; Q04869; sce:YMR315W	Uncharacterized protein YMR315W [OS=Saccharomyces cerevisiae S288C]	2.419	5	2	1	1	1	1	38.2	1.72	2	1	1	37	0	0.775	1.572	0.907	0.641	-0.37	0.65	-0.14	-0.64	0.721775	0.254467	0.99169	0.267628	1	0.862165	1	0.72696	76.6	155.5	89.7	63.4	98.9	19.31	8.84	3.81	18.02	25.4	94.5	71.8	177.9
FALSE	High	IsMasterProtein	Q05506		D6VSX2; Q05506; sce:YDR341C	Arginine--tRNA ligase, cytoplasmic [OS=Saccharomyces cerevisiae S288C]	185.795	0	52	33	51	32	32	69.5	163.25	52	51	33	77	1	2.833	0.932	2.335	0.988	1.5	-0.1	1.22	-0.02	0.000544024	0.989597	0.00195025	0.999939	0.0231512	1	0.0622454	1	173.9	57.2	143.3	60.7	61.4	4.68	2.1	19.59	3.85	2.36	172.9	184.7	59.7
FALSE	High	IsMasterProtein	P25358	ELO2	D6VR44; P25358; sce:YCR034W	Elongation of fatty acids protein 2 [OS=Saccharomyces cerevisiae S288C]	3.719	3	3	1	1	1	1	40	3.26	3	1	1	83	0
FALSE	High	IsMasterProtein	P48412	UPF3	D6VUK5; E9P8W8; P48412; sce:YGR072W	Nonsense-mediated mRNA decay protein 3 [OS=Saccharomyces cerevisiae S288C]	4.528	1	3	2	2	2	2	44.9	4.21	3	2	2	99	0	1.243	1.536	1.393	1.282	0.31	0.62	0.48	0.36	0.998622	0.970918	0.990454	0.999313	1	1	1	1	90.9	112.4	101.9	93.8	73.1	14.69	20.93	1.82	70.92	34.99	103.5	84	99.3
FALSE	High	IsMasterProtein	P32497	NIP1	D6W0D6; P32497; sce:YMR309C	Eukaryotic translation initiation factor 3 subunit C [OS=Saccharomyces cerevisiae S288C]	25.772	0	9	7	7	7	7	93.1	14.7	9	7	7	87	0	1.704	2.107	1.53	1.31	0.77	1.08	0.61	0.39	0.0817631	0.0168209	0.189845	0.466675	0.344124	0.185676	0.619692	0.996671	111.9	138.4	100.4	86	65.7	6.65	0.03	2.23	6.65	36.08	107.3	117.9	139.1
FALSE	High	IsMasterProtein	P36123	SAP190	D6VX93; P36123; sce:YKR028W	SIT4-associating protein SAP190 [OS=Saccharomyces cerevisiae S288C]	3.447	3	1	1	1	1	1	117	2.75	1	1	1	85	0
FALSE	High	IsMasterProtein	Q04439	MYO5	D6VZT2; Q04439; sce:YMR109W	Myosin-5 [OS=Saccharomyces cerevisiae S288C]	32.229	0	7	9	11	7	7	136.8	24.55	7	11	9	134	2	2.368	4.529	2.837	1.789	1.24	2.18	1.5	0.84	0.156869	0.0125337	0.075253	0.645768	0.478096	0.169278	0.367939	1	100.3	191.7	120.1	75.7	42.3	21.88	21.76	9.08	28.97	14.29	120.1	87.9	229.4
FALSE	High	IsMasterProtein	Q12449	AHA1	D6VSJ8; Q02565; Q12449; Q7LIE3; sce:YDR214W	Hsp90 co-chaperone AHA1 [OS=Saccharomyces cerevisiae S288C]	8.619	0	7	3	3	3	3	39.4	7.21	7	3	3	24	0	2.033	2.221	2.13	1.994	1.02	1.15	1.09	1	0.86094	0.799375	0.829769	0.999999	1	1	1	1	115.2	125.8	120.7	112.9	56.7	1.56	26.04	9.41	69.68	11.22	120.5	123.2	160.4
FALSE	High	None	Q12117	MRH1	D6VS17; Q12117; sce:YDR033W	Protein MRH1 [OS=Saccharomyces cerevisiae S288C]	2.317	5	3	1	1	0	1	36.2	2.41	3	1	1	9	0
FALSE	Medium	None	Q05854		D6VYS5; Q05854; sce:YLR278C	Uncharacterized transcriptional regulatory protein YLR278C [OS=Saccharomyces cerevisiae S288C]	1.674	33	0	1	1	0	1	151.2	1.81	0	1	1	87	0
FALSE	High	IsMasterProtein	P0CX49	RPL18A	D6W0P3; P07279; P0CX49; sce:YNL301C; sce:YOL120C	60S ribosomal protein L18-A [OS=Saccharomyces cerevisiae S288C]	33.215	0	42	9	11	9	9	20.6	24.1	42	11	9	51	0	0.509	1.832	0.749	0.888	-0.98	0.87	-0.42	-0.17	0.0909354	0.1392	0.722347	0.945748	0.355734	0.583218	1	1	51.6	185.7	75.9	90	101.4	25.99	24.01	4.79	23.67	10.41	62.4	43	221.5
FALSE	High	IsMasterProteinCandidate	P48570	LYS20	D6VRH0; P48570; sce:YDL182W	Homocitrate synthase, cytosolic isozyme [OS=Saccharomyces cerevisiae S288C]	25.133	0	16	5	6	0	5	47.1	18.03	16	6	5	62	0	0.577	0.459	0.461	0.824	-0.79	-1.12	-1.12	-0.28	0.128806	0.0284722	0.0294695	0.660031	0.415724	0.236855	0.244751	1	83.9	66.7	67.1	119.9	145.4	9.53	0.34	20.67	20.16	29.71	77.7	88.9	66
FALSE	Medium	None	P52960	PIP2	D6W358; P52960; sce:YOR363C	Peroxisome proliferation transcriptional regulator [OS=Saccharomyces cerevisiae S288C]	1.783	26	1	1	1	0	1	114.6	2.11	1	1	1	140	0	1.764	1.232	0.94	0.232	0.82	0.3	-0.09	-2.11	0.906434	0.998709	0.999997	0.244529	1	1	1	0.692029	190	132.7	101.3	25	107.7	36.28	46.07	74.26	8.3	3.12	250	147.9	95.7
FALSE	High	IsMasterProtein	P04147	PAB1	D3DM73; P04147; sce:YER165W	Polyadenylate-binding protein, cytoplasmic and nuclear [OS=Saccharomyces cerevisiae S288C]	415.554	0	76	45	113	45	45	64.3	385.54	76	113	45	107	0	1.22	0.743	1.597	4.046	0.29	-0.43	0.68	2.02	0.996412	0.978761	0.87806	0.191631	1	1	1	0.600053	76.1	46.3	99.6	252.3	62.3	2.75	2.11	5.85	60.28	3.92	74.6	71.8	43.9
FALSE	High	IsMasterProtein	Q03390	VPS60	D6VTA9; Q03390; sce:YDR486C	Vacuolar protein-sorting-associated protein 60 [OS=Saccharomyces cerevisiae S288C]	14.997	0	9	1	2	1	1	25.8	10.36	9	2	1	59	0	2.088	1.016	1.507	1.007	1.06	0.02	0.59	0.01	0.170833	1	0.648782	1	0.49946	1	1	1	164.3	79.9	118.6	79.2	78.7	30.78	6.68	3.94	37.38	28.84	132	205.5	84
FALSE	Low	IsMasterProtein	P87275	AIM11	D3DM01; P87275; sce:YER093C-A	Altered inheritance of mitochondria protein 11 [OS=Saccharomyces cerevisiae S288C]	0.894	92	8	1	1	1	1	15.7	2.97	8	1	1	5	0	2.47	4.174	3.521	3.14	1.3	2.06	1.82	1.65	0.150449	0.0202745	0.0379643	0.0918155	0.463447	0.197246	0.276497	0.372877	92.5	156.3	131.8	117.6	37.4	15.54	9.49	5.34	32.66	0.83	84.2	105	148.5
FALSE	High	IsMasterProtein	Q07528	ATG20	D6VRN7; Q07528; sce:YDL113C	Autophagy-related protein 20 [OS=Saccharomyces cerevisiae S288C]	10.61	0	5	3	3	3	3	72.5	7.26	5	3	3	79	0	1.245	0.812	1.26	0.824	0.32	-0.3	0.33	-0.28	0.989931	0.991932	0.987305	0.995423	1	1	1	1	124.7	81.3	126.2	82.5	100.1	7.21	0.41	10.1	74.65	5.06	116.9	105.5	72.2
FALSE	High	IsMasterProtein	P24783	DBP2	D6W169; P24783; Q05456; sce:YNL112W	ATP-dependent RNA helicase DBP2 [OS=Saccharomyces cerevisiae S288C]	36.893	0	18	9	9	8	8	61	27.91	18	9	9	167	0	1.245	1.258	1.225	0.955	0.32	0.33	0.29	-0.07	0.80371	0.775811	0.846802	0.935276	1	1	1	1	113.9	115	112	87.3	91.4	9.33	10.34	10.94	22.86	2.26	109	124.3	126.5
FALSE	Medium	IsMasterProtein	P14922	CYC8	D6VQB2; P14922; sce:YBR112C	General transcriptional corepressor CYC8 [OS=Saccharomyces cerevisiae S288C]	1.965	13	1	1	1	1	1	107.1	0	1	1	1	128	0
FALSE	High	IsMasterProtein	P23248	RPS1B	D6VZB0; P23248; sce:YML063W	40S ribosomal protein S1-B [OS=Saccharomyces cerevisiae S288C]	72.911	0	65	19	25	4	4	28.8	67.51	65	25	19	64	12	0.994	1.896	1.068	0.964	-0.01	0.92	0.09	-0.05	1	0.212288	0.999724	0.999803	1	0.77367	1	1	80	152.6	85.9	77.6	80.5	8.38	28.49	3.83	32.25	15.62	85.3	75.7	187.9
FALSE	High	IsMasterProtein	P38281	APD1	D6VQE6; P38281; sce:YBR151W	Actin patches distal protein 1 [OS=Saccharomyces cerevisiae S288C]	4.077	3	7	1	1	1	1	35.7	3.09	7	1	1	1	0	0.28	0.25	0.212	0.213	-1.84	-2	-2.23	-2.23	0.090649	0.0651439	0.0407528	0.0410419	0.355734	0.370987	0.276497	0.218406	62.2	55.6	47.2	47.3	222.2	15.52	9.91	65.13	23.16	31.51	58.6	73	62.7
FALSE	High	None	Q92392	TY1A-OL	D6W1W4; Q92392; sce:YOL103W-A	Transposon Ty1-OL Gag polyprotein [OS=Saccharomyces cerevisiae S288C]	69.098	0	38	13	18	0	3	49	56.12	38	18	13	21	0	1.487	1.163	1.427	3.794	0.57	0.22	0.51	1.92	0.118019	0.835584	0.175461	7.20385e-05	0.394197	1	0.591669	0.00752475	86.1	67.3	82.6	219.6	57.9	10.46	6.39	2.92	15.73	14.99	83.4	71.9	63.4
FALSE	High	IsMasterProtein	P38861	NMD3	D3DLB9; P38861; sce:YHR170W	60S ribosomal export protein NMD3 [OS=Saccharomyces cerevisiae S288C]	8.526	0	5	1	1	1	1	59.1	4.41	5	1	1	55	0
FALSE	High	IsMasterProtein	Q06412	TUS1	D6VZ61; Q06412; sce:YLR425W	Rho1 guanine nucleotide exchange factor TUS1 [OS=Saccharomyces cerevisiae S288C]	26.714	0	6	6	6	6	6	149	21.91	6	6	6	63	0	0.678	0.538	1.044	0.729	-0.56	-0.9	0.06	-0.46	0.33798	0.0685085	0.99982	0.506253	0.758474	0.374345	1	1	89.3	70.8	137.4	96	131.7	9.03	31.99	23.64	10.23	15.67	94.2	82.9	55.7
FALSE	High	IsMasterProtein	P07251	ATP1	D6VPQ6; P07251; Q92449; sce:YBL099W	ATP synthase subunit alpha, mitochondrial [OS=Saccharomyces cerevisiae S288C]	8.521	0	5	3	3	3	3	58.6	6.68	5	3	3	142	0	0.541	1.312	0.724	0.78	-0.89	0.39	-0.47	-0.36	0.760924	0.988615	0.975871	0.99986	1	1	1	1	64.2	155.7	85.9	92.6	118.7	22.44	38.47	8.27	85.3	4.42	64.3	46.7	175.8
FALSE	High	IsMasterProtein	P38081		D6VQ55; P38081; sce:YBR056W	Uncharacterized glycosyl hydrolase YBR056W [OS=Saccharomyces cerevisiae S288C]	30.558	0	17	7	9	7	7	57.8	28.53	17	9	7	47	0	1.575	0.765	1.996	0.557	0.66	-0.39	1	-0.84	0.216982	0.662196	0.0419312	0.0515338	0.582997	1	0.276497	0.249841	139.7	67.9	177	49.4	88.7	9.22	2.37	1.93	30.27	10.76	135.8	154.7	71.6
FALSE	High	IsMasterProtein	P35197	GCS1	D6VRC9; P35197; sce:YDL226C	ADP-ribosylation factor GTPase-activating protein GCS1 [OS=Saccharomyces cerevisiae S288C]	67.022	0	40	12	16	11	12	39.3	53.69	40	16	12	82	0	1.847	0.714	1.407	1.155	0.89	-0.49	0.49	0.21	0.00352801	0.0762786	0.0727138	0.518116	0.0552424	0.407292	0.363253	1	158.4	61.2	120.6	99	85.8	2.68	3.4	12.34	15.84	2.16	160.5	154.5	59.4
FALSE	High	IsMasterProtein	P52910	ACS2	D6VYE8; P52910; sce:YLR153C	Acetyl-coenzyme A synthetase 2 [OS=Saccharomyces cerevisiae S288C]	59.134	0	19	13	17	13	13	75.4	54.95	19	17	13	127	0	0.81	2.478	1.203	1.267	-0.3	1.31	0.27	0.34	0.847877	0.0132794	0.901644	0.742863	1	0.171592	1	1	57.3	175.1	85	89.5	70.7	13.57	36.83	3.97	15.1	12.5	62.8	51.8	227.9
FALSE	High	IsMasterProtein	P48836	VMA10	D3DKY7; P48836; sce:YHR039C-A	V-type proton ATPase subunit G [OS=Saccharomyces cerevisiae S288C]	41.734	0	50	7	9	7	7	12.7	27.69	50	9	7	89	0	2.751	0.635	2.241	0.909	1.46	-0.66	1.16	-0.14	0.406669	0.930205	0.608688	0.838791	0.856085	1	1	1	200.7	46.3	163.5	66.3	73	7.07	9.94	0.26	62.61	11.69	222.9	201.7	45.6
FALSE	High	IsMasterProtein	P0CX25	RPL43A	D6VWR3; P0CX25; P49631; sce:YJR094W-A; sce:YPR043W	60S ribosomal protein L43-A [OS=Saccharomyces cerevisiae S288C]	40.76	0	65	7	10	7	7	10.1	37.02	65	10	7	50	0	0.459	1.341	0.669	1.071	-1.12	0.42	-0.58	0.1	0.306987	0.943737	0.831055	1	0.718711	1	1	1	50.3	146.8	73.2	117.2	109.5	22.63	10.28	4.81	48.51	5.01	57.3	41.5	153.2
FALSE	High	IsMasterProtein	Q06440	CRN1	D6VZ64; Q06440; sce:YLR429W	Coronin-like protein [OS=Saccharomyces cerevisiae S288C]	58.703	0	27	15	18	15	15	72.5	49.3	27	18	15	73	0	1.811	0.738	1.844	1.078	0.86	-0.44	0.88	0.11	0.00067115	0.030365	0.000555114	0.891488	0.0249915	0.242077	0.0354348	1	149.9	61.1	152.7	89.3	82.8	8.54	1.21	9.53	5.56	9.04	160.6	142.3	61
FALSE	High	IsMasterProtein	P48164	RPS7B	D6W184; P48164; sce:YNL096C	40S ribosomal protein S7-B [OS=Saccharomyces cerevisiae S288C]	13.457	0	20	4	4	1	1	21.6	10.57	20	4	4	72	0	0.396	0.679	0.402	0.864	-1.34	-0.56	-1.32	-0.21	0.138463	0.808892	0.146784	0.691057	0.437072	1	0.532036	1	52.3	89.7	53.1	114.2	132.1	16.26	22.34	4.49	44.17	9.57	48.1	60.6	108.5
FALSE	High	IsMasterProtein	P39015	STM1	D6VYE5; P39015; sce:YLR150W	Suppressor protein STM1 [OS=Saccharomyces cerevisiae S288C]	131.054	0	68	21	36	21	21	30	105.03	68	36	21	102	0	3.3	0.584	2.153	1.092	1.72	-0.78	1.11	0.13	0.0123975	0.320499	0.100325	0.827428	0.11037	0.992296	0.417658	1	183.7	32.5	119.9	60.8	55.7	13.62	4.13	8.94	45.78	0.56	200.6	165.3	33.2
FALSE	High	IsMasterProtein	P48361	ASK10	D6VUM9; P48361; sce:YGR097W	Activator of SKN7 protein 10 [OS=Saccharomyces cerevisiae S288C]	17.284	0	6	5	5	3	3	126.8	12.54	6	5	5	44	0	0.585	0.391	0.633	0.341	-0.77	-1.36	-0.66	-1.55	0.193673	0.0212031	0.302019	0.0111043	0.544083	0.203417	0.839128	0.107375	103.5	69.1	112	60.4	176.9	15.97	12.16	0.76	14.7	38.57	123.9	98.7	80.5
FALSE	High	IsMasterProtein	Q08229	NBA1	D6W1Z7; Q08229; sce:YOL070C	Protein NBA1 [OS=Saccharomyces cerevisiae S288C]	55.843	0	32	12	13	12	12	55.9	41.51	32	13	12	70	0	2.126	0.713	2.022	1.075	1.09	-0.49	1.02	0.1	0.546407	0.961854	0.606726	0.836403	0.988695	1	1	1	167	56	158.9	84.5	78.6	3.99	3.11	6.51	86.19	12.6	148.6	140.4	47.4
FALSE	Medium	IsMasterProtein	P32855	SEC8	D6W461; P32855; sce:YPR055W	Exocyst complex component SEC8 [OS=Saccharomyces cerevisiae S288C]	1.239	63	1	1	1	1	1	122.1	0	1	1	1	63	0
FALSE	High	IsMasterProtein	P49775	HNT2	D6VST4; P49775; Q6TQU2; Q6TQU3; sce:YDR305C	Bis(5'-adenosyl)-triphosphatase [OS=Saccharomyces cerevisiae S288C]	3.486	3	7	1	1	1	1	23.5	2.2	7	1	1	47	0	0.349	0.419	0.384	0.507	-1.52	-1.26	-1.38	-0.98	0.0306937	0.068604	0.0462032	0.168944	0.194845	0.374345	0.276497	0.553038	59.6	71.4	65.5	86.5	170.6	21.93	4.01	4.32	16.41	22.48	54.2	74.1	78.2
FALSE	High	IsMasterProtein	P53238	PEF1	D6VUJ3; P53238; sce:YGR058W	Peflin [OS=Saccharomyces cerevisiae S288C]	5.439	1	4	1	1	1	1	38.3	3.99	4	1	1	51	0	3.339	3.917	3.89	3.693	1.74	1.97	1.96	1.88	0.201704	0.134804	0.13713	0.156418	0.559259	0.575298	0.505007	0.530161	110.2	129.3	128.4	121.9	33	16.69	9.2	13.65	4.21	76.86	103.4	131	127.9
FALSE	High	None	P0C2J3	TY2B-LR1	D6VZ45; P0C2J3; sce:YLR410W-B	Transposon Ty2-LR1 Gag-Pol polyprotein [OS=Saccharomyces cerevisiae S288C]	17.136	0	4	5	6	0	5	202	16.45	4	6	5	97	0	2.392	1.145	2.81	3.232	1.26	0.2	1.49	1.69	0.0956673	0.994179	0.0460419	0.0123355	0.355734	1	0.276497	0.107375	123.9	59.3	145.6	167.4	51.8	10.35	8.48	17.49	46.9	2.08	120.5	104.1	50.5
FALSE	High	IsMasterProtein	P38697	IMD2	D3DLH1; P38697; sce:YHR216W	Inosine-5'-monophosphate dehydrogenase 2 [OS=Saccharomyces cerevisiae S288C]	89.912	0	33	13	19	3	6	56.5	71.83	33	19	13	92	7	0.485	0.749	0.953	0.655	-1.05	-0.42	-0.07	-0.61	0.0359113	0.612117	0.999718	0.260224	0.214126	1	1	0.715305	53.4	82.6	105.1	72.3	110.3	26.85	17.52	8.53	8.99	30.17	44.5	65.4	73.7
FALSE	High	IsMasterProtein	P40991	NOP2	D6W1B9; E9P914; P40991; sce:YNL061W	25S rRNA (cytosine(2870)-C(5))-methyltransferase [OS=Saccharomyces cerevisiae S288C]	15.211	0	11	4	5	4	4	69.8	14.08	11	5	4	85	0	0.565	1.174	0.742	0.699	-0.82	0.23	-0.43	-0.52	0.0491476	0.87932	0.431182	0.26632	0.262654	1	1	0.725122	66.9	138.9	87.9	82.8	118.3	16.66	11.39	1.47	21.4	3.91	59.6	75.5	151
FALSE	High	IsMasterProtein	P47165	XPT1	D6VWV1; P47165; sce:YJR133W	Xanthine phosphoribosyltransferase 1 [OS=Saccharomyces cerevisiae S288C]	4.982	1	5	1	1	1	1	23.7	3.59	5	1	1	82	0	2.133	2.21	2.355	1.231	1.09	1.14	1.24	0.3	0.0151823	0.0121437	0.00826343	0.718448	0.122848	0.169278	0.120186	1	125.2	129.7	138.2	72.2	58.7	0.72	4.05	26.45	18.66	11.74	134.1	135.5	135.7
FALSE	High	IsMasterProtein	P05759	RPS31	D6VYH3; P04838; P05759; P14800; P61864; Q6LA96; sce:YLR167W	Ubiquitin-40S ribosomal protein S31 [OS=Saccharomyces cerevisiae S288C]	42.599	0	53	10	15	5	10	17.2	37.37	53	15	10	104	0	0.862	1.427	1.034	0.844	-0.21	0.51	0.05	-0.24	0.976908	0.58953	0.99998	0.566173	1	1	1	1	84.4	139.7	101.2	82.6	97.9	15.85	4.8	4.42	30.51	8.62	97.7	78	149.5
FALSE	High	IsMasterProtein	P07258	CPA1	D6W302; P07258; sce:YOR303W	Carbamoyl-phosphate synthase arginine-specific small chain [OS=Saccharomyces cerevisiae S288C]	124.409	0	47	16	27	16	16	45.3	99.21	47	27	16	87	0	1.884	0.513	1.227	0.888	0.91	-0.96	0.29	-0.17	0.00270057	0.00197561	0.376264	0.564066	0.0536087	0.0805374	0.978117	1	182.5	49.7	118.8	86	96.8	16.39	2.95	3.37	12.63	3.01	164.7	207.9	49.4
FALSE	High	IsMasterProtein	P42945	UTP10	D6VW75; P42945; sce:YJL109C	U3 small nucleolar RNA-associated protein 10 [OS=Saccharomyces cerevisiae S288C]	7.76	0	3	2	3	2	2	200	7.67	3	3	2	114	0	0.099	0.303	0.258	0.217	-3.34	-1.72	-1.96	-2.2	0.021229	0.260831	0.178847	0.120069	0.15341	0.87608	0.599112	0.440765	23.6	72.5	61.6	51.9	238.9	42.17	10.98	45.05	43.32	36.03	17.6	32.5	79.6
FALSE	High	IsMasterProtein	Q08732	HRK1	D6W2W7; Q07224; Q08732; sce:YOR267C	Serine/threonine-protein kinase HRK1 [OS=Saccharomyces cerevisiae S288C]	3.637	3	2	1	1	1	1	85.6	3.07	2	1	1	59	0	3.612	2.81	3.258	2.583	1.85	1.49	1.7	1.37	0.0257436	0.0658283	0.037494	0.0918401	0.172572	0.37227	0.276158	0.372877	148.5	115.5	133.9	106.2	41.1	3.42	11.19	9.99	13.88	39.9	163.1	155.4	134.1
FALSE	High	IsMasterProtein	P40525	RPL34B	D6VVM9; P40525; sce:YIL052C	60S ribosomal protein L34-B [OS=Saccharomyces cerevisiae S288C]	17.231	0	37	5	6	0	5	13.6	15.83	37	6	5	50	0	1.652	3.402	1.846	1.789	0.72	1.77	0.88	0.84	0.47378	0.0191595	0.301051	0.352383	0.914689	0.194929	0.839128	0.829689	84.6	174.3	94.5	91.6	51.2	29.98	6.88	0.9	32.22	6.15	105	68.3	166.1
FALSE	High	IsMasterProtein	P05694	MET6	D3DLZ8; P05694; P38010; Q02488; Q27JJ8; sce:YER091C	5-methyltetrahydropteroyltriglutamate--homocysteine methyltransferase [OS=Saccharomyces cerevisiae S288C]	58.234	0	21	14	15	13	13	85.8	42.38	21	15	14	48	1	0.808	0.968	0.765	0.662	-0.31	-0.05	-0.39	-0.59	0.739404	0.999918	0.555697	0.219316	1	1	1	0.641206	90.9	109	86.1	74.5	112.5	1.03	18.02	9.74	20.91	16.38	90.7	92	124.5
FALSE	High	IsMasterProtein	Q99257	MEX67	D6W3J9; Q99257; sce:YPL169C	mRNA export factor MEX67 [OS=Saccharomyces cerevisiae S288C]	31.633	0	15	8	8	8	8	67.3	23.01	15	8	8	76	0	3.358	2.948	2.828	2.299	1.75	1.56	1.5	1.2	0.00661828	0.0124067	0.0153027	0.0118083	0.0800463	0.169278	0.164325	0.107375	141.3	124.1	119	96.8	42.1	9.1	7.74	1.82	31.51	7.97	143.5	126.2	124.8
FALSE	High	IsMasterProtein	P40509	SEC28	D6VVK8; P40509; sce:YIL076W	Coatomer subunit epsilon [OS=Saccharomyces cerevisiae S288C]	180.64	0	61	13	230	12	13	33.8	874.4	61	230	13	70	0	0.403	0.833	0.522	0.396	-1.31	-0.26	-0.94	-1.34	0.0310629	0.949066	0.132368	0.0134901	0.196106	1	0.495416	0.112634	59.6	123.3	77.4	58.6	148.1	32.94	12.19	10.15	20.16	6.94	48.4	77.8	116.3
FALSE	High	IsMasterProtein	P07260	CDC33	D6W1T0; P07260; sce:YOL139C	Eukaryotic translation initiation factor 4E [OS=Saccharomyces cerevisiae S288C]	19.407	0	40	8	8	8	8	24.2	10.67	40	8	8	120	0	3.216	0.419	1.655	1.647	1.69	-1.26	0.73	0.72	0.604802	0.816606	0.975352	0.998463	1	1	1	1	211.3	27.5	108.8	108.2	65.7	4	29.9	12.27	73.89	14.34	219.5	232.3	36.4
FALSE	High	IsMasterProtein	P39944	UBP5	D3DM51; P39944; sce:YER144C	Ubiquitin carboxyl-terminal hydrolase 5 [OS=Saccharomyces cerevisiae S288C]	9.139	0	3	3	3	3	3	92.2	7.54	3	3	3	47	0	0.812	1.085	0.951	2.59	-0.3	0.12	-0.07	1.37	0.999884	0.999999	1	0.386264	1	1	1	0.878253	65.3	87.2	76.4	208.2	80.4	7.26	16.9	10.48	148.96	31.84	17.4	19.3	27.6
FALSE	High	IsMasterProtein	P0CX48	RPS11B	D6VQ48; O11852; P0CX48; P26781; sce:YBR048W; sce:YDR025W	40S ribosomal protein S11-B [OS=Saccharomyces cerevisiae S288C]	57.462	0	53	9	12	9	9	17.7	42.43	53	12	9	82	0	0.329	0.878	0.416	0.438	-1.61	-0.19	-1.27	-1.19	0.111372	0.998695	0.249539	0.153823	0.387078	1	0.741273	0.526019	51.6	137.8	65.3	68.8	157	4.53	15.52	2.12	57.72	4.46	54.3	50.9	156.7
FALSE	High	IsMasterProtein	P39522	ILV3	D6VWJ2; P39522; sce:YJR016C	Dihydroxy-acid dehydratase, mitochondrial [OS=Saccharomyces cerevisiae S288C]	79.292	0	39	20	22	20	20	62.8	59.17	39	22	20	43	0	1.116	1.227	0.984	1.37	0.16	0.3	-0.02	0.45	0.998184	0.970848	1	0.917013	1	1	1	1	79.9	87.9	70.4	98.1	71.6	20.26	2.96	8.81	24.28	27.61	68.3	91.2	85
FALSE	High	IsMasterProtein	P28789	HEM3	D6VRE9; P28789; Q2VQW9; sce:YDL205C	Porphobilinogen deaminase [OS=Saccharomyces cerevisiae S288C]	22.509	0	19	4	4	4	4	36.7	15.79	19	4	4	44	0	0.792	0.516	0.658	0.502	-0.34	-0.95	-0.6	-0.99	0.865031	0.110678	0.430227	0.0680505	1	0.51233	1	0.306627	104.1	67.8	86.4	66	131.4	13.15	7.18	1.08	34.15	12.92	96.3	116	65.4
FALSE	High	IsMasterProtein	P25037	UBP1	D6VRM8; P25037; Q07543; sce:YDL122W	Ubiquitin carboxyl-terminal hydrolase 1 [OS=Saccharomyces cerevisiae S288C]	21.091	0	7	4	4	4	4	92.7	14.23	7	4	4	72	0	1.149	0.457	0.813	0.524	0.2	-1.13	-0.3	-0.93	0.98221	0.057632	0.914152	0.064237	1	0.350061	1	0.295233	139.1	55.3	98.5	63.5	121.1	18.53	2.71	4.6	34.26	6.52	125.3	163.1	58
FALSE	High	IsMasterProtein	P06105	SCP160	D6VWA3; P06105; sce:YJL080C	Protein SCP160 [OS=Saccharomyces cerevisiae S288C]	667.443	0	65	91	173	91	91	134.7	581.68	65	173	91	112	0	4.207	0.75	2.311	1.501	2.07	-0.41	1.21	0.59	0.0102433	0.890477	0.127106	0.400289	0.101145	1	0.488445	0.900062	216.9	38.7	119.1	77.4	51.6	3.44	4.78	4.25	52.29	14.06	217.2	206.9	39.1
FALSE	High	IsMasterProtein	P19097	FAS2	D6W3D9; P19097; Q12533; sce:YPL231W	Fatty acid synthase subunit alpha [OS=Saccharomyces cerevisiae S288C]	321.02	0	37	59	76	58	59	206.8	244.35	37	76	59	67	0	0.743	0.949	1.122	0.721	-0.43	-0.08	0.17	-0.47	0.844549	0.999923	0.996723	0.890965	1	1	1	1	49.7	63.5	75.1	48.3	66.9	7.69	11.1	6.29	45.68	1.57	53.4	47.9	69.8
FALSE	High	IsMasterProtein	P53172	SDS23	D6VU85; P53172; Q6B1R7; sce:YGL056C	Protein SDS23 [OS=Saccharomyces cerevisiae S288C]	22.908	0	13	6	6	5	6	58.1	13.73	13	6	6	93	0	5.601	3.355	4.19	1.69	2.49	1.75	2.07	0.76	0.00112013	0.00897965	0.00342506	0.150247	0.0338691	0.142381	0.0756807	0.516866	196.2	117.5	146.8	59.2	35	10.46	10.36	0.06	17.49	34.98	214.2	184.7	128.2
FALSE	High	IsMasterProtein	P28273	OXP1	D6VWY8; O60212; P28273; sce:YKL215C	5-oxoprolinase [OS=Saccharomyces cerevisiae S288C]	22.64	0	6	7	7	7	7	140.3	19.32	6	7	7	39	0	1.156	1.17	1.334	1.185	0.21	0.23	0.42	0.25	0.677048	0.611734	0.135451	0.649462	1	1	0.50224	1	93.4	94.5	107.7	95.7	80.8	15.06	9.45	1.33	7.65	10.38	104.7	84.6	101.8
FALSE	High	IsMasterProtein	P15180	KRS1	D6VS25; P15180; sce:YDR037W	Lysine--tRNA ligase, cytoplasmic [OS=Saccharomyces cerevisiae S288C]	66.133	0	30	15	21	15	15	67.9	61.25	30	21	15	77	0	2.254	1.191	1.464	1.285	1.17	0.25	0.55	0.36	0.0643254	0.96455	0.580688	0.715651	0.29564	1	1	1	160.4	84.7	104.2	91.4	71.1	20.52	4.33	0.1	34.98	19.48	136.3	182.5	80.8
FALSE	High	None	Q12230	LSP1	D6W408; Q12230; sce:YPL004C	Sphingolipid long chain base-responsive protein LSP1 [OS=Saccharomyces cerevisiae S288C]	22.298	0	7	2	3	0	2	38	12.79	7	3	2	72	0	100	100	100	100	6.64	6.64	6.64	6.64									347.7	71.5	108.8	63.1	0	27.83	1.41	63.55			472.4	317	80.4
FALSE	High	IsMasterProtein	P20676	NUP1	D6W2F9; P20676; sce:YOR098C	Nucleoporin NUP1 [OS=Saccharomyces cerevisiae S288C]	16.858	0	6	5	5	5	5	113.5	10.36	6	5	5	80	0	1.236	1.168	1.759	2.377	0.31	0.22	0.81	1.25	0.999607	0.999913	0.965737	0.999981	1	1	1	1	87.2	82.4	124	167.7	70.5	7.79	12.37	6.2	74.87	23.9	97.4	87.3	95.1
FALSE	High	IsMasterProtein	P15108	HSC82	D6W010; P15108; sce:YMR186W	ATP-dependent molecular chaperone HSC82 [OS=Saccharomyces cerevisiae S288C]	254.103	0	60	40	63	7	7	80.9	216.29	60	63	40	82	23	1.026	1.885	1.214	0.779	0.04	0.91	0.28	-0.36	0.999974	0.0366871	0.808074	0.345154	1	0.271722	1	0.824496	88.4	162.4	104.6	67.2	86.2	10.38	27.88	6.89	16.77	9.65	97.8	84.5	203.9
FALSE	High	IsMasterProtein	P38890	SET5	D3DLF6; P38890; sce:YHR207C	Putative protein lysine methyltransferase SET5 [OS=Saccharomyces cerevisiae S288C]	26.4	0	15	7	7	7	7	60.5	23.17	15	7	7	59	0	1.932	0.672	1.491	1.247	0.95	-0.57	0.58	0.32	0.019546	0.172927	0.169746	0.535724	0.145612	0.675239	0.591669	1	144.4	50.2	111.5	93.2	74.7	0.42	3.71	0.63	13.74	17.07	144.4	143.6	51.4
FALSE	High	IsMasterProtein	P27705	MIG1	D6VUA4; P27705; sce:YGL035C	Regulatory protein MIG1 [OS=Saccharomyces cerevisiae S288C]	2.218	5	1	1	1	1	1	55.5	1.67	1	1	1	160	0	0.473	0.241	0.418	0.472	-1.08	-2.06	-1.26	-1.08	0.270329	0.0202176	0.168764	0.260884	0.665114	0.197246	0.591188	0.715398	95.3	48.5	84.4	95.2	201.7	28.74	12.22	43.66	28.78	17.44	113.3	75	43.1
FALSE	High	IsMasterProtein	P38628	PCM1	D3DLJ2; P38628; sce:YEL058W	Phosphoacetylglucosamine mutase [OS=Saccharomyces cerevisiae S288C]	12.282	0	8	4	4	4	4	62	9.65	8	4	4	67	0	0.567	0.984	1.003	1.49	-0.82	-0.02	0	0.58	0.949144	1	1	0.815256	1	1	1	1	52.9	91.8	93.5	139	93.3	8.83	25.71	42.03	113.57	29.03	38.9	34.3	76.1
FALSE	High	IsMasterProtein	P40212	RPL13B	D6VZW4; P40212; sce:YMR142C	60S ribosomal protein L13-B [OS=Saccharomyces cerevisiae S288C]	28.76	0	31	7	8	0	7	22.5	23.86	31	8	7	56	0	0.683	1.542	0.887	1.509	-0.55	0.63	-0.17	0.59	0.863898	0.798235	0.998996	0.971097	1	1	1	1	60.9	137.6	79.1	134.6	89.2	15.76	12.8	8.76	37.07	25.18	67.6	54	149.6
FALSE	High	IsMasterProtein	P38764	RPN1	D3DKX4; P38764; sce:YHR027C	26S proteasome regulatory subunit RPN1 [OS=Saccharomyces cerevisiae S288C]	104.451	0	30	22	26	22	22	109.4	78.05	30	26	22	65	0	1.302	0.774	1.466	0.644	0.38	-0.37	0.55	-0.63	0.872031	0.884357	0.634568	0.881163	1	1	1	1	129.2	76.8	145.5	64	99.3	0.63	1.75	7.44	45.93	4.99	127.3	126.2	76.3
FALSE	High	IsMasterProtein	P43638	MHP1	D6VWE2; P43638; sce:YJL042W	MAP-homologous protein 1 [OS=Saccharomyces cerevisiae S288C]	174.491	0	28	34	42	34	34	155.1	118.7	28	42	34	53	0	1.635	0.875	1.957	0.911	0.71	-0.19	0.97	-0.13	0.0367878	0.867202	0.00722021	0.939785	0.216501	1	0.116542	1	132.5	70.9	158.6	73.9	81.1	17.51	4.02	4.98	5.9	8.86	152.7	119	70.1
FALSE	High	IsMasterProtein	Q99383	HRP1	D6W1U5; Q02741; Q99383; sce:YOL123W	Nuclear polyadenylated RNA-binding protein 4 [OS=Saccharomyces cerevisiae S288C]	34.297	0	14	5	6	5	5	59.6	24.07	14	6	5	87	0	0.481	0.418	0.66	0.667	-1.06	-1.26	-0.6	-0.59	0.707797	0.563741	0.955273	0.478394	1	1	1	1	78.9	68.6	108.3	109.3	164	5.24	8.03	13.58	64.21	7.86	79.5	85.7	67.8
FALSE	High	None	P0C0V8	RPS21A	D6VXB8; P05760; P0C0V8; sce:YKR057W	40S ribosomal protein S21-A [OS=Saccharomyces cerevisiae S288C]	14.953	0	38	5	6	0	5	9.7	10.31	38	6	5	77	0	0.828	0.799	0.795	0.982	-0.27	-0.32	-0.33	-0.03	0.825619	0.711969	0.695181	0.994014	1	1	1	1	91.5	88.2	87.8	108.5	110.5	16.11	22.41	12.76	17.31	1.97	81.7	102.7	103.6
FALSE	High	IsMasterProtein	P53628	SNF12	D6W1J8; P53628; sce:YNR023W	Transcription regulatory protein SNF12 [OS=Saccharomyces cerevisiae S288C]	4.174	3	2	1	1	1	1	63.8	3.7	2	1	1	94	0
FALSE	High	IsMasterProtein	P19414	ACO1	D6VYU7; P19414; sce:YLR304C	Aconitate hydratase, mitochondrial [OS=Saccharomyces cerevisiae S288C]	38.215	0	14	14	15	14	14	85.3	33.89	14	15	14	60	0	2.542	3.163	1.861	2.308	1.35	1.66	0.9	1.21	0.0403467	0.0140058	0.203048	0.0225227	0.226138	0.174625	0.640941	0.151337	121.8	151.6	89.2	110.6	47.9	17.09	0.89	2.39	38.13	14.73	101.9	129.9	144
FALSE	High	IsMasterProtein	P53090	ARO8	D6VTV2; P53090; sce:YGL202W	Aromatic/aminoadipate aminotransferase 1 [OS=Saccharomyces cerevisiae S288C]	66.751	0	24	10	12	10	10	56.1	44.2	24	12	10	80	0	0.804	0.569	0.883	0.769	-0.31	-0.81	-0.18	-0.38	0.999572	0.967135	0.999973	0.69445	1	1	1	1	94.5	66.8	103.8	90.4	117.5	10.4	6.98	10.26	76.03	9.19	93.3	108.2	74.6
FALSE	High	IsMasterProtein	P39929	SNF7	D6VY27; E9P8V6; P39929; sce:YLR025W	Vacuolar-sorting protein SNF7 [OS=Saccharomyces cerevisiae S288C]	17.481	0	19	3	4	3	3	27	18.35	19	4	3	130	0	0.644	0.245	0.517	0.367	-0.63	-2.03	-0.95	-1.45	0.865896	0.0686652	0.592536	0.069454	1	0.374345	1	0.311729	117	44.5	93.8	66.6	181.6	0.56	5.29	4.41	52	30.34	120.8	121.7	47.9
FALSE	High	IsMasterProtein	P61830	HHT1; HHT2	D6VQ11; E9PAG1; P02303; P13996; P61830; Q6B1U3; Q6Q7G9; sce:YBR010W; sce:YNL031C	Histone H3 [OS=Saccharomyces cerevisiae S288C]	34.216	0	40	4	10	4	4	15.3	38.86	40	10	4	144	0	0.43	1.723	0.891	0.502	-1.22	0.78	-0.17	-1	0.109329	0.410655	0.997245	0.0820892	0.382986	1	1	0.340507	45.3	181.4	93.8	52.8	105.3	22.25	3.68	34.99	28.34	34.81	55.2	40.2	183.7
FALSE	High	None	P0C2J2	TY2A-GR1	P0C2J2	Transposon Ty2-GR1 Gag polyprotein [OS=Saccharomyces cerevisiae S288C]	17.136	0	15	5	6	0	5	49.7	16.45	15	6	5	11	0	2.392	1.145	2.81	3.232	1.26	0.2	1.49	1.69	0.0956673	0.994179	0.0460419	0.0123355	0.355734	1	0.276497	0.107375	123.9	59.3	145.6	167.4	51.8	10.35	8.48	17.49	46.9	2.08	120.5	104.1	50.5
FALSE	High	IsMasterProtein	P47037	SMC3	D6VWA9; P47037; sce:YJL074C	Structural maintenance of chromosomes protein 3 [OS=Saccharomyces cerevisiae S288C]	6.878	0	3	2	2	2	2	141.3	6.87	3	2	2	125	0	0.445	0.587	0.509	0.578	-1.17	-0.77	-0.97	-0.79	0.381332	0.737956	0.544121	0.935502	0.82983	1	1	1	66	87.2	75.5	85.8	148.4	25.54	14.71	10.43	64.57	25.88	50.5	72.8	88.8
FALSE	High	IsMasterProtein	P53327	SLH1	D6VV48; P53327; sce:YGR271W	RQC trigger complex helicase SLH1 [OS=Saccharomyces cerevisiae S288C]	10.465	0	2	2	2	2	2	224.7	6.64	2	2	2	121	0	0.206	0.374	0.314	0.287	-2.28	-1.42	-1.67	-1.8	0.0105431	0.0859969	0.0442908	0.0319836	0.101483	0.436834	0.276497	0.181926	44.6	80.8	67.8	62	216.2	7.1	17.78	9.27	38.72	12.48	49.8	45	97.3
FALSE	High	IsMasterProtein	P39955	SAP1	D3DLU8; P39955; sce:YER047C	Protein SAP1 [OS=Saccharomyces cerevisiae S288C]	8.375	0	3	2	2	2	2	100.3	6.81	3	2	2	28	0	1.421	0.723	1.51	2.255	0.51	-0.47	0.59	1.17	0.412168	0.483334	0.278259	0.00512073	0.856456	1	0.7993	0.0743335	105.9	53.9	112.5	168	74.5	0.01	7.75	10.1	28.79	21.06	95.1	95.1	51.1
FALSE	High	IsMasterProtein	Q03161		D6VZS2; Q03161; sce:YMR099C	Glucose-6-phosphate 1-epimerase [OS=Saccharomyces cerevisiae S288C]	125.873	0	56	16	32	16	16	33.9	99.38	56	32	16	17	0	1.396	0.542	1.097	0.475	0.48	-0.88	0.13	-1.07	0.500634	0.0823013	0.994082	0.0103809	0.947658	0.421794	1	0.107375	152.6	59.2	119.9	51.9	109.3	9.45	3.66	1.37	28.92	3.63	149.4	170.8	63.6
FALSE	High	IsMasterProtein	P38121	POL12	D6VPW4; P38121; sce:YBL035C	DNA polymerase alpha subunit B [OS=Saccharomyces cerevisiae S288C]	2.773	4	3	1	1	1	1	78.7	2.16	3	1	1	83	0
FALSE	High	IsMasterProtein	P32327	PYC2	D6VQL4; P32327; sce:YBR218C	Pyruvate carboxylase 2 [OS=Saccharomyces cerevisiae S288C]	975.459	0	66	82	911	37	37	130.1	2777.07	66	911	82	57	51	0.31	1.225	0.487	0.39	-1.69	0.29	-1.04	-1.36	0.0022944	0.838591	0.033203	0.00715296	0.050261	1	0.261437	0.0913195	42.7	168.8	67.1	53.8	137.7	26.6	19.37	3.48	22.22	0.92	36.1	52.8	150.3
FALSE	Medium	IsMasterProtein	P36027	MID2	D6VYX3; P36027; P41944; sce:YLR332W	Cell wall integrity sensor MID2 [OS=Saccharomyces cerevisiae S288C]	1.595	36	2	1	1	1	1	39.1	0	2	1	1	55	0
FALSE	Medium	IsMasterProtein	P39524	DRS2	D6VPJ2; P39524; sce:YAL026C	Probable phospholipid-transporting ATPase DRS2 [OS=Saccharomyces cerevisiae S288C]	1.346	52	0	1	1	1	1	153.7	1.97	0	1	1	112	0
FALSE	Medium	IsMasterProtein	P53096	HOS2	D6VTW0; P53096; sce:YGL194C	Probable histone deacetylase HOS2 [OS=Saccharomyces cerevisiae S288C]	1.604	36	4	1	1	1	1	51.4	0	4	1	1	124	0
FALSE	High	IsMasterProtein	Q12078	SMF3	D6VY36; Q12078; sce:YLR034C	Iron transporter SMF3 [OS=Saccharomyces cerevisiae S288C]	2.549	5	4	1	1	1	1	51.7	3.08	4	1	1	82	0	0.353	0.615	0.657	0.662	-1.5	-0.7	-0.61	-0.59	0.380061	0.9107	0.947919	0.99989	0.828633	1	1	1	52.6	91.7	97.9	98.7	149	18.89	2.02	22.81	90.15	33.23	38.8	50.7	76.2
FALSE	High	IsMasterProtein	Q01519	COX12	D6VY41; Q01519; Q9URA6; sce:YLR038C	Cytochrome c oxidase subunit 12, mitochondrial [OS=Saccharomyces cerevisiae S288C]	3.999	3	16	1	1	1	1	9.8	3.23	16	1	1	75	0
FALSE	High	IsMasterProtein	P22138	RPA135	D6W421; P22138; sce:YPR010C	DNA-directed RNA polymerase I subunit RPA135 [OS=Saccharomyces cerevisiae S288C]	52.524	0	14	14	15	14	14	135.7	44.53	14	15	14	98	0	0.677	0.781	0.748	0.944	-0.56	-0.36	-0.42	-0.08	0.605592	0.891597	0.816992	0.998465	1	1	1	1	66.4	76.5	73.3	92.5	98	10.91	10.07	17.47	42.2	14.6	68.7	58.9	78.8
FALSE	Medium	IsMasterProtein	P03871	REP1	P03871; Q04137; Q07007	Partitioning protein REP1 [OS=Saccharomyces cerevisiae S288C]	1.507	44	2	1	1	1	1	43.2	1.68	2	1	1	23	0	0.399	0.92	0.414	0.59	-1.33	-0.12	-1.27	-0.76	0.786271	0.999995	0.811023	0.999868	1	1	1	1	59.9	138.2	62.2	88.7	150.3	43.61	40.01	18.85	113.36	7.42	63.8	33.7	80
FALSE	High	IsMasterProtein	P0CX35	RPS4A	D3DLF2; P05753; P0CX35; sce:YHR203C; sce:YJR145C	40S ribosomal protein S4-A [OS=Saccharomyces cerevisiae S288C]	32.948	0	33	9	9	9	9	29.4	23.62	33	9	9	56	0	0.922	2.701	1.1	1.55	-0.12	1.43	0.14	0.63	0.999796	0.123302	0.999558	0.636333	1	0.548884	1	1	64.5	189.1	77	108.5	70	4.67	38.64	2.07	40.47	3.55	63.6	59.5	238.6
FALSE	High	IsMasterProtein	Q03690	CLU1	D6VZI6; Q03690; sce:YMR012W	Clustered mitochondria protein 1 [OS=Saccharomyces cerevisiae S288C]	240.129	0	40	43	64	43	43	145.1	216.12	40	64	43	20	0	2.03	0.968	2.044	0.956	1.02	-0.05	1.03	-0.06	0.000128227	0.994869	0.000120266	0.986368	0.0113333	1	0.0255563	1	137.9	65.7	138.8	65	67.9	3.2	4.64	3.78	10.68	0.25	138.2	144.6	69.7
FALSE	High	IsMasterProtein	P53265		D6VUP4; P53265; sce:YGR111W	Uncharacterized protein YGR111W [OS=Saccharomyces cerevisiae S288C]	4.154	3	4	1	1	1	1	46.6	3.95	4	1	1	0	0
FALSE	High	IsMasterProtein	P38856	YAP1801	D3DLB0; P38856; sce:YHR161C	Clathrin coat assembly protein AP180A [OS=Saccharomyces cerevisiae S288C]	3.329	3	3	1	1	1	1	71.6	2.39	3	1	1	55	0
FALSE	High	IsMasterProtein	P22204	DBF2	D6VUM4; P22204; sce:YGR092W	Cell cycle protein kinase DBF2 [OS=Saccharomyces cerevisiae S288C]	134.122	0	38	21	35	13	13	66.1	112.71	38	35	21	116	6	3.583	0.552	2.095	1.223	1.84	-0.86	1.07	0.29	0.0996978	0.675701	0.485936	0.999858	0.364818	1	1	1	216.4	33.3	126.5	73.9	60.4	1.37	1.11	10.82	55.84	21.84	223.3	227.6	35
FALSE	High	IsMasterProteinCandidate	Q12273	TY1B-OL	D6W1W3; Q12273; sce:YOL103W-B	Transposon Ty1-OL Gag-Pol polyprotein [OS=Saccharomyces cerevisiae S288C]	86.433	0	13	18	23	0	3	198.5	72.17	13	23	18	97	0	1.376	1.132	1.33	3.49	0.46	0.18	0.41	1.8	0.410533	0.960556	0.511023	0.000465365	0.856085	1	1	0.0173549	84.4	69.5	81.6	214.1	61.4	9.7	10.13	2.93	22.23	14.12	82.4	71.8	68
FALSE	High	IsMasterProtein	P40052		D3DLY6; P40052; sce:YER079W	Uncharacterized protein YER079W [OS=Saccharomyces cerevisiae S288C]	10.123	0	13	2	2	2	2	23.2	6.57	13	2	2	0	0
FALSE	Medium	IsMasterProtein	P04161	ADE8	D6VT40; P04161; sce:YDR408C	Phosphoribosylglycinamide formyltransferase [OS=Saccharomyces cerevisiae S288C]	1.733	32	3	1	1	1	1	23.5	1.77	3	1	1	68	0
FALSE	High	IsMasterProtein	P40482	SEC24	D6VVH8; P40482; sce:YIL109C	Protein transport protein SEC24 [OS=Saccharomyces cerevisiae S288C]	7.93	0	4	3	3	3	3	103.6	6.71	4	3	3	113	0	0.528	1.322	0.826	0.761	-0.92	0.4	-0.28	-0.39	0.995201	0.999908	0.999986	0.766177	1	1	1	1	59.8	149.5	93.4	86.1	113.1	7.14	4.82	24.39	85.88	28.45	60.2	66.6	153.1
FALSE	High	IsMasterProtein	P12709	PGI1	D6VQJ0; P12709; sce:YBR196C	Glucose-6-phosphate isomerase [OS=Saccharomyces cerevisiae S288C]	12.473	0	5	2	2	2	2	61.3	9.29	5	2	2	84	0	0.812	0.825	0.829	0.507	-0.3	-0.28	-0.27	-0.98	0.914022	0.93568	0.942553	0.077149	1	1	1	0.329544	94.3	95.8	96.3	58.9	116.1	10.7	16.75	37.56	23.58	15.17	89.2	103.8	86.8
FALSE	High	IsMasterProtein	Q12451	OSH2	D6VRX1; P89891; Q12451; sce:YDL019C	Oxysterol-binding protein homolog 2 [OS=Saccharomyces cerevisiae S288C]	9.178	0	3	2	2	2	2	145.7	8.44	3	2	2	85	0	0.29	0.513	0.355	0.391	-1.78	-0.96	-1.49	-1.36	0.0206658	0.254594	0.0489366	0.0592688	0.151242	0.862165	0.289836	0.276829	52.6	93	64.4	70.8	181.3	2.69	0.67	4.02	47.05	1.17	51.6	53.6	92.6
FALSE	High	IsMasterProtein	P42846	KRI1	D6W0N7; P42846; sce:YNL308C	Protein KRI1 [OS=Saccharomyces cerevisiae S288C]	16.778	0	10	4	5	4	4	68.6	14.85	10	5	4	58	0	0.425	0.388	0.447	0.394	-1.23	-1.36	-1.16	-1.34	0.00326716	0.00179186	0.00464772	0.000731449	0.0552424	0.0805374	0.0905125	0.0192913	82.8	75.7	87.1	76.8	194.9	3.71	4.26	0.79	19.41	18.83	87.1	82.7	75.3
FALSE	High	IsMasterProtein	Q00684	CDC14	D6VTQ8; Q00684; Q05180; Q05673; sce:YFR028C	Tyrosine-protein phosphatase CDC14 [OS=Saccharomyces cerevisiae S288C]	12.405	0	5	3	3	3	3	61.9	7.99	5	3	3	174	0	0.519	0.684	0.549	0.673	-0.95	-0.55	-0.86	-0.57	0.0756533	0.39932	0.106876	0.366684	0.331777	1	0.43351	0.855463	77.9	102.6	82.4	101.1	150.1	27.17	27.34	0.19	20.91	5.63	101.7	68.9	134.2
FALSE	High	IsMasterProtein	P40354	NTA1	D6VWN3; P40354; sce:YJR062C	Protein N-terminal amidase [OS=Saccharomyces cerevisiae S288C]	5.525	1	5	1	1	1	1	51.9	3.9	5	1	1	25	0	0.502	0.704	0.621	0.681	-0.99	-0.51	-0.69	-0.55	0.304334	0.837934	0.627421	0.927161	0.716558	1	1	1	67.8	95	83.8	91.9	134.9	14.4	13.54	3.9	51.94	16.83	58.2	71.4	82.2
FALSE	Medium	None	P36093	PHD1	D6VXP3; P36093; Q2VQ88; sce:YKL043W	Putative transcription factor PHD1 [OS=Saccharomyces cerevisiae S288C]	1.5	45	2	1	1	0	1	40.6	0	2	1	1	87	0
FALSE	High	IsMasterProtein	P32644	ECM32	D3DM85; P32644; sce:YER176W	Putative ATP-dependent RNA helicase ECM32 [OS=Saccharomyces cerevisiae S288C]	3.073	3	1	1	1	1	1	126.9	2.33	1	1	1	115	0	0.832	1.012	1.039	1.873	-0.26	0.02	0.06	0.9	0.999783	1	1	0.561709	1	1	1	1	72	87.6	89.9	162.1	86.6	45.51	0.41	29.15	119.11	39.46	58.4	30	51
FALSE	Low	IsMasterProtein	Q04598		D6VSA0; Q04598; sce:YDR115W	54S ribosomal protein L34, mitochondrial [OS=Saccharomyces cerevisiae S288C]	1.133	70	6	1	1	1	1	12	2.48	6	1	1	64	0	1.02	1.537	1.207	2.498	0.03	0.62	0.27	1.32	1	0.927505	0.997928	0.158369	1	1	1	0.530515	75.6	113.9	89.5	185.1	74.1	28.6	2.57	15.58	86.61	12.7	67.9	45	84.8
FALSE	High	IsMasterProtein	P37370	VRP1	D6VYX7; P37370; Q06133; sce:YLR337C	Verprolin [OS=Saccharomyces cerevisiae S288C]	22.962	0	9	6	6	6	6	82.5	17.08	9	6	6	77	0	3.302	1.833	3.088	1.759	1.72	0.87	1.63	0.81	0.577814	0.946389	0.62739	0.955871	1	1	1	1	170.2	94.5	159.2	90.7	51.5	12.38	3.89	36.77	104.62	22.96	166.3	139.5	82.3
FALSE	High	None	Q12392	TY2A-DR1	D6VS20; P87338; Q12392; Q7LIH4; sce:YDR034C-C	Transposon Ty2-DR1 Gag polyprotein [OS=Saccharomyces cerevisiae S288C]	17.136	0	15	5	6	0	5	49.7	16.45	15	6	5	21	0	2.392	1.145	2.81	3.232	1.26	0.2	1.49	1.69	0.0956673	0.994179	0.0460419	0.0123355	0.355734	1	0.276497	0.107375	123.9	59.3	145.6	167.4	51.8	10.35	8.48	17.49	46.9	2.08	120.5	104.1	50.5
FALSE	Low	IsMasterProtein	P42937	YCH1	D6VUY5; P42937; sce:YGR203W	CDC25-like phosphatase YCH1 [OS=Saccharomyces cerevisiae S288C]	1.083	74	5	1	1	1	1	17.2	1.64	5	1	1	21	0
FALSE	High	IsMasterProtein	P38687	SRP68	D6W3C8; P38687; sce:YPL243W	Signal recognition particle subunit SRP68 [OS=Saccharomyces cerevisiae S288C]	7.976	0	4	2	3	2	2	69	6.64	4	3	2	70	0	0.652	0.655	0.843	1.002	-0.62	-0.61	-0.25	0	0.804819	0.810574	0.994673	0.923264	1	1	1	1	74.1	74.4	95.7	113.7	113.6	17.79	17.76	27.11	59.5	11.41	56.8	73.2	73.5
FALSE	High	IsMasterProtein	P27637	BUD14	D6VPM3; P27637; sce:YAR014C	Bud site selection protein 14 [OS=Saccharomyces cerevisiae S288C]	14.819	0	2	1	2	1	1	78.9	9.46	2	2	1	131	0	0.528	0.418	0.731	0.647	-0.92	-1.26	-0.45	-0.63	0.970204	0.90256	0.998795	0.635814	1	1	1	1	76.1	60.4	105.5	93.4	144.3	14.56	1.74	2.31	80.5	13.08	72.2	88.8	62.7
FALSE	High	IsMasterProteinCandidate	Q12337	TY2B-GR1	Q12337	Transposon Ty2-GR1 Gag-Pol polyprotein [OS=Saccharomyces cerevisiae S288C]	23.005	0	5	6	7	0	5	202	20.97	5	7	6	95	0	2.392	1.145	2.81	3.232	1.26	0.2	1.49	1.69	0.0956673	0.994179	0.0460419	0.0123355	0.355734	1	0.276497	0.107375	123.9	59.3	145.6	167.4	51.8	10.35	8.48	17.49	46.9	2.08	120.5	104.1	50.5
FALSE	High	IsMasterProtein	P01120	RAS2	D6W181; P01120; Q45U01; sce:YNL098C	Ras-like protein 2 [OS=Saccharomyces cerevisiae S288C]	5.341	1	4	1	1	1	1	34.7	3.8	4	1	1	186	0	0.211	0.31	0.226	0.489	-2.25	-1.69	-2.15	-1.03	0.164464	0.375024	0.192119	0.837345	0.487127	1	0.625339	1	45.1	66.5	48.4	104.8	214.3	21.7	8.51	18.23	91.37	14.94	46	33.8	54.7
FALSE	High	IsMasterProtein	P31374	PSK1	D6VPK1; P31374; sce:YAL017W	Serine/threonine-protein kinase PSK1 [OS=Saccharomyces cerevisiae S288C]	10.181	0	3	2	3	2	2	152.2	9.34	3	3	2	101	0	0.704	1.035	0.883	0.704	-0.51	0.05	-0.18	-0.51	0.930991	0.999999	0.999296	0.606404	1	1	1	1	77	113.1	96.6	77	109.3	14.13	25.92	17.86	50.03	40.29	71.4	87.2	139.6
FALSE	High	IsMasterProtein	P41921	GLR1	D6W3S6; P41921; sce:YPL091W	Glutathione reductase [OS=Saccharomyces cerevisiae S288C]	13.767	0	7	3	3	3	3	53.4	10.03	7	3	3	75	0	1.199	0.428	1.058	0.663	0.26	-1.22	0.08	-0.59	0.999397	0.693531	0.999998	0.482322	1	1	1	1	135.5	48.4	119.6	75	113	6.36	2.32	7.31	68.16	6.89	138	151	50.7
FALSE	High	IsMasterProtein	Q02875	SYH1	D6W3R2; Q02875; sce:YPL105C	SMY2 homolog 2 [OS=Saccharomyces cerevisiae S288C]	267.724	0	54	37	68	37	37	94.3	248.44	54	68	37	19	0	1.738	1.061	2.834	5.317	0.8	0.09	1.5	2.41	0.0370754	0.997111	0.00107332	3.61914e-05	0.216501	1	0.0455965	0.00752475	65	39.7	106.1	199	37.4	3.17	1.8	2.87	23.89	2.82	60.2	63	38.1
FALSE	High	IsMasterProteinCandidate	P29311	BMH1	D3DM86; P29311; Q06854; sce:YER177W	Protein BMH1 [OS=Saccharomyces cerevisiae S288C]	16.326	0	14	3	4	0	3	30.1	11.68	14	4	3	193	0	0.578	0.611	0.668	1.047	-0.79	-0.71	-0.58	0.07	0.991526	0.99479	0.997942	0.879401	1	1	1	1	76.2	80.6	88.1	138.2	131.9	4.99	5.53	1.93	81.58	12.05	78	83.6	82.1
FALSE	High	IsMasterProtein	P18480	SNF5	D6VQT4; P18480; sce:YBR289W	SWI/SNF chromatin-remodeling complex subunit SNF5 [OS=Saccharomyces cerevisiae S288C]	3.978	3	1	1	1	1	1	102.5	2.79	1	1	1	153	0
FALSE	High	IsMasterProtein	P50109	PSP2	D6VZF7; P50109; Q07170; Q870H3; sce:YML017W	Protein PSP2 [OS=Saccharomyces cerevisiae S288C]	41.398	0	15	8	10	8	8	65.5	30.39	15	10	8	50	0	3.211	0.934	1.857	1.503	1.68	-0.1	0.89	0.59	0.000332369	0.99226	0.0145611	0.121596	0.0217506	1	0.16178	0.443537	199.4	58	115.3	93.3	62.1	10.8	1.58	10.05	16.38	0.24	186.9	217.8	58
FALSE	High	IsMasterProtein	Q12100	RTK1	D6VRW6; Q12100; sce:YDL025C	Probable serine/threonine-protein kinase RTK1 [OS=Saccharomyces cerevisiae S288C]	3.549	3	2	1	1	1	1	69.6	2.71	2	1	1	58	0	0.507	0.899	0.571	0.579	-0.98	-0.15	-0.81	-0.79	0.0634642	0.988054	0.130641	0.142488	0.292853	1	0.492152	0.49313	61.9	109.8	69.7	70.7	122.1	16.2	2.25	3.65	17.66	35.77	59.3	74.6	119.8
FALSE	High	IsMasterProtein	P38353	SSH1	D6VQS8; P38353; sce:YBR283C	Sec sixty-one protein homolog [OS=Saccharomyces cerevisiae S288C]	13.393	0	6	2	2	2	2	53.3	8.86	6	2	2	76	0	0.715	1.869	1.28	1.755	-0.48	0.9	0.36	0.81	0.947097	0.628532	0.984913	0.323168	1	1	1	0.795074	54.3	141.9	97.2	133.2	75.9	11.48	39.03	17.17	69.09	12.71	49.7	42.2	158.9
FALSE	High	IsMasterProtein	P38791	DYS1	D3DL17; P38791; sce:YHR068W	Deoxyhypusine synthase [OS=Saccharomyces cerevisiae S288C]	9.827	0	11	3	3	3	3	42.9	9.35	11	3	3	22	0	0.741	0.611	0.709	0.609	-0.43	-0.71	-0.5	-0.71	0.639177	0.220929	0.52133	0.165086	1	0.792584	1	0.547276	95.5	78.8	91.4	78.6	128.9	17.72	4.76	5.99	26.09	27.15	84.7	109	82
FALSE	High	IsMasterProtein	P53935	NST1	D6W189; P53935; Q45TZ3; sce:YNL091W	Stress response protein NST1 [OS=Saccharomyces cerevisiae S288C]	187.16	0	32	33	48	31	32	141.4	146.33	32	48	33	7	1	1.625	0.872	2.432	5.478	0.7	-0.2	1.28	2.45	0.253917	0.977381	0.0218449	0.000516457	0.635622	1	0.199205	0.0173725	73.1	39.2	109.4	246.4	45	2.93	8.28	4.61	32.22	0.71	68.1	71	39.6
FALSE	Medium	None	P34247	UTP11	D6VXI8; P34247; sce:YKL099C	U3 small nucleolar RNA-associated protein 11 [OS=Saccharomyces cerevisiae S288C]	1.275	61	2	1	1	0	1	29.7	0	2	1	1	80	0
FALSE	High	IsMasterProteinCandidate	Q03612	TY1B-ER1	D3DM43; Q03612; sce:YER138C	Transposon Ty1-ER1 Gag-Pol polyprotein [OS=Saccharomyces cerevisiae S288C]	86.433	0	13	18	23	0	3	198.4	72.17	13	23	18	97	0	1.376	1.132	1.33	3.49	0.46	0.18	0.41	1.8	0.410533	0.960556	0.511023	0.000465365	0.856085	1	1	0.0173549	84.4	69.5	81.6	214.1	61.4	9.7	10.13	2.93	22.23	14.12	82.4	71.8	68
FALSE	High	IsMasterProtein	P53598	LSC1	D6W2J8; P53598; sce:YOR142W	Succinate--CoA ligase [ADP-forming] subunit alpha, mitochondrial [OS=Saccharomyces cerevisiae S288C]	6.745	0	7	1	1	1	1	35	3.9	7	1	1	99	0
FALSE	High	None	Q03246	MRPS17	D6W012; Q02523; Q03246; sce:YMR188C	37S ribosomal protein S17, mitochondrial [OS=Saccharomyces cerevisiae S288C]	2.321	5	3	1	1	0	1	27.6	2.04	3	1	1	78	0	1.247	0.77	1.441	1.549	0.32	-0.38	0.53	0.63	0.998356	0.996385	0.983818	0.775455	1	1	1	1	111.7	68.9	129	138.7	89.5	28.13	8.93	56.69	86.19	61.06	107.8	72	51.1
FALSE	Low	IsMasterProtein	P12887	UNG1	D6VZF3; E9P912; P12887; sce:YML021C	Uracil-DNA glycosylase [OS=Saccharomyces cerevisiae S288C]	1.042	76	3	1	1	1	1	40.4	2.3	3	1	1	46	0
FALSE	High	IsMasterProtein	P38720	GND1	D3DLD1; P38720; sce:YHR183W	6-phosphogluconate dehydrogenase, decarboxylating 1 [OS=Saccharomyces cerevisiae S288C]	32.299	0	22	8	10	8	8	53.5	34.52	22	10	8	78	0	2.08	2.364	2.111	2.419	1.06	1.24	1.08	1.27	0.032705	0.0143906	0.0296314	0.011103	0.199883	0.174625	0.244751	0.107375	110.4	125.5	112	128.4	53.1	15.25	9.71	12.32	18.1	7.55	97.8	121.4	115.6
FALSE	High	None	Q92393	TY1B-OR	D6W2J9; Q92393; sce:YOR142W-B	Transposon Ty1-OR Gag-Pol polyprotein [OS=Saccharomyces cerevisiae S288C]	71.139	0	10	15	20	0	2	198.4	61.16	10	20	15	97	0	0.823	0.794	0.464	3.415	-0.28	-0.33	-1.11	1.77	0.999906	0.999786	0.949347	0.999119	1	1	1	1	61	58.8	34.4	253.1	74.1	15.42	4.46	39.15	79.75	7.12	71.9	57.8	60.3
FALSE	High	IsMasterProtein	Q02753	RPL21A	D6VQI5; Q02753; sce:YBR191W	60S ribosomal protein L21-A [OS=Saccharomyces cerevisiae S288C]	32.012	0	30	4	8	0	4	18.2	24.68	30	8	4	46	0	0.445	1.66	0.623	0.707	-1.17	0.73	-0.68	-0.5	0.320585	0.72136	0.769056	0.941834	0.735235	1	1	1	50.1	187.1	70.2	79.7	112.7	8.46	23.06	2.55	55.85	32.53	51.7	45.8	214
FALSE	High	IsMasterProtein	P21965	MCK1	D6W0N8; P21965; sce:YNL307C	Protein kinase MCK1 [OS=Saccharomyces cerevisiae S288C]	3.739	3	3	1	1	1	1	43.1	2.16	3	1	1	123	0	5.363	7.049	8.591	11.329	2.42	2.82	3.1	3.5									89.9	118.2	144	190	16.8	4.28	16.63	20.47	59.02		69.3	73.6	105.6
FALSE	High	IsMasterProtein	P54005	DIA1	D6W0E4; P54005; sce:YMR316W	Protein DIA1 [OS=Saccharomyces cerevisiae S288C]	2.71	4	2	1	1	1	1	38.7	0	2	1	1	10	0
FALSE	High	IsMasterProtein	P17255	VMA1	D6VRG7; O74301; P17255; Q9Y7W5; sce:YDL185W	V-type proton ATPase catalytic subunit A [OS=Saccharomyces cerevisiae S288C]	198.792	0	44	39	47	39	39	118.6	161.61	44	47	39	195	0	0.92	0.715	0.836	0.785	-0.12	-0.48	-0.26	-0.35	0.993896	0.403389	0.868133	0.20079	1	1	1	0.609906	104	80.9	94.5	88.8	113	3.74	0.99	3.93	25.57	2.54	110.3	104.6	84.2
FALSE	High	IsMasterProtein	P43603	LSB3	D6VTQ4; P43603; sce:YFR024C-A	LAS seventeen-binding protein 3 [OS=Saccharomyces cerevisiae S288C]	11.635	0	7	3	4	1	3	49.3	10.29	7	4	3	46	0	6.561	8.679	7.707	8.696	2.71	3.12	2.95	3.12	0.0278947	0.0145495	0.0190671	0.0144867	0.181079	0.174625	0.185447	0.114916	107.7	142.5	126.5	142.8	16.4	21.74	35.82	19.46	22.1	71.53	133.2	97.7	195.4
FALSE	High	IsMasterProtein	P42843	SKP2	D6W0N4; P42843; Q6B2L9; sce:YNL311C	F-box protein SKP2 [OS=Saccharomyces cerevisiae S288C]	14.965	0	5	4	4	4	4	88.9	10.93	5	4	4	42	0	1.564	0.91	1.891	1.936	0.65	-0.14	0.92	0.95	0.705796	0.999468	0.401145	0.102658	1	1	1	0.397938	115.4	67.1	139.5	142.8	73.8	17.17	10.65	9.21	57.48	22.64	111.1	87.1	53.1
FALSE	High	IsMasterProtein	P47029	ALY2	D6VW99; P47029; Q05742; sce:YJL084C	Arrestin-related trafficking adapter 3 [OS=Saccharomyces cerevisiae S288C]	29.94	0	8	7	8	7	7	117.1	22.89	8	8	7	67	0	0.677	0.517	0.773	0.713	-0.56	-0.95	-0.37	-0.49	0.78242	0.348369	0.947438	0.967588	1	1	1	1	94.8	72.4	108.3	99.9	140	2.21	4.12	9.25	56.68	9.02	90.7	87.9	66.2
FALSE	High	IsMasterProtein	Q01662	MAP1	D6VYP2; Q01662; sce:YLR244C	Methionine aminopeptidase 1 [OS=Saccharomyces cerevisiae S288C]	6.985	0	5	2	2	2	2	43.3	5.83	5	2	2	57	0	0.636	1.07	0.625	0.723	-0.65	0.1	-0.68	-0.47	0.616848	0.999832	0.585163	0.999391	1	1	1	1	77	129.5	75.7	87.5	121	9.12	11.22	23.59	45.99	8.43	76.7	67.4	111.7
FALSE	High	IsMasterProtein	P34223	SHP1	D6VPU2; E9P8S9; P34223; sce:YBL058W	UBX domain-containing protein 1 [OS=Saccharomyces cerevisiae S288C]	23.125	0	13	5	5	5	5	47	14.49	13	5	5	114	0	0.829	0.709	1.403	0.666	-0.27	-0.5	0.49	-0.59	0.995901	0.943932	0.947663	0.386768	1	1	1	0.878253	90.5	77.3	153.1	72.7	109.1	4.62	0.72	19.95	53.62	12.83	98.2	92	81.6
FALSE	High	IsMasterProtein	P30771	NAM7	D6VZQ4; P30771; sce:YMR080C	ATP-dependent helicase NAM7 [OS=Saccharomyces cerevisiae S288C]	164.496	0	37	31	39	31	31	109.4	126.87	37	39	31	143	0	1.185	0.78	1.399	3.12	0.25	-0.36	0.48	1.64	0.983617	0.925266	0.794618	0.0498823	1	1	1	0.247456	84.6	55.7	99.9	222.7	71.4	3.19	1.69	1.65	40.75	15.52	80.8	84.5	55
FALSE	High	IsMasterProtein	P0CX54	RPL12B	D3DLJ6; P05741; P0CX54; P17079; sce:YDR418W; sce:YEL054C	60S ribosomal protein L12-B [OS=Saccharomyces cerevisiae S288C]	35.991	0	50	7	9	7	7	17.8	27.89	50	9	7	70	0	1.554	4.138	1.563	1.983	0.64	2.05	0.64	0.99	0.78011	0.0317767	0.771801	0.185482	1	0.248161	1	0.591998	79.4	211.3	79.8	101.3	51.1	15.76	18.38	0.47	53.6	11.99	65.9	82.4	223.5
FALSE	High	None	Q12391	TY1A-NL1	D6W0Q9; Q12391; sce:YNL284C-A	Transposon Ty1-NL1 Gag polyprotein [OS=Saccharomyces cerevisiae S288C]	11.647	0	6	3	4	0	1	49.3	8.18	6	4	3	21	0	0.823	0.794	0.464	3.415	-0.28	-0.33	-1.11	1.77	0.999906	0.999786	0.949347	0.999119	1	1	1	1	61	58.8	34.4	253.1	74.1	15.42	4.46	39.15	79.75	7.12	71.9	57.8	60.3
FALSE	High	IsMasterProteinCandidate	P39004	HXT7	D6VSX3; P39004; sce:YDR342C	High-affinity hexose transporter HXT7 [OS=Saccharomyces cerevisiae S288C]	8.513	0	4	1	3	0	1	62.7	11.82	4	3	1	54	0	0.296	0.469	0.421	1.139	-1.75	-1.09	-1.25	0.19	0.148006	0.516617	0.39608	0.999911	0.458379	1	1	1	43	68.1	61.1	165.3	145.2	13.53	6.03	27.32	50.68	27.49	45.8	37.8	68.8
FALSE	High	IsMasterProtein	P36161	NUP133	D6VXE2; P36161; sce:YKR082W	Nucleoporin NUP133 [OS=Saccharomyces cerevisiae S288C]	11.938	0	4	5	5	5	5	133.2	9.45	4	5	5	170	0	0.688	0.626	0.921	0.514	-0.54	-0.68	-0.12	-0.96	0.5867	0.384502	0.99869	0.225687	1	1	1	0.653185	88.7	80.7	118.7	66.2	128.9	3.74	11.81	6.4	34.49	13.78	90.2	85.5	86.8
FALSE	High	IsMasterProtein	P46970	NMD5	D6VWV0; P46970; sce:YJR132W	Nonsense-mediated mRNA decay protein 5 [OS=Saccharomyces cerevisiae S288C]	5.947	0	4	2	3	2	2	119.9	8.54	4	3	2	47	0	0.839	0.492	0.838	0.639	-0.25	-1.02	-0.25	-0.65	0.978872	0.18079	0.978584	0.861782	1	0.69881	1	1	101.7	59.7	101.7	77.5	121.3	17.15	7.82	5.84	44.11	29.43	86.8	110.7	60.8
FALSE	Medium	IsMasterProtein	Q04437	YKU80	D6VZS9; Q04437; Q0P737; Q0P738; Q0P741; Q0P749; sce:YMR106C	ATP-dependent DNA helicase II subunit 2 [OS=Saccharomyces cerevisiae S288C]	1.625	33	1	1	2	1	1	71.2	4.59	1	2	1	143	0	1.598	3.201	1.663	0.978	0.68	1.68	0.73	-0.03	0.751947	0.0985995	0.694184	1	1	0.483728	1	1	106.7	213.7	111	65.3	66.8	34.97	48.11	22.94	38.42	28.11	143.3	86.5	156.5
FALSE	Medium	None	P38772	BCD1	D3DKY8; P38772; sce:YHR040W	Box C/D snoRNA protein 1 [OS=Saccharomyces cerevisiae S288C]	1.825	22	2	1	1	0	1	42.3	2.27	2	1	1	56	0	0.691	0.619	1.559	1.201	-0.53	-0.69	0.64	0.26	0.160689	0.0611926	0.0830504	0.702879	0.480648	0.360252	0.380072	1	68.1	61	153.5	118.3	98.5	25.83	5.27	4.25	11.49	9.32	88.4	61.1	63.4
FALSE	High	IsMasterProtein	P40343	VPS27	D6W1I1; P40343; sce:YNR006W	Vacuolar protein sorting-associated protein 27 [OS=Saccharomyces cerevisiae S288C]	11.202	0	7	4	4	4	4	70.9	9	7	4	4	139	0	2.443	1.188	2.021	1.25	1.29	0.25	1.01	0.32	0.0388034	0.964399	0.108798	0.975677	0.219631	1	0.438627	1	158.5	77	131.1	81	64.9	3.98	1.27	2.26	30.34	31.02	166.2	157.1	79.2
FALSE	High	IsMasterProtein	P0CX41	RPL23A	D3DM23; P04451; P0CX41; sce:YBL087C; sce:YER117W	60S ribosomal protein L23-A [OS=Saccharomyces cerevisiae S288C]	33.99	0	52	7	8	7	7	14.5	26.75	52	8	7	53	0	0.913	2.097	1.119	1.1	-0.13	1.07	0.16	0.14	0.995451	0.0428477	0.988271	0.992945	1	0.292793	1	1	76.8	176.3	94	92.5	84.1	2.9	16.13	1.4	14.92	5.53	75.1	78.2	197.3
FALSE	High	None	Q12193	TY1B-BR	D6VQ13; Q12193; sce:YBR012W-B	Transposon Ty1-BR Gag-Pol polyprotein [OS=Saccharomyces cerevisiae S288C]	71.139	0	10	15	20	0	2	198.7	61.16	10	20	15	97	0	0.823	0.794	0.464	3.415	-0.28	-0.33	-1.11	1.77	0.999906	0.999786	0.949347	0.999119	1	1	1	1	61	58.8	34.4	253.1	74.1	15.42	4.46	39.15	79.75	7.12	71.9	57.8	60.3
FALSE	High	IsMasterProtein	P07213	TOM70	B0KZR5; B0KZS4; B0KZU2; B0KZY7; B0KZZ6; B0L005; B0L023; D6W162; P07213; sce:YNL121C	Mitochondrial import receptor subunit TOM70 [OS=Saccharomyces cerevisiae S288C]	8.09	0	3	1	1	1	1	70.1	5.28	3	1	1	94	0	0.339	0.5	0.43	0.421	-1.56	-1	-1.22	-1.25	0.00776207	0.0602004	0.0258246	0.0227871	0.0874374	0.360252	0.221437	0.151513	58.6	86.2	74.3	72.6	172.5	11.7	4.21	3.11	8.59	19.25	57.7	68.1	95.2
FALSE	High	IsMasterProtein	P00817	IPP1	D6VQ12; P00817; sce:YBR011C	Inorganic pyrophosphatase [OS=Saccharomyces cerevisiae S288C]	14.406	0	14	2	4	2	2	32.3	16.27	14	4	2	24	0	0.64	0.729	0.866	0.649	-0.64	-0.46	-0.21	-0.62	0.271664	0.572885	0.963675	0.280461	0.665548	1	1	0.744174	76.8	87.5	103.9	77.9	120	29.47	1.65	9.27	20.67	21.13	62.3	95.1	88.8
FALSE	High	None	P0C2J6	TY2A-LR2	P0C2J6	Transposon Ty2-LR2 Gag polyprotein [OS=Saccharomyces cerevisiae S288C]	17.136	0	15	5	6	0	5	49.8	16.45	15	6	5	11	0	2.392	1.145	2.81	3.232	1.26	0.2	1.49	1.69	0.0956673	0.994179	0.0460419	0.0123355	0.355734	1	0.276497	0.107375	123.9	59.3	145.6	167.4	51.8	10.35	8.48	17.49	46.9	2.08	120.5	104.1	50.5
FALSE	High	IsMasterProtein	Q06142	KAP95	D6VYY6; Q06142; sce:YLR347C	Importin subunit beta-1 [OS=Saccharomyces cerevisiae S288C]	2.831	4	3	1	1	1	1	94.7	2.69	3	1	1	133	0	0.162	0.451	0.189	0.326	-2.62	-1.15	-2.4	-1.62	0.0376852	0.496798	0.0549633	0.22368	0.216501	1	0.312638	0.649012	32.5	90.2	37.9	65.2	200.2	51.18	2.13	23.8	54.61	17.78	23	49.1	94.9
FALSE	High	IsMasterProtein	P38688	SRP72	D6W3G0; P38688; sce:YPL210C	Signal recognition particle subunit SRP72 [OS=Saccharomyces cerevisiae S288C]	15.333	0	4	3	4	3	3	73.5	7.62	4	4	3	71	0	0.235	1.097	0.753	0.425	-2.09	0.13	-0.41	-1.23	0.00361146	0.998115	0.814797	0.113982	0.0553276	1	1	0.419762	31.3	146.4	100.5	56.7	133.5	16.49	4.9	6.11	43.17	13.82	35	27.7	150.7
FALSE	High	IsMasterProteinCandidate	O14455	RPL36B	D6W3C1; O14455; sce:YPL249C-A	60S ribosomal protein L36-B [OS=Saccharomyces cerevisiae S288C]	18.076	0	33	4	4	0	4	11.1	14.31	33	4	4	51	0	0.525	1.107	0.788	0.629	-0.93	0.15	-0.34	-0.67	0.538797	0.999661	0.982284	0.791631	0.978006	1	1	1	66.1	139.3	99.2	79.1	125.9	16.24	10.21	16.38	53.79	33.6	72.4	57.5	146.2
FALSE	High	IsMasterProteinCandidate	Q12690	RPL13A	D6VRR7; Q12690; sce:YDL082W	60S ribosomal protein L13-A [OS=Saccharomyces cerevisiae S288C]	28.76	0	31	7	8	0	7	22.5	23.86	31	8	7	51	0	0.683	1.542	0.887	1.509	-0.55	0.63	-0.17	0.59	0.863898	0.798235	0.998996	0.971097	1	1	1	1	60.9	137.6	79.1	134.6	89.2	15.76	12.8	8.76	37.07	25.18	67.6	54	149.6
FALSE	Medium	IsMasterProtein	A0A023PZF2		A0A023PZF2; A0A1S0T066	Uncharacterized protein YEL009C-A [OS=Saccharomyces cerevisiae S288C]	1.545	42	4	1	1	1	1	15.9	1.97	4	1	1	0	0
FALSE	High	IsMasterProtein	P43563	MOB2	D6VTJ5; P43563; sce:YFL034C-B	CBK1 kinase activator protein MOB2 [OS=Saccharomyces cerevisiae S288C]	4.721	1	5	1	1	1	1	33.3	2.86	5	1	1	104	0
FALSE	High	IsMasterProtein	P39966	PTC2	D3DLZ6; P39966; sce:YER089C	Protein phosphatase 2C homolog 2 [OS=Saccharomyces cerevisiae S288C]	25.98	0	15	8	8	6	8	50.4	19.24	15	8	8	82	0	2.198	0.844	2.224	1.315	1.14	-0.24	1.15	0.4	0.19826	0.989914	0.188902	1	0.552915	1	0.619692	1	152.4	58.5	154.2	91.2	69.3	1.1	8.31	14.59	42.42	17.81	160.3	157.8	57.6
FALSE	High	IsMasterProtein	P04912	HTA2	D6VPZ9; P04912; sce:YBL003C	Histone H2A.2 [OS=Saccharomyces cerevisiae S288C]	23.56	0	29	2	3	0	2	14	14.74	29	3	2	63	0	0.405	1.235	0.568	0.982	-1.31	0.3	-0.82	-0.03	0.453931	0.996558	0.820551	0.967921	0.90392	1	1	1	46	140.5	64.6	111.7	113.7	9.27	11.51	13.81	49.23	23.13	43.1	49.1	129.5
FALSE	Low	IsMasterProtein	P27929	NAM9	D6W145; P27929; sce:YNL137C	37S ribosomal protein NAM9, mitochondrial [OS=Saccharomyces cerevisiae S288C]	1.08	74	4	1	1	1	1	56.3	0	4	1	1	103	0
FALSE	High	IsMasterProtein	P25655	CDC39	D6VR93; P25655; sce:YCR093W	General negative regulator of transcription subunit 1 [OS=Saccharomyces cerevisiae S288C]	258.793	0	23	44	68	44	44	240.1	222.17	23	68	44	172	0	0.831	1.123	2.873	4.589	-0.27	0.17	1.52	2.2	0.902978	0.984893	0.00588264	0.000635916	1	1	0.109019	0.0187072	40.7	55	140.7	224.7	49	2.95	5.63	11.58	28.78	3.59	38	39.7	54.6
FALSE	High	None	Q12217	TY1A-BR	D6VQ14; Q12217; sce:YBR012W-A	Transposon Ty1-BR Gag polyprotein [OS=Saccharomyces cerevisiae S288C]	59.674	0	31	11	16	0	2	49	49.64	31	16	11	21	0	0.823	0.794	0.464	3.415	-0.28	-0.33	-1.11	1.77	0.999906	0.999786	0.949347	0.999119	1	1	1	1	61	58.8	34.4	253.1	74.1	15.42	4.46	39.15	79.75	7.12	71.9	57.8	60.3
FALSE	High	IsMasterProtein	P42942		D6VUZ3; P42942; sce:YGR210C	Uncharacterized GTP-binding protein YGR210C [OS=Saccharomyces cerevisiae S288C]	6.405	0	4	1	3	1	1	45.2	5.59	4	3	1	27	0	0.273	0.384	0.277	0.284	-1.87	-1.38	-1.85	-1.82	0.10817	0.294212	0.112462	0.0473626	0.38125	0.93821	0.443993	0.243607	54.8	77	55.5	56.8	200.4	13.12	1.08	10.68	59.5	6.95	51.4	61.9	79.8
FALSE	High	IsMasterProtein	P32386	YBT1	D6VXW0; P32386; Q07882; sce:YLL048C	ATP-dependent bile acid permease [OS=Saccharomyces cerevisiae S288C]	4.41	1	1	2	2	2	2	189	4.98	1	2	2	70	0	0.657	1.031	0.934	0.775	-0.61	0.04	-0.1	-0.37	0.939598	1	0.999987	0.999723	1	1	1	1	72.8	114.3	103.5	85.9	110.8	5.28	18.91	2.09	92.73	0.75	64.6	59.9	111.7
FALSE	High	IsMasterProtein	P0CX23	RPL20A	A1YV95; A1YV96; D6W068; P0C2I0; P0C2I1; P0CX23; P47913; sce:YMR242C; sce:YOR312C	60S ribosomal protein L20-A [OS=Saccharomyces cerevisiae S288C]	33.616	0	34	6	9	6	6	20.4	22.29	34	9	6	46	0	0.583	1.853	0.75	1.197	-0.78	0.89	-0.41	0.26	0.466808	0.349821	0.899444	0.999999	0.91218	1	1	1	56.2	178.7	72.3	115.4	96.4	7.88	24.89	5.94	33.9	23.26	59.7	53.4	214.7
FALSE	Medium	IsMasterProtein	Q07410		P89894; Q07410; Q7LGS9	Putative uncharacterized protein YDL062W [OS=Saccharomyces cerevisiae S288C]	1.669	33	14	1	1	1	1	16	2.21	14	1	1	0	0
FALSE	High	IsMasterProtein	P05750	RPS3	D6W107; P05750; sce:YNL178W	40S ribosomal protein S3 [OS=Saccharomyces cerevisiae S288C]	59.343	0	47	11	22	11	11	26.5	73.11	47	22	11	98	0	0.486	1.388	0.619	0.987	-1.04	0.47	-0.69	-0.02	0.685208	0.979451	0.908988	0.999894	1	1	1	1	53.4	152.4	67.9	108.4	109.7	10.29	39.85	7.93	82.77	17.25	44.2	51.2	181.4
FALSE	High	IsMasterProtein	P54780	RPL15B	D6VZU4; P54780; sce:YMR121C	60S ribosomal protein L15-B [OS=Saccharomyces cerevisiae S288C]	29.543	0	30	7	10	1	1	24.4	30.86	30	10	7	56	0
FALSE	High	IsMasterProtein	Q00764	TPS1	D6VQC3; Q00764; Q01801; Q05168; Q6J5J4; sce:YBR126C	Alpha,alpha-trehalose-phosphate synthase [UDP-forming] 56 kDa subunit [OS=Saccharomyces cerevisiae S288C]	14.81	0	10	4	4	4	4	56.1	11.62	10	4	4	72	0	2.101	2.56	2.149	1.247	1.07	1.36	1.1	0.32	0.768799	0.586091	0.74847	0.706552	1	1	1	1	121.8	148.5	124.7	72.3	58	18.75	22.81	11.12	107.06	7.43	113.6	87	102.9
FALSE	High	IsMasterProtein	Q12420	SNU66	D6W308; Q12420; sce:YOR308C	66 kDa U4/U6.U5 small nuclear ribonucleoprotein component [OS=Saccharomyces cerevisiae S288C]	6.52	0	4	1	1	1	1	66.4	3.35	4	1	1	52	0
FALSE	High	IsMasterProtein	P43573	BUD27	D6VTK7; P43573; sce:YFL023W	Bud site selection protein 27 [OS=Saccharomyces cerevisiae S288C]	66.043	0	20	15	19	14	15	91.4	53.04	20	19	15	47	0	2.338	0.86	1.876	0.947	1.23	-0.22	0.91	-0.08	0.00229077	0.826828	0.0127638	0.997901	0.050261	1	0.152766	1	178.6	65.7	143.3	72.3	76.4	1.22	6.71	13.39	20.75	0.82	180	183.1	63.7
FALSE	Low	IsMasterProtein	P26364	ADK2	D3DM78; P26364; sce:YER170W	GTP:AMP phosphotransferase, mitochondrial [OS=Saccharomyces cerevisiae S288C]	1.094	74	4	1	1	1	1	25.2	0	4	1	1	120	0	0.4	0.735	0.515	0.828	-1.32	-0.44	-0.96	-0.27	0.0159721	0.619752	0.073737	0.772261	0.128335	1	0.365189	1	52.3	96.1	67.3	108.3	130.7	18.12	2.18	13.58	23.16	28.03	45.7	59.1	94
FALSE	High	IsMasterProtein	P39986	SPF1	D3DLL8; P39986; sce:YEL031W	Endoplasmic reticulum transmembrane helix translocase [OS=Saccharomyces cerevisiae S288C]	13.212	0	3	3	3	3	3	135.2	8.71	3	3	3	128	0	2.153	4.284	3.001	2.801	1.11	2.1	1.59	1.49	0.61967	0.124001	0.304223	0.671552	1	0.549628	0.84027	1	84	167	117	109.2	39	6.02	21.36	13.24	50.65	67.1	90.5	83.1	201
FALSE	High	IsMasterProtein	P38990	SAK1	D3DM35; P38990; sce:YER129W	SNF1-activating kinase 1 [OS=Saccharomyces cerevisiae S288C]	18.075	0	6	4	4	4	4	126.8	12.46	6	4	4	89	0	0.468	0.503	0.5	0.452	-1.1	-0.99	-1	-1.15	0.693671	0.764219	0.759793	0.273393	1	1	1	0.732234	73.7	79.2	78.8	71.2	157.5	12.67	16.32	11.41	67.87	2.1	69.6	83.3	91.9
FALSE	High	None	P0C2I5	TY1B-LR2	D6VYF8; P0C2I5; sce:YLR157C-B	Transposon Ty1-LR2 Gag-Pol polyprotein [OS=Saccharomyces cerevisiae S288C]	78.8	0	11	16	21	0	3	198.4	65.81	11	21	16	97	0	1.395	1.067	1.32	3.034	0.48	0.09	0.4	1.6	0.179589	0.99241	0.308057	0.000135134	0.515868	1	0.847739	0.0112402	90.4	69.2	85.6	196.7	64.8	11.5	9.93	2.91	14.19	12	88.7	75.4	67.1
FALSE	High	IsMasterProtein	P36059	NNR2	D6VX46; P36059; Q6Q5N3; sce:YKL151C	ATP-dependent (S)-NAD(P)H-hydrate dehydratase [OS=Saccharomyces cerevisiae S288C]	4.251	3	5	2	2	2	2	37.3	5.06	5	2	2	48	0	1.124	0.397	0.761	0.689	0.17	-1.33	-0.39	-0.54	0.969422	0.00853117	0.565889	0.303112	1	0.141939	1	0.769429	127.5	45	86.4	78.2	113.5	7.16	3.2	9.55	26.73	18.55	144.4	130.5	49.6
FALSE	High	IsMasterProtein	P05738	RPL9A	D6VU02; P05738; sce:YGL147C	60S ribosomal protein L9-A [OS=Saccharomyces cerevisiae S288C]	22.088	0	25	4	7	2	4	21.6	25.21	25	7	4	52	0	0.346	0.998	0.43	0.657	-1.53	0	-1.22	-0.61	0.038293	1	0.103485	0.33415	0.218899	1	0.424658	0.806594	50.4	145.3	62.6	95.7	145.6	15.36	21.15	18.73	33.92	26.72	45.6	56.7	170.6
FALSE	High	IsMasterProtein	Q06706	IKI3	D6VZ19; O00036; Q06706; sce:YLR384C	Elongator complex protein 1 [OS=Saccharomyces cerevisiae S288C]	22.064	0	5	4	5	4	4	152.9	16.1	5	5	4	91	0	0.686	0.741	0.788	0.634	-0.54	-0.43	-0.34	-0.66	0.678789	0.83092	0.922731	0.783792	1	1	1	1	83.7	90.5	96.2	77.3	122.1	26.88	11.15	3.19	32.04	37.02	67	98.4	94.9
FALSE	High	IsMasterProtein	P02309	HHF1; HHF2	D6VQ10; P02309; sce:YBR009C; sce:YNL030W	Histone H4 [OS=Saccharomyces cerevisiae S288C]	34.902	0	51	6	7	6	6	11.4	25.86	51	7	6	165	0	0.771	3.873	1.756	1.182	-0.38	1.95	0.81	0.24	0.999932	0.889744	0.997183	0.985304	1	1	1	1	43.4	218.3	98.9	66.6	56.4	7.25	37.61	11.35	102.54	19.91	43.9	39.6	275.2
FALSE	High	IsMasterProtein	P35182	PTC1	D6VRY2; P35182; sce:YDL006W	Protein phosphatase 2C homolog 1 [OS=Saccharomyces cerevisiae S288C]	37.306	0	29	6	8	6	6	31.5	20.32	29	8	6	102	0	1.489	0.18	0.836	0.528	0.57	-2.47	-0.26	-0.92	0.988264	0.227719	0.999725	0.379585	1	0.805799	1	0.871358	181.1	21.9	101.7	64.2	121.6	7.86	21.49	4.18	71.8	20.15	203	181.6	20
FALSE	High	None	P26754	RFA2	D6W0N3; P26754; P38905; sce:YNL312W	Replication factor A protein 2 [OS=Saccharomyces cerevisiae S288C]	2.005	11	2	1	1	0	1	29.9	2.39	2	1	1	125	0
FALSE	High	IsMasterProteinCandidate	P87262	RPL34A	D3DLW0; P87262; Q03189; sce:YER056C-A	60S ribosomal protein L34-A [OS=Saccharomyces cerevisiae S288C]	17.231	0	37	5	6	0	5	13.6	15.83	37	6	5	52	0	1.652	3.402	1.846	1.789	0.72	1.77	0.88	0.84	0.47378	0.0191595	0.301051	0.352383	0.914689	0.194929	0.839128	0.829689	84.6	174.3	94.5	91.6	51.2	29.98	6.88	0.9	32.22	6.15	105	68.3	166.1
FALSE	High	IsMasterProtein	Q02959	HOS3	D6W3Q2; Q02959; sce:YPL116W	Histone deacetylase HOS3 [OS=Saccharomyces cerevisiae S288C]	7.17	0	3	1	2	1	1	79.2	8.78	3	2	1	71	0	0.66	0.853	0.754	1.069	-0.6	-0.23	-0.41	0.1	0.68536	0.990462	0.902237	0.999642	1	1	1	1	70	90.5	80	113.4	106.1	17.67	13.08	3.71	47.93	11.33	59.6	76.7	95.9
FALSE	High	None	P38989	SMC2	D6VTR1; P38989; sce:YFR031C	Structural maintenance of chromosomes protein 2 [OS=Saccharomyces cerevisiae S288C]	2.123	7	1	1	1	0	1	133.8	2.22	1	1	1	117	0	3.311	0.763	3.825	5.729	1.73	-0.39	1.94	2.52	0.00427002	0.675423	0.00233204	0.000547227	0.0629006	1	0.0636316	0.0174657	127.7	29.4	147.6	221	38.6	17.96	26.07	1.24	23.88	10.34	155.9	120.8	26.2
FALSE	High	IsMasterProtein	Q12271	INP53	D6W2G8; Q12271; sce:YOR109W	Polyphosphatidylinositol phosphatase INP53 [OS=Saccharomyces cerevisiae S288C]	223.86	0	40	38	51	38	38	124.5	164.6	40	51	38	96	0	2.372	0.762	1.656	0.992	1.25	-0.39	0.73	-0.01	0.112007	0.909938	0.506241	0.832888	0.387078	1	1	1	185.9	59.8	129.7	77.7	78.4	3.15	3.34	3.64	42.4	0.57	200.3	191.6	61.5
FALSE	High	IsMasterProtein	P40053	AIM9	D3DLY7; P40053; sce:YER080W	Altered inheritance of mitochondria protein 9, mitochondrial [OS=Saccharomyces cerevisiae S288C]	3.976	3	2	1	1	1	1	72.4	3.5	2	1	1	1	0	0.583	0.845	0.771	0.875	-0.78	-0.24	-0.38	-0.19	0.419119	0.984841	0.91392	1	0.857163	1	1	1	66.6	96.5	88	100	114.2	9.72	5.94	6.37	47.7	19.63	58.9	67.6	95.3
FALSE	High	None	P18238	AAC3	D6VQ85; P18238; sce:YBR085W	ADP,ATP carrier protein 3 [OS=Saccharomyces cerevisiae S288C]	9.749	0	8	3	3	0	3	33.3	8.86	8	3	3	83	0	0.609	1.952	0.795	0.828	-0.72	0.97	-0.33	-0.27	0.966958	0.897068	0.998961	0.878127	1	1	1	1	58.5	187.4	76.3	79.5	96	11.18	35.73	1.43	77.18	19.54	64.7	55.2	247.9
FALSE	Low	IsMasterProtein	Q12525	MHT1	D6VXU7; Q12525; sce:YLL062C	Homocysteine S-methyltransferase 1 [OS=Saccharomyces cerevisiae S288C]	0.947	87	9	1	1	1	1	36.7	0	9	1	1	49	0
FALSE	High	None	Q04182	PDR15	D6VT38; Q04182; sce:YDR406W	ATP-dependent permease PDR15 [OS=Saccharomyces cerevisiae S288C]	23.584	0	4	7	9	0	7	172.1	21.64	4	9	7	50	0	1.678	1.886	1.32	1.497	0.75	0.92	0.4	0.58	0.456783	0.282372	0.891829	0.780616	0.904902	0.918308	1	1	112.1	126	88.2	100	66.8	33.53	17.32	16.83	15.34	38.42	142.8	88.1	142.6
FALSE	High	IsMasterProtein	Q08932	RSA1	D6W3H5; Q08932; sce:YPL193W	Ribosome assembly 1 protein [OS=Saccharomyces cerevisiae S288C]	4.924	1	3	1	1	1	1	44	3.66	3	1	1	34	0	0.138	0.084	0.339	1.221	-2.86	-3.58	-1.56	0.29	0.00515357	0.0013576	0.102773	0.999232	0.0699213	0.0805374	0.423249	1	27.5	16.7	67.8	244	199.9	14.69	2.79	26.82	22.26	34.37	28.1	22.8	15.1
FALSE	High	IsMasterProtein	P28777	ARO2	D6VU01; P28777; sce:YGL148W	Chorismate synthase [OS=Saccharomyces cerevisiae S288C]	39.904	0	31	8	10	8	8	40.8	34.97	31	10	8	58	0	1.547	0.809	1.312	0.943	0.63	-0.31	0.39	-0.08	0.205523	0.786341	0.601137	0.982528	0.564943	1	1	1	141.6	74	120.1	86.3	91.5	1.61	8.87	8.57	31.13	4.05	135.7	138.9	67.4
FALSE	High	IsMasterProtein	P05318	RPP1A	D6VRR8; P05318; sce:YDL081C	60S acidic ribosomal protein P1-alpha [OS=Saccharomyces cerevisiae S288C]	8.61	0	21	1	5	1	1	10.9	9.93	21	5	1	94	0	0.611	0.552	0.432	1.12	-0.71	-0.86	-1.21	0.16	0.573803	0.403365	0.149912	0.999996	1	1	0.539965	1	82.3	74.3	58.1	150.8	134.6	30.71	7.23	10.84	27.26	28.37	64.9	100.9	69.4
FALSE	High	IsMasterProtein	Q07527	TRM3	D6VRN8; P89896; Q05336; Q07527; Q7LGS3; sce:YDL112W	tRNA (guanosine(18)-2'-O)-methyltransferase [OS=Saccharomyces cerevisiae S288C]	9.481	0	2	3	3	3	3	164.9	7.42	2	3	3	54	0	0.435	0.886	0.621	0.713	-1.2	-0.17	-0.69	-0.49	0.515073	0.999742	0.892339	1	0.957636	1	1	1	60.3	122.9	86.1	98.9	138.6	11.25	27.44	4.92	85.62	17.19	55.1	47	126.2
FALSE	High	IsMasterProtein	P30619	SEC1	D6VSE4; P30619; sce:YDR164C	Protein transport protein SEC1 [OS=Saccharomyces cerevisiae S288C]	5.561	1	4	2	2	2	2	83.4	4.97	4	2	2	57	0	0.495	0.644	0.63	0.631	-1.02	-0.63	-0.67	-0.66	0.0464924	0.27029	0.234099	0.0760372	0.250798	0.891645	0.707843	0.328912	68.4	89.1	87.2	87.2	138.3	22.95	3.9	28.15	20.17	2.88	59.5	82.6	93.9
FALSE	High	IsMasterProtein	P26785	RPL16B	D6W1B0; P26785; sce:YNL069C	60S ribosomal protein L16-B [OS=Saccharomyces cerevisiae S288C]	15.548	0	24	5	5	3	3	22.2	11.63	24	5	5	83	0	0.49	1.038	0.723	0.979	-1.03	0.05	-0.47	-0.03	0.86829	1	0.99457	0.983345	1	1	1	1	58.1	123	85.7	116	118.5	3.74	11.15	8.48	117.35	23.15	42.5	40.4	95
FALSE	High	IsMasterProtein	P29453	RPL8B	D6VXW2; P29453; sce:YLL045C	60S ribosomal protein L8-B [OS=Saccharomyces cerevisiae S288C]	91.447	0	55	13	60	1	1	28.1	194.25	55	60	13	68	0	1.167	0.819	0.851	0.927	0.22	-0.29	-0.23	-0.11	0.999283	0.997541	0.999118	0.998888	1	1	1	1	94	65.9	68.5	74.6	80.5	12.6	12.37	0.81	89.8	4.32	78.6	94	65.8
FALSE	High	IsMasterProtein	P40002	MIT1	D3DLP0; P40002; sce:YEL007W	Transcriptional regulator MIT1 [OS=Saccharomyces cerevisiae S288C]	47.835	0	12	7	16	6	6	72.5	64.46	12	16	7	7	1	0.86	1.102	1.181	8.196	-0.22	0.14	0.24	3.03	0.836662	0.967058	0.781481	5.75286e-06	1	1	1	0.003639	38.9	49.8	53.4	370.6	45.2	2.72	9.81	3.68	20.84	4.68	34.2	35.5	47.8
FALSE	High	IsMasterProteinCandidate	P02407	RPS17A	D6VZF0; P02407; sce:YML024W	40S ribosomal protein S17-A [OS=Saccharomyces cerevisiae S288C]	17.814	0	24	4	5	0	4	15.8	15.27	24	5	4	62	0	0.362	0.917	0.602	1.324	-1.47	-0.12	-0.73	0.41	0.246091	0.99991	0.806671	0.984172	0.62531	1	1	1	40.6	102.9	67.5	148.6	112.2	16.75	20.92	5.26	63.42	21.27	42.1	33.2	110
FALSE	High	IsMasterProtein	P13574	STE12	D3DL35; P13574; sce:YHR084W	Protein STE12 [OS=Saccharomyces cerevisiae S288C]	11.042	0	4	2	3	2	2	77.8	12.59	4	3	2	134	0	0.427	0.7	0.692	1.193	-1.23	-0.52	-0.53	0.25	0.0596983	0.659358	0.63508	1	0.283444	1	1	1	50.8	83.1	82.3	141.8	118.9	4.55	3.49	3.95	32.28	26.09	49.6	52.9	81.8
FALSE	High	IsMasterProtein	P34909	MOT2	D3DLX3; P34909; sce:YER068W	General negative regulator of transcription subunit 4 [OS=Saccharomyces cerevisiae S288C]	140.526	0	35	21	32	21	21	65.3	106.34	35	32	21	149	0	2.475	1.197	3.493	6.922	1.31	0.26	1.8	2.79	0.24517	0.994835	0.0773393	0.0153621	0.62531	1	0.371743	0.119264	89	43	125.6	248.9	36	1.79	10.59	20.03	49.83	17.68	89.6	87.3	39.7
FALSE	Medium	IsMasterProtein	Q04660	ERB1	D6VZM4; Q04660; sce:YMR049C	Ribosome biogenesis protein ERB1 [OS=Saccharomyces cerevisiae S288C]	1.851	20	2	1	1	1	1	91.6	0	2	1	1	65	0
FALSE	High	IsMasterProtein	Q05948		D6VYM5; Q05948; sce:YLR225C	Uncharacterized SVF1-like protein YLR225C [OS=Saccharomyces cerevisiae S288C]	13.205	0	9	3	5	3	3	46.4	12.75	9	5	3	6	0	1.346	1.172	1.231	1.046	0.43	0.23	0.3	0.06	0.938623	0.995735	0.985622	0.999261	1	1	1	1	119.4	104	109.3	92.8	88.8	17.74	31.14	1.99	45.47	31.97	136.7	106.2	131.3
FALSE	Low	IsMasterProtein	P36122	BCH2	D6VX92; P36122; sce:YKR027W	Protein BCH2 [OS=Saccharomyces cerevisiae S288C]	1.028	76	1	1	1	1	1	88	0	1	1	1	69	0
FALSE	High	IsMasterProtein	P31688	TPS2	D6VS60; P31688; sce:YDR074W	Trehalose-phosphatase [OS=Saccharomyces cerevisiae S288C]	48.061	0	17	13	13	13	13	102.9	32.5	17	13	13	75	0	1.102	1.571	1.327	1.042	0.14	0.65	0.41	0.06	0.998382	0.52237	0.857606	0.930293	1	1	1	1	91.1	129.9	109.8	86.2	82.7	5.43	2.25	4.9	39.25	5.99	99.1	91.7	138.1
FALSE	High	IsMasterProtein	P10592	SSA2	D6VXY0; P10592; sce:YLL024C	Heat shock protein SSA2 [OS=Saccharomyces cerevisiae S288C]	190.4	0	59	30	46	4	4	69.4	153.44	59	46	30	184	0	0.884	0.668	0.941	0.687	-0.18	-0.58	-0.09	-0.54	0.999664	0.931564	0.99999	0.548116	1	1	1	1	98.8	74.6	105.1	76.7	111.7	24.45	6.91	9.23	59.05	23.9	86.2	122.3	73.8
FALSE	High	IsMasterProtein	P12688	YPK1	D6VX69; P12688; sce:YKL126W	Serine/threonine-protein kinase YPK1 [OS=Saccharomyces cerevisiae S288C]	23.556	0	9	5	5	2	2	76.4	16.83	9	5	5	144	1	0.779	1.052	0.829	0.726	-0.36	0.07	-0.27	-0.46	0.428786	0.997827	0.67038	0.235706	0.875088	1	1	0.675776	86.2	116.4	91.7	80.4	110.7	4.89	6.88	16.82	19.95	12.73	96.3	89.9	131.9
FALSE	High	IsMasterProtein	P34216	EDE1	D6VPV1; P34216; sce:YBL047C	EH domain-containing and endocytosis protein 1 [OS=Saccharomyces cerevisiae S288C]	146.423	0	26	25	34	25	25	150.7	110.51	26	34	25	84	0	0.891	0.327	0.851	0.49	-0.17	-1.61	-0.23	-1.03	0.990278	0.00747607	0.960342	0.165919	1	0.134102	1	0.547819	130.9	48.1	125.1	72	146.9	2.42	3.15	4.24	38.52	14.65	130	125.6	48
FALSE	High	IsMasterProtein	P38070	YPK3	D6VQ29; P38070; sce:YBR028C	Serine/threonine-protein kinase YPK3 [OS=Saccharomyces cerevisiae S288C]	14.148	0	12	3	5	3	3	59.6	22.67	12	5	3	68	0	0.922	0.47	1.05	0.884	-0.12	-1.09	0.07	-0.18	0.999354	0.142649	0.99995	0.996868	1	0.595494	1	1	103.8	52.9	118.2	99.6	112.6	6.45	21.86	6.46	36.53	15.53	97	106.3	60.5
FALSE	High	IsMasterProtein	P25367	RNQ1	D6VQY7; P25367; Q8NKJ9; Q8TF94; Q8TFA2; Q8TFC8; Q8TFP4; Q8TFP5; Q8TFP6; Q8TFP7; Q8TFP8; sce:YCL028W	[PIN+] prion protein RNQ1 [OS=Saccharomyces cerevisiae S288C]	20.545	0	14	4	4	4	4	42.6	14.67	14	4	4	14	0	0.546	0.77	0.776	1.268	-0.87	-0.38	-0.37	0.34	0.284134	0.898116	0.9079	0.733916	0.688756	1	1	1	58.5	82.6	83.2	135.9	107.2	16.04	24.95	1.27	42.61	7.22	60.7	48.3	91.3
FALSE	High	IsMasterProtein	P54730	UBX4	D6VZP1; P54730; sce:YMR067C	UBX domain-containing protein 4 [OS=Saccharomyces cerevisiae S288C]	9.919	0	6	3	3	3	3	46.9	5.75	6	3	3	76	0	2.012	1.555	2.051	1.629	1.01	0.64	1.04	0.7	0.00261593	0.0261425	0.0022546	0.0163186	0.0536087	0.22942	0.0636316	0.124277	126.5	97.8	129	102.5	62.9	7.45	12.36	9.82	4.03	10.8	144.2	129.8	115.4
FALSE	Medium	IsMasterProtein	P38164	SEA4	D6VPP9; P38164; Q86ZS4; sce:YBL104C	SEH-associated protein 4 [OS=Saccharomyces cerevisiae S288C]	1.919	17	1	1	1	1	1	117.6	2.66	1	1	1	57	0	0.67	0.715	1.061	1.916	-0.58	-0.48	0.09	0.94	0.978	0.989879	0.999998	0.311902	1	1	1	0.777386	63.2	67.5	100.2	180.8	94.4	34.27	26.61	11.93	106.92	31.75	47	28.7	47.4
FALSE	High	IsMasterProtein	P54860	UFD2	D6VRG3; P54860; sce:YDL190C	E4 ubiquitin-protein ligase UFD2 [OS=Saccharomyces cerevisiae S288C]	3.804	3	2	1	1	1	1	109.8	3.96	2	1	1	85	0	0.572	0.797	0.673	0.578	-0.81	-0.33	-0.57	-0.79	0.220669	0.887587	0.505856	0.200872	0.589647	1	1	0.609906	70.5	98.2	82.9	71.2	123.3	18.01	33.76	6.38	20.81	21.25	62.4	80.6	126
FALSE	High	IsMasterProtein	P34217	PIN4	D6VPU8; P34217; sce:YBL051C	RNA-binding protein PIN4 [OS=Saccharomyces cerevisiae S288C]	106.318	0	29	16	26	16	16	73.7	87.7	29	26	16	124	0	1.748	0.884	2.045	10.275	0.81	-0.18	1.03	3.36	0.850453	0.999787	0.695394	0.02565	1	1	1	0.159237	61.3	31	71.7	360.3	35.1	6.82	3.16	40.5	61.52	3.64	54.8	60.4	28.5
FALSE	High	None	Q12490	TY1B-BL	D6VPZ6; Q12490; sce:YBL005W-B	Transposon Ty1-BL Gag-Pol polyprotein [OS=Saccharomyces cerevisiae S288C]	28.818	0	4	7	9	0	1	198.8	21.38	4	9	7	97	0	1.397	1.224	1.343	3.348	0.48	0.29	0.43	1.74	0.832723	0.973654	0.888921	0.00871267	1	1	1	0.100109	84.6	74.2	81.4	202.8	60.6	7.86	10.74	5.11	47.25	29.49	73.9	66.1	66.1
FALSE	Low	IsMasterProtein	P20606	SAR1	D6W3F2; P20606; sce:YPL218W	Small COPII coat GTPase SAR1 [OS=Saccharomyces cerevisiae S288C]	0.892	92	13	1	1	1	1	21.4	2.32	13	1	1	126	0	0.284	0.419	0.323	0.423	-1.82	-1.26	-1.63	-1.24	0.0741908	0.272629	0.114995	0.256465	0.32661	0.894498	0.449421	0.708361	53	78.1	60.3	78.8	186.4	22.26	21.2	1.47	48.77	19	43.8	60.2	88
FALSE	High	IsMasterProtein	Q06078	UTP21	D6VZ43; Q06078; sce:YLR409C	U3 small nucleolar RNA-associated protein 21 [OS=Saccharomyces cerevisiae S288C]	6.751	0	5	3	3	3	3	104.7	6.38	5	3	3	52	0	12.185	57.253	18.757	7.766	3.61	5.84	4.23	2.96									72.9	342.3	112.1	46.4	6	9.96	16.94	28.29	74.91		70.3	80.9	314.2
FALSE	Medium	IsMasterProtein	P40345	LRO1	D6W1I3; P40345; sce:YNR008W	Phospholipid:diacylglycerol acyltransferase [OS=Saccharomyces cerevisiae S288C]	1.589	37	1	1	1	1	1	75.3	1.64	1	1	1	79	0
FALSE	Low	IsMasterProtein	P41903	TES1	D6VWJ4; P41903; sce:YJR019C	Peroxisomal acyl-coenzyme A thioester hydrolase 1 [OS=Saccharomyces cerevisiae S288C]	1.095	74	3	1	1	1	1	40.2	2.2	3	1	1	80	0	4.399	15.235	12.71	5.464	2.14	3.93	3.67	2.45	0.129212	0.00714073	0.0104639	0.0163323	0.415868	0.131487	0.141148	0.124277	64.5	223.4	186.4	80.1	14.7	1.33	6.4	15.73	95.65	20.22	55	53.9	180.2
FALSE	High	None	Q04706	TY1A-ML1	D6VZD1; Q04706; sce:YML045W-A	Transposon Ty1-ML1 Gag polyprotein [OS=Saccharomyces cerevisiae S288C]	66.609	0	38	12	17	0	2	49.1	53.8	38	17	12	21	0	0.823	0.794	0.464	3.415	-0.28	-0.33	-1.11	1.77	0.999906	0.999786	0.949347	0.999119	1	1	1	1	61	58.8	34.4	253.1	74.1	15.42	4.46	39.15	79.75	7.12	71.9	57.8	60.3
FALSE	High	IsMasterProtein	P53297	PBP1	D6VUW2; P53297; sce:YGR178C	PAB1-binding protein 1 [OS=Saccharomyces cerevisiae S288C]	183.218	0	39	31	52	31	31	78.7	149.92	39	52	31	124	0	1.857	1.163	1.921	12.036	0.89	0.22	0.94	3.59	0.817361	0.999533	0.786011	0.0248257	1	1	1	0.157595	54.3	34	56.2	351.8	29.2	7.55	4.02	17.77	64.5	6.08	55.3	49.7	31.9
FALSE	High	IsMasterProtein	Q00955	ACC1	D6W1J1; Q00955; sce:YNR016C	Acetyl-CoA carboxylase [OS=Saccharomyces cerevisiae S288C]	2109.03	0	79	177	1536	169	169	250.2	6246.81	79	1536	177	160	8	0.247	0.91	0.317	0.254	-2.02	-0.14	-1.66	-1.98	0.00249556	0.996776	0.00772943	0.0034701	0.052292	1	0.116542	0.056157	41.7	153.6	53.4	42.9	168.8	8.16	11.92	11.79	38.95	6.59	40.2	45.1	143.9
FALSE	High	IsMasterProtein	Q12044	RCN2	D6W2S5; Q12044; sce:YOR220W	Regulator of calcineurin 2 [OS=Saccharomyces cerevisiae S288C]	56.274	0	42	9	15	9	9	29.2	54.26	42	15	9	0	0	1.763	0.918	1.88	1.01	0.82	-0.12	0.91	0.01	0.137854	0.99673	0.0915354	0.889029	0.436349	1	0.395688	1	143.2	74.6	152.7	82.1	81.2	3.59	13.24	8.1	36.2	4.92	135.3	142.4	65.8
FALSE	High	IsMasterProtein	P39108	PEX7	D6VSC5; P39108; sce:YDR142C	Peroxisomal targeting signal 2 receptor [OS=Saccharomyces cerevisiae S288C]	2.623	5	2	1	1	1	1	42.3	1.79	2	1	1	66	0
FALSE	High	IsMasterProtein	Q12446	LAS17	D6W2N7; Q12446; sce:YOR181W	Proline-rich protein LAS17 [OS=Saccharomyces cerevisiae S288C]	8.966	0	5	3	3	3	3	67.5	7.99	5	3	3	72	0	0.433	0.76	0.642	0.564	-1.21	-0.4	-0.64	-0.83	0.0165275	0.644368	0.236789	0.0347881	0.131876	1	0.714095	0.189438	61.5	107.8	91.1	80	141.9	9.8	14.98	12.32	17.87	27	67.4	58.6	122.6
FALSE	High	IsMasterProtein	P33749	MSN4	D6VXM5; P33749; P35726; sce:YKL062W	Zinc finger protein MSN4 [OS=Saccharomyces cerevisiae S288C]	13.767	0	8	5	6	5	5	69.7	11.07	8	6	5	111	0	0.756	0.848	0.887	1.305	-0.4	-0.24	-0.17	0.38	0.956537	0.99552	0.998996	0.723446	1	1	1	1	75.5	84.6	88.5	130.2	99.8	5.02	5.63	4.42	58.8	40.78	64.4	69.1	77.8
FALSE	High	IsMasterProtein	Q08959	PGC1	D6W3G4; Q08959; sce:YPL206C	Phosphatidylglycerol phospholipase C [OS=Saccharomyces cerevisiae S288C]	5.945	0	4	1	1	1	1	37	3.24	4	1	1	56	0
FALSE	High	IsMasterProtein	P16467	PDC5	D6VYC9; P16467; sce:YLR134W	Pyruvate decarboxylase isozyme 2 [OS=Saccharomyces cerevisiae S288C]	26.555	0	10	3	6	1	1	61.9	25.78	10	6	3	99	0
FALSE	High	IsMasterProtein	P16370	RPB3	D6VVQ8; P16370; sce:YIL021W	DNA-directed RNA polymerase II subunit RPB3 [OS=Saccharomyces cerevisiae S288C]	9.279	0	9	2	2	2	2	35.3	7.35	9	2	2	82	0	1.409	1.203	1.285	1.039	0.49	0.27	0.36	0.05	0.519283	0.909982	0.764986	0.999927	0.960163	1	1	1	113.3	96.7	103.3	83.5	80.4	20.14	12.18	4.51	5.5	37.56	105.5	140.5	113.3
FALSE	High	IsMasterProtein	P04802	DPS1	D6VXY6; P04802; sce:YLL018C	Aspartate--tRNA ligase, cytoplasmic [OS=Saccharomyces cerevisiae S288C]	40.621	0	13	6	12	5	6	63.5	41.78	13	12	6	85	0	0.968	1.062	1.002	0.783	-0.05	0.09	0	-0.35	0.999985	0.99969	1	0.995955	1	1	1	1	97	106.5	100.4	78.5	100.2	11.68	3.74	3.55	41.31	5.91	87	102.7	101.1
FALSE	High	IsMasterProtein	P38295	EHT1	D6VQH2; P38295; sce:YBR177C	Medium-chain fatty acid ethyl ester synthase/esterase 2 [OS=Saccharomyces cerevisiae S288C]	16.015	0	14	4	4	4	4	51.2	11.3	14	4	4	65	0	2.079	2.006	1.362	0.946	1.06	1	0.45	-0.08	0.161471	0.189195	0.80937	0.999878	0.480648	0.712709	1	1	147.1	142	96.4	66.9	70.8	1.65	20.39	27.96	2.77	46.26	159.1	155.4	131.3
FALSE	Medium	IsMasterProtein	P31244	RAD16	D6VQB3; P31244; sce:YBR114W	DNA repair protein RAD16 [OS=Saccharomyces cerevisiae S288C]	1.96	14	1	1	1	1	1	91.4	0	1	1	1	109	0	0.68	0.852	0.959	0.779	-0.56	-0.23	-0.06	-0.36	0.976127	0.999583	0.999999	0.986974	1	1	1	1	72.8	91.2	102.6	83.4	107	21.23	8.05	8.75	104.6	23.41	48.9	66.2	75.5
FALSE	High	IsMasterProtein	P80210	ADE12	D6W0X0; P80210; sce:YNL220W	Adenylosuccinate synthetase [OS=Saccharomyces cerevisiae S288C]	10.912	0	7	3	4	3	3	48.2	9.86	7	4	3	87	0	1.849	1.53	1.537	1.184	0.89	0.61	0.62	0.24	0.190888	0.487906	0.477668	0.736046	0.538894	1	1	1	129.3	107	107.5	82.9	70	9.34	3.93	15.85	27.11	40.33	135.1	118.3	101.7
FALSE	High	IsMasterProtein	P04456	RPL25	D6W1U1; P04456; sce:YOL127W	60S ribosomal protein L25 [OS=Saccharomyces cerevisiae S288C]	31.037	0	39	5	8	5	5	15.7	25.32	39	8	5	71	0	0.416	1.41	0.868	0.514	-1.27	0.5	-0.2	-0.96	0.0977903	0.793248	0.993322	0.495555	0.362455	1	1	1	46.9	158.8	97.8	58	112.7	32.08	19.22	28.92	40.12	6.01	36.7	58.2	179.5
FALSE	High	IsMasterProtein	P52593	NUP188	D6W0I1; P52593; sce:YML103C	Nucleoporin NUP188 [OS=Saccharomyces cerevisiae S288C]	7.284	0	1	1	1	1	1	188.5	4.71	1	1	1	79	0	0.377	0.652	0.489	0.541	-1.41	-0.62	-1.03	-0.89	0.212225	0.849485	0.464852	0.524638	0.57647	1	1	1	57.6	99.6	74.7	82.7	152.8	16.89	46.34	39.25	41.35	11.89	50	63.5	136.8
FALSE	High	IsMasterProtein	P36114		D6VX83; P36114; sce:YKR018C	IML2-like protein YKR018C [OS=Saccharomyces cerevisiae S288C]	32.893	0	10	5	5	5	5	81.7	18.72	10	5	5	1	0	0.823	0.364	0.723	0.47	-0.28	-1.46	-0.47	-1.09	0.99482	0.223976	0.953636	0.157136	1	0.798614	1	0.530515	126.7	56.1	111.3	72.3	154	5.54	3.18	2.61	57.05	3.73	126.8	137.2	57.1
FALSE	High	IsMasterProtein	P39523		D6VZU7; P39523; sce:YMR124W	Uncharacterized protein YMR124W [OS=Saccharomyces cerevisiae S288C]	108.553	0	28	22	28	22	22	105.8	94.42	28	28	22	13	0	0.872	0.614	0.981	2.623	-0.2	-0.7	-0.03	1.39	0.792543	0.0212631	0.999966	0.000368999	1	0.203417	1	0.0173549	75.3	53	84.7	226.4	86.3	11.98	3.42	9.02	13.08	2.67	77	65	51
FALSE	High	IsMasterProtein	P05030	PMA1	D6VUC9; P05030; sce:YGL008C	Plasma membrane ATPase 1 [OS=Saccharomyces cerevisiae S288C]	218.208	0	35	27	52	7	27	99.6	185.7	35	52	27	114	0	0.501	1.398	0.669	0.831	-1	0.48	-0.58	-0.27	0.302904	0.859851	0.757785	0.998708	0.716558	1	1	1	56.6	157.8	75.5	93.8	112.9	15.44	13.44	9.22	58.04	10.93	57.4	46.1	157.9
FALSE	High	IsMasterProtein	P41696	AZF1	D6W2H2; P41696; sce:YOR113W	Asparagine-rich zinc finger protein AZF1 [OS=Saccharomyces cerevisiae S288C]	3.061	3	1	1	1	1	1	101.1	2.2	1	1	1	108	0	7.998	2.431	11.865	5.391	3	1.28	3.57	2.43									164.3	49.9	243.8	110.8	20.5	3.41	6.69	12.66	43.92		168.1	176.4	54.9
FALSE	High	IsMasterProtein	Q07878	VPS13	D6VXW6; O00040; Q07878; sce:YLL040C	Intermembrane lipid transfer protein VPS13 [OS=Saccharomyces cerevisiae S288C]	113.045	0	11	29	30	29	29	357.6	82.33	11	30	29	148	0	0.509	0.612	0.789	0.587	-0.97	-0.71	-0.34	-0.77	0.0262159	0.108574	0.661256	0.0487397	0.174116	0.508747	1	0.247456	69.7	83.8	108	80.4	136.9	22.08	2.74	25.32	14.8	5.7	82.5	60.2	83.1
FALSE	High	IsMasterProtein	P32864	MRS6	D6W363; P32864; Q06761; sce:YOR370C	Rab proteins geranylgeranyltransferase component A [OS=Saccharomyces cerevisiae S288C]	10.157	0	3	1	2	1	1	67.3	5.47	3	2	1	79	0	0.187	0.332	0.238	0.29	-2.42	-1.59	-2.07	-1.78	0.0708133	0.304252	0.13237	0.270859	0.315732	0.954322	0.495416	0.730378	42	74.7	53.6	65.4	225	37.26	9.86	19.31	74.33	19.86	30.1	51.6	65.4
FALSE	High	IsMasterProtein	Q02792	RAT1	D6W2B4; Q02792; sce:YOR048C	5'-3' exoribonuclease 2 [OS=Saccharomyces cerevisiae S288C]	30.352	0	9	9	9	8	8	115.9	22.95	9	9	9	201	0	0.306	0.547	0.436	0.313	-1.71	-0.87	-1.2	-1.67	1.47508e-05	0.00118985	0.000155696	8.90631e-06	0.00542951	0.0758863	0.0255563	0.003639	57.6	103.2	82.3	59.1	188.6	6.1	5.25	3.35	7.98	0.63	62.1	56.9	102.5
FALSE	Low	IsMasterProtein	P35723	YET1	D6VXM2; P35723; Q6Q5G9; sce:YKL065C	Endoplasmic reticulum transmembrane protein 1 [OS=Saccharomyces cerevisiae S288C]	0.94	87	3	1	1	1	1	23.4	0	3	1	1	41	0
FALSE	High	IsMasterProtein	P32582	CYS4	D6VUT5; P32582; Q05177; Q27JK1; Q27JK4; sce:YGR155W	Cystathionine beta-synthase [OS=Saccharomyces cerevisiae S288C]	51.722	0	31	11	13	11	11	56	41.69	31	13	11	71	0	1.112	0.534	0.912	0.864	0.15	-0.91	-0.13	-0.21	0.829885	0.00174181	0.892718	0.866612	1	0.0805374	1	1	125.3	60.2	102.8	97.3	112.7	4.35	5.08	0.44	16.34	2.65	119.9	127.5	57.3
FALSE	High	IsMasterProteinCandidate	Q03434	TY1B-ML2	D6VZD5; Q03434; sce:YML039W	Transposon Ty1-ML2 Gag-Pol polyprotein [OS=Saccharomyces cerevisiae S288C]	86.433	0	13	18	23	0	3	198.4	72.17	13	23	18	97	0	1.376	1.132	1.33	3.49	0.46	0.18	0.41	1.8	0.410533	0.960556	0.511023	0.000465365	0.856085	1	1	0.0173549	84.4	69.5	81.6	214.1	61.4	9.7	10.13	2.93	22.23	14.12	82.4	71.8	68
FALSE	High	IsMasterProtein	Q03012	SPP1	D6W3N0; Q03012; sce:YPL138C	COMPASS component SPP1 [OS=Saccharomyces cerevisiae S288C]	6.438	0	5	1	2	1	1	41.4	7.49	5	2	1	115	0	0.719	0.598	0.84	0.818	-0.48	-0.74	-0.25	-0.29	0.975268	0.866974	0.998618	0.987826	1	1	1	1	82.1	68.2	95.9	93.3	114.2	23.25	1.24	3.77	89.15	8.47	56.9	79.3	56.3
FALSE	Medium	IsMasterProtein	A0A023PXK7		A0A023PXK7	Putative uncharacterized membrane protein YFL021C-A [OS=Saccharomyces cerevisiae S288C]	1.341	52	2	1	1	1	1	31.8	1.9	2	1	1	5	0	100	100	100	100	6.64	6.64	6.64	6.64									200.6	150.2	209.9	18.5	0	12.11	50.05	25.66	119.77		192.8	228.9	108.7
FALSE	High	IsMasterProtein	P54839	ERG13	D6W0F9; P54839; sce:YML126C	Hydroxymethylglutaryl-CoA synthase [OS=Saccharomyces cerevisiae S288C]	6.044	0	3	1	1	1	1	55	3.82	3	1	1	78	0	1.07	1.806	1.502	1.108	0.1	0.85	0.59	0.15	0.989669	0.018686	0.0926411	0.944151	1	0.194929	0.397182	1	80.5	135.9	113	83.3	75.2	9.3	2.91	17.54	0.45	13.96	81.4	92.8	149.7
FALSE	Medium	IsMasterProtein	P25347		A0A1S0T048; P25347	Uncharacterized protein YCR001W [OS=Saccharomyces cerevisiae S288C]	1.189	66	6	1	1	1	1	12.5	2.11	6	1	1	0	0	81.062	10.952	68.636	11.23	6.34	3.45	6.1	3.49									270.4	36.5	228.9	37.5	3.3	6.25	10.22	19.02	100.48		303.7	278	42.2
FALSE	High	IsMasterProtein	P05756	RPS13	D6VS50; P05756; sce:YDR064W	40S ribosomal protein S13 [OS=Saccharomyces cerevisiae S288C]	30.29	0	43	6	7	6	6	17	19.61	43	7	6	80	0	0.953	1.887	0.987	2.496	-0.07	0.92	-0.02	1.32	0.999997	0.726122	1	0.716583	1	1	1	1	68.9	136.3	71.3	180.3	72.2	13.59	32.25	6.38	53.14	17.34	62.2	75.5	171.1
FALSE	High	IsMasterProtein	P07283	SEC53	D6VTI5; P07283; Q70D76; Q70D77; sce:YFL045C	Phosphomannomutase [OS=Saccharomyces cerevisiae S288C]	2.997	4	6	1	1	1	1	29	3.74	6	1	1	63	0
FALSE	High	IsMasterProteinCandidate	P38754	RPL14B	D3DKR3; P38754; sce:YHL001W	60S ribosomal protein L14-B [OS=Saccharomyces cerevisiae S288C]	25.129	0	49	8	9	0	8	15.1	25.27	49	9	8	56	0	0.478	1.652	0.683	0.57	-1.06	0.72	-0.55	-0.81	0.443493	0.761887	0.900182	0.757358	0.897136	1	1	1	51.8	178.8	74	61.7	108.3	2.07	12.3	8.47	68.5	0.45	50.3	51.8	192.1
FALSE	High	IsMasterProtein	Q07895		D6VY03; Q07895; sce:YLR001C	FAS1 domain-containing protein YLR001C [OS=Saccharomyces cerevisiae S288C]	2.519	5	1	1	2	1	1	97.6	0	1	2	1	17	0	0.743	0.709	3.413	9.583	-0.43	-0.5	1.77	3.26	0.999479	0.998959	0.800784	0.324534	1	1	1	0.795074	27.6	26.4	127	356.6	37.2	0.16	69.07	127.94	61.58	0.77	19.6	19.6	31.9
FALSE	High	IsMasterProtein	Q02892	NOG1	D6W3S4; Q02892; sce:YPL093W	Nucleolar GTP-binding protein 1 [OS=Saccharomyces cerevisiae S288C]	29.689	0	10	6	7	6	6	74.4	19.81	10	7	6	96	0	0.482	0.717	0.503	0.824	-1.05	-0.48	-0.99	-0.28	0.0269261	0.437593	0.0362548	0.73709	0.177805	1	0.272266	1	68.6	101.9	71.6	117.1	142.2	7.34	15.44	9.49	5.75	38.3	70.9	63.9	111.7
FALSE	Low	IsMasterProtein	P51601	FOL2	D6VV45; P51601; sce:YGR267C	GTP cyclohydrolase 1 [OS=Saccharomyces cerevisiae S288C]	1.08	74	5	1	1	1	1	27.8	0	5	1	1	97	0
FALSE	High	IsMasterProtein	P05748	RPL15A	D6VY31; P05748; sce:YLR029C	60S ribosomal protein L15-A [OS=Saccharomyces cerevisiae S288C]	35.128	0	35	8	12	2	2	24.4	37.11	35	12	8	51	6	2.148	3.846	2.05	1.791	1.1	1.94	1.04	0.84	0.454431	0.079495	0.511492	0.55356	0.90392	0.416714	1	1	108	193.5	103.1	90.1	50.3	3.14	10.24	4.67	17.45	6.26	107.6	102.9	202.6
FALSE	High	IsMasterProtein	P47912	FAA4	D6W073; P47912; Q05743; sce:YMR246W	Long-chain-fatty-acid--CoA ligase 4 [OS=Saccharomyces cerevisiae S288C]	42.393	0	16	10	12	10	10	77.2	32.08	16	12	10	104	0	1.032	0.622	0.802	0.742	0.05	-0.69	-0.32	-0.43	0.999572	0.0247262	0.406125	0.133731	1	0.221763	1	0.477184	119.3	71.9	92.7	85.8	115.6	9.26	2.86	7.88	17.6	6.55	128.4	112.6	73.9
FALSE	High	IsMasterProtein	P49089	ASN1	D6W4E2; P49089; sce:YPR145W	Asparagine synthetase [glutamine-hydrolyzing] 1 [OS=Saccharomyces cerevisiae S288C]	139.446	0	42	23	37	18	18	64.4	119.65	42	37	23	64	5	1.629	0.447	0.961	0.685	0.7	-1.16	-0.06	-0.55	0.366953	0.0688039	0.999966	0.240283	0.807718	0.374345	1	0.683379	174.6	47.9	103	73.4	107.2	40.37	8.84	8.23	25.56	8.91	133.7	240.6	52.3
FALSE	Medium	IsMasterProtein	P54858	DOS2	D6VS54; P54858; sce:YDR068W	Protein DOS2 [OS=Saccharomyces cerevisiae S288C]	1.744	31	2	1	1	1	1	35.9	0	2	1	1	1	0	3.048	0.246	1.223	0.499	1.61	-2.02	0.29	-1	0.0292568	0.00975553	0.954766	0.182602	0.188854	0.14699	1	0.58606	270	21.8	108.3	44.2	88.6	3.46	6.38	8.09	9.16	55.69	295.7	281.6	24.3
FALSE	Medium	IsMasterProtein	P19955	YMR31	D6VTT2; P19955; sce:YFR049W	37S ribosomal protein YMR-31, mitochondrial [OS=Saccharomyces cerevisiae S288C]	1.361	52	6	1	1	1	1	13.7	0	6	1	1	52	0
FALSE	High	IsMasterProtein	P39079	CCT6	D6VSH1; P39079; sce:YDR188W	T-complex protein 1 subunit zeta [OS=Saccharomyces cerevisiae S288C]	12.659	0	9	3	3	3	3	59.9	7.67	9	3	3	46	0	0.824	0.741	0.895	0.809	-0.28	-0.43	-0.16	-0.31	0.776442	0.427994	0.967861	0.714511	1	1	1	1	92.3	83	100.3	90.6	112	19.99	14.2	7.78	16.54	5.49	86.3	114.7	98.9
FALSE	High	IsMasterProtein	P32356	NTH1	D6VRY8; E9P9U7; P32356; sce:YDR001C	Cytosolic neutral trehalase [OS=Saccharomyces cerevisiae S288C]	78.853	0	25	16	20	14	16	85.8	63.24	25	20	16	58	0	1.978	1.299	1.953	1.546	0.98	0.38	0.97	0.63	0.0373658	0.649751	0.0407568	0.155424	0.216501	1	0.276497	0.528819	127.4	83.7	125.8	99.6	64.4	22.97	9.21	11.19	19.5	21.93	148.8	107.2	88.6
FALSE	High	None	Q12164	POM33	D6VXY1; Q12164; sce:YLL023C	Pore membrane protein of 33 kDa [OS=Saccharomyces cerevisiae S288C]	2.808	4	3	1	1	0	1	32.2	1.91	3	1	1	61	0	0.783	0.759	0.753	0.559	-0.35	-0.4	-0.41	-0.84	0.629268	0.525341	0.500457	0.016918	1	1	1	0.127051	102.4	99.3	98.5	73.1	130.8	15.21	2.64	15.85	14.97	18.92	94.6	117.3	100.2
FALSE	High	IsMasterProtein	P17883	SKI3	P17883; Q06585; sce:YPR189W	Superkiller protein 3 [OS=Saccharomyces cerevisiae S288C]	9.123	0	2	2	2	2	2	163.6	7.59	2	2	2	69	0	0.838	0.919	0.912	1.204	-0.26	-0.12	-0.13	0.27	0.774509	0.985662	0.979302	0.698292	1	1	1	1	83.7	91.9	91.2	120.4	100	15.7	8.87	11.67	10.9	18.71	73.5	91.9	96
FALSE	High	IsMasterProtein	P33338	SLA2	D6W0V0; P33338; Q02434; sce:YNL243W	Protein SLA2 [OS=Saccharomyces cerevisiae S288C]	3.416	3	2	1	1	1	1	108.8	3.7	2	1	1	126	0	0.751	1.146	0.884	0.833	-0.41	0.2	-0.18	-0.26	0.22033	0.799849	0.852128	0.584199	0.589647	1	1	1	78.4	119.6	92.3	87	104.4	4.65	18.38	2.81	8.93	15.38	81.9	87.5	147.2
FALSE	High	IsMasterProtein	P36119	RQT4	D6VX88; P36119; sce:YKR023W	RQC trigger complex subunit RQT4 [OS=Saccharomyces cerevisiae S288C]	132.788	0	44	23	45	23	23	60.8	129.27	44	45	23	114	0	3.861	0.679	1.85	0.804	1.95	-0.56	0.89	-0.32	1.3974e-06	0.00575014	0.000340526	0.192357	0.00160562	0.12455	0.0300973	0.600053	245.8	43.2	117.8	51.2	63.7	3	3.95	1.35	9.65	10.66	248.2	258.9	45.8
FALSE	High	IsMasterProtein	Q07807	PUF3	D6VXY9; Q02601; Q07807; sce:YLL013C	mRNA-binding protein PUF3 [OS=Saccharomyces cerevisiae S288C]	89.073	0	21	18	27	18	18	98	73.86	21	27	18	143	0	1.764	1.498	2.019	6.658	0.82	0.58	1.01	2.74	0.147484	0.394318	0.0630975	0.000180739	0.458379	1	0.336833	0.0129793	73.7	62.6	84.4	278.4	41.8	3.44	7.68	6.32	29.03	19.13	65.7	69	54.1
FALSE	High	IsMasterProtein	P38691	KSP1	D3DL33; P38691; sce:YHR082C	Serine/threonine-protein kinase KSP1 [OS=Saccharomyces cerevisiae S288C]	4.51	1	3	2	2	2	2	117	5.13	3	2	2	109	0	0.746	0.729	0.97	0.926	-0.42	-0.46	-0.04	-0.11	0.760025	0.707037	0.999988	1	1	1	1	1	84.6	82.7	109.9	105	113.4	9.93	2.39	12.09	34.91	27.07	75.9	87.3	80.9
FALSE	High	IsMasterProtein	P17076	RPL8A	D3DKT5; P17076; sce:YHL033C	60S ribosomal protein L8-A [OS=Saccharomyces cerevisiae S288C]	95.231	0	58	14	60	2	2	28.1	195.29	58	60	14	68	10	0.841	1.065	0.734	0.677	-0.25	0.09	-0.45	-0.56	0.986535	0.99989	0.871204	0.607159	1	1	1	1	86.1	109	75.1	69.3	102.4	1.91	10.41	13.2	48.28	12.15	88.4	86.1	119
FALSE	High	IsMasterProtein	P36040	ADD66	D6VWZ7; P36040; sce:YKL206C	Proteasome assembly chaperone 2 [OS=Saccharomyces cerevisiae S288C]	7.539	0	13	3	3	3	3	30.7	7.73	13	3	3	20	0	1.789	0.978	1.49	0.955	0.84	-0.03	0.58	-0.07	0.246342	0.999998	0.569427	0.999959	0.62531	1	1	1	154.7	84.6	128.8	82.6	86.5	7.58	54.81	15.95	8.6	3.32	146.4	163	56.1
FALSE	High	IsMasterProtein	P00401	COX1	A0A0A7NYF6; P00401; Q9ZZX6; sce:Q0045	Cytochrome c oxidase subunit 1 [OS=Saccharomyces cerevisiae S288C]	3.804	3	3	1	1	1	1	58.8	3.79	3	1	1	84	0	0.535	1.821	0.712	0.635	-0.9	0.86	-0.49	-0.66	0.0133332	0.0164451	0.167756	0.0569965	0.111842	0.185088	0.589455	0.270627	56.7	193.1	75.5	67.3	106	4.78	23.91	7.07	8.26	8.48	59.1	63.2	246.8
FALSE	High	IsMasterProtein	Q03834	MSH6	D6VS82; Q03834; sce:YDR097C	DNA mismatch repair protein MSH6 [OS=Saccharomyces cerevisiae S288C]	5.426	1	2	2	2	2	2	140	5.2	2	2	2	112	0	0.52	0.888	0.732	0.589	-0.94	-0.17	-0.45	-0.76	0.159422	0.992261	0.73101	0.29634	0.479519	1	1	0.766443	64.2	109.6	90.4	72.8	123.5	13.81	3.82	6.36	32.74	37.51	62.3	75.8	120.5
FALSE	High	IsMasterProtein	P28007	GAR1	D3DL41; P28007; sce:YHR089C	H/ACA ribonucleoprotein complex subunit GAR1 [OS=Saccharomyces cerevisiae S288C]	19.36	0	27	4	4	4	4	21.5	13.36	27	4	4	65	0	1.881	3.622	2.426	1.761	0.91	1.86	1.28	0.82	0.691744	0.132685	0.398036	0.965905	1	0.569625	1	1	92.6	178.3	119.4	86.7	49.2	28.43	1.83	6.01	50.35	10.07	116.3	77.4	184.9
FALSE	High	IsMasterProtein	P53893	RIA1	D6W119; P53893; sce:YNL163C	Ribosome assembly protein 1 [OS=Saccharomyces cerevisiae S288C]	4.686	1	1	1	2	1	1	124.4	5.82	1	2	1	50	0
FALSE	High	IsMasterProtein	P21951	POL2	D6W0T1; P21951; sce:YNL262W	DNA polymerase epsilon catalytic subunit A [OS=Saccharomyces cerevisiae S288C]	79.176	0	10	16	23	16	16	255.5	72	10	23	16	175	0	0.642	0.746	0.826	0.86	-0.64	-0.42	-0.28	-0.22	0.30085	0.66115	0.905429	0.743512	0.716558	1	1	1	76.1	88.4	97.9	101.9	118.4	8.51	5.69	2.79	32.25	0.35	81.6	72.3	85.7
FALSE	High	IsMasterProtein	Q04305	UTP15	D6VZR6; Q04305; sce:YMR093W	U3 small nucleolar RNA-associated protein 15 [OS=Saccharomyces cerevisiae S288C]	6.826	0	5	2	2	2	2	57.7	5.37	5	2	2	97	0	0.997	0.705	0.813	0.746	0	-0.5	-0.3	-0.42	1	0.735874	0.954986	0.411483	1	1	1	0.914378	109.7	77.5	89.5	82	110	22.21	5.73	7.05	37.95	8.34	96.7	132.8	83.4
FALSE	High	IsMasterProtein	P15019	TAL1	D6VYZ2; P15019; sce:YLR354C	Transaldolase [OS=Saccharomyces cerevisiae S288C]	5.213	1	5	1	1	1	1	37	3.65	5	1	1	46	0
FALSE	High	IsMasterProtein	P07259	URA2	A2TBN0; D6VW55; P07259; Q06HN1; sce:YJL130C	Protein URA2 [OS=Saccharomyces cerevisiae S288C]	130.41	0	17	32	41	30	30	244.9	124.46	17	41	32	151	2	0.663	0.909	0.699	0.885	-0.59	-0.14	-0.52	-0.18	0.235866	0.988762	0.343137	0.994711	0.614536	1	0.914766	1	78.3	107.3	82.5	104.5	118	0.53	18.23	3.4	26.88	6.71	76.2	76.8	119.3
FALSE	High	IsMasterProtein	P53112	PEX14	D6VTZ8; P53112; sce:YGL153W	Peroxisomal membrane protein PEX14 [OS=Saccharomyces cerevisiae S288C]	4.971	1	5	1	1	1	1	38.4	3.61	5	1	1	59	0
FALSE	High	IsMasterProtein	P32501	GCD6	D6VSJ5; P32501; sce:YDR211W	Translation initiation factor eIF-2B subunit epsilon [OS=Saccharomyces cerevisiae S288C]	22.352	0	9	5	6	5	5	81.1	19.94	9	6	5	82	0	0.472	0.58	0.588	0.636	-1.08	-0.79	-0.77	-0.65	0.399019	0.679302	0.698192	0.990377	0.853767	1	1	1	57.9	71.2	72.1	78	122.7	10.88	11.03	9.12	71.67	8.54	49.7	58	71.3
FALSE	Low	IsMasterProtein	Q04406	EMI1	D6VTD3; Q04406; sce:YDR512C	Early meiotic induction protein 1 [OS=Saccharomyces cerevisiae S288C]	1.061	75	3	1	2	1	1	21.1	1.99	3	2	1	7	0	2.063	5.582	2.397	1.81	1.05	2.48	1.26	0.86	0.19692	0.00485732	0.104498	0.338773	0.550514	0.120442	0.427287	0.816038	86.6	234.3	100.6	76	42	5.84	15.25	27.43	20.7	18.86	88.8	96.5	224.7
FALSE	High	IsMasterProtein	Q12017	PLP2	D6W2Y0; Q12017; sce:YOR281C	Phosducin-like protein 2 [OS=Saccharomyces cerevisiae S288C]	43.272	0	37	9	13	9	9	32.8	40.18	37	13	9	72	0	2.336	0.994	1.749	0.888	1.22	-0.01	0.81	-0.17	0.00105418	1	0.0121121	0.9986	0.0331978	1	0.148149	1	179.4	76.4	134.3	68.2	76.8	3.71	10.16	7.66	16.22	1.86	185.8	176.3	71.7
FALSE	High	IsMasterProtein	P27472	GSY2	D6VYQ5; P27472; sce:YLR258W	Glycogen [starch] synthase isoform 2 [OS=Saccharomyces cerevisiae S288C]	7.782	0	3	2	2	2	2	80	4.89	3	2	2	46	0	10.727	13.873	14.093	8.538	3.42	3.79	3.82	3.09	0.0190887	0.0110543	0.0106995	0.0224827	0.145468	0.156671	0.141307	0.151337	122.6	158.5	161.1	97.6	11.4	18.34	10.63	11.27	35.81	69	105.3	136.7	167.3
FALSE	High	IsMasterProtein	P32590	SSE2	D6VQG5; P32590; sce:YBR169C	Heat shock protein homolog SSE2 [OS=Saccharomyces cerevisiae S288C]	48.317	0	16	11	14	5	5	77.6	44.58	16	14	11	64	0	0.746	1.109	1.242	0.784	-0.42	0.15	0.31	-0.35	0.624338	0.990832	0.83356	0.597814	1	1	1	1	72.8	108.3	121.4	76.6	97.7	1.12	18.65	1.07	25.07	19.55	73.4	74.6	125.6
FALSE	High	None	P06367	RPS14A	D6VR41; P06367; Q96VG9; sce:YCR031C	40S ribosomal protein S14-A [OS=Saccharomyces cerevisiae S288C]	22.226	0	36	5	5	0	5	14.5	14.45	36	5	5	95	0	0.298	1.093	0.384	0.725	-1.75	0.13	-1.38	-0.46	0.0565316	0.999708	0.145913	0.670921	0.275061	1	0.532036	1	41.7	153.2	53.8	101.7	140.2	5.61	36.94	5.26	47.8	11.2	43.3	40	199.9
FALSE	Low	IsMasterProtein	P38167	ECM21	D6VPQ2; P38167; sce:YBL101C	Protein ECM21 [OS=Saccharomyces cerevisiae S288C]	1.032	76	1	1	1	1	1	123.5	0	1	1	1	32	0
FALSE	High	IsMasterProtein	P34760	TSA1	D6VZE6; P34760; sce:YML028W	Peroxiredoxin TSA1 [OS=Saccharomyces cerevisiae S288C]	25.089	0	29	6	8	5	6	21.6	22.5	29	8	6	134	0	2.29	2.517	2.586	1.768	1.2	1.33	1.37	0.82	0.0573187	0.034762	0.0302645	0.171526	0.276719	0.26783	0.246624	0.556268	117.1	128.7	132.2	90.4	51.1	1.23	1.32	2.3	3.02	41.71	117.8	115.8	129.6
FALSE	High	IsMasterProtein	P53959	COG6	D6W1D8; P53959; sce:YNL041C	Conserved oligomeric Golgi complex subunit 6 [OS=Saccharomyces cerevisiae S288C]	31.588	0	9	5	8	5	5	96.9	26.98	9	8	5	47	0	0.925	0.47	0.879	0.542	-0.11	-1.09	-0.19	-0.88	0.999992	0.803419	0.999909	0.379343	1	1	1	0.871358	120.6	61.3	114.7	70.7	130.4	14.64	10.58	1.12	70.31	7.86	115	141.5	69.9
FALSE	High	IsMasterProtein	Q02256	YVH1	D6VVV7; Q02256; sce:YIR026C	Tyrosine-protein phosphatase YVH1 [OS=Saccharomyces cerevisiae S288C]	13.19	0	12	2	2	2	2	41.2	8.93	12	2	2	137	0	0.698	0.519	0.639	0.6	-0.52	-0.95	-0.65	-0.74	0.256293	0.027672	0.13004	0.0794482	0.638787	0.235315	0.491828	0.335348	96.4	71.7	88.3	82.8	138.1	19.1	0.73	16.75	20.42	6.38	90.7	119	76.9
FALSE	High	IsMasterProtein	P22137	CHC1	D6VTU9; P22137; sce:YGL206C	Clathrin heavy chain [OS=Saccharomyces cerevisiae S288C]	57.785	0	13	16	19	16	16	187.1	52.76	13	19	16	99	0	0.463	1.172	0.615	0.761	-1.11	0.23	-0.7	-0.39	0.277072	0.995002	0.673957	0.991919	0.677353	1	1	1	55	139.4	73.1	90.6	118.9	5.52	26.08	7.36	57.76	4.82	50.4	54.5	160.1
FALSE	High	IsMasterProtein	P48015	GCV1	D6VS05; P48015; sce:YDR019C	Aminomethyltransferase, mitochondrial [OS=Saccharomyces cerevisiae S288C]	2.825	4	4	2	2	2	2	44.4	2.4	4	2	2	47	0	21.365	1.885	9.539	5.236	4.42	0.91	3.25	2.39									284.9	25.1	127.2	69.8	13.3	14.99		11.58	19.18		346.2	279.8	27.5
FALSE	High	IsMasterProtein	P32597	STH1	D6VVG1; P32597; Q45U09; sce:YIL126W	Nuclear protein STH1/NPS1 [OS=Saccharomyces cerevisiae S288C]	4.222	3	1	1	1	1	1	156.6	3.03	1	1	1	173	0	0.422	0.546	0.527	0.572	-1.25	-0.87	-0.92	-0.81	0.648275	0.871715	0.846154	0.999844	1	1	1	1	70.1	90.7	87.6	95	166.1	15.8	10.77	10.89	106.31	1.29	61.6	49.2	76.9
FALSE	High	IsMasterProtein	P39078	CCT4	D6VRK5; P39078; Q07561; sce:YDL143W	T-complex protein 1 subunit delta [OS=Saccharomyces cerevisiae S288C]	26.667	0	15	6	6	6	6	57.6	20.46	15	6	6	46	0	0.633	0.804	0.8	0.787	-0.66	-0.31	-0.32	-0.35	0.064617	0.566037	0.547742	0.260203	0.295796	1	1	0.715305	75.1	95.4	94.9	93.3	118.6	7.81	16.81	4.56	18.03	1.63	71.8	80.2	108.6
FALSE	High	IsMasterProtein	Q12427	STB3	D6VSE9; Q12427; sce:YDR169C	Protein STB3 [OS=Saccharomyces cerevisiae S288C]	11.813	0	6	3	3	3	3	56.2	9.61	6	3	3	109	0	0.892	0.185	0.898	0.717	-0.16	-2.43	-0.15	-0.48	0.947367	0.000132581	0.959132	0.268902	1	0.0253671	1	0.728699	129.7	26.9	130.6	104.3	145.4	3.61	17.37	13.29	0.26	16.95	143.6	136.4	25.7
FALSE	High	IsMasterProtein	P38254	PBY1	D6VQ95; P38254; sce:YBR094W	Probable tubulin--tyrosine ligase PBY1 [OS=Saccharomyces cerevisiae S288C]	6.879	0	5	2	2	2	2	86.3	5.4	5	2	2	38	0	0.597	0.765	0.62	0.515	-0.75	-0.39	-0.69	-0.96	0.0119431	0.210698	0.0180049	0.000925608	0.108052	0.770322	0.179892	0.0226282	80.9	103.8	84.1	69.8	135.7	8.49	1.27	14.53	13.56	6.81	78.7	88.7	108.1
FALSE	High	None	Q12085	TY1A-GR1	D6VUG2; Q12085; sce:YGR027W-A	Transposon Ty1-GR1 Gag polyprotein [OS=Saccharomyces cerevisiae S288C]	69.098	0	38	13	18	0	3	49	56.12	38	18	13	21	0	1.487	1.163	1.427	3.794	0.57	0.22	0.51	1.92	0.118019	0.835584	0.175461	7.20385e-05	0.394197	1	0.591669	0.00752475	86.1	67.3	82.6	219.6	57.9	10.46	6.39	2.92	15.73	14.99	83.4	71.9	63.4
FALSE	High	IsMasterProtein	Q04279	SEG1	D6VZQ9; Q04279; Q6B304; sce:YMR086W	Eisosome protein SEG1 [OS=Saccharomyces cerevisiae S288C]	2.337	5	2	2	2	2	2	105.8	2.27	2	2	2	13	0	0.378	0.404	0.393	0.453	-1.4	-1.31	-1.35	-1.14	0.663297	0.718463	0.695907	0.994948	1	1	1	1	73.7	78.8	76.7	88.3	194.8	15.7	27.18	4.53	116.1	26.33	61.8	49.4	71.8
FALSE	High	IsMasterProtein	Q07655	WHI4	D6VRD1; Q07655; sce:YDL224C	Protein WHI4 [OS=Saccharomyces cerevisiae S288C]	115.787	0	33	18	26	17	17	70.6	89.86	33	26	18	69	1	2.029	1.064	3.113	6.998	1.02	0.09	1.64	2.81	0.446437	0.999968	0.111689	0.0139679	0.898634	1	0.443993	0.113824	75.6	39.6	116	260.7	37.2	0.65	3.71	1.96	52.14	10.81	73.9	74.6	40
FALSE	Medium	IsMasterProtein	P32500	NDC1	D6VZE3; P32500; sce:YML031W	Nucleoporin NDC1 [OS=Saccharomyces cerevisiae S288C]	1.223	64	1	1	1	1	1	74.1	0	1	1	1	79	0
FALSE	High	IsMasterProtein	P00950	GPM1	D6VX45; P00950; Q02117; sce:YKL152C	Phosphoglycerate mutase 1 [OS=Saccharomyces cerevisiae S288C]	61.138	0	45	12	17	12	12	27.6	48.04	45	17	12	93	0	2.08	2.085	1.722	1.161	1.06	1.06	0.78	0.21	0.890571	0.889211	0.964288	0.939089	1	1	1	1	131.7	132.1	109.1	73.5	63.3	2.67	3.53	1.35	73.79	0.91	138.1	143.4	144.6
[truncated: 165 more rows]
[truncated: 47 more columns]

## Sheet: Def1 (FL) 1-738
Accession	Gene Symbol	Gene ID	Description	Abundance Ratio: (DEF1_FL-TID) / (Free_TID)	Abundance Ratio (log2): (DEF1_FL-TID) / (Free_TID)	Abundance Ratio P-Value: (DEF1_FL-TID) / (Free_TID)
[truncated: 185 more rows]

[truncated: 4 more sheets: Def1 (1-530), Def1(1-500), Def1(1-380), Summary]
