# Supplementary material
Source: HighWire-hosted journal article supplement (doi:10.1101/rna.080884.125)
Supplement: Supplemental_Table_.docx [file Supplemental_Table_.docx]

**Supplemental Table 1. Yeast strains**

| BY4741 | MAT a his3Δ1; leu2Δ0; met15Δ0; ura3Δ0 |  |
| --- | --- | --- |
| BY4742 | MAT alpha his3∆1; leu2∆0; lys2∆0; ura3∆0 |  |
| W303 | MAT alpha, RAD5+, ade2-11; his3-11,15; leu2-3,112; ura3-1; trp1-1; can1-100 | Zhao,X. 2002 |
| JR1178 | BY4741, dhh1∆::KanMX | Jiang, 2019 |
| JR1189 | BY4741, not4::KanMX | Jiang, 2019 |
| JR1873 | BY4741, not4∆ring | Jiang, 2019 |
| JR2204 | W303, def1∆::KanMx | This study |
| JR2161 | W303, not4∆ring | This study |
| JR2185 | W303, osTIR1-myc::LEU2 | This study |
| JR2188 | W303, osTIR1-myc::LEU2; NOT4-AID-V5::KanMX | This study |
| JR2189 | W303, osTIR1-myc::LEU2; NOT1-AID-V5::KanMX | This study |
| JR2197 | W303, def1(F33A,P34A) CUE1 mut | This study |
| JR2199 | W303, def1 (F33A,P34A,I54A,I55A) CUE1,CUE2 mut | This study |
| JR1951 | BY4742, CHA1p-TID-3HA:: KanMX | Pfannenstein,2024 |
| JR2200 | BY4742, DEF1 (1-738)-TID-3HA:: KanMX | This study |
| JR2201 | BY4742, DEF1 (1-530)-TID-3:: KanMX | This study |
| JR2202 | BY4742, DEF1 (1-500)-TID-HA3:: KanMX | This study |
| JR2203 | BY4742, DEF1 (1-380) -TID-HA3:: KanMX | This study |
| JR2204 | W303, def1∆::KanMx | This study |
| JR2218 | BY4742, DEF1 (1-738)-GFP:: KanMX | This study |
| JR2220 | BY4742, DEF1 (1-500)-GFP:: KanMX | This study |
| JR2221 | BY4742, DEF1 (1-380)-GFP:: KanMX | This study |
| JR2894 | BY4742, RPB1-GFP:: KanMX | This study |
| JR2227 | MATa eS7aΔ::HIS3MX6 eS7bΔ::natNT2 p415-eS7A-HA  ade2 his3 leu2 trp1 ura3 can1 | Buschauer, 2020 |
| JR2228 | MATa eS7aΔ::HIS3MX6 eS7bΔ::natNT2 p415-eS7A (KRmut)-HA  ade2 his3 leu2 trp1 ura3 can1 | Buschauer,2020 |

**References:**

Buschauer R, Matsuo Y, Sugiyama T, Chen YH, Alhusaini N, Sweet T, Ikeuchi K, Cheng J, Matsuki Y, Nobuta R, Gilmozzi A, Berninghausen O, Tesina P, Becker T, Coller J, Inada T, Beckmann R. The Ccr4-Not complex monitors the translating ribosome for codon optimality. Science. 2020 Apr 17;368(6488):eaay6912. doi: 10.1126/science.aay6912.

Jiang H, Wolgast M, Beebe LM, Reese JC. Ccr4-Not maintains genomic integrity by controlling the ubiquitylation and degradation of arrested RNAPII. Genes Dev. 2019 Jun 1;33(11-12):705-717. doi: 10.1101/gad.322453.118. Epub 2019 Apr 4.

Pfannenstein J, Tyryshkin M, Gulden ME, Doud EH, Mosley AL, Reese JC. Characterization of BioID tagging systems in budding yeast and exploring the interactome of the Ccr4-Not complex. G3 (Bethesda, Md.) 2024 Vol. 14 Issue 11 DOI: 10.1093/g3journal/jkae221

Zhao X, Rothstein R. The Dun1 checkpoint kinase phosphorylates and regulates the ribonucleotide reductase inhibitor Sml1. Proc Natl Acad Sci U S A. 2002 Mar 19;99(6):3746-51. doi: 10.1073/pnas.062502299.
