# Supplementary material
Source: HighWire-hosted journal article supplement (doi:10.1101/rna.080884.125)
Supplement: Supplemental_Table_2.docx [file Supplemental_Table_2.docx]

|  | features | description | reference |
| --- | --- | --- | --- |
| pJC428 | pGAL1-M/GFP-URA3 | MFA2/GFP -reporter | Sweet, 2012 |
| pTIR1 | GPD1pr-OsTIR1-cgLEU2 | OsTir1 expression | Shetty, 2019 |
| pScAID2 | 3xV5-IAA7-KanMX6 | AID tagging vector | Shetty, 2019 |
| pJR106 | pFA6a-TID-HA3-KanMX6 | Turbo ID (TID) tagging | Pfannenstein, 2024 |
| pJR160 | pRS415- DEF1pr-MCP-FLAG3-DEF1 UTR | Free MCP expressed from the DEF1 promoter | Akinniyi, 2025 |
| pJR161 | pRS415-DEF1-MCP-FLAG3 | DEF1-MCP | Akinniyi, 2025 |
| pJR163 | pRS415-DEF1 (1-380)-MCP-FLAG3 | DEF1-MCP aa 1-380 | This study |
| pJR166 | pRS415-DEF1 (Cuemut1)-MCP-FLAG3 | DEF1-MCP cue1 mutant | This study |
| pJR167 | pRS415-DEF1 (Cuemut1,2)-MCP-FLAG3 | DEF1-MCP cue1,2 mutant | This study |
| pML104 | CRISPR-Cas9 URA3 | sgRNA expression and Cas9 | Laughery, 2015 |
| pJR168 | pML104 -DEF1 sgRNA 71  TTCTGTAAGCGTATCTATTTTGG | Gene editing of DEF1 | This study |
| pJR169 | pBS-KS Def1 CUE1,2 | Repair plasmid for gene editing | This study |
| pJR170 | pGPD1pr-HIS3 (0% OPT)-URA3 | Codon optimality reporter | This study |
| pJR171 | pGPD1pr-HIS3 (30% OPT)-URA3 | Codon optimality reporter | This study |
| pJR172 | pGPD1pr-HIS3 (50% OPT)-URA3 | Codon optimality reporter | This study |
| pJR173 | pGPD1pr-HIS3 (100% OPT)-URA3 | Codon optimality reporter | This study |

**Supplemental Table 2: plasmids**

**References:**

Akinniyi OT, Kulkarni S, Hribal MM, Keller CA, Giardine BM, Reese JC. 2025. Gene expression analysis and proximity labeling reveal post-transcriptional functions of the yeast RNA polymerase II regulator Def1. *J Biol Chem* **302**: 111003.

Laughery MF, Hunter T, Brown A, Hoopes J, Ostbye T, Shumaker T, Wyrick JJ. New vectors for simple and streamlined CRISPR-Cas9 genome editing in *Saccharomyces cerevisiae*. Yeast. 2015 Dec;32(12):711-20. doi: 10.1002/yea.3098.

Pfannenstein J, Tyryshkin M, Gulden ME, Doud EH, Mosley AL, Reese JC. Characterization of BioID tagging systems in budding yeast and exploring the interactome of the Ccr4-Not complex. G3 (Bethesda, Md.) 2024 Vol. 14 Issue 11 DOI: 10.1093/g3journal/jkae221

Shetty A, Reim NI, Winston F. Auxin-Inducible Degron System for Depletion of Proteins in Saccharomyces cerevisiae. Curr Protoc Mol Biol. 2019 Sep;128(1):e104. doi: 10.1002/cpmb.104.

Sweet T, Kovalak C, Coller J. The DEAD-box protein Dhh1 promotes decapping by slowing ribosome movement. PLoS Biol. 2012;10(6):e1001342. doi: 10.1371/journal.pbio.1001342. Epub 2012 Jun 12.
